# Supplementary material for: Unravelling Differential DNA Methylation Patterns in Genotype Dependent Manner under Salinity Stress Response in Chickpea
Source: MDPI journal article supplement (doi:10.3390/ijms24031863), 2023-01-18
Supplement: s1 [file s1]

Table S1: Details of bisulphite sequencing libraries generated in this study.

|                                     |        | <b>SS-C</b> | <b>SS-S</b> | <b>ST-C</b> | <b>ST-S</b> |
|-------------------------------------|--------|-------------|-------------|-------------|-------------|
| Total reads                         | Rep I  | 216517166   | 215614008   | 215443642   | 214927470   |
|                                     | Rep II | 200244584   | 290959084   | 301267100   | 301693478   |
| High quality reads                  | Rep I  | 216517130   | 215613986   | 215443622   | 214927442   |
|                                     | Rep II | 200242704   | 290958822   | 301266918   | 301693294   |
| Uniquely mapped read pairs          | Rep I  | 55945579    | 57634013    | 56144344    | 55728169    |
|                                     | Rep II | 44403836    | 74174529    | 68183504    | 70791619    |
| Mapping efficiency (%)              | Rep I  | 51.70%      | 53.50%      | 52.10%      | 51.90%      |
|                                     | Rep II | 44.40%      | 51.00%      | 45.30%      | 46.90%      |
| Genome coverage (%)                 | Rep I  | 88.43%      | 88.35%      | 88.54%      | 88.34%      |
|                                     | Rep II | 88.29%      | 88.91%      | 88.61%      | 88.86%      |
| Chloroplast DNA conversion rate (%) | Rep I  | 99.992      | 99.993      | 99.993      | 99.993      |
|                                     | Rep II | 99.990      | 99.992      | 99.993      | 99.993      |
| Error rate                          | Rep I  | 0.00782     | 0.00698     | 0.00672     | 0.00711     |
|                                     | Rep II | 0.00978     | 0.00821     | 0.00744     | 0.0075      |
| Total methylated Cs                 | Rep I  | 130236897   | 129970400   | 130471865   | 128587239   |
|                                     | Rep II | 129614244   | 133485545   | 131990475   | 133475645   |
| Total methylated C's (%)            | Rep I  | 16.81       | 17.33       | 17.60       | 17.62       |
|                                     | Rep II | 13.44       | 18.12       | 16.73       | 18.57       |

Table S3: Total number of raw reads generated, high quality reads and mapping percentage of RNA sequencing data in control and stress samples of SS and ST genotype.

|       | QC                 |                       |               | Mapping      |                       |
|-------|--------------------|-----------------------|---------------|--------------|-----------------------|
|       | Total No. of reads | Total No. of HQ reads | % of HQ reads | Mapped reads | Over all mapping rate |
| SS-C1 | 11822910           | 11779659              | 99.63%        | 11555946     | 98.1%                 |
| SS-C2 | 12656423           | 12614898              | 99.67%        | 12373472     | 98.1%                 |
| SS-S1 | 10361560           | 10325023              | 99.65%        | 10123631     | 98.1%                 |
| SS-S2 | 10953338           | 10917290              | 99.67%        | 10717801     | 98.2%                 |
| ST-C1 | 8279106            | 8252039               | 99.67%        | 8093207      | 98.1%                 |
| ST-C2 | 11752512           | 11713945              | 99.67%        | 11407610     | 97.4%                 |
| ST-S1 | 10625852           | 10586951              | 99.63%        | 10385638     | 98.1%                 |
| ST-S2 | 11114251           | 11079906              | 99.69%        | 10870826     | 98.1%                 |

Table S7: Total number of 21-nt and 24-nt small RNAs identified in control and stress samples of SS and ST genotype in response to salinity stress.

|      | 21-nt | 24-nt   |
|------|-------|---------|
| SS-C | 90160 | 1551008 |
| SS-S | 68028 | 1436690 |
| ST-C | 81835 | 1294844 |
| ST-S | 52378 | 724464  |
