# Supplementary material for: Unravelling Differential DNA Methylation Patterns in Genotype Dependent Manner under Salinity Stress Response in Chickpea
Source: Int J Mol Sci. 2023 Jan 18;24(3):1863. doi: 10.3390/ijms24031863 (PMC9915442; doi:10.3390/ijms24031863)
Supplement: Supplementary file 1 [file ijms-24-01863-s001.zip]

Archive with 8 entries (8 files):
- salinity-figures-supplimentary-final.pdf
- salinity-supplimentary-tables.pdf
- Supplementary Information-details.pdf
- Supplementary Table S2.xlsx
- Supplementary Table S4.xlsx
- Supplementary Table S5.xlsx
- Supplementary Table S6.xlsx
- Supplementary Table S8.xlsx
