# Supplementary material for: Unravelling Differential DNA Methylation Patterns in Genotype Dependent Manner under Salinity Stress Response in Chickpea
Source: Int J Mol Sci. 2023 Jan 18;24(3):1863. doi: 10.3390/ijms24031863 (PMC9915442; doi:10.3390/ijms24031863)
Supplement: Supplementary file 1 [file ijms-24-01863-s001.zip › Supplementary Table S2.xlsx]

## Sheet: SS-DMRs
CG						CHG						CHH
Chr	Start	End	p-value	methylation difference		Chr	Start	End	p-value	methylation difference		Chr	Start	End	p-value	methylation difference
Ca1	105501	105600	1.57681e-12	36.9362		Ca1	79251	79400	8.01411e-13	29.2585		Ca1	329001	329100	1.66792e-05	17.6771
Ca1	231951	232100	2.65057e-14	47.5115		Ca1	1081001	1081100	7.1479e-06	28.5768		Ca1	583801	583900	1.57335e-06	18.2453
Ca1	648351	648450	3.06402e-15	26.9956		Ca1	1508401	1508500	4.76762e-14	28.5893		Ca1	689401	689500	1.46482e-06	21.4847
Ca1	654801	654900	4.09684e-11	25.9476		Ca1	1752001	1752100	7.63816e-07	25.1671		Ca1	1040401	1040500	2.6219e-06	16.8062
Ca1	773401	773500	4.0198e-08	26.4216		Ca1	2484251	2484350	2.60015e-05	25.9215		Ca1	1548901	1549000	7.0567e-06	21.1482
Ca1	774051	774150	7.39265e-14	26.3158		Ca1	3628301	3628450	2.56061e-21	31.2174		Ca1	1683051	1683150	2.27557e-06	19.4174
Ca1	924001	924150	2.44946e-15	38.2933		Ca1	7156951	7157050	1.45361e-07	29.4075		Ca1	1683201	1683300	5.80647e-06	19.1508
Ca1	998751	998850	9.77031e-13	55.803		Ca1	7157101	7157200	4.29587e-16	29.1045		Ca1	1815901	1816000	2.96771e-06	21.3547
Ca1	1050701	1050850	4.40782e-15	30.9364		Ca1	7905651	7905750	5.23274e-14	27.7889		Ca1	2061001	2061100	2.19474e-06	19.7078
Ca1	1219501	1219600	1.36819e-08	25.0776		Ca1	8297651	8297800	6.46627e-08	29.816		Ca1	2547701	2547800	1.72348e-05	16.7942
Ca1	1739501	1739650	1.36967e-13	27.275		Ca1	8964101	8964200	1.55205e-07	25.7828		Ca1	2875051	2875150	2.18592e-05	16.6303
Ca1	1834351	1834500	2.79687e-18	35.3082		Ca1	8970451	8970600	3.22524e-43	59.2125		Ca1	3063201	3063300	1.82202e-06	17.6775
Ca1	2074301	2074450	1.7551e-32	32.8355		Ca1	9881101	9881200	1.47312e-11	26.9919		Ca1	3130151	3130250	2.13691e-05	20.1429
Ca1	2191451	2191600	3.54475e-13	48.192		Ca1	9881201	9881300	4.52268e-10	25.6125		Ca1	3169851	3169950	2.33055e-06	16.8683
Ca1	2209901	2210050	1.20535e-11	35.1308		Ca1	9881351	9881500	6.20901e-10	26.3764		Ca1	3456801	3456900	1.12082e-05	26.8641
Ca1	2270351	2270500	8.92238e-15	37.2898		Ca1	12645051	12645150	8.93286e-07	25.0558		Ca1	3703651	3703750	3.9241e-07	23.456
Ca1	2402351	2402450	7.87394e-20	31.833		Ca1	13549251	13549350	2.05024e-14	26.6486		Ca1	3872701	3872800	1.40462e-07	30.6489
Ca1	2460501	2460600	4.34699e-24	35.7823		Ca1	16280951	16281100	2.3616e-11	42.4019		Ca1	3886901	3887050	2.24858e-07	21.2908
Ca1	2856551	2856650	1.39974e-14	31.2955		Ca1	16281051	16281200	5.68008e-17	41.1249		Ca1	4400301	4400450	1.06916e-06	26.2445
Ca1	3027151	3027300	4.44988e-35	62.9988		Ca1	16733651	16733750	2.10267e-07	26.2718		Ca1	4552351	4552450	7.15946e-07	26.0326
Ca1	3083451	3083600	4.93641e-12	42.3144		Ca1	17410351	17410450	6.36586e-11	29.8485		Ca1	4932401	4932550	9.78187e-07	17.3112
Ca1	3210651	3210750	2.32106e-30	58.9348		Ca1	19326801	19326900	1.01553e-06	28.9474		Ca1	5062601	5062700	6.41976e-06	23.8538
Ca1	3294001	3294100	2.52381e-08	26.5769		Ca1	19683551	19683700	3.80543e-08	25.7281		Ca1	5450451	5450550	2.40165e-06	19.219
Ca1	3774951	3775050	7.37496e-17	25.1683		Ca1	20065901	20066050	8.99714e-19	43.5927		Ca1	5688901	5689000	9.13206e-06	17.1074
Ca1	3798251	3798350	1.55706e-07	28.6684		Ca1	20066001	20066150	1.80885e-27	34.9351		Ca1	5878251	5878350	1.34965e-05	18.2938
Ca1	4546701	4546900	1.84188e-13	29.3387		Ca1	20117601	20117800	4.87686e-13	39.5392		Ca1	5884801	5884900	4.94078e-09	28.6891
Ca1	4626951	4627050	3.61979e-17	50.4065		Ca1	20462001	20462100	3.46404e-12	48.4855		Ca1	6057751	6057850	1.09806e-05	27.0996
Ca1	4899301	4899400	1.46666e-18	50.1309		Ca1	23550701	23550800	1.08364e-24	26.4734		Ca1	6058401	6058500	5.95668e-06	22.6198
Ca1	4945501	4945600	1.30438e-08	33.3658		Ca1	23665501	23665650	1.15384e-14	30.4623		Ca1	6165251	6165400	1.87899e-09	17.2974
Ca1	5628851	5628950	1.51864e-06	28.6233		Ca1	23745051	23745200	1.70074e-30	30.155		Ca1	6191951	6192050	2.91575e-09	26.1914
Ca1	5693001	5693100	4.64464e-28	60.9047		Ca1	25761101	25761200	1.52383e-07	32.3897		Ca1	6354651	6354800	3.15085e-07	25.0176
Ca1	5749001	5749100	3.81999e-15	28.4201		Ca1	25819201	25819300	4.68903e-07	35.7432		Ca1	6359251	6359350	5.88562e-07	23.8825
Ca1	6161501	6161600	3.47453e-12	27.9908		Ca1	25819351	25819450	9.41881e-11	38.4454		Ca1	6360451	6360550	4.36674e-13	20.5157
Ca1	6250301	6250450	6.72545e-26	29.8222		Ca1	27251601	27251800	6.64017e-06	26.1019		Ca1	6556601	6556750	7.86892e-08	21.9705
Ca1	6304901	6305050	2.6536e-91	76.7159		Ca1	28080251	28080400	1.41547e-13	29.7115		Ca1	6571651	6571750	2.00441e-05	18.1362
Ca1	6347951	6348050	1.89743e-11	30.3368		Ca1	28080351	28080500	1.45643e-23	33.8974		Ca1	6874251	6874400	1.10037e-05	27.3679
Ca1	6349351	6349450	1.07805e-12	32.4938		Ca1	28080451	28080600	8.41977e-08	39.6576		Ca1	6874451	6874550	2.64364e-05	18.2562
Ca1	6388001	6388150	6.57727e-58	44.4591		Ca1	28080901	28081050	2.38616e-09	35.1838		Ca1	6922551	6922650	2.11299e-05	23.3287
Ca1	6390951	6391150	1.91837e-25	45.0354		Ca1	28081301	28081400	2.57995e-08	28.6604		Ca1	6941851	6941950	4.74794e-09	20.4342
Ca1	6395851	6395950	3.52371e-24	29.1541		Ca1	28081451	28081550	2.49319e-16	32.8695		Ca1	7015401	7015500	2.85607e-05	28.6029
Ca1	6433851	6433950	9.23265e-11	26.8492		Ca1	29510201	29510300	1.16649e-08	32.6305		Ca1	7242751	7242900	8.00389e-08	22.797
Ca1	6520001	6520150	7.45053e-16	47.8782		Ca1	30178851	30179000	2.74835e-09	25.4254		Ca1	7320551	7320700	3.19535e-08	19.0942
Ca1	6521301	6521400	1.06982e-22	45.5379		Ca1	32258651	32258800	5.05322e-21	55.1737		Ca1	7367351	7367500	5.92789e-10	16.5657
Ca1	6634351	6634450	5.45222e-20	51.9563		Ca1	33171151	33171250	2.78632e-09	37.3328		Ca1	7502801	7502950	1.14515e-08	15.4246
Ca1	6635201	6635300	3.36796e-12	29.3318		Ca1	33185351	33185450	3.77776e-06	26.3557		Ca1	7528251	7528350	8.75056e-06	21.2647
Ca1	6682951	6683050	4.43355e-09	33.3793		Ca1	34197301	34197400	2.06011e-06	28.8982		Ca1	7773751	7773900	1.17807e-07	27.9102
Ca1	6707501	6707650	1.78677e-17	40.9668		Ca1	35920401	35920500	2.35301e-10	26.9545		Ca1	7775301	7775400	9.69721e-06	15.3363
Ca1	6742101	6742250	1.87018e-09	28.3085		Ca1	36993701	36993800	6.27175e-14	35.9317		Ca1	7788651	7788850	6.34267e-08	21.1784
Ca1	6880051	6880200	3.91724e-21	32.3965		Ca1	37833701	37833800	5.99383e-20	26.7082		Ca1	7824501	7824600	3.35011e-07	17.4359
Ca1	6888251	6888350	1.97856e-16	41.7075		Ca1	37870451	37870550	1.45091e-07	25.9036		Ca1	8132601	8132700	5.46386e-06	25.5575
Ca1	6889451	6889550	2.86749e-11	37.9328		Ca1	37870551	37870750	6.43203e-15	27.6995		Ca1	8574751	8574900	2.82834e-06	17.7141
Ca1	6908951	6909050	1.70762e-39	55.6778		Ca1	38164451	38164550	1.29337e-10	25.6573		Ca1	8628901	8629100	2.31725e-10	19.6871
Ca1	6945601	6945700	8.3365e-27	37.8836		Ca1	38918051	38918200	6.70383e-103	83.098		Ca1	8731201	8731300	6.9997e-07	17.6344
Ca1	6977801	6977900	2.90225e-21	34.4253		Ca1	39586751	39586850	1.67483e-05	25.7436		Ca1	8996601	8996750	3.69964e-11	30.0376
Ca1	7093201	7093350	4.8106e-11	27.6133		Ca1	39694201	39694350	1.20953e-29	62.0803		Ca1	8996701	8996850	8.7231e-24	30.4018
Ca1	7186701	7186800	2.24797e-17	42.9801		Ca1	39694301	39694450	2.21176e-29	73.8029		Ca1	9004601	9004700	5.52372e-06	18.0615
Ca1	7228401	7228550	2.88371e-15	30.8436		Ca1	39917001	39917100	3.02528e-12	25.683		Ca1	9014701	9014800	6.95979e-07	16.0167
Ca1	7239801	7239950	1.36659e-08	31.1292		Ca1	43337851	43338000	4.31557e-27	46.9641		Ca1	9113801	9113900	3.65167e-07	24.2345
Ca1	8739401	8739550	3.36751e-11	31.7701		Ca1	43338051	43338150	2.53429e-34	62.5287		Ca1	9122451	9122550	2.44935e-05	19.5556
Ca1	8781301	8781400	6.41947e-13	31.1234		Ca1	43797751	43797950	3.75141e-15	27.925		Ca1	9167551	9167700	1.21916e-07	16.3383
Ca1	8792851	8793000	1.26668e-26	42.8201		Ca1	46531001	46531150	2.14895e-07	34.1162		Ca1	9316951	9317050	6.90755e-09	22.2532
Ca1	8859951	8860050	3.12728e-07	25.9024		Ca1	46531951	46532100	2.87888e-22	26.3918		Ca1	9620101	9620200	6.20088e-06	22.0431
Ca1	8885901	8886050	1.86353e-14	25.2726		Ca1	46534751	46534850	1.3731e-16	26.9874		Ca1	9723401	9723500	3.11999e-06	24.1117
Ca1	8893551	8893650	1.43173e-29	32.3979		Ca1	46736501	46736700	1.60168e-16	47.1462		Ca1	9979901	9980000	1.6422e-10	21.0966
Ca1	8963301	8963400	3.55127e-10	34.73		Ca1	47599301	47599400	5.93489e-10	25.7317		Ca1	10188001	10188100	4.82197e-09	30.4736
Ca1	8994151	8994300	1.26552e-17	43.2616		Ca1	48303401	48303550	2.26792e-07	30.2288		Ca1	10519301	10519400	1.2337e-05	19.9507
Ca1	8994501	8994650	0.000254648	25.0522		Ca2	653501	653600	3.10791e-12	42.9167		Ca1	10545101	10545250	6.56683e-06	16.2619
Ca1	9595201	9595300	4.82332e-20	45.3753		Ca2	1525251	1525350	6.38154e-11	25.7447		Ca1	10910201	10910300	8.76873e-07	17.2657
Ca1	9602051	9602150	2.83308e-29	65.9341		Ca2	4892951	4893100	5.14715e-27	41.1585		Ca1	10984101	10984200	1.11222e-06	15.1624
Ca1	9881301	9881400	5.0824e-12	27.0878		Ca2	5230701	5230800	5.21528e-08	28.5182		Ca1	11204751	11204900	1.59753e-08	28.4985
Ca1	10111801	10111900	1.33715e-28	75.7311		Ca2	5978201	5978300	5.21337e-06	25.3384		Ca1	11772001	11772100	3.53741e-08	15.4696
Ca1	10113201	10113300	1.08328e-22	28.0057		Ca2	6237651	6237800	1.5187e-11	30.0253		Ca1	11958401	11958600	2.80607e-15	28.4274
Ca1	10156301	10156400	3.56471e-20	31.2583		Ca2	6244401	6244500	7.74923e-12	29.3396		Ca1	12464101	12464200	1.64689e-07	25.0478
Ca1	10336801	10336950	2.38246e-37	65.1042		Ca2	6244701	6244800	5.27086e-13	27.7835		Ca1	12628501	12628600	2.39229e-06	20.8347
Ca1	10628701	10628800	1.93097e-14	32.3		Ca2	8457401	8457500	8.03941e-06	27.2108		Ca1	12720351	12720450	1.95906e-10	26.4668
Ca1	10888151	10888250	7.85341e-10	26.1893		Ca2	10537751	10537850	4.95965e-12	39.9257		Ca1	12961551	12961700	5.10984e-08	19.6374
Ca1	11084851	11084950	7.15326e-17	33.4967		Ca2	12768201	12768350	2.38302e-18	35.6742		Ca1	13139451	13139600	1.13872e-06	25.5556
Ca1	11328701	11328850	1.0565e-10	30.8728		Ca2	14506501	14506650	6.1294e-07	32.9081		Ca1	13230551	13230700	1.96614e-05	29.9491
Ca1	11402701	11402850	1.98316e-18	34.0775		Ca2	17869351	17869500	4.24213e-26	38.578		Ca1	13230851	13230950	2.78659e-05	23.4194
Ca1	11496301	11496400	3.15449e-15	30.6543		Ca2	17874901	17875100	5.43205e-13	27.492		Ca1	13277651	13277750	6.05594e-06	16.4425
Ca1	12783801	12783900	1.76821e-19	37.5051		Ca2	18440251	18440350	7.70135e-12	39.8974		Ca1	13317251	13317350	1.17438e-06	19.4234
Ca1	13375901	13376000	4.71908e-14	27.5845		Ca2	22702551	22702700	8.40845e-42	35.2797		Ca1	13361701	13361850	3.85126e-08	18.4978
Ca1	13404601	13404700	6.87678e-12	28.4268		Ca2	23297251	23297350	7.74292e-32	45.7148		Ca1	13464001	13464100	1.30709e-09	16.1639
Ca1	13549201	13549300	2.09781e-12	28.4003		Ca2	23297451	23297550	2.78474e-10	29.7666		Ca1	13531201	13531300	3.76553e-06	32.1584
Ca1	13781201	13781350	8.44701e-12	30.4552		Ca2	23416951	23417050	5.61647e-07	28.7642		Ca1	13634051	13634150	8.67745e-07	16.3601
Ca1	13784051	13784200	7.19937e-29	49.8893		Ca2	23417301	23417450	3.30261e-11	27.1841		Ca1	13748751	13748850	8.892e-07	17.62
Ca1	13829701	13829850	2.48789e-27	61.6073		Ca2	24621051	24621150	3.13743e-07	26.5537		Ca1	13903251	13903350	2.56809e-05	16.1643
Ca1	13844401	13844550	5.62642e-22	31.5019		Ca2	27211801	27211900	1.87156e-14	40.1574		Ca1	14171201	14171300	1.67067e-05	25.378
Ca1	13999801	13999900	3.2488e-14	34.7542		Ca2	30131851	30131950	2.0498e-13	30.4773		Ca1	14245601	14245750	8.00273e-06	22.7089
Ca1	14198801	14198900	2.65629e-28	35.9749		Ca2	31189251	31189400	3.09038e-11	36.0007		Ca1	14517851	14518000	4.06952e-10	21.3173
Ca1	14273251	14273350	8.87077e-17	32.9337		Ca2	31574001	31574100	5.37714e-09	27.3058		Ca1	14591101	14591200	6.87557e-06	24.6114
Ca1	15070651	15070750	9.11874e-25	56.157		Ca2	31962801	31962950	1.9311e-14	30.5947		Ca1	14632901	14633000	1.06923e-05	15.4565
Ca1	15215551	15215650	8.20576e-13	36.3499		Ca2	32347651	32347750	7.11565e-11	30.8539		Ca1	14785201	14785300	2.27968e-06	16.0911
Ca1	16161751	16161850	5.31338e-14	31.1594		Ca2	34710651	34710750	8.90752e-06	26.195		Ca1	14966701	14966800	2.84267e-06	23.7633
Ca1	16467251	16467350	3.17773e-18	40.1161		Ca3	1776551	1776650	3.83511e-06	32.8602		Ca1	14977451	14977550	1.05009e-08	23.1268
Ca1	16679251	16679350	2.68787e-21	25.1659		Ca3	2931451	2931650	3.10071e-15	27.1996		Ca1	14998451	14998550	1.14461e-05	23.1246
Ca1	16744101	16744200	3.03151e-07	25.0683		Ca3	3116051	3116150	5.20116e-13	33.8506		Ca1	15181101	15181200	1.38951e-07	19.0476
Ca1	17799501	17799600	2.33792e-30	30.4137		Ca3	4641451	4641550	1.60084e-09	28.1789		Ca1	15408901	15409000	2.06187e-09	24.3463
Ca1	17840451	17840600	1.15966e-19	41.5911		Ca3	5650251	5650350	4.23939e-13	35.9359		Ca1	15475751	15475850	2.13707e-05	15.5421
Ca1	17867501	17867600	6.28356e-09	27.1191		Ca3	6367101	6367250	2.61463e-25	52.5297		Ca1	15525051	15525200	2.25987e-07	18.8722
Ca1	18013851	18013950	3.75581e-08	28.4038		Ca3	6642951	6643050	6.45657e-05	25.7772		Ca1	15594501	15594600	2.44811e-05	15.1774
Ca1	18018001	18018100	2.1825e-18	34.9174		Ca3	9116351	9116450	3.90321e-13	25.6701		Ca1	15697101	15697200	1.53594e-06	21.8212
Ca1	18099451	18099550	4.81627e-19	32.9618		Ca3	12144451	12144550	2.34135e-16	26.2145		Ca1	15749651	15749750	3.10779e-05	18.8272
Ca1	18115701	18115850	7.27383e-09	26.4239		Ca3	14434701	14434850	1.72419e-74	71.9287		Ca1	16218351	16218500	2.53655e-05	17.6592
Ca1	18200101	18200200	2.87761e-18	37.2735		Ca3	14459501	14459600	1.86098e-36	44.3762		Ca1	16729151	16729250	2.88439e-05	22.1626
Ca1	18980901	18981050	1.43174e-18	40.9522		Ca3	14459651	14459750	1.13592e-34	65.6375		Ca1	16754601	16754700	2.84694e-06	23.1548
Ca1	19399451	19399550	3.95404e-22	34.4081		Ca3	14459751	14459900	4.18811e-24	44.5482		Ca1	16766401	16766500	1.85294e-06	19.0893
Ca1	19601201	19601300	5.50095e-32	38.0783		Ca3	14459851	14460000	3.66951e-13	33.1882		Ca1	16781301	16781450	1.80257e-07	19.0067
Ca1	19763251	19763350	3.20812e-20	39.7811		Ca3	14459951	14460100	4.69248e-23	38.7782		Ca1	16818501	16818600	3.44442e-08	21.3485
Ca1	19801151	19801250	2.49835e-21	25.3487		Ca3	15185551	15185700	3.2137e-21	38.394		Ca1	16852151	16852250	9.68991e-08	18.8696
Ca1	19806651	19806750	5.11865e-06	25.8477		Ca3	15936651	15936800	8.94554e-08	33.2155		Ca1	16958851	16958950	1.75743e-05	20.36
Ca1	19827451	19827600	2.03615e-24	47.8106		Ca3	15936751	15936950	1.17448e-29	55.7276		Ca1	17196201	17196300	6.42635e-08	38.5072
Ca1	20590901	20591000	2.33318e-14	25.7986		Ca3	15937051	15937150	1.03343e-50	62.853		Ca1	17592901	17593050	1.48103e-11	34.1173
Ca1	20826101	20826200	6.12501e-38	36.8932		Ca3	15968601	15968750	7.5025e-15	35.4819		Ca1	17728301	17728400	8.31657e-12	18.1591
Ca1	20884201	20884300	2.26389e-10	28.7936		Ca3	16926351	16926500	5.95628e-12	28.5266		Ca1	17868451	17868550	3.18151e-07	18.1206
Ca1	21159801	21159950	7.56331e-08	33.1904		Ca3	18969701	18969850	2.09411e-09	31.7729		Ca1	18178801	18178900	2.32304e-13	36.6947
Ca1	22367001	22367100	4.34393e-13	32.9264		Ca3	19149251	19149350	1.6306e-07	29.4459		Ca1	18286851	18286950	1.58976e-05	16.2974
Ca1	23174051	23174150	2.62704e-07	36.8578		Ca3	19580201	19580350	4.91975e-08	30.7411		Ca1	18518101	18518250	4.33938e-09	16.3863
Ca1	23608701	23608850	2.44211e-11	39.1619		Ca3	21270451	21270600	1.461e-14	38.108		Ca1	18959001	18959100	8.12893e-07	16.0061
Ca1	23948751	23948900	2.39038e-12	40.6037		Ca3	21270601	21270750	1.58901e-16	32.3084		Ca1	19324451	19324550	8.81327e-06	18.511
Ca1	24481701	24481800	3.81573e-10	25.1519		Ca3	21744301	21744400	3.86043e-24	28.6505		Ca1	19594401	19594500	1.3047e-05	20.7207
Ca1	24555401	24555500	3.16964e-48	26.4216		Ca3	22102901	22103000	2.94663e-08	34.2033		Ca1	20105901	20106000	3.06947e-05	31.4935
Ca1	25043551	25043650	3.95444e-11	30.8663		Ca3	24260951	24261050	2.65195e-08	31.0235		Ca1	20288151	20288250	1.00525e-05	16.9992
Ca1	26008101	26008250	5.83186e-11	37.7556		Ca3	27275551	27275650	3.81418e-10	41.2036		Ca1	20447751	20447850	1.55397e-08	21.5529
Ca1	26130101	26130250	2.66753e-65	42.3573		Ca3	32502051	32502200	1.52919e-10	40.9563		Ca1	20449301	20449400	1.86053e-05	20.0101
Ca1	26643501	26643650	3.66619e-13	34.8616		Ca3	32944501	32944650	2.43007e-10	45.4668		Ca1	20574401	20574550	8.2252e-11	32.7461
Ca1	26994351	26994450	4.52712e-11	35.7787		Ca3	32944601	32944750	2.86176e-33	55.0592		Ca1	20837851	20837950	2.95699e-05	22.2845
Ca1	28343501	28343600	1.86868e-12	34.0568		Ca3	33456401	33456550	4.28969e-09	42.7179		Ca1	21120101	21120200	6.20214e-10	20.9285
Ca1	28344001	28344100	1.00455e-20	45.4402		Ca3	33723551	33723650	5.03638e-05	27.1505		Ca1	21125201	21125300	1.89302e-08	21.9048
Ca1	28656801	28656900	4.55126e-09	36.4112		Ca3	39248801	39248900	2.88959e-07	30.8648		Ca1	21146051	21146150	1.45103e-08	17.384
Ca1	29227151	29227250	1.71073e-09	25.5411		Ca4	1217051	1217150	2.42988e-11	28.3638		Ca1	21175351	21175450	1.30148e-07	17.9565
Ca1	30442651	30442750	1.11982e-23	26.368		Ca4	1806251	1806350	4.20662e-11	28.3503		Ca1	21265001	21265100	2.9691e-05	19.9301
Ca1	31333901	31334050	1.22188e-18	38.9684		Ca4	2311051	2311150	3.67513e-05	25.8616		Ca1	22084851	22085000	1.38642e-05	16.2555
Ca1	32258551	32258650	5.77096e-18	53.1733		Ca4	2311701	2311850	6.14896e-13	33.9547		Ca1	22102651	22102750	4.34019e-11	24.2309
Ca1	32792301	32792450	3.64861e-24	58.6426		Ca4	2417051	2417150	2.81428e-08	27.1182		Ca1	22120351	22120500	8.63096e-06	22.7373
Ca1	33058101	33058200	3.92615e-06	26.2668		Ca4	4818151	4818250	1.33223e-09	31.4097		Ca1	22278151	22278250	2.10763e-07	21.7974
Ca1	33161051	33161150	1.01624e-07	28.3609		Ca4	4966501	4966650	3.25044e-25	45.5725		Ca1	22667701	22667800	9.46864e-07	25.7466
Ca1	33324551	33324650	1.8199e-20	36.0347		Ca4	4966601	4966750	6.38041e-72	62.2401		Ca1	22682101	22682200	1.04557e-05	17.4963
Ca1	34282601	34282700	3.18061e-07	29.5833		Ca4	5218751	5218850	2.54644e-06	25.5856		Ca1	25283901	25284000	2.17969e-07	28.3925
Ca1	34334351	34334450	1.54906e-11	34.134		Ca4	5486051	5486200	3.56996e-11	28.9301		Ca1	26857501	26857600	1.25959e-05	16.4085
Ca1	34371301	34371400	5.19917e-16	40.2029		Ca4	8267501	8267600	2.37287e-18	29.6769		Ca1	26883801	26883950	3.14345e-11	28.2291
Ca1	34724601	34724700	6.5436e-17	28.0306		Ca4	9255401	9255550	3.08094e-07	29.6932		Ca1	26966301	26966400	2.48356e-06	26.573
Ca1	34951951	34952050	3.40845e-16	30.7846		Ca4	10293951	10294100	9.19359e-12	31.7182		Ca1	28366551	28366650	3.08594e-08	22.2699
Ca1	34980251	34980350	1.13547e-09	30.6916		Ca4	12514601	12514750	3.42969e-09	31.7611		Ca1	28692251	28692350	2.7639e-06	16.9672
Ca1	35455701	35455850	8.01225e-15	32.9501		Ca4	14064301	14064400	2.28626e-40	89.1226		Ca1	29171651	29171750	2.37462e-07	18.1984
Ca1	35518351	35518550	2.59149e-16	52.6406		Ca4	14184151	14184300	3.21242e-09	39.3223		Ca1	29226951	29227050	4.58972e-06	26.8406
Ca1	38682301	38682400	3.47612e-10	27.3845		Ca4	20227751	20227900	3.14893e-17	43.9824		Ca1	31094201	31094300	7.11337e-06	18.9474
Ca1	39115201	39115300	5.48766e-15	51.8939		Ca4	21107151	21107250	1.75165e-12	33.5015		Ca1	31451251	31451450	2.92026e-09	27.9638
Ca1	39443451	39443550	8.10942e-18	33.433		Ca4	21108751	21108850	2.22052e-20	40.3941		Ca1	33598201	33598300	1.16442e-05	16.0279
Ca1	39586651	39586750	2.66098e-28	57.8469		Ca4	21111101	21111200	3.50586e-10	25.6638		Ca1	33646601	33646750	2.57953e-05	17.3612
Ca1	39722451	39722600	2.80881e-08	29.2823		Ca4	21619151	21619250	1.16454e-05	26.1357		Ca1	34477901	34478000	1.32778e-07	15.2971
Ca1	41036801	41036950	2.5754e-08	25.4407		Ca4	21939601	21939700	7.84417e-12	34.9581		Ca1	34686851	34686950	1.2606e-05	20.1681
Ca1	41054001	41054100	2.22741e-21	31.6746		Ca4	23321701	23321800	8.91301e-11	27.4396		Ca1	34900401	34900500	2.33281e-07	17.9707
Ca1	41184251	41184350	3.92743e-09	39.7475		Ca4	24729251	24729350	6.08412e-10	29.1962		Ca1	35101001	35101100	1.11906e-05	17.4359
Ca1	41311301	41311400	7.40385e-09	35.4287		Ca4	25814851	25814950	3.29422e-19	34.0909		Ca1	35581101	35581200	1.32667e-05	15.8323
Ca1	42317251	42317350	1.33773e-07	27.8788		Ca4	25815001	25815100	2.50199e-12	30.8049		Ca1	35988701	35988850	6.53843e-07	21.7281
Ca1	42450251	42450350	3.42174e-12	29.686		Ca4	26221001	26221100	1.38716e-07	25.6903		Ca1	37529751	37529850	1.10645e-05	15.2718
Ca1	43429951	43430100	5.47072e-08	27.6849		Ca4	26225901	26226000	6.19423e-14	31.2929		Ca1	37679951	37680050	4.35505e-09	23.9176
Ca1	43532251	43532400	2.34414e-40	36.5914		Ca4	28526801	28526900	1.16814e-11	35.4133		Ca1	38137301	38137400	2.88012e-08	23.9316
Ca1	43541001	43541150	1.82473e-18	39.9176		Ca4	29929351	29929450	2.6569e-12	42.9093		Ca1	38235751	38235850	4.3025e-06	19.6444
Ca1	44152851	44152950	7.50632e-06	25.7241		Ca4	30052801	30053000	3.91461e-12	42.7393		Ca1	39347051	39347150	2.5252e-06	15.4772
Ca1	46056251	46056350	6.9761e-15	26.9796		Ca4	30053201	30053350	5.5196e-21	55.9161		Ca1	39379201	39379300	2.28634e-07	15.1187
Ca1	46526951	46527100	2.26206e-30	46.8494		Ca4	32501601	32501750	2.85435e-11	35.5592		Ca1	39431451	39431550	1.25594e-06	17.9
Ca1	46527101	46527200	2.02264e-24	43.1251		Ca4	33489101	33489200	1.40732e-09	36.0735		Ca1	39658801	39658900	1.91998e-09	21.9437
Ca1	46531051	46531200	7.95348e-12	27.6083		Ca4	33489301	33489400	2.33434e-08	29.1457		Ca1	39994001	39994100	3.7566e-06	16.7277
Ca1	46534751	46534850	1.83581e-29	31.086		Ca4	33606251	33606450	3.61603e-18	46.6851		Ca1	40047301	40047450	9.59677e-08	17.5906
Ca1	48226751	48226850	1.00482e-16	58.7302		Ca4	34483901	34484000	2.83405e-10	25.7941		Ca1	40575801	40575900	2.44332e-06	24.9668
Ca1	48264351	48264450	1.47214e-07	30		Ca4	35982301	35982400	9.50773e-18	29.5759		Ca1	40601901	40602000	4.34966e-06	18.7669
Ca1	184601	184700	1.03659e-07	-30.7692		Ca4	35982501	35982700	5.779e-14	30.0632		Ca1	40668001	40668100	3.04129e-09	15.8434
Ca1	607001	607100	4.41259e-45	-75.3145		Ca4	35982951	35983150	6.46881e-09	35.8123		Ca1	41000951	41001050	2.6771e-08	24.5866
Ca1	678501	678600	1.21708e-09	-26.464		Ca4	36525601	36525700	7.08365e-06	27.5503		Ca1	41174801	41174900	1.73092e-07	19.7546
Ca1	686251	686350	3.95166e-60	-69.0484		Ca4	38659201	38659300	7.05023e-10	27.6534		Ca1	41237351	41237450	9.36071e-08	23.2357
Ca1	710301	710400	6.33752e-10	-26.9382		Ca4	39061801	39061900	1.43785e-16	34.7846		Ca1	41529651	41529750	3.19417e-09	17.8909
Ca1	718301	718400	9.08437e-11	-30.1166		Ca4	41159951	41160100	4.48936e-26	60.313		Ca1	41529801	41529900	2.50201e-06	17.4916
Ca1	722801	722900	4.5102e-25	-38.9399		Ca4	41915901	41916000	1.86674e-05	31.1741		Ca1	41559651	41559750	2.71705e-05	21.93
Ca1	779351	779450	5.9574e-10	-27.1228		Ca4	41932301	41932400	9.6595e-06	29.0165		Ca1	41632401	41632550	7.34581e-12	28.8854
Ca1	779501	779650	3.63736e-18	-33.3871		Ca4	42245351	42245450	6.00023e-15	28.9752		Ca1	43171501	43171600	2.8463e-07	20.9841
Ca1	1035151	1035250	2.66828e-35	-51.5734		Ca4	42245701	42245850	8.41529e-19	36.4761		Ca1	43338001	43338150	4.59656e-14	19.6028
Ca1	1077751	1077900	8.65698e-10	-28.9483		Ca4	43327151	43327300	2.80043e-07	27.5825		Ca1	43360501	43360600	2.10463e-05	22.2047
Ca1	1249051	1249200	4.30381e-51	-51.6201		Ca4	43571851	43571950	4.12426e-07	33.2265		Ca1	43548401	43548500	8.20123e-06	22.1905
Ca1	1250501	1250600	7.12523e-24	-44.8203		Ca4	44295051	44295200	4.36564e-15	27.5559		Ca1	43611451	43611550	6.67651e-11	15.3706
Ca1	1343051	1343150	6.44018e-23	-40.6046		Ca4	49071251	49071450	3.00551e-07	29.9801		Ca1	46514151	46514250	3.45271e-08	18.9996
Ca1	1420501	1420600	2.06639e-18	-26.4631		Ca4	49082301	49082400	8.53121e-11	26.6863		Ca1	46744801	46745000	4.31123e-08	19.1713
Ca1	1528501	1528600	2.44378e-40	-46.5624		Ca4	49082551	49082650	1.27896e-13	29.2481		Ca1	47138201	47138300	1.43846e-08	22.8354
Ca1	1604551	1604700	2.38321e-20	-38.3799		Ca5	344501	344600	7.88558e-14	33.75		Ca1	47185801	47185900	3.11297e-07	26.0204
Ca1	1865501	1865700	1.99979e-09	-39.9257		Ca5	367151	367250	4.96362e-09	36.1626		Ca1	47433901	47434000	5.25424e-06	20.9524
Ca1	1866351	1866450	1.10941e-11	-29.7058		Ca5	1226701	1226800	2.18299e-13	29.7634		Ca1	47843851	47843950	1.26793e-06	24.4036
Ca1	2041901	2042000	2.05946e-09	-32.6248		Ca5	2155351	2155450	9.38945e-09	33.0345		Ca1	47931301	47931400	1.16094e-05	23.4409
Ca1	2053001	2053150	9.30772e-14	-34.1689		Ca5	2183501	2183650	9.45321e-10	28.8737		Ca1	47963051	47963150	2.07183e-05	18.4974
Ca1	2174251	2174350	5.96125e-29	-43.8965		Ca5	2183601	2183750	8.70837e-12	31.4878		Ca1	48096851	48096950	1.01411e-05	15.8448
Ca1	2376551	2376750	1.23034e-25	-47.0173		Ca5	2184351	2184450	5.38429e-10	27.8772		Ca1	48170751	48170850	1.01179e-07	21.5503
Ca1	2458251	2458350	3.95372e-15	-32.5798		Ca5	2185651	2185750	3.81618e-10	27.3196		Ca1	48172901	48173000	3.49037e-06	19.8528
Ca1	2458751	2458850	2.97334e-13	-30.7822		Ca5	2940701	2940850	6.09864e-10	25.2566		Ca1	48223051	48223150	5.35255e-06	21.4788
Ca1	2888051	2888150	7.71959e-22	-33.3852		Ca5	2940851	2940950	8.96489e-11	37.2601		Ca1	202501	202600	7.35482e-07	-28.4859
Ca1	2990901	2991050	1.43057e-55	-74.4752		Ca5	2941451	2941550	3.71681e-06	30.364		Ca1	233051	233150	2.74728e-05	-24.5327
Ca1	3258001	3258100	2.73162e-13	-27.82		Ca5	3004551	3004650	2.88757e-13	41.1057		Ca1	650701	650800	1.21452e-05	-30.9565
Ca1	3704401	3704500	3.04513e-23	-53.2597		Ca5	5098751	5098850	1.24446e-10	35.1293		Ca1	900901	901050	5.28879e-09	-16.592
Ca1	3884701	3884850	5.11293e-21	-35.5372		Ca5	5098851	5098950	6.33373e-08	30.3212		Ca1	945201	945300	8.25993e-09	-16.4172
Ca1	4202901	4203000	3.96527e-07	-32.0405		Ca5	5357051	5357200	8.73822e-38	65.4095		Ca1	1153951	1154050	1.07925e-06	-32.0211
Ca1	4291601	4291750	1.31164e-10	-34.5201		Ca5	5357301	5357450	1.53962e-27	71.6268		Ca1	1199901	1200000	1.15481e-07	-24.0112
Ca1	4397651	4397750	2.51131e-44	-60.4751		Ca5	6287301	6287400	1.32134e-07	26.6799		Ca1	1245651	1245750	1.02055e-05	-15.7383
Ca1	4456801	4456900	6.83423e-15	-30.9554		Ca5	6302101	6302200	2.31313e-08	28.0588		Ca1	1323201	1323300	7.06563e-07	-27.72
Ca1	4475851	4476000	1.19723e-11	-34.0898		Ca5	6366951	6367050	4.68113e-10	33.0131		Ca1	1687051	1687150	1.00586e-06	-15.7355
Ca1	4508151	4508250	1.26265e-10	-25.3104		Ca5	6367201	6367300	2.50899e-11	28.5773		Ca1	1710551	1710650	2.93943e-05	-20.7414
Ca1	4645151	4645300	2.56177e-41	-76.7432		Ca5	6367301	6367450	1.37625e-11	37.889		Ca1	2643651	2643800	1.13612e-07	-18.3247
Ca1	4673301	4673400	8.58751e-09	-33.0038		Ca5	6386951	6387050	3.88311e-18	29.9952		Ca1	2644001	2644100	1.57785e-06	-17.6114
Ca1	4766601	4766750	1.81483e-31	-40.432		Ca5	6387301	6387450	1.68944e-09	41.1458		Ca1	2793451	2793600	4.79259e-07	-19.1425
Ca1	4782301	4782400	1.32659e-07	-27.3518		Ca5	6387501	6387600	4.84059e-17	43.4704		Ca1	3209251	3209350	2.12449e-05	-21.9432
Ca1	4950651	4950750	1.59642e-10	-25.5246		Ca5	7496451	7496600	1.11811e-11	34.0304		Ca1	3452101	3452200	1.05743e-10	-19.9626
Ca1	4996751	4996850	4.95206e-13	-30.8798		Ca5	7658501	7658600	4.67324e-39	54.695		Ca1	3831251	3831350	2.62187e-09	-18.5603
Ca1	5005701	5005800	3.5687e-31	-33.4683		Ca5	7777151	7777250	2.56312e-05	25.0712		Ca1	4055201	4055300	8.4202e-06	-17.8992
Ca1	5147151	5147250	2.85501e-11	-33.4184		Ca5	7791301	7791400	3.82563e-09	25.0135		Ca1	4079001	4079100	1.71732e-05	-25.8937
Ca1	5173351	5173500	7.31667e-20	-53.7537		Ca5	7794701	7794850	6.6579e-16	30.0322		Ca1	4119601	4119700	4.8819e-07	-20.3771
Ca1	5262701	5262800	1.0096e-14	-40.9422		Ca5	8160801	8160900	7.42285e-09	29.9367		Ca1	4452101	4452200	1.58481e-09	-19.7661
Ca1	5475351	5475450	8.70269e-11	-31.0525		Ca5	8489951	8490050	9.41936e-06	25.0112		Ca1	5049401	5049600	6.23869e-13	-22.6451
Ca1	5744401	5744550	2.18884e-27	-65.9054		Ca5	9113101	9113200	1.5958e-14	51.8736		Ca1	5049601	5049700	6.81738e-09	-20.7371
Ca1	5790651	5790750	1.74828e-05	-26.1728		Ca5	9214701	9214850	2.33374e-24	37.7903		Ca1	5121551	5121700	3.03085e-05	-18.0981
Ca1	5919801	5919950	2.34803e-14	-38.8756		Ca5	9214851	9214950	1.66367e-07	26.6841		Ca1	5173451	5173550	3.59142e-07	-17.5603
Ca1	6230101	6230250	1.51095e-24	-41.3235		Ca5	9256701	9256900	1.23208e-24	35.0695		Ca1	5266601	5266700	8.16847e-07	-21.3993
Ca1	6238301	6238400	3.60213e-10	-32.0313		Ca5	9377201	9377300	2.16662e-11	36.7571		Ca1	5520401	5520500	3.26169e-09	-25.1212
Ca1	6262951	6263050	1.05177e-18	-30.1689		Ca5	10906951	10907050	1.08718e-17	26.7916		Ca1	5548951	5549100	4.67688e-18	-27.2998
Ca1	6269401	6269550	8.23868e-20	-54.6885		Ca5	10907151	10907350	2.49486e-14	34.5251		Ca1	5627151	5627250	2.46511e-05	-16.8054
Ca1	6303751	6303850	4.31296e-119	-92.8005		Ca5	10917201	10917300	2.07464e-18	25.1819		Ca1	5744351	5744500	1.79774e-09	-21.4834
Ca1	6516701	6516900	1.06541e-11	-68.4199		Ca5	10917851	10917950	9.24655e-08	26.5903		Ca1	5945051	5945150	8.40022e-10	-21.7003
Ca1	6520951	6521050	6.86024e-23	-55.0541		Ca5	10921751	10921850	2.0883e-08	29.2888		Ca1	6138451	6138550	4.32314e-07	-19.2888
Ca1	6586451	6586550	9.57614e-10	-28.3303		Ca5	10924551	10924700	1.90929e-29	26.0736		Ca1	6159801	6159900	1.29139e-10	-23.7212
Ca1	6592251	6592400	2.68369e-22	-43.5429		Ca5	11995251	11995350	4.83388e-11	40.2621		Ca1	6174351	6174450	1.26284e-28	-19.2672
Ca1	6592701	6592800	9.89975e-16	-39.1276		Ca5	12201901	12202000	4.62026e-07	31.7131		Ca1	6360651	6360750	2.9421e-09	-27.7504
Ca1	6677651	6677750	9.74824e-12	-32.4762		Ca5	12385301	12385450	3.73997e-35	59.6372		Ca1	6371001	6371100	2.10449e-08	-26.2407
Ca1	6682901	6683000	6.25799e-13	-41.4966		Ca5	12617101	12617200	4.79238e-12	45.3539		Ca1	6425001	6425100	5.54136e-06	-15.8507
Ca1	6706701	6706800	3.97698e-19	-34.3682		Ca5	12629951	12630100	9.71741e-11	37.9795		Ca1	6432251	6432350	2.30157e-05	-17.4048
Ca1	6734601	6734700	9.5797e-18	-27.3007		Ca5	12631451	12631650	5.66029e-18	44.1093		Ca1	7539151	7539250	9.85367e-06	-18.6516
Ca1	6753951	6754050	3.26928e-37	-67.9084		Ca5	12637001	12637150	1.1378e-10	37.8326		Ca1	7548151	7548250	9.97952e-09	-15.0488
Ca1	6758601	6758750	3.87213e-48	-94.4723		Ca5	12637101	12637250	6.75047e-09	30.6452		Ca1	7606601	7606700	1.72858e-08	-17.3775
Ca1	6758751	6758850	5.06297e-23	-63.3831		Ca5	12637301	12637400	1.25711e-05	30.6061		Ca1	7713101	7713200	2.95301e-06	-18.4615
Ca1	6818451	6818550	9.01218e-14	-35.6145		Ca5	12837101	12837250	6.82221e-09	28.1394		Ca1	8077251	8077350	2.40575e-05	-19.95
Ca1	6873051	6873200	2.16822e-45	-66.7625		Ca5	12837251	12837400	1.13068e-10	29.7407		Ca1	8241151	8241250	1.41178e-07	-15.8547
Ca1	6879501	6879600	3.68985e-09	-29.1386		Ca5	12837651	12837750	3.14695e-19	25.762		Ca1	8322551	8322650	2.38354e-08	-17.9519
Ca1	6879801	6879950	4.18437e-12	-28.1533		Ca5	12841801	12841900	6.84789e-15	46.8883		Ca1	9222401	9222550	3.51807e-09	-33.305
Ca1	6930851	6930950	2.89015e-19	-34.61		Ca5	12841901	12842050	1.70917e-28	42.2942		Ca1	9262601	9262750	7.1915e-07	-25.6807
Ca1	6931401	6931500	7.32795e-34	-34.6679		Ca5	12842001	12842150	1.01818e-27	43.66		Ca1	9440451	9440600	1.86141e-11	-23.439
Ca1	6935351	6935500	1.0062e-20	-36.7892		Ca5	12842401	12842600	1.11483e-07	41.7073		Ca1	9440551	9440700	1.57298e-40	-27.942
Ca1	7186551	7186650	1.32065e-19	-41.2227		Ca5	12997851	12997950	2.44514e-05	25.5631		Ca1	9479451	9479550	8.53683e-13	-15.9841
Ca1	7188751	7188850	4.06518e-13	-35.9874		Ca5	13023701	13023850	2.23293e-16	50.7213		Ca1	9684451	9684550	1.06577e-05	-24.7826
Ca1	7225051	7225150	5.23398e-11	-32.2785		Ca5	13074851	13074950	8.65962e-06	27.9205		Ca1	9908701	9908850	1.18132e-05	-18.4895
Ca1	7329951	7330100	8.85497e-13	-34.9268		Ca5	13075001	13075100	1.70383e-07	34.4372		Ca1	10071901	10072000	1.01115e-05	-16.1067
Ca1	7515251	7515350	1.51862e-22	-32.573		Ca5	13075451	13075600	1.23762e-17	30.9553		Ca1	10095601	10095700	6.10725e-08	-25.8775
Ca1	7515401	7515500	1.29887e-16	-35.9978		Ca5	13077251	13077350	5.47411e-10	26.6623		Ca1	10121101	10121200	1.22649e-05	-15.5674
Ca1	8217601	8217700	1.76559e-24	-51.2521		Ca5	13128501	13128600	2.3169e-07	33.5658		Ca1	10353551	10353650	3.28462e-07	-15.264
Ca1	8283851	8283950	5.80815e-09	-25.033		Ca5	13145351	13145450	2.9851e-06	32.847		Ca1	10414951	10415050	4.9162e-14	-16.1668
Ca1	8284201	8284350	2.2755e-40	-67.1642		Ca5	16036351	16036500	1.08551e-05	25.9943		Ca1	10874951	10875050	4.11022e-08	-23.186
Ca1	8284301	8284450	1.79704e-89	-77.0893		Ca5	16348201	16348350	5.73917e-14	32.6757		Ca1	11234251	11234350	1.99707e-05	-15.169
Ca1	8395501	8395650	1.07622e-09	-30.8312		Ca5	16367851	16367950	5.25483e-41	51.8598		Ca1	11695951	11696050	2.36941e-06	-17.5123
Ca1	8474201	8474300	2.41686e-05	-26.8637		Ca5	16377451	16377550	9.15177e-26	61.5373		Ca1	11713151	11713250	1.39843e-08	-20.147
Ca1	8480451	8480550	3.25785e-57	-35.9699		Ca5	16933501	16933600	1.42326e-05	27.8562		Ca1	11863801	11863900	2.52556e-06	-17.4208
Ca1	8678501	8678600	4.15687e-63	-87.1288		Ca5	18155101	18155250	1.54594e-07	29.1048		Ca1	11895901	11896000	2.52609e-05	-15.3909
Ca1	8820001	8820150	4.85891e-16	-31.5242		Ca5	18352051	18352150	6.3603e-09	27.6952		Ca1	12138901	12139000	3.47041e-06	-15.7143
Ca1	8891551	8891650	1.8513e-07	-31.5528		Ca5	18356501	18356600	7.7541e-18	37.9868		Ca1	12177751	12177900	1.2537e-13	-25.045
Ca1	9250451	9250550	2.23037e-14	-41.1134		Ca5	18356651	18356750	6.86492e-16	48.2615		Ca1	12311101	12311200	4.56413e-06	-15.3296
Ca1	9374651	9374750	4.11106e-20	-28.5978		Ca5	18356751	18356850	1.88267e-06	25.7702		Ca1	12603701	12603800	1.31024e-05	-16.2862
Ca1	9489851	9489950	7.29085e-06	-27.551		Ca5	18357201	18357350	7.72868e-12	29.7835		Ca1	12750151	12750250	4.60596e-06	-18.5932
Ca1	9552601	9552700	5.9793e-07	-27.7291		Ca5	18357301	18357450	1.68568e-08	28.3556		Ca1	13106051	13106150	2.65677e-06	-16.0328
Ca1	9557551	9557650	7.15211e-33	-52.8526		Ca5	18363101	18363250	3.09982e-14	29.2009		Ca1	13107051	13107150	2.35454e-05	-22.0624
Ca1	9730701	9730800	3.93402e-18	-45.1019		Ca5	18363201	18363350	4.22278e-10	32.1726		Ca1	13392251	13392400	3.09276e-05	-28.7147
Ca1	9772801	9772900	4.45705e-18	-30.7156		Ca5	18363401	18363550	1.0656e-06	28.5401		Ca1	13400501	13400600	4.31944e-08	-16.8482
Ca1	10021201	10021300	6.02362e-11	-40.8931		Ca5	18376551	18376700	1.03137e-16	42.8349		Ca1	13471301	13471400	2.05835e-10	-21.1101
Ca1	10147901	10148050	3.55823e-05	-31.2453		Ca5	18376701	18376850	7.47042e-18	35.9802		Ca1	13587801	13587900	2.43664e-06	-16.998
Ca1	10224901	10225000	2.75008e-10	-27.7939		Ca5	18966801	18966900	1.38579e-10	26.6172		Ca1	14357601	14357700	2.42451e-07	-26.994
Ca1	10274201	10274300	9.24783e-13	-25.3731		Ca5	18967551	18967650	4.00035e-06	32.5163		Ca1	15078301	15078400	1.78459e-05	-17.3831
Ca1	10276301	10276400	5.96212e-23	-37.935		Ca5	18969601	18969700	1.87727e-12	29.8082		Ca1	15093401	15093500	7.75515e-10	-15.0271
Ca1	10319951	10320050	1.18277e-09	-32.1007		Ca5	19019851	19019950	4.77887e-06	28.8059		Ca1	15124101	15124200	1.24262e-06	-20.7809
Ca1	10415101	10415200	3.21011e-34	-56.4417		Ca5	19068051	19068150	6.0744e-07	30.2941		Ca1	15263751	15263850	8.60837e-06	-16.9053
Ca1	10540701	10540800	3.99249e-09	-25.2391		Ca5	19851001	19851100	6.72318e-08	25.1509		Ca1	15721201	15721300	1.32315e-06	-17.4743
Ca1	10629201	10629300	2.58807e-14	-32.42		Ca5	20173601	20173700	5.46911e-09	26.1842		Ca1	15852151	15852250	6.00434e-09	-17.8725
Ca1	10710501	10710600	1.8348e-15	-27.6578		Ca5	20357501	20357650	2.672e-36	65.4562		Ca1	16047201	16047300	1.26884e-05	-17.5775
Ca1	10718001	10718100	1.31826e-09	-25.1134		Ca5	20576001	20576100	3.20154e-21	53.6257		Ca1	16230651	16230800	3.34072e-07	-16.081
Ca1	10778551	10778650	1.19773e-10	-42.4742		Ca5	20952251	20952350	7.71122e-14	45.5963		Ca1	16288551	16288650	2.28873e-06	-16.5729
Ca1	10926501	10926650	1.73179e-16	-36.2837		Ca5	20952501	20952650	1.67645e-12	38.343		Ca1	16534501	16534600	1.89114e-09	-27.643
Ca1	10993501	10993650	1.77291e-19	-45.4749		Ca5	21038951	21039050	6.72477e-10	34.7884		Ca1	16957901	16958000	1.80176e-10	-30.8458
Ca1	11136001	11136100	1.25794e-18	-33.0435		Ca5	21057151	21057250	1.09505e-09	41.1376		Ca1	16991101	16991250	5.71531e-08	-15.5794
Ca1	11421951	11422050	3.75962e-09	-28.5183		Ca5	21196201	21196300	7.08537e-13	26.3552		Ca1	17098251	17098350	2.99264e-07	-19.8908
Ca1	11652951	11653050	8.36973e-18	-50.3056		Ca5	22947601	22947700	1.73291e-06	25.1187		Ca1	17592251	17592350	1.75437e-10	-20.1203
Ca1	11778301	11778400	6.50594e-71	-51.3132		Ca5	23177301	23177400	2.84081e-08	29.6519		Ca1	17840101	17840200	9.77647e-06	-24.7379
Ca1	12127251	12127400	4.91559e-17	-29.9395		Ca5	23876701	23876850	8.27779e-10	28.105		Ca1	17840201	17840350	9.41205e-06	-20.5321
Ca1	12293401	12293500	2.30774e-06	-28.1818		Ca5	24095851	24096050	2.12642e-08	28.9896		Ca1	18240301	18240400	3.49775e-06	-15.3271
Ca1	12305601	12305700	3.36261e-28	-26.9858		Ca5	24157551	24157650	1.98847e-08	34.552		Ca1	18795151	18795250	2.3206e-05	-18.1195
Ca1	12520501	12520600	1.13231e-17	-32.4132		Ca5	24563851	24563950	4.24818e-22	27.9481		Ca1	19065401	19065500	1.64088e-05	-21.5563
Ca1	12739201	12739300	4.22403e-14	-32.7513		Ca5	24640901	24641000	1.89261e-27	59.228		Ca1	19280051	19280150	1.91485e-10	-22.8309
Ca1	12784401	12784550	1.01538e-17	-33.3735		Ca5	25857251	25857350	4.99687e-08	25.7072		Ca1	19938651	19938750	9.03125e-13	-15.8621
Ca1	12899101	12899200	2.42534e-34	-66.3265		Ca5	25874051	25874150	1.44792e-14	40.4529		Ca1	20156501	20156600	8.3294e-06	-21.7663
Ca1	13046651	13046750	6.49875e-12	-32.248		Ca5	26318851	26319000	5.54593e-07	36.5435		Ca1	20554101	20554200	1.39698e-05	-16.7108
Ca1	13220401	13220500	1.70201e-18	-31.4302		Ca5	26605951	26606050	3.5749e-07	27.8155		Ca1	21407451	21407550	8.03932e-07	-22.0926
Ca1	13414601	13414700	2.38167e-22	-37.5779		Ca5	26696401	26696550	3.52864e-56	31.4799		Ca1	21685701	21685800	2.94696e-07	-18.4541
Ca1	13498401	13498550	7.17673e-11	-27.3281		Ca5	26696551	26696650	9.03487e-18	28.7399		Ca1	22183101	22183200	7.04012e-17	-39.3207
Ca1	13825901	13826000	2.75741e-16	-28.3878		Ca5	26704851	26705000	5.17557e-09	25.9915		Ca1	22197051	22197200	3.61359e-06	-22.4131
Ca1	13945301	13945400	1.61821e-17	-58.9286		Ca5	26957151	26957250	2.5983e-12	27.6037		Ca1	22448301	22448450	2.17131e-05	-19.548
Ca1	14182401	14182500	1.07202e-22	-55.7827		Ca5	26957351	26957450	1.0179e-13	26.5731		Ca1	22650301	22650400	2.48035e-06	-15.1808
Ca1	14393551	14393650	3.18309e-21	-46.9588		Ca5	26986501	26986600	5.62582e-12	32.6065		Ca1	22662451	22662550	7.16532e-06	-17.2513
Ca1	14487451	14487550	1.13614e-14	-27.1665		Ca5	27174401	27174500	7.6913e-10	28.8676		Ca1	23184751	23184850	1.23619e-06	-16.3058
Ca1	14487601	14487700	1.35378e-15	-27.7504		Ca5	28685851	28685950	1.19397e-08	25.1099		Ca1	23540651	23540750	2.58205e-05	-17.5882
Ca1	14489001	14489100	3.75996e-45	-39.6226		Ca5	29609401	29609500	9.49102e-11	26.5972		Ca1	23868751	23868850	7.70792e-09	-16.3509
Ca1	14587051	14587200	4.68736e-62	-67.8214		Ca5	29609501	29609600	1.11578e-19	38.8503		Ca1	23919801	23919900	3.15322e-05	-17.2947
Ca1	14690751	14690900	4.65627e-18	-38.2117		Ca5	29829401	29829500	4.6054e-05	27.5437		Ca1	24001051	24001150	2.30514e-05	-21.4429
Ca1	14749251	14749350	9.31057e-14	-34.2385		Ca5	29928101	29928200	3.06723e-09	32.735		Ca1	24077801	24077900	1.83113e-09	-20.7369
Ca1	14920701	14920850	9.77984e-22	-34.7317		Ca5	29967701	29967800	2.27215e-15	31.6803		Ca1	24531901	24532050	1.87854e-07	-15.8556
Ca1	14998751	14998900	3.48612e-09	-37.5357		Ca5	29967901	29968050	1.43582e-21	29.212		Ca1	24677451	24677550	6.11947e-06	-18.6559
Ca1	15199001	15199100	5.73195e-08	-33.388		Ca5	30056251	30056400	5.95964e-10	29.077		Ca1	24883351	24883450	2.76558e-06	-19.5058
Ca1	15252651	15252750	3.72822e-15	-45.8568		Ca5	30057451	30057600	6.28754e-24	37.9629		Ca1	25437951	25438050	4.60265e-07	-23.7577
Ca1	15291251	15291350	5.24353e-54	-78.2695		Ca5	30057551	30057700	1.27712e-13	28.6282		Ca1	25817801	25817900	2.28738e-15	-15.3061
Ca1	15642551	15642700	7.69971e-40	-72.0675		Ca5	30157601	30157700	9.17081e-08	33.1613		Ca1	26526051	26526200	2.37303e-05	-15.7164
Ca1	15642751	15642900	5.69082e-15	-36.1918		Ca5	30157701	30157800	5.43538e-08	25.6681		Ca1	26647451	26647550	1.64313e-05	-15.5574
Ca1	15790051	15790200	1.25054e-32	-31.8816		Ca5	30159701	30159850	3.44888e-09	38.158		Ca1	26652151	26652250	1.2155e-10	-27.9557
Ca1	16114751	16114850	5.18229e-10	-27.5599		Ca5	30160501	30160650	2.42469e-19	31.4336		Ca1	27002801	27002900	1.91341e-05	-15.8304
Ca1	16800551	16800650	4.7113e-21	-44.0906		Ca5	31352201	31352350	1.32811e-08	32.3579		Ca1	27177251	27177400	3.52771e-08	-19.8449
Ca1	16978951	16979050	1.25419e-10	-33.0214		Ca5	31837201	31837300	2.10595e-05	25.9544		Ca1	27253551	27253700	1.3649e-10	-18.5545
Ca1	17167751	17167900	1.52357e-82	-75.8086		Ca5	32061101	32061250	5.75046e-15	34.5799		Ca1	27474451	27474550	7.99423e-10	-15.307
Ca1	17170201	17170300	1.27479e-28	-45.7006		Ca5	33470051	33470250	4.74281e-06	31.9002		Ca1	27590601	27590700	2.53186e-05	-16.667
Ca1	17198651	17198750	1.85885e-32	-43.4714		Ca5	34576701	34576800	2.37151e-07	25.9754		Ca1	27791401	27791500	1.41948e-05	-15.1429
Ca1	17198851	17199000	8.67932e-44	-68.0898		Ca5	34595901	34596000	5.76623e-11	26.0541		Ca1	28317451	28317550	1.56422e-05	-18.8733
Ca1	17219851	17219950	6.72286e-17	-25.6757		Ca5	35345501	35345600	2.91973e-07	33.9183		Ca1	28329351	28329450	3.02088e-10	-16.1181
Ca1	17457951	17458100	3.05032e-70	-76.832		Ca5	36238301	36238400	1.77287e-07	25.3437		Ca1	28855201	28855350	1.10511e-05	-19.5636
Ca1	17481851	17481950	2.08774e-16	-36.6997		Ca5	37472251	37472350	1.25703e-09	32.1498		Ca1	29468151	29468300	6.4559e-06	-23.0687
Ca1	17483051	17483200	3.01292e-27	-44.584		Ca5	37472951	37473050	1.739e-08	27.7024		Ca1	30219201	30219300	1.12427e-07	-21.5951
Ca1	17485351	17485450	1.11152e-08	-32.4172		Ca5	37473901	37474050	1.32731e-10	30.3121		Ca1	30258951	30259050	2.7348e-05	-21.5656
Ca1	17493151	17493250	1.10793e-11	-28.6957		Ca5	37477751	37477900	5.32339e-08	28.4844		Ca1	30690151	30690250	1.73005e-05	-17.6109
Ca1	17629201	17629350	5.70272e-13	-32.8639		Ca5	37520601	37520700	1.57542e-09	28.76		Ca1	30842301	30842450	1.28943e-05	-18.9533
Ca1	17668301	17668450	2.06926e-11	-38.6123		Ca5	37520901	37521000	3.20507e-20	44.6809		Ca1	31473101	31473200	1.16582e-06	-16.4116
Ca1	17867151	17867250	1.11446e-11	-28.5373		Ca5	37535151	37535250	1.55368e-07	29.7559		Ca1	32239151	32239250	1.1404e-05	-21.9254
Ca1	18064901	18065000	7.61314e-14	-27.3214		Ca5	37575201	37575350	2.52449e-09	27.4581		Ca1	32575901	32576000	2.55021e-05	-15.3315
Ca1	18099751	18099900	9.89025e-10	-29.9914		Ca5	37578951	37579100	5.53425e-20	32.9399		Ca1	32699651	32699800	4.92881e-20	-31.3306
Ca1	18114151	18114250	2.33451e-08	-34		Ca5	37820801	37820950	3.35521e-10	30.2922		Ca1	32949401	32949500	2.63518e-05	-16.6636
Ca1	18698501	18698650	9.06611e-35	-38.0214		Ca5	37820951	37821050	4.37491e-05	25.3708		Ca1	33222001	33222100	2.68871e-05	-21.977
Ca1	18698751	18698850	3.95919e-28	-35.3903		Ca5	37821901	37822000	8.2597e-19	56.6312		Ca1	33596851	33596950	2.00572e-05	-17.0805
Ca1	18705051	18705150	2.47422e-13	-25.1307		Ca5	38239701	38239850	2.99357e-14	45.1618		Ca1	34668151	34668250	1.63364e-05	-16.0184
Ca1	18705951	18706100	3.65083e-16	-26.858		Ca5	38239901	38240000	8.13301e-08	25.5943		Ca1	35743601	35743700	1.15996e-05	-15.678
Ca1	18797601	18797700	9.10728e-15	-25.6366		Ca5	38263301	38263450	7.009e-23	32.8383		Ca1	35767251	35767400	2.57108e-09	-25.6439
Ca1	18870601	18870750	8.5779e-15	-40.75		Ca5	38263551	38263650	1.09931e-08	26.9414		Ca1	36242101	36242200	1.68125e-09	-22.9461
Ca1	19401651	19401750	4.82284e-09	-26.065		Ca5	38432101	38432250	1.20728e-16	37.4127		Ca1	36318901	36319000	1.25046e-12	-16.1553
Ca1	19402651	19402750	1.66795e-09	-30.3466		Ca5	38432501	38432650	1.43114e-15	31.1882		Ca1	36424551	36424650	4.2322e-06	-21.0379
Ca1	19455451	19455650	3.41369e-20	-31.7316		Ca5	38932451	38932600	2.49536e-06	28.2111		Ca1	37270751	37270900	1.16389e-05	-22.3183
Ca1	19592351	19592450	1.28513e-17	-30.3754		Ca5	38932551	38932700	3.44781e-09	36.3245		Ca1	37354051	37354150	1.69619e-06	-23.2548
Ca1	19632651	19632750	5.31466e-10	-32.2695		Ca5	38933701	38933800	1.19888e-09	29.1234		Ca1	37427051	37427150	1.20927e-07	-32.4258
Ca1	19929451	19929550	1.26339e-18	-43.2018		Ca5	39023451	39023550	2.49417e-08	25.259		Ca1	37542801	37542900	1.76313e-05	-17.8381
Ca1	20017501	20017650	7.53747e-13	-48.8649		Ca5	39037501	39037600	2.06186e-11	30.4815		Ca1	38090501	38090600	3.3092e-06	-16.1396
Ca1	20035701	20035800	9.48507e-22	-32.6568		Ca5	39515401	39515550	1.12824e-08	34.8059		Ca1	38503851	38503950	2.46782e-08	-16.4164
Ca1	20182051	20182200	4.92315e-22	-57.1655		Ca5	39592801	39592950	3.64971e-12	29.3681		Ca1	38913751	38913850	2.36062e-05	-21.4804
Ca1	20576501	20576650	1.75952e-11	-34.6053		Ca5	39601651	39601800	1.49328e-12	42.1524		Ca1	38917201	38917400	5.55095e-13	-24.1131
Ca1	20779451	20779550	4.03609e-20	-28.4699		Ca5	39601751	39601950	6.09645e-43	44.1965		Ca1	38917401	38917550	4.9642e-28	-37.3461
Ca1	20779601	20779700	1.35886e-12	-26.6117		Ca5	39617101	39617250	2.28372e-20	37.7702		Ca1	38917501	38917650	4.5871e-13	-23.7913
Ca1	20871351	20871450	3.39709e-07	-25.9334		Ca5	40290651	40290800	6.37712e-08	39.1702		Ca1	39464201	39464400	9.65705e-08	-20.6678
Ca1	21010001	21010100	3.1262e-12	-35.4003		Ca5	40308851	40308950	9.5371e-13	28.6137		Ca1	40299251	40299350	1.22688e-05	-17.5141
Ca1	21029851	21030000	2.06026e-28	-44.5457		Ca5	40309001	40309100	4.74806e-22	35.6683		Ca1	40527051	40527150	8.96484e-11	-17.8134
Ca1	21056401	21056500	5.84309e-30	-43.6477		Ca5	40309251	40309400	1.14892e-13	28.8488		Ca1	40895051	40895200	1.8205e-06	-17.3873
Ca1	21334901	21335000	1.37327e-10	-28.726		Ca5	40309351	40309500	1.15113e-13	35.0655		Ca1	40950651	40950750	1.79728e-07	-16.2645
Ca1	21474801	21474950	5.22795e-09	-33.5275		Ca5	40309501	40309650	1.53515e-14	36.0811		Ca1	41829851	41829950	3.71644e-06	-16.822
Ca1	21934751	21934850	1.91168e-14	-38.3401		Ca5	40309651	40309750	8.29295e-19	41.775		Ca1	42180251	42180350	2.49458e-06	-16.2307
Ca1	21960101	21960250	5.87712e-29	-32.0028		Ca5	40310101	40310200	4.75943e-16	25.1804		Ca1	42944601	42944700	3.04979e-05	-17.4612
Ca1	22085251	22085350	1.97962e-13	-40.3985		Ca5	40310201	40310350	6.88141e-27	29.1451		Ca1	42966801	42966900	2.10964e-05	-16.5564
Ca1	22130101	22130200	6.16643e-15	-26.7825		Ca5	41195651	41195750	1.09849e-06	30.0118		Ca1	42999351	42999500	8.02996e-09	-18.5968
Ca1	22181951	22182100	3.99751e-23	-33.049		Ca5	41488551	41488650	5.14114e-06	26.4922		Ca1	43087651	43087750	1.49154e-07	-20.1952
Ca1	22279401	22279500	4.68748e-11	-37.6793		Ca5	42800901	42801050	3.08021e-22	49.5496		Ca1	43366701	43366800	4.69421e-06	-20.813
Ca1	22283851	22283950	1.06366e-31	-54.9753		Ca5	42801001	42801150	1.14131e-45	37.1909		Ca1	43454351	43454450	1.21217e-05	-15.7859
Ca1	22454601	22454700	5.92462e-12	-28.9404		Ca5	44699801	44699950	5.09863e-07	27.1336		Ca1	43657601	43657700	1.27725e-08	-21.5491
Ca1	22645501	22645600	1.16146e-13	-26.2347		Ca5	45163201	45163400	2.6823e-17	31.8318		Ca1	43723751	43723850	6.5563e-07	-15.2225
Ca1	23122851	23122950	1.06388e-07	-30.2073		Ca5	45990251	45990400	8.44357e-10	28.9846		Ca1	45127301	45127400	2.23209e-09	-17.2712
Ca1	23174351	23174500	2.74726e-14	-33.2526		Ca5	46165301	46165400	1.59643e-08	37.7717		Ca1	45518701	45518800	2.63685e-06	-15.5126
Ca1	23174651	23174800	2.62788e-13	-26.1721		Ca5	46165601	46165750	1.04772e-08	27.3596		Ca1	45685401	45685500	8.1294e-06	-33.1311
Ca1	23174751	23174900	7.88381e-22	-31.492		Ca5	46170201	46170300	7.91947e-08	28.2032		Ca1	46111601	46111750	4.22594e-11	-22.3366
Ca1	23796701	23796850	2.02269e-29	-55.9664		Ca5	46344801	46344900	5.40547e-33	36.6909		Ca1	46418851	46418950	2.77563e-05	-27.1739
Ca1	23917201	23917300	8.7587e-27	-25.5967		Ca5	46760551	46760700	4.20112e-19	29.0229		Ca1	46775301	46775400	2.55587e-08	-20.5563
Ca1	24494651	24494800	2.76807e-16	-33.8281		Ca5	47237351	47237450	9.61647e-09	29.8693		Ca1	47080801	47080900	8.53781e-06	-26.3899
Ca1	24658451	24658600	1.04636e-51	-55.9092		Ca5	47619401	47619500	5.25907e-06	29.4797		Ca1	47185601	47185700	2.9594e-05	-16.6314
Ca1	24697801	24697950	5.31638e-72	-50.2961		Ca5	47752801	47752900	2.24416e-10	34.2705		Ca1	47426751	47426850	6.54185e-21	-43.5675
Ca1	24697901	24698050	2.45604e-57	-47.136		Ca5	47882701	47882800	1.41779e-07	29.8563		Ca1	47653201	47653350	7.30047e-06	-18.8763
Ca1	25985201	25985350	6.19977e-14	-44.0961		Ca6	1255351	1255450	8.69962e-16	49.0057		Ca1	47664101	47664200	1.15507e-05	-22.541
Ca1	26586201	26586300	3.83042e-09	-36.588		Ca6	1979701	1979800	5.06701e-10	27.9043		Ca1	47673451	47673550	3.19508e-06	-19.6818
Ca1	26777301	26777400	7.93303e-20	-34.9459		Ca6	2711351	2711500	4.56731e-73	84.0741		Ca1	47674951	47675100	9.03845e-06	-16.2101
Ca1	26883301	26883400	4.81075e-09	-40.4747		Ca6	3297001	3297150	7.69497e-12	32.184		Ca1	47852001	47852100	1.44802e-08	-17.4456
Ca1	27884601	27884700	2.05035e-14	-25.6101		Ca6	3297101	3297300	4.40241e-13	35.8701		Ca1	47913951	47914050	1.76487e-07	-22.2222
Ca1	28042501	28042650	4.31226e-19	-49.0241		Ca6	3588101	3588200	2.41913e-09	26.6511		Ca1	48094351	48094450	5.26536e-06	-18.4327
Ca1	28326601	28326700	1.05186e-11	-31.6654		Ca6	3588401	3588500	1.78444e-09	26.3285		Ca1	48207701	48207800	9.75529e-06	-17.5128
Ca1	28659201	28659300	1.12472e-11	-42.9341		Ca6	3598651	3598750	1.20174e-05	26.9834		Ca1	48262351	48262450	9.53885e-07	-20.7244
Ca1	28801551	28801650	3.67739e-13	-26.2636		Ca6	3598801	3598900	3.51682e-06	25.2033		Ca2	14201	14300	4.39501e-06	20.1322
Ca1	29088101	29088200	3.29546e-08	-26.1293		Ca6	3599101	3599250	1.11562e-07	33.9372		Ca2	320501	320600	5.82277e-06	15.6996
Ca1	29137801	29137950	8.72176e-18	-30.1225		Ca6	4236751	4236850	3.73416e-07	29.9073		Ca2	336151	336250	1.63461e-06	31.0751
Ca1	29138551	29138650	2.36441e-32	-41.5764		Ca6	4257101	4257200	2.32494e-26	61.3445		Ca2	650801	650900	1.82966e-06	19.8593
Ca1	29138651	29138750	3.14633e-31	-28.0384		Ca6	7915801	7915900	1.49847e-07	28.9212		Ca2	699801	699900	1.11198e-08	27.3393
Ca1	29179501	29179650	1.77493e-08	-26.411		Ca6	10042501	10042600	6.98445e-16	32.5376		Ca2	759201	759350	8.40201e-07	15.4258
Ca1	29213401	29213500	9.21744e-13	-39.0741		Ca6	10232101	10232250	1.27738e-14	27.0289		Ca2	1015251	1015350	5.02083e-06	20.2543
Ca1	29213501	29213600	9.77096e-14	-29.7915		Ca6	10232201	10232350	1.61797e-23	33.0432		Ca2	1131301	1131400	2.37451e-05	16.9504
Ca1	29215151	29215250	3.08963e-11	-26.9236		Ca6	10232401	10232500	2.03554e-19	26.8673		Ca2	1557251	1557350	1.74523e-08	17.8146
Ca1	29525301	29525400	0.000124131	-25.2248		Ca6	10675951	10676100	9.45511e-11	37.9492		Ca2	1580501	1580600	2.58746e-05	21.6524
Ca1	30003101	30003200	6.13304e-13	-33.0855		Ca6	10676101	10676300	2.41041e-07	28.1137		Ca2	1690451	1690600	6.96802e-06	18.2367
Ca1	30917051	30917150	2.78137e-22	-47.9932		Ca6	13028801	13028950	1.28896e-08	38.5314		Ca2	1760501	1760600	1.64724e-05	21.5305
Ca1	31166701	31166800	2.86146e-33	-66.9321		Ca6	13539401	13539500	1.22973e-08	35.8095		Ca2	1955101	1955200	4.23557e-08	25.0768
Ca1	31323401	31323500	1.54911e-18	-54.7414		Ca6	14778651	14778750	3.91639e-07	25.3759		Ca2	2096901	2097000	2.23353e-06	18.0257
Ca1	31485001	31485100	6.3543e-11	-27.8895		Ca6	15124251	15124350	1.04447e-06	27.2592		Ca2	2137901	2138000	2.58955e-07	22.3886
Ca1	31537901	31538000	9.46664e-16	-33.97		Ca6	15479051	15479150	9.23853e-13	29.4748		Ca2	2432251	2432350	2.62633e-07	20.53
Ca1	31976451	31976650	5.47698e-25	-33.088		Ca6	15480001	15480150	3.41136e-22	51.1725		Ca2	2664701	2664800	2.1047e-07	21.1063
Ca1	32240701	32240850	1.26647e-18	-37.2048		Ca6	15480101	15480250	9.70938e-70	64.969		Ca2	2678251	2678350	2.91046e-05	19.6863
Ca1	32723501	32723600	7.29403e-23	-56.5148		Ca6	17915201	17915300	4.57163e-13	28.0953		Ca2	2717601	2717700	1.31759e-05	15.6211
Ca1	33058351	33058450	4.37297e-06	-27.0912		Ca6	18390351	18390450	4.40028e-07	26.6807		Ca2	2732151	2732250	2.33901e-07	25.3512
Ca1	33114451	33114600	1.69036e-15	-25.1969		Ca6	19307251	19307400	7.62983e-13	30.4078		Ca2	2835201	2835300	1.34296e-05	20.2755
Ca1	33168501	33168650	1.30721e-29	-46.4013		Ca6	19307351	19307500	1.98516e-12	27.9331		Ca2	2937101	2937200	4.90882e-06	17.2065
Ca1	33823951	33824050	3.07178e-14	-46.5055		Ca6	19308051	19308150	7.0957e-08	29.2169		Ca2	3117701	3117800	3.14195e-07	27.3123
Ca1	33849601	33849700	2.15586e-54	-26.064		Ca6	19551501	19551600	5.88722e-18	46.5993		Ca2	3226901	3227050	7.71975e-06	22.2498
Ca1	34307351	34307450	1.27644e-15	-25.9443		Ca6	19554901	19555000	7.35143e-11	28.6787		Ca2	3339151	3339250	1.79495e-06	17.3638
Ca1	34380851	34381000	2.4417e-08	-28.2984		Ca6	21024101	21024250	1.11103e-08	27.1305		Ca2	3360451	3360600	1.90749e-05	17.239
Ca1	34598451	34598550	1.43886e-16	-26.977		Ca6	21088251	21088350	8.42464e-09	28.7034		Ca2	3453501	3453600	2.09531e-05	15.7228
Ca1	34686001	34686100	5.98969e-19	-60.7059		Ca6	21167951	21168050	1.1334e-17	31.1174		Ca2	3744301	3744450	5.70637e-08	18.9531
Ca1	34704551	34704700	2.41532e-11	-26.7528		Ca6	22876001	22876100	4.00773e-07	25.817		Ca2	4119701	4119800	1.55934e-07	20.6721
Ca1	34755301	34755400	1.60812e-37	-25.5829		Ca6	22893601	22893700	6.59877e-13	42.1708		Ca2	4171701	4171800	3.36821e-06	17.8285
Ca1	34908951	34909050	2.45742e-05	-27.2129		Ca6	23023301	23023400	1.4206e-07	28.0258		Ca2	4264751	4264850	2.84708e-05	16.4909
Ca1	35159901	35160000	7.44135e-10	-29.9738		Ca6	27026101	27026200	1.43133e-06	25.5013		Ca2	4536801	4536900	4.34771e-06	20.2
Ca1	36400151	36400250	4.43424e-29	-33.4707		Ca6	27081051	27081150	3.43426e-11	33.4066		Ca2	4639501	4639650	1.42439e-06	21.9697
Ca1	36485151	36485350	2.52968e-17	-28.9595		Ca6	28168901	28169100	1.47415e-06	38.1211		Ca2	5134401	5134500	1.66801e-05	18.0673
Ca1	37240051	37240200	2.78679e-37	-47.0594		Ca6	28175901	28176000	6.22804e-13	47.4524		Ca2	5659901	5660000	7.589e-06	24.3705
Ca1	37743551	37743650	1.22452e-13	-26.4975		Ca6	28176451	28176550	9.30202e-15	29.7584		Ca2	6157901	6158000	1.31733e-05	15.6397
Ca1	37905101	37905250	3.97234e-24	-28.9788		Ca6	29850601	29850750	2.68565e-16	32.2693		Ca2	6435201	6435300	3.79464e-06	19.0386
Ca1	37905201	37905350	1.11446e-16	-29.0882		Ca6	30764551	30764650	1.51393e-21	28.5358		Ca2	6677101	6677200	1.91977e-05	15.9611
Ca1	37905401	37905500	2.91716e-17	-25.7359		Ca6	32539501	32539600	5.84951e-13	26.7349		Ca2	6761151	6761250	8.73857e-07	15.9235
Ca1	38203401	38203550	9.85695e-47	-48.0931		Ca6	33598801	33598900	1.3415e-15	26.8954		Ca2	6791651	6791750	1.48703e-05	16.8108
Ca1	38214651	38214750	5.85428e-25	-48.8917		Ca6	34400401	34400550	1.46565e-14	30.1249		Ca2	6791801	6791900	1.24361e-05	18.7123
Ca1	38224501	38224650	1.00751e-05	-43.8287		Ca6	34405101	34405200	4.45692e-16	30.5606		Ca2	6996451	6996550	1.53341e-07	20.114
Ca1	38266151	38266250	1.63431e-15	-28.6822		Ca6	34480951	34481050	2.55843e-10	25.6546		Ca2	7034701	7034800	1.44685e-05	15.8869
Ca1	38278701	38278800	6.33227e-19	-51.8823		Ca6	34495001	34495100	2.36777e-16	49.6656		Ca2	7575751	7575850	1.5765e-07	16.2709
Ca1	38509251	38509400	1.61378e-27	-47.6617		Ca6	34836751	34836900	1.1089e-45	56.0502		Ca2	7585451	7585600	4.06967e-25	44.1917
Ca1	38546301	38546450	1.45965e-48	-84.9465		Ca6	34836851	34837000	5.25823e-18	45.2982		Ca2	7585551	7585700	1.27196e-49	38.5621
Ca1	38672551	38672750	4.98808e-17	-34.0356		Ca6	34837251	34837350	4.4334e-09	37.1032		Ca2	7731701	7731800	4.09237e-06	15.6123
Ca1	38739301	38739450	6.99951e-38	-40.1618		Ca6	35018201	35018300	6.6069e-09	26.5959		Ca2	7908251	7908400	1.22937e-05	20.075
Ca1	38882051	38882150	8.95215e-14	-31.4761		Ca6	35855001	35855100	2.47604e-06	25.9459		Ca2	8257001	8257150	8.59981e-06	15.8133
Ca1	38883701	38883800	1.70611e-10	-27.6702		Ca6	36369501	36369600	4.75432e-15	25.719		Ca2	8550451	8550550	7.12238e-07	15.9917
Ca1	39828301	39828450	7.66635e-24	-27.3475		Ca6	36690201	36690300	1.8424e-09	25.9477		Ca2	8698951	8699100	6.10578e-09	16.7708
Ca1	39828401	39828550	1.91098e-23	-29.2524		Ca6	36696601	36696700	1.61638e-31	67.7917		Ca2	8922001	8922100	2.8046e-08	19.4291
Ca1	39828801	39828950	6.86186e-44	-26.6893		Ca6	37228301	37228400	7.29515e-09	26.6178		Ca2	9063351	9063450	5.69196e-08	15.6597
Ca1	39829001	39829100	1.23409e-21	-31.3417		Ca6	38147351	38147450	4.58771e-07	25.2203		Ca2	9215051	9215150	1.52262e-05	15.8496
Ca1	40420551	40420750	1.50621e-28	-43.1878		Ca6	38338401	38338500	5.60135e-13	42.0284		Ca2	9285401	9285550	5.49076e-06	16.0092
Ca1	40420851	40421000	1.8269e-31	-40.4553		Ca6	38361801	38361950	9.39819e-13	35.2461		Ca2	9337151	9337250	2.10695e-06	18.6988
Ca1	40420951	40421100	3.89852e-26	-48.8808		Ca6	39950701	39950800	6.25451e-08	27.6969		Ca2	10278751	10278850	9.84036e-09	16.5572
Ca1	40421051	40421200	3.84012e-73	-65.8975		Ca6	39952851	39952950	8.10261e-14	36.2155		Ca2	10397301	10397400	3.22542e-05	21.9595
Ca1	40421151	40421300	1.19673e-92	-70.3132		Ca6	40124701	40124800	7.02699e-65	88.1402		Ca2	10465551	10465650	2.54244e-06	15.3162
Ca1	40630851	40631000	9.79542e-14	-27.1733		Ca6	40124801	40124950	1.97224e-47	71.1185		Ca2	10594601	10594700	9.26321e-10	28.8421
Ca1	40635351	40635450	7.36511e-19	-41.8348		Ca6	40125201	40125350	5.2773e-47	57.2871		Ca2	10764251	10764350	2.82706e-05	16.9298
Ca1	40745851	40745950	2.3035e-19	-25.3836		Ca6	40125301	40125450	6.70494e-35	39.3886		Ca2	11264901	11265000	5.84066e-07	19.9726
Ca1	40819801	40819900	4.60535e-07	-31.1111		Ca6	40125401	40125550	3.25388e-18	33.5293		Ca2	11626251	11626350	2.33181e-07	21.0276
Ca1	41466401	41466600	5.13961e-13	-38.1587		Ca6	40239101	40239200	4.47774e-07	27.8952		Ca2	11939151	11939350	4.65029e-12	23.2797
Ca1	41713051	41713200	1.21979e-11	-27.9304		Ca6	40240401	40240550	1.68104e-08	28.9739		Ca2	12227551	12227650	3.24138e-05	19.1401
Ca1	41800101	41800250	2.61079e-15	-45.0574		Ca6	40276801	40276950	6.76706e-11	30.7521		Ca2	12362901	12363000	1.8344e-06	16.0808
Ca1	42386301	42386400	6.86718e-11	-25.3394		Ca6	40288251	40288350	3.20565e-06	28.673		Ca2	12498001	12498100	3.88885e-06	17.4722
Ca1	42492151	42492300	3.92975e-10	-27.1382		Ca6	40460951	40461050	8.41279e-11	29.1291		Ca2	12536001	12536100	3.19878e-05	18.2419
Ca1	42896051	42896150	7.29451e-13	-26.7001		Ca6	40941401	40941550	2.92734e-31	36.1988		Ca2	13074151	13074250	2.87597e-08	15.1845
Ca1	43842051	43842150	6.57366e-07	-29.6396		Ca6	40941751	40941850	8.18869e-11	41.1266		Ca2	13160201	13160300	9.93514e-06	16.4698
Ca1	43934051	43934150	1.41647e-25	-48.5437		Ca6	41741901	41742050	1.14699e-10	30.4534		Ca2	13611851	13611950	2.67256e-09	19.2233
Ca1	44016651	44016750	1.76384e-08	-25.8888		Ca6	42006501	42006600	1.07666e-11	41.2632		Ca2	13697501	13697600	1.88011e-07	17.6039
Ca1	44039901	44040050	4.22014e-12	-36.9542		Ca6	42117551	42117650	1.73249e-05	26.2745		Ca2	14022501	14022600	2.82954e-09	26.2202
Ca1	44040851	44041000	1.06758e-12	-40.5372		Ca6	42156551	42156700	2.75246e-05	26.5512		Ca2	14233701	14233800	1.38183e-07	20.6622
Ca1	44525551	44525750	2.7838e-12	-27.8357		Ca6	42156701	42156800	7.90332e-15	45.0224		Ca2	14272401	14272500	2.56787e-08	17.6101
Ca1	45085051	45085150	5.57647e-05	-25.61		Ca6	42317451	42317550	3.2956e-06	25.3665		Ca2	14275751	14275850	3.91369e-06	18.2435
Ca1	45642001	45642150	6.75132e-31	-41.1752		Ca6	42810351	42810500	3.96402e-11	33.4428		Ca2	14280751	14280850	1.93464e-06	18.8553
Ca1	45642101	45642300	1.02418e-16	-30.9086		Ca6	43145151	43145300	7.80689e-17	48.684		Ca2	14410751	14410900	1.89126e-07	18.4926
Ca1	45643901	45644000	2.15146e-11	-34.9947		Ca6	44385551	44385650	1.11314e-07	25.7517		Ca2	14596201	14596300	1.52113e-08	16.6802
Ca1	45644051	45644150	5.26168e-10	-28.9781		Ca6	44386201	44386350	5.51976e-39	51.8186		Ca2	14830751	14830850	6.2062e-07	17.3301
Ca1	45871451	45871550	1.43854e-10	-25.4128		Ca6	44386601	44386750	2.33932e-29	46.4337		Ca2	15173251	15173400	7.17419e-09	17.4801
Ca1	46242201	46242300	1.26458e-14	-28.6497		Ca6	44386701	44386850	4.18899e-23	33.0502		Ca2	15502001	15502150	3.98544e-06	15.7784
Ca1	46429351	46429450	1.36648e-15	-39.8392		Ca6	44386801	44387000	8.26054e-27	32.2027		Ca2	15631401	15631500	1.51182e-07	19.5482
Ca1	46836501	46836600	6.5032e-11	-29.5785		Ca6	44387351	44387500	3.95334e-32	30.8048		Ca2	15717051	15717150	6.46961e-08	18.8617
Ca1	46899851	46899950	3.24412e-11	-27.856		Ca6	44387651	44387800	6.83364e-15	30.5029		Ca2	16399201	16399300	2.68286e-05	15.4233
Ca1	47004551	47004750	1.62993e-36	-81.2081		Ca6	44395351	44395500	5.64474e-08	26.3559		Ca2	16550101	16550200	4.61057e-06	18.562
Ca1	47095451	47095550	5.98489e-18	-50.0806		Ca6	44430951	44431050	1.14962e-08	30.2807		Ca2	16621401	16621500	3.93267e-06	18.4044
Ca1	47110751	47110850	1.56908e-16	-44.8634		Ca6	44527751	44527850	3.73809e-12	33.6607		Ca2	16685951	16686050	1.63654e-05	20.5416
Ca1	47417401	47417600	1.80748e-16	-56.8212		Ca6	45306201	45306300	4.4929e-25	69.3353		Ca2	16815201	16815300	2.06725e-07	15.105
Ca1	47720401	47720600	4.40745e-25	-28.5298		Ca6	45382101	45382200	1.90102e-05	29.8851		Ca2	16847451	16847550	8.7387e-06	17.9975
Ca1	47912501	47912600	1.84586e-07	-28.4446		Ca6	46302501	46302600	1.0754e-05	27.3465		Ca2	16880001	16880100	1.10867e-05	15.8663
Ca1	48178101	48178200	5.49179e-15	-26.2478		Ca6	46693401	46693500	8.00317e-08	25.2		Ca2	17869201	17869300	1.64687e-08	16.5898
Ca2	256901	257050	1.43601e-08	31.6181		Ca6	47230651	47230800	1.70423e-09	31.5524		Ca2	18928851	18929050	5.79044e-13	33.0893
Ca2	1611001	1611100	1.52344e-10	29.242		Ca6	47927951	47928100	1.22573e-10	29.0664		Ca2	18929051	18929250	5.27857e-09	28.9013
Ca2	1803801	1803900	2.44238e-08	25.3171		Ca6	48352851	48353000	8.69213e-21	44.8383		Ca2	19383251	19383350	1.9551e-06	30.177
Ca2	1995501	1995700	4.45572e-33	51.087		Ca6	50605751	50605850	2.00695e-10	28.3784		Ca2	19455851	19456000	8.96742e-06	17.9038
Ca2	2226501	2226600	1.32774e-20	55.8652		Ca6	50792851	50792950	1.34732e-16	57.5337		Ca2	20319001	20319100	9.82252e-06	15.7574
Ca2	2609351	2609450	6.60779e-08	26.3415		Ca6	50792951	50793100	7.57807e-14	38.6622		Ca2	20787051	20787150	1.83989e-05	15.8056
Ca2	3142601	3142750	2.56976e-17	31.1281		Ca6	51979051	51979200	1.63214e-13	41.8877		Ca2	20822651	20822750	1.24449e-05	18.8285
Ca2	3182951	3183050	1.94164e-05	25.1718		Ca6	53682301	53682400	8.2898e-07	33.1434		Ca2	21847201	21847350	1.42267e-09	15.5347
Ca2	3789301	3789400	2.19502e-14	43.9877		Ca6	53682551	53682700	2.07977e-11	36.3027		Ca2	22334801	22334900	1.27263e-06	17.7412
Ca2	4364101	4364250	1.09399e-22	45.3904		Ca6	53857501	53857600	3.28199e-15	27.753		Ca2	22619951	22620050	2.90907e-05	15.0248
Ca2	4786801	4786900	1.99309e-07	32.2548		Ca6	54965701	54965800	6.41226e-05	25.5231		Ca2	23120051	23120200	3.64077e-09	26.0279
Ca2	4972951	4973050	6.31334e-10	36.4528		Ca6	55079501	55079600	1.29381e-10	37.5112		Ca2	23241751	23241900	9.00195e-07	28.4475
Ca2	5119301	5119400	8.5589e-09	25.104		Ca6	56216601	56216700	7.38069e-06	25.5138		Ca2	23549701	23549800	2.35403e-05	19.3768
Ca2	8358601	8358700	1.92219e-39	69.3277		Ca6	56358251	56358400	1.74689e-06	28.0705		Ca2	23696751	23696850	2.10513e-05	17.7247
Ca2	8363951	8364050	4.14689e-11	27.5781		Ca6	56360901	56361000	1.53722e-05	25.0159		Ca2	24029401	24029500	9.08182e-06	26.7421
Ca2	8366601	8366750	2.34904e-52	33.8828		Ca6	56361001	56361100	3.0489e-09	31.4782		Ca2	24963451	24963550	3.38231e-07	20.9221
Ca2	8521051	8521150	2.72851e-20	28.358		Ca6	56646401	56646500	1.70001e-29	72.5806		Ca2	25114751	25114900	2.76419e-06	27.9109
Ca2	8536851	8536950	3.52917e-12	34.211		Ca6	57181251	57181400	3.28209e-14	28.812		Ca2	25127801	25127950	2.889e-08	20.0555
Ca2	9718201	9718300	6.31887e-05	27.4194		Ca6	57181351	57181550	1.086e-23	38.905		Ca2	25643801	25643900	2.70784e-08	31.0577
Ca2	9858951	9859050	1.07491e-06	33.7743		Ca7	801701	801800	1.00063e-05	29.1344		Ca2	25814451	25814550	2.22066e-07	20.6971
Ca2	9962551	9962650	2.92981e-15	27.8964		Ca7	802001	802150	3.21913e-17	35.0546		Ca2	25916451	25916550	7.74757e-07	17.4564
Ca2	9965551	9965650	1.03948e-22	44.5157		Ca7	1424501	1424600	4.43002e-09	27.7832		Ca2	25998401	25998550	2.71667e-12	15.7357
Ca2	9988751	9988850	3.86106e-10	31.8809		Ca7	3380751	3380850	5.45099e-07	28.9231		Ca2	26005201	26005350	1.30296e-08	19.7747
Ca2	10379051	10379150	5.23361e-08	29.3841		Ca7	5662051	5662200	5.32332e-13	31.2471		Ca2	26269651	26269800	1.86149e-07	20.4843
Ca2	10537601	10537750	1.51799e-10	36.286		Ca7	5662351	5662500	5.31489e-17	36.525		Ca2	26421951	26422050	2.98319e-07	19.5077
Ca2	11459501	11459600	8.03671e-10	27.5276		Ca7	5662851	5663050	1.50074e-14	29.7037		Ca2	26469201	26469300	2.41157e-07	27.0563
Ca2	11691251	11691350	1.2867e-05	25.8299		Ca7	5885101	5885250	3.68918e-14	48.1317		Ca2	26569751	26569850	9.79919e-09	19.3314
Ca2	12062401	12062550	3.06074e-54	82.2967		Ca7	6071051	6071200	3.2522e-12	34.55		Ca2	26884651	26884750	1.07086e-06	15.6349
Ca2	12865101	12865200	2.56567e-11	33.4611		Ca7	6898801	6898900	4.95729e-11	27.8219		Ca2	26907451	26907550	1.36119e-05	18.043
Ca2	13596651	13596850	2.30335e-08	34.6783		Ca7	8139651	8139800	7.86481e-43	51.916		Ca2	27121301	27121500	6.01138e-06	19.9171
Ca2	13994751	13994850	4.03615e-15	25.3731		Ca7	8139751	8139950	8.70202e-13	37.6753		Ca2	27191551	27191700	7.75384e-09	19.8788
Ca2	14140401	14140550	1.34417e-16	35.6107		Ca7	8140301	8140400	1.46872e-41	65.3642		Ca2	27209701	27209850	3.54938e-06	19.5113
Ca2	14778701	14778800	8.84331e-06	26.763		Ca7	8140701	8140850	1.20844e-73	66.969		Ca2	27612251	27612350	9.94417e-07	19.4707
Ca2	14803501	14803600	5.45721e-06	26.8592		Ca7	8140901	8141000	3.35544e-12	39.3893		Ca2	28104901	28105000	4.3327e-13	18.0461
Ca2	14803601	14803700	9.41459e-09	34.3816		Ca7	8141001	8141100	1.19281e-17	35.1854		Ca2	28163851	28163950	6.66748e-06	17.1599
Ca2	15224451	15224550	1.06472e-13	25.5357		Ca7	8471901	8472000	7.06177e-05	25.6433		Ca2	28354201	28354300	1.45923e-05	18.1599
Ca2	15955001	15955150	1.71845e-36	74.742		Ca7	8686601	8686700	1.71394e-07	27.08		Ca2	28595201	28595300	1.49516e-09	16.8307
Ca2	16266301	16266400	4.75987e-09	26.1436		Ca7	9265001	9265100	1.94364e-11	38.0081		Ca2	28642451	28642550	4.59724e-09	16.8605
Ca2	17204251	17204400	1.00912e-32	55.615		Ca7	10608251	10608450	2.34251e-08	37.7056		Ca2	29462351	29462500	2.38113e-06	18.3849
Ca2	17449551	17449650	1.54491e-14	36.7485		Ca7	13922101	13922250	1.69043e-18	38.5631		Ca2	29559251	29559400	5.81378e-06	23.9403
Ca2	19303951	19304050	1.11845e-14	28.6723		Ca7	14129001	14129200	6.69044e-21	32.405		Ca2	29858001	29858150	4.86444e-08	22.7598
Ca2	19689451	19689600	2.96073e-27	49.2052		Ca7	14129251	14129400	9.18704e-09	29.7165		Ca2	30180201	30180300	8.71096e-10	30.5178
Ca2	19689801	19689900	7.66266e-24	65.832		Ca7	16459051	16459150	5.09612e-07	25.1775		Ca2	30384651	30384750	9.73467e-06	17.2623
Ca2	20393501	20393600	4.34173e-14	26.8477		Ca7	16965501	16965600	1.28104e-06	30.2408		Ca2	30437051	30437200	9.58039e-07	34.389
Ca2	20899601	20899700	6.75513e-05	26.0802		Ca7	17082351	17082500	5.31257e-10	33.0579		Ca2	30640601	30640700	3.57596e-06	15.2736
Ca2	23298851	23298950	3.42728e-25	72.0572		Ca7	17556351	17556450	5.76422e-25	61.3943		Ca2	30991101	30991200	8.10441e-12	39.2178
Ca2	24212201	24212350	5.02096e-10	25.3946		Ca7	17907101	17907250	8.79937e-07	28.4911		Ca2	31187251	31187350	6.62541e-06	21.0604
Ca2	24454451	24454600	6.41602e-25	25.904		Ca7	17907201	17907350	5.20148e-13	27.343		Ca2	31573601	31573700	1.67663e-05	15.4743
Ca2	24579501	24579600	1.00971e-10	28.5039		Ca7	17952751	17952900	5.42118e-37	50.949		Ca2	31639501	31639650	6.19105e-09	15.745
Ca2	25150101	25150200	4.52821e-08	27.482		Ca7	17956301	17956450	1.47609e-07	28.5945		Ca2	32030501	32030600	2.48602e-07	16.2539
Ca2	25168251	25168450	3.45677e-25	44.2775		Ca7	17999201	17999300	1.12349e-10	25.4997		Ca2	32603351	32603450	3.34156e-07	33.7774
Ca2	25937301	25937400	6.07807e-05	25.2396		Ca7	18627801	18627900	5.21375e-34	71.5904		Ca2	32717801	32717900	1.97325e-05	17.4287
Ca2	25983101	25983200	4.79967e-21	44.5653		Ca7	18964001	18964150	4.8691e-07	29.8562		Ca2	32717901	32718000	3.33115e-06	21.1692
Ca2	27072951	27073100	6.57224e-16	27.9662		Ca7	19299601	19299700	7.08294e-06	29.1199		Ca2	32872451	32872550	3.09632e-05	17.19
Ca2	27211751	27211850	5.89157e-45	83.4586		Ca7	20251201	20251300	1.14947e-10	28.9164		Ca2	33018701	33018800	8.92196e-08	24.4763
Ca2	27229051	27229150	6.61782e-09	33.7827		Ca7	22496601	22496750	4.73358e-11	30.0591		Ca2	33036951	33037050	4.80169e-06	15.5308
Ca2	27780501	27780650	9.42002e-13	36.6384		Ca7	22496701	22496900	6.05494e-08	28.186		Ca2	33169801	33169950	2.22099e-05	16.626
Ca2	28555251	28555400	4.41178e-11	30.9955		Ca7	22497001	22497150	2.65283e-09	36.531		Ca2	33170301	33170450	2.48131e-06	22.6155
Ca2	29075951	29076050	7.37138e-07	25.2985		Ca7	23957401	23957550	2.55034e-32	59.1115		Ca2	33209351	33209450	1.36208e-05	15.565
Ca2	29227301	29227450	2.55424e-32	58.652		Ca7	25033701	25033800	2.23433e-08	25.1554		Ca2	33331251	33331350	3.30514e-06	19.2385
Ca2	29333351	29333450	5.35684e-08	25.2986		Ca7	25568651	25568850	9.01263e-11	35.3742		Ca2	33403851	33403950	2.69054e-05	18.0517
Ca2	29490451	29490550	3.33669e-08	26.0674		Ca7	27057601	27057700	8.40122e-13	34.9034		Ca2	33457401	33457550	4.8902e-11	22.6748
Ca2	29544951	29545050	4.43572e-16	54.3468		Ca7	27781601	27781750	4.37158e-10	26.4057		Ca2	33498901	33499000	1.20901e-06	19.6964
Ca2	30005601	30005700	3.6602e-13	32.9007		Ca7	27832851	27832950	6.64944e-22	28.6181		Ca2	33624451	33624550	4.54727e-06	18.1376
Ca2	30036301	30036400	4.90481e-18	35.8568		Ca7	27885501	27885600	8.88067e-07	26.1319		Ca2	33911801	33911900	6.98377e-06	16.7729
Ca2	31052351	31052450	1.02482e-16	40		Ca7	28343451	28343550	2.46454e-08	31.0044		Ca2	33939951	33940050	1.41064e-06	17.2825
Ca2	31152101	31152200	1.0051e-31	58.0562		Ca7	28343551	28343700	4.24948e-20	33.2348		Ca2	34277251	34277350	3.21606e-06	16.1253
Ca2	31350801	31350950	1.50238e-15	33.5131		Ca7	28343751	28343900	3.91148e-19	25.4819		Ca2	34398251	34398400	3.24799e-07	16.3861
Ca2	31573951	31574100	1.65513e-15	29.4247		Ca7	28343951	28344050	1.80422e-14	32.2997		Ca2	35222801	35222900	1.38357e-05	17.1652
Ca2	31726001	31726100	7.21397e-17	25.9542		Ca7	30811951	30812050	4.06719e-06	27.7411		Ca2	35458851	35458950	1.6794e-06	20.27
Ca2	31870101	31870250	1.60456e-14	32.8552		Ca7	31386701	31386800	3.89372e-08	31.5587		Ca2	35742951	35743100	3.08472e-05	18.018
Ca2	31963001	31963100	2.02423e-24	34.4469		Ca7	33284451	33284600	2.34163e-07	29.933		Ca2	35761551	35761650	2.44646e-05	24.4826
Ca2	32273951	32274050	1.03986e-13	42.9874		Ca7	33284651	33284750	1.29133e-09	31.823		Ca2	36073251	36073350	6.06538e-06	15.912
Ca2	32410851	32410950	2.22329e-08	33.1242		Ca7	33584451	33584550	1.76192e-18	42.229		Ca2	36287801	36287900	2.00879e-05	23.7719
Ca2	32630801	32630950	2.06898e-20	37.8323		Ca7	33584601	33584700	1.832e-10	35.8889		Ca2	36570251	36570350	7.57419e-06	22.246
Ca2	32669451	32669550	4.75628e-17	26.9998		Ca7	35052201	35052300	3.14987e-08	27.5723		Ca2	37551	37700	7.71075e-09	-20.9697
Ca2	32794101	32794200	9.96676e-10	25.6699		Ca7	35053551	35053700	7.14066e-09	28.9921		Ca2	75001	75100	3.16174e-08	-19.0374
Ca2	32808451	32808550	3.3189e-06	25.4808		Ca7	35054651	35054800	1.5408e-24	35.8772		Ca2	158601	158700	4.74995e-07	-19.5071
Ca2	33041351	33041450	5.69345e-15	31.2671		Ca7	35054751	35054900	7.92766e-16	27.4368		Ca2	254251	254350	1.13882e-05	-15.6563
Ca2	33225301	33225450	1.46054e-09	27.0383		Ca7	35619401	35619600	6.76173e-16	27.9147		Ca2	264501	264600	6.18216e-06	-34.0871
Ca2	33399651	33399800	3.65104e-31	43.5961		Ca7	35664851	35664950	2.54593e-07	27.6524		Ca2	636201	636300	1.24867e-05	-17.9772
Ca2	33657951	33658050	2.74675e-24	28.6959		Ca7	37684701	37684800	4.3342e-17	27.3122		Ca2	978601	978700	8.26453e-11	-26.4395
Ca2	33806901	33807000	2.90373e-08	27.038		Ca7	37684851	37685000	1.1401e-18	28.3352		Ca2	1585401	1585500	2.12295e-05	-16.6308
Ca2	33927401	33927550	1.34215e-34	41.8609		Ca7	37685001	37685100	1.43917e-11	27.4833		Ca2	2404351	2404450	9.01078e-07	-15.0891
Ca2	33927551	33927700	7.64702e-25	34.7299		Ca7	37743301	37743450	5.90252e-08	33.9457		Ca2	2569101	2569200	2.17901e-10	-33.0791
Ca2	34292601	34292750	6.58801e-52	70.7796		Ca7	37922801	37922950	2.47231e-08	29.2727		Ca2	2809551	2809650	4.65451e-06	-17.0068
Ca2	34389251	34389350	1.27428e-43	25.8808		Ca7	38491451	38491550	1.4621e-09	32.0422		Ca2	2883651	2883750	1.04543e-06	-18.9285
Ca2	35148251	35148350	3.83974e-16	31.6286		Ca7	39348151	39348300	4.80052e-11	34.3073		Ca2	3357001	3357100	7.21342e-07	-16.464
Ca2	35479651	35479750	3.12304e-08	25.438		Ca7	39348501	39348650	2.3061e-14	33.9007		Ca2	3615901	3616000	2.05859e-05	-20.8846
Ca2	35607201	35607300	1.93098e-14	32.7255		Ca7	40045601	40045750	4.62411e-14	30.1657		Ca2	4704651	4704750	1.97608e-07	-15.374
Ca2	19201	19300	3.49713e-16	-36.243		Ca7	40181951	40182050	5.15876e-07	26.5813		Ca2	4811001	4811100	3.47487e-09	-15.8323
Ca2	49251	49350	2.06182e-22	-37.9088		Ca7	40323451	40323550	5.7342e-05	31.0823		Ca2	4812901	4813000	7.94741e-13	-15.0328
Ca2	49501	49600	6.84532e-19	-29.0308		Ca7	40366451	40366550	3.47628e-10	32.2761		Ca2	5122701	5122800	5.00954e-08	-28.1085
Ca2	401201	401350	5.40261e-19	-27.6028		Ca7	40367401	40367500	4.13798e-07	27.6458		Ca2	5947601	5947700	8.46706e-08	-21.5273
Ca2	536851	536950	4.37023e-29	-62.1243		Ca7	42616451	42616600	2.73981e-23	33.3513		Ca2	6530001	6530100	2.88079e-06	-18.6066
Ca2	758301	758400	1.56207e-11	-35.7236		Ca7	43008601	43008700	5.18305e-11	27.6828		Ca2	6786201	6786300	5.8001e-07	-17.0931
Ca2	846451	846550	6.01917e-15	-41.6216		Ca7	43581601	43581750	1.16452e-11	29.8252		Ca2	6806601	6806700	7.09479e-06	-15.1377
Ca2	879451	879550	5.14001e-20	-49.7975		Ca7	43582851	43582950	3.07012e-09	32.1011		Ca2	6814401	6814500	1.11277e-07	-17.2767
Ca2	982251	982350	1.0205e-11	-27.5252		Ca7	43607701	43607800	2.52404e-09	33.3806		Ca2	6851551	6851650	4.84787e-06	-24.3961
Ca2	1125301	1125450	3.04092e-07	-29.3617		Ca7	44489651	44489750	4.51953e-20	31.99		Ca2	7140901	7141000	9.15606e-07	-15.5848
Ca2	1790251	1790350	4.32808e-19	-34.0409		Ca7	44491651	44491750	1.56171e-11	46.5738		Ca2	7747401	7747500	2.48104e-07	-16.9991
Ca2	1989501	1989600	1.696e-15	-26.2626		Ca7	45325201	45325350	1.13705e-09	29.1896		Ca2	7919451	7919550	2.1177e-05	-17.807
Ca2	1994401	1994550	3.11704e-09	-25.6513		Ca7	46493551	46493650	9.55992e-17	32.4635		Ca2	8131351	8131450	1.26526e-05	-15.1818
Ca2	2043501	2043600	5.56733e-17	-38.5522		Ca7	46878401	46878500	3.84764e-10	30.7866		Ca2	8244201	8244300	1.86207e-07	-22.4712
Ca2	2069901	2070000	8.99862e-07	-25.2557		Ca7	47197051	47197150	3.27669e-05	25.5221		Ca2	8271151	8271250	3.9306e-07	-21.2585
Ca2	2070051	2070200	5.71067e-13	-26.759		Ca7	47596301	47596400	1.50758e-05	28.044		Ca2	8296651	8296750	4.14522e-07	-22.3477
Ca2	2227351	2227450	2.55783e-35	-46.0708		Ca7	47839551	47839650	3.6243e-07	26.3385		Ca2	8610101	8610200	1.30009e-07	-16.2537
Ca2	2625101	2625250	5.25173e-18	-35.3484		Ca7	48056001	48056150	6.58173e-11	33.5896		Ca2	8837801	8837900	5.29545e-07	-16.8857
Ca2	2625601	2625750	1.63865e-27	-40.6418		Ca8	1026051	1026150	3.58904e-05	25.5875		Ca2	8944451	8944550	3.13408e-05	-19.7855
Ca2	3163651	3163750	4.73647e-10	-28.784		Ca8	1206051	1206200	2.12135e-17	34.9138		Ca2	9353651	9353750	2.27997e-05	-15.6116
Ca2	3311601	3311700	4.25223e-14	-30.161		Ca8	2810651	2810750	1.85124e-08	25.6725		Ca2	9592501	9592600	3.41174e-06	-28.8433
Ca2	3485651	3485750	2.78345e-29	-46.7742		Ca8	2828051	2828200	1.05517e-08	35.2754		Ca2	9612001	9612100	4.93993e-07	-20.0893
Ca2	3663451	3663550	1.95248e-25	-66.5118		Ca8	3939851	3940000	9.18083e-10	25.2296		Ca2	9654351	9654450	2.27325e-05	-17.9242
Ca2	3708601	3708750	5.50436e-09	-29.739		Ca8	10409151	10409300	1.3832e-10	27.8016		Ca2	9714751	9714850	2.10531e-06	-20.4946
Ca2	3776201	3776300	0.000118616	-26.2141		Ca8	10409251	10409400	7.98053e-15	27.8873		Ca2	9829401	9829500	1.39836e-05	-16.1485
Ca2	3837251	3837400	3.59551e-56	-36.2158		Ca8	10409351	10409500	2.04579e-21	36.1137		Ca2	10128901	10129000	1.16719e-06	-18.5955
Ca2	3875101	3875250	2.77519e-19	-39.6163		Ca8	10956401	10956550	3.37155e-19	53.395		Ca2	10538401	10538500	1.95864e-05	-16.9175
Ca2	3883101	3883200	1.19558e-07	-25.111		Ca8	10956801	10956900	9.8102e-09	34.1837		Ca2	10630151	10630250	4.03207e-10	-21.6037
Ca2	5804651	5804750	8.20951e-21	-35.2839		Ca8	11028151	11028300	1.76572e-34	58.6593		Ca2	10813201	10813300	2.13882e-07	-16.166
Ca2	6011601	6011750	5.6619e-53	-63.1491		Ca8	11731151	11731250	2.64872e-07	30.5288		Ca2	11293651	11293750	7.33964e-06	-17.4734
Ca2	6193901	6194000	1.68925e-11	-34.9667		Ca8	12410001	12410150	9.40204e-10	30.4986		Ca2	11329201	11329350	6.6509e-07	-17.5796
Ca2	6346401	6346500	2.3516e-07	-33.1693		Ca8	12821151	12821300	7.14883e-08	29.7256		Ca2	11636901	11637000	5.28812e-06	-24.7297
Ca2	6397151	6397250	4.64992e-09	-27.263		Ca8	12895251	12895400	4.86058e-14	36.6024		Ca2	11996501	11996600	1.51995e-05	-20.6951
Ca2	6731801	6731900	5.87255e-08	-26.0966		Ca8	14869801	14869900	1.275e-13	27.6185		Ca2	12217651	12217750	3.27333e-09	-23.8871
Ca2	6920801	6920950	1.15823e-41	-53.7683		Ca8	15833351	15833500	3.2972e-15	39.3008		Ca2	12332751	12332850	1.2136e-05	-24.0038
Ca2	6920901	6921050	1.75936e-34	-50.687		Ca1	3801401	3801550	3.1447e-42	-31.8652		Ca2	12532501	12532600	5.35766e-07	-30.2387
Ca2	6938051	6938200	3.02714e-24	-49.8842		Ca1	3801551	3801700	4.87192e-24	-40.9508		Ca2	12823301	12823400	2.60473e-05	-15.2144
Ca2	7125901	7126100	4.95144e-30	-49.3707		Ca1	3801851	3801950	1.43228e-14	-43.8553		Ca2	12835801	12835900	6.35312e-10	-16.1371
Ca2	7138851	7138950	5.78127e-27	-61.3361		Ca1	7792651	7792750	3.98438e-12	-25.9363		Ca2	13232151	13232250	4.62182e-06	-15.0891
Ca2	8698351	8698450	4.07975e-12	-40.6294		Ca1	7792851	7793000	2.66491e-24	-32.5011		Ca2	13443251	13443350	1.77445e-05	-24.8705
Ca2	8698451	8698550	1.40672e-07	-30.9451		Ca1	8678351	8678500	1.96174e-08	-38.9026		Ca2	13456501	13456600	1.9622e-09	-33.3708
Ca2	9012101	9012300	1.47397e-11	-59.074		Ca1	11341051	11341150	1.79282e-15	-33.8615		Ca2	13512451	13512550	2.60104e-06	-26.7478
Ca2	9194701	9194850	2.00223e-19	-38.311		Ca1	14776651	14776750	4.66191e-07	-35.0119		Ca2	13512551	13512650	2.43435e-06	-22.5714
Ca2	9338051	9338150	8.29498e-40	-69.5652		Ca1	15642751	15642850	3.11708e-11	-32.0811		Ca2	13854251	13854350	1.86744e-05	-23.6594
Ca2	9491751	9491900	9.41393e-15	-30.6664		Ca1	17458001	17458100	3.09084e-17	-26.9697		Ca2	14060551	14060650	9.42442e-06	-22.561
Ca2	9726851	9726950	7.88453e-11	-25.1378		Ca1	17481701	17481800	1.01226e-15	-36.5385		Ca2	14099051	14099200	6.25072e-06	-16.6897
Ca2	9789051	9789150	4.74133e-15	-42.1404		Ca1	17483651	17483750	2.20216e-17	-33.8831		Ca2	14272301	14272400	2.09409e-05	-16.0582
Ca2	9835651	9835750	1.24632e-08	-31.3597		Ca1	17668351	17668450	1.86858e-07	-37.7927		Ca2	14542751	14542900	1.04906e-06	-26.3903
Ca2	9961301	9961400	4.35963e-26	-27.7778		Ca1	17737101	17737200	1.45516e-13	-32.2578		Ca2	14836251	14836350	6.42759e-06	-15.5464
Ca2	9965101	9965200	3.48921e-09	-27.5589		Ca1	19938401	19938500	1.8752e-20	-51.0261		Ca2	14836501	14836600	5.76936e-08	-22.3438
Ca2	10023101	10023200	2.46673e-16	-26.9819		Ca1	22182201	22182350	8.08081e-18	-32.4993		Ca2	15030151	15030250	1.05404e-07	-15.4485
Ca2	10025201	10025350	6.21935e-41	-30.9002		Ca1	23174451	23174600	3.12776e-21	-34.8421		Ca2	15102051	15102150	1.13194e-08	-26.4169
Ca2	10402701	10402850	1.16725e-70	-57.7553		Ca1	27018951	27019050	5.68789e-11	-27.2863		Ca2	15658451	15658600	9.32821e-06	-17.4629
Ca2	10518501	10518600	7.96874e-62	-58.3209		Ca1	27884601	27884700	4.73066e-14	-26.4151		Ca2	15953951	15954050	3.89655e-06	-16.9813
Ca2	10564201	10564300	6.8899e-09	-31.0705		Ca1	28042451	28042550	7.2956e-09	-34.7201		Ca2	16055051	16055200	2.08838e-05	-18.2254
Ca2	10575901	10576000	8.6575e-05	-25.2049		Ca1	28347351	28347450	1.37452e-16	-26.2615		Ca2	17131051	17131150	2.31011e-06	-15.4997
Ca2	11389401	11389500	2.52091e-17	-28.6713		Ca1	30257901	30258050	9.27299e-13	-30.6672		Ca2	17612601	17612700	2.44251e-05	-20.704
Ca2	12276551	12276650	1.17608e-10	-26.7414		Ca1	30917001	30917100	9.40458e-07	-27.2591		Ca2	17897251	17897400	2.24989e-07	-19.3152
Ca2	12357301	12357400	2.12482e-22	-29.5131		Ca1	31322501	31322700	3.4476e-17	-34.5778		Ca2	18005051	18005150	6.96543e-08	-15.3721
Ca2	13290851	13290950	9.66523e-11	-29.709		Ca1	31323251	31323400	1.22859e-32	-64.5534		Ca2	18392751	18392850	1.64973e-11	-18.9328
Ca2	13380801	13380900	3.67725e-11	-28.3093		Ca1	32243451	32243550	1.42773e-12	-28.3582		Ca2	18609201	18609300	6.76384e-06	-16.0724
Ca2	13381001	13381100	5.88836e-14	-28.6907		Ca1	32244501	32244650	8.85341e-17	-29.5372		Ca2	18679751	18679850	3.21597e-05	-16.1453
Ca2	13891751	13891850	7.61268e-09	-29.3048		Ca1	32245401	32245500	2.3642e-26	-35.5828		Ca2	18710301	18710400	1.06622e-05	-19.8102
Ca2	14256551	14256700	1.73978e-31	-28.8194		Ca1	32813201	32813300	2.03854e-05	-27.3562		Ca2	18721301	18721400	8.62358e-06	-22.7183
Ca2	14485101	14485200	6.86085e-18	-33.4044		Ca1	33187101	33187200	1.4513e-16	-32.8592		Ca2	18859401	18859500	9.373e-06	-18.3261
Ca2	14715201	14715350	1.05043e-13	-34.4887		Ca1	33187251	33187400	5.51945e-09	-29.2338		Ca2	18874551	18874700	2.81325e-07	-21.388
Ca2	14781751	14781850	2.07521e-11	-26.3151		Ca1	33446151	33446250	5.70489e-16	-42.4569		Ca2	18936651	18936750	7.88476e-06	-15.0827
Ca2	14829551	14829700	1.19619e-17	-31.0975		Ca1	34255351	34255500	6.02439e-23	-40.3393		Ca2	20211351	20211450	1.07269e-05	-15.1823
Ca2	14838751	14838950	6.21589e-13	-31.5151		Ca1	34756201	34756300	3.65807e-17	-34.8704		Ca2	20957251	20957350	9.1513e-06	-16.4316
Ca2	14867701	14867850	3.70797e-36	-37.3633		Ca1	35654351	35654450	4.50392e-10	-39.6502		Ca2	21028451	21028550	8.39512e-09	-18.3673
Ca2	15834401	15834500	6.90314e-19	-35.8104		Ca1	35960951	35961050	2.80145e-08	-28.7836		Ca2	21756301	21756400	1.24007e-07	-17.7506
Ca2	16012551	16012700	1.39196e-17	-49.3204		Ca1	37905201	37905350	2.57751e-17	-30.6263		Ca2	21962801	21962900	6.49622e-06	-19.1424
Ca2	16392551	16392650	5.91784e-07	-28.7619		Ca1	37905551	37905700	1.39223e-22	-26.4659		Ca2	22091301	22091400	3.67482e-12	-18.6988
Ca2	17017151	17017250	1.73735e-09	-37.2001		Ca1	37905701	37905800	3.81159e-13	-25.1762		Ca2	22114551	22114650	7.82756e-06	-21.25
Ca2	17423301	17423400	2.26105e-05	-30.2002		Ca1	38546301	38546400	1.46972e-29	-63.7945		Ca2	22320401	22320500	2.65587e-06	-20.2603
Ca2	17570051	17570150	1.17219e-22	-31.6121		Ca1	38558001	38558100	9.40251e-27	-32.7619		Ca2	22436101	22436200	4.33369e-06	-18.5501
Ca2	17579651	17579750	1.9906e-15	-32.3874		Ca1	40218551	40218650	2.49794e-15	-47.4218		Ca2	22852351	22852450	6.60073e-06	-21.9231
Ca2	18619551	18619700	7.70483e-30	-42.6343		Ca1	44700101	44700250	1.18373e-41	-49.474		Ca2	22914501	22914600	1.27845e-09	-18.7223
Ca2	18888851	18889000	1.25525e-31	-64.6685		Ca1	44700301	44700500	4.1161e-09	-41.7472		Ca2	23033151	23033250	1.7818e-05	-19.8849
Ca2	18928851	18928950	1.88823e-78	-79.1506		Ca1	44705251	44705400	7.82744e-08	-32.4702		Ca2	23473401	23473500	1.42086e-06	-23.6356
Ca2	19285651	19285750	2.07123e-11	-33.342		Ca1	45641751	45641850	7.78538e-26	-33.321		Ca2	23827101	23827200	1.16398e-11	-22.9505
Ca2	20436901	20437000	4.27653e-07	-25.0728		Ca1	45642001	45642150	1.00217e-26	-27.1875		Ca2	23839951	23840050	6.14288e-08	-24.7072
Ca2	21184651	21184750	5.75014e-14	-31.1163		Ca1	45643851	45643950	2.04272e-12	-34.0801		Ca2	24281201	24281300	9.64113e-06	-19.155
Ca2	22211601	22211700	2.12522e-08	-37.0564		Ca1	47004601	47004700	1.11502e-22	-52.6728		Ca2	24638701	24638800	7.53357e-06	-17.8712
Ca2	22376851	22376950	1.50555e-26	-60.0385		Ca2	1188801	1188950	6.86006e-11	-38.2936		Ca2	24685801	24685900	2.05467e-08	-16.7784
Ca2	22376951	22377100	2.43781e-22	-53.2216		Ca2	1252501	1252600	1.12709e-07	-27.306		Ca2	24686001	24686100	2.95185e-08	-15.9267
Ca2	22415601	22415750	2.21668e-57	-49.6742		Ca2	1400551	1400650	9.10211e-10	-38.8889		Ca2	24795901	24796000	1.17838e-05	-25.1318
Ca2	22771951	22772050	1.92625e-07	-26.5233		Ca2	3045451	3045550	6.37678e-09	-27.2096		Ca2	25148501	25148600	5.61043e-08	-25.2849
Ca2	23321401	23321550	7.31067e-07	-34.5522		Ca2	3611601	3611750	2.65358e-12	-39.732		Ca2	25702751	25702850	1.5609e-05	-15.4351
Ca2	23546101	23546200	1.20016e-06	-25.0961		Ca2	5060451	5060550	1.94821e-12	-44.4205		Ca2	26829151	26829250	3.29646e-06	-16.5393
Ca2	23850601	23850700	1.56736e-15	-50.1216		Ca2	6026801	6026900	2.10227e-10	-32.4723		Ca2	26837851	26837950	2.04158e-07	-21.5887
Ca2	24744501	24744650	6.85673e-30	-41.0222		Ca2	6568401	6568500	2.33882e-15	-32.9588		Ca2	26839301	26839450	4.40718e-06	-19.0492
Ca2	25435551	25435700	2.26082e-22	-30.5479		Ca2	6604801	6604900	5.19231e-09	-26.9321		Ca2	27114101	27114200	8.72909e-07	-17.0951
Ca2	27029151	27029250	4.77499e-13	-37.1503		Ca2	6612451	6612550	2.76707e-11	-38.6607		Ca2	27924051	27924150	2.73555e-05	-16.6604
Ca2	27226501	27226600	7.81073e-07	-25.4335		Ca2	8513451	8513550	2.15931e-27	-51.1398		Ca2	28782451	28782600	1.04209e-07	-25.737
Ca2	27284301	27284450	1.237e-70	-67.2456		Ca2	8728051	8728250	4.78016e-08	-28.9968		Ca2	29099501	29099650	7.21194e-06	-19.9614
Ca2	27373651	27373800	1.60371e-31	-46.341		Ca2	9472351	9472450	2.99483e-15	-43.2979		Ca2	29265251	29265350	1.38403e-06	-17.4578
Ca2	27472801	27472950	2.1462e-09	-28.6842		Ca2	9472451	9472650	2.70819e-22	-43.1149		Ca2	29665451	29665550	2.36731e-07	-18.0519
Ca2	27508751	27508900	1.71141e-55	-76.9532		Ca2	9847251	9847350	1.43102e-08	-26.0263		Ca2	29717151	29717250	7.05754e-08	-24.8677
Ca2	28225401	28225550	7.05774e-63	-61.9307		Ca2	10221001	10221150	3.70136e-15	-51.4925		Ca2	29774551	29774650	3.78626e-06	-16.7192
Ca2	28364801	28364900	4.31836e-14	-36.1803		Ca2	10518501	10518650	6.23342e-91	-88.3495		Ca2	29848201	29848350	1.66105e-05	-20.5292
Ca2	28390901	28391000	5.86619e-09	-25.4545		Ca2	10587651	10587750	3.45689e-10	-28.6009		Ca2	30729251	30729350	3.82684e-07	-25.1648
Ca2	28796951	28797050	1.98906e-18	-62.5974		Ca2	12595251	12595350	2.95858e-10	-34.4101		Ca2	32858301	32858400	6.93226e-06	-27.8769
Ca2	29005751	29005850	3.63117e-12	-25.3581		Ca2	13711751	13711850	1.33282e-15	-35.2967		Ca2	32972351	32972500	8.59932e-09	-29.117
Ca2	29016401	29016500	1.26963e-35	-37.4798		Ca2	14829551	14829700	3.74741e-12	-32.8966		Ca2	33406551	33406650	3.83828e-07	-17.5791
Ca2	29703401	29703600	1.0112e-15	-40.7953		Ca2	15177351	15177450	2.69886e-09	-26.0157		Ca2	33791201	33791300	3.15597e-05	-17.4224
Ca2	30120851	30120950	1.08382e-18	-34.8844		Ca2	15678451	15678600	1.97045e-16	-42.6343		Ca2	34835201	34835350	1.88903e-05	-16.2156
Ca2	30613551	30613650	1.20296e-07	-27.7681		Ca2	15768551	15768700	1.13212e-35	-33.7645		Ca2	35268001	35268100	5.56765e-07	-16.321
Ca2	30867851	30867950	1.96626e-16	-25.7152		Ca2	16241401	16241500	6.92574e-07	-26.6923		Ca2	35624051	35624150	1.12328e-06	-18.529
Ca2	30870751	30870900	1.21665e-14	-37.6316		Ca2	17424701	17424800	5.08001e-09	-30.1098		Ca2	35686551	35686650	4.81163e-06	-15.2076
Ca2	30901001	30901150	9.1028e-21	-30.0193		Ca2	18427351	18427500	2.5085e-10	-34.4351		Ca2	36281751	36281850	2.86755e-07	-15.3766
Ca2	30927451	30927550	0.000164224	-26.5917		Ca2	18427701	18427900	1.13641e-07	-47.8888		Ca3	49001	49150	3.01446e-07	16.4562
Ca2	31155351	31155450	1.76382e-15	-29.5318		Ca2	19163851	19163950	1.7024e-09	-26.7251		Ca3	93351	93450	3.21068e-06	26.5444
Ca2	31187651	31187850	1.18208e-39	-45.9593		Ca2	20259301	20259400	1.24787e-13	-43.7421		Ca3	121401	121550	1.05748e-07	23.4235
Ca2	31306051	31306200	1.7648e-11	-36.1945		Ca2	23313951	23314050	1.37272e-10	-25.1148		Ca3	944951	945050	7.00653e-06	21.8487
Ca2	32049451	32049550	1.24869e-14	-25.9181		Ca2	23314051	23314200	7.22201e-13	-31.0623		Ca3	2089951	2090100	3.95664e-10	25.5981
Ca2	32239351	32239450	1.82928e-08	-27.8568		Ca2	23314301	23314400	1.01185e-13	-26.3916		Ca3	2590701	2590800	2.27704e-05	25.457
Ca2	32285401	32285500	4.69366e-16	-27.1207		Ca2	23315651	23315750	8.1581e-07	-29.2208		Ca3	2671451	2671550	1.49392e-05	17.5904
Ca2	32410251	32410350	6.74634e-10	-31.1469		Ca2	23316201	23316300	1.64149e-16	-28.9291		Ca3	2854101	2854200	4.73203e-06	20.737
Ca2	32434601	32434700	2.38358e-32	-32.4723		Ca2	23346001	23346150	5.35931e-17	-32.2848		Ca3	2902951	2903050	1.39971e-07	16.5596
Ca2	32482001	32482100	1.53001e-07	-34.8839		Ca2	23346301	23346400	5.10487e-25	-42.7904		Ca3	3426201	3426300	4.43428e-06	15.4962
Ca2	32904251	32904350	4.97811e-14	-30.7471		Ca2	23346601	23346700	5.38851e-06	-26.0532		Ca3	3622401	3622500	9.90077e-06	15.3021
Ca2	33244501	33244600	9.36215e-16	-26.4686		Ca2	23347051	23347200	8.14273e-21	-38.1603		Ca3	5216301	5216400	1.90702e-05	17.4706
Ca2	33501101	33501200	4.103e-11	-45.0639		Ca2	23347751	23347950	1.32849e-07	-29.162		Ca3	5225701	5225850	4.01807e-10	22.4539
Ca2	33768401	33768500	6.54204e-25	-39.2		Ca2	23850451	23850600	9.40908e-09	-33.511		Ca3	5557801	5557900	2.04519e-06	22.1667
Ca2	33788901	33789000	8.92549e-21	-40.341		Ca2	23932201	23932300	2.45424e-10	-26.3751		Ca3	5564701	5564800	7.31819e-07	16.3072
Ca2	33805751	33805900	2.8194e-09	-32.827		Ca2	24222251	24222350	3.11455e-09	-27.518		Ca3	5778801	5778950	3.61452e-07	20.8156
Ca2	33858601	33858700	4.32939e-07	-30.1986		Ca2	24231601	24231800	2.94845e-11	-35.2851		Ca3	6955401	6955500	4.5765e-11	15.8307
Ca2	34268651	34268750	1.967e-11	-29.7893		Ca2	24232151	24232300	1.06959e-14	-31.1064		Ca3	7047151	7047250	1.16119e-07	15.1256
Ca2	34283101	34283200	9.51484e-09	-28.0668		Ca2	24232301	24232400	1.05513e-13	-30.7018		Ca3	7605301	7605400	6.33773e-07	15.1481
Ca2	34296201	34296350	9.30362e-15	-31.5049		Ca2	24232451	24232550	3.71632e-09	-40.4124		Ca3	7747701	7747800	5.19285e-07	16.9031
Ca2	34713501	34713600	1.23209e-07	-27.0301		Ca2	25154401	25154550	3.07105e-06	-28.2291		Ca3	9432451	9432550	3.25543e-07	15.88
Ca2	34887301	34887400	1.65856e-11	-32.236		Ca2	25163051	25163150	2.06258e-10	-29.4013		Ca3	9464551	9464700	6.62093e-06	21.7714
Ca2	35052251	35052400	6.67908e-23	-40.112		Ca2	25163451	25163650	1.66993e-42	-57.3969		Ca3	10730301	10730400	2.33313e-05	16.7321
Ca2	35163351	35163450	1.82179e-09	-30.2315		Ca2	25166951	25167050	7.81861e-12	-30.4414		Ca3	10824901	10825000	4.42922e-08	16.5455
Ca2	35188601	35188750	3.47477e-30	-51.3428		Ca2	25750101	25750200	1.07397e-12	-25.6288		Ca3	11081351	11081450	3.93382e-06	23.8247
Ca2	35479451	35479550	1.14036e-06	-28.8793		Ca2	26394001	26394150	5.35073e-22	-47.0209		Ca3	11323901	11324000	1.1882e-11	18.3446
Ca2	35641701	35641800	7.45166e-24	-49.3869		Ca2	27044151	27044250	5.37182e-05	-25.5159		Ca3	13838351	13838450	6.99727e-07	17.1673
Ca2	35678351	35678500	3.55118e-08	-25.132		Ca2	27472801	27472900	6.67748e-07	-26.3268		Ca3	14189101	14189250	8.03193e-08	21.7403
Ca2	35767851	35767950	4.70339e-09	-33.6964		Ca2	27540551	27540650	3.1747e-08	-26.5322		Ca3	14812151	14812300	4.07984e-12	20.6792
Ca2	35832851	35832950	4.67558e-22	-45.7447		Ca2	28192251	28192350	2.54752e-14	-31.4697		Ca3	15289801	15289900	1.04703e-08	19.4574
Ca2	35833001	35833100	1.78483e-49	-85.3933		Ca2	28837351	28837450	6.57016e-07	-27.0954		Ca3	15373151	15373250	2.85195e-05	24.2063
Ca2	36556651	36556750	2.95729e-07	-25.5034		Ca2	29593001	29593100	3.77224e-06	-25.5049		Ca3	15668551	15668650	2.28135e-05	18.7237
Ca2	36556901	36557000	9.86286e-22	-53.0555		Ca2	30925451	30925650	1.89478e-10	-34.0102		Ca3	15822801	15822900	2.07885e-06	25.711
Ca3	979151	979250	3.31092e-15	41.6931		Ca2	31187651	31187800	2.14811e-21	-30.4503		Ca3	15960101	15960200	2.52031e-05	16.8946
Ca3	981751	981900	4.08884e-09	31.6504		Ca2	32493101	32493200	1.80651e-07	-30.7992		Ca3	16652601	16652700	7.71589e-06	18.0087
Ca3	988951	989050	1.81455e-12	37.5776		Ca2	32506251	32506350	1.47747e-09	-27.6786		Ca3	16673101	16673200	2.22856e-10	25.9313
Ca3	1152051	1152250	2.10884e-25	44.0062		Ca2	32510251	32510400	1.09976e-19	-29.05		Ca3	16887401	16887550	5.60667e-10	19.5671
Ca3	1735101	1735200	8.07405e-27	52.3637		Ca2	32510501	32510650	1.08003e-08	-26.4373		Ca3	16911251	16911400	4.87888e-07	21.1024
Ca3	2161901	2162000	4.28778e-23	32.2891		Ca2	33302351	33302450	7.93263e-09	-34.5662		Ca3	16952801	16952900	1.36002e-05	16.2952
Ca3	2670051	2670250	2.90002e-08	30.3994		Ca2	33302601	33302800	1.42335e-27	-35.9997		Ca3	16956201	16956300	1.88582e-09	16.363
Ca3	2974151	2974250	3.93279e-10	34.2105		Ca2	33302801	33302950	3.26438e-15	-35.7682		Ca3	16988051	16988150	2.47343e-05	15.3619
Ca3	4911151	4911300	9.00751e-16	35.5266		Ca2	33303801	33303900	1.74511e-09	-27.1413		Ca3	17222051	17222150	3.90044e-08	25.0196
Ca3	5158201	5158300	1.34087e-09	26.0281		Ca2	33304101	33304250	1.67276e-18	-28.0456		Ca3	17310301	17310400	1.00888e-05	15.7898
Ca3	5567801	5567900	7.54994e-23	26.0816		Ca2	33776351	33776450	1.63687e-09	-27.2698		Ca3	17417851	17417950	3.07371e-11	18.0922
Ca3	6812301	6812450	1.76697e-11	28.996		Ca2	33805801	33805950	1.40081e-10	-32.6355		Ca3	17480901	17481000	3.07668e-05	16.6465
Ca3	6840051	6840150	1.62109e-09	36.2667		Ca2	33893201	33893300	9.53309e-15	-27.5248		Ca3	17645001	17645150	1.31507e-07	18.6034
Ca3	6934801	6934900	1.43745e-22	34.7		Ca2	34515951	34516050	4.31953e-07	-26.7626		Ca3	18009701	18009800	6.80713e-06	17.2334
Ca3	7995601	7995750	5.40349e-16	29.1358		Ca2	35703501	35703650	2.80211e-15	-33.095		Ca3	18269301	18269400	3.25835e-05	15.5821
Ca3	8940301	8940450	1.05834e-06	29.3047		Ca2	36515251	36515400	1.03234e-06	-27.3528		Ca3	18459201	18459300	6.85942e-07	19.1597
Ca3	9089001	9089150	7.96081e-13	30.4196		Ca2	36515651	36515800	1.73186e-16	-28.3687		Ca3	18578201	18578300	1.68505e-05	24.6132
Ca3	9294751	9294900	7.06615e-12	29.9718		Ca2	36515801	36515950	2.45129e-12	-34.7599		Ca3	18721601	18721750	3.42034e-10	24.0112
Ca3	9475801	9475900	1.38485e-16	28.6047		Ca2	36613101	36613200	1.32972e-06	-32.1809		Ca3	18920701	18920850	3.67869e-10	19.1103
Ca3	10434401	10434500	6.76913e-10	30.7534		Ca3	972551	972750	1.24066e-09	-32.3554		Ca3	18954251	18954350	2.8125e-05	15.0486
Ca3	10999601	10999700	1.0625e-20	33.7083		Ca3	972751	972850	4.04052e-10	-25.1264		Ca3	19018951	19019100	9.71654e-08	17.7839
Ca3	13420201	13420400	7.52105e-16	32.7877		Ca3	1107951	1108050	1.37722e-06	-30.5418		Ca3	19899251	19899350	1.78249e-06	16.1062
Ca3	14474601	14474700	2.46968e-21	41.6712		Ca3	1450001	1450150	2.68403e-54	-57.8803		Ca3	19949051	19949150	5.4883e-07	25.3672
Ca3	15673001	15673100	8.28731e-15	32.7687		Ca3	1918151	1918300	4.61737e-10	-27.9834		Ca3	20015351	20015450	7.44583e-09	24.8846
Ca3	16217101	16217200	1.54994e-07	31.2851		Ca3	2670251	2670400	1.40534e-20	-35.5626		Ca3	20020101	20020250	1.86236e-05	17.624
Ca3	16682301	16682400	6.79322e-13	30.3783		Ca3	7544201	7544300	4.11097e-09	-27.3147		Ca3	20038101	20038200	1.7088e-08	21.7734
Ca3	17732401	17732500	5.08271e-15	36.0276		Ca3	8904501	8904600	2.02881e-09	-39.1779		Ca3	20074501	20074600	5.20461e-07	19.7904
Ca3	17745351	17745450	1.54813e-08	31.1134		Ca3	9121351	9121500	1.30492e-06	-30.811		Ca3	20125201	20125300	3.72779e-06	24.135
Ca3	18055001	18055100	1.19848e-06	34.6606		Ca3	11324251	11324350	9.94497e-72	-87.4224		Ca3	20136501	20136600	3.18354e-05	18.6411
Ca3	18078851	18079000	1.41292e-16	30.3581		Ca3	12658051	12658200	3.44882e-06	-28.9448		Ca3	20280301	20280400	1.21218e-05	25.4545
Ca3	18540151	18540250	1.49605e-15	40.2361		Ca3	12931551	12931650	3.57215e-18	-40.8596		Ca3	20461601	20461700	1.19341e-05	21.5279
Ca3	18541051	18541150	1.5077e-21	33.2942		Ca3	12931901	12932000	6.19028e-06	-33.1373		Ca3	20963801	20963900	1.40471e-05	25.7837
Ca3	19758601	19758700	7.55768e-17	31.1383		Ca3	14353151	14353300	2.13787e-18	-46.5587		Ca3	21225651	21225750	6.41848e-06	15.5403
Ca3	19848401	19848500	2.37356e-15	39.625		Ca3	18620751	18620900	3.05478e-22	-44.6849		Ca3	21440701	21440800	4.98043e-07	16.8952
Ca3	20102901	20103000	1.59363e-13	34.0714		Ca3	18851501	18851600	2.31279e-19	-45.7624		Ca3	21529751	21529850	1.26943e-06	18.6667
Ca3	21069851	21069950	5.27131e-15	37.8271		Ca3	18851701	18851800	4.64723e-24	-54.0052		Ca3	22092701	22092800	9.51348e-06	16.163
Ca3	21385301	21385400	4.13491e-11	30.9736		Ca3	19436951	19437050	7.66394e-10	-27.4747		Ca3	22339501	22339600	1.08759e-05	18.2545
Ca3	21443251	21443350	5.53381e-07	26.7255		Ca3	19654301	19654450	4.91586e-07	-27.0809		Ca3	22491951	22492050	2.08837e-08	17.3228
Ca3	21744401	21744550	6.42235e-19	30.9723		Ca3	19713401	19713500	3.57939e-10	-30.9697		Ca3	22563551	22563650	5.2623e-06	16.1628
Ca3	22362201	22362350	4.00141e-08	29.3627		Ca3	19900101	19900300	2.60765e-41	-81.2561		Ca3	22583801	22583950	4.12693e-08	22.0789
Ca3	22529001	22529100	2.03737e-07	25.0692		Ca3	21739051	21739200	8.70735e-08	-35.557		Ca3	22701201	22701400	6.62081e-13	30.1205
Ca3	23197951	23198100	5.47091e-17	43.4525		Ca3	22183701	22183800	1.96228e-07	-30.1601		Ca3	22760601	22760750	2.51782e-08	21.1203
Ca3	23569201	23569300	9.51304e-17	31.6416		Ca3	25872101	25872300	5.72957e-08	-30.8099		Ca3	22891251	22891350	3.27613e-06	17.0635
Ca3	24136201	24136300	2.3283e-06	27.0166		Ca3	28995601	28995700	1.11557e-11	-26.032		Ca3	23111801	23111900	2.35849e-08	16.7018
Ca3	24941651	24941750	5.88242e-08	34.0897		Ca3	30209351	30209450	6.28924e-11	-37.9866		Ca3	23579001	23579100	3.01471e-09	25.7289
Ca3	25175401	25175500	4.71279e-07	26.7729		Ca3	32576251	32576350	4.4444e-11	-32.9966		Ca3	23652401	23652500	3.99042e-06	15.5672
Ca3	25278601	25278750	1.12448e-14	40.0537		Ca3	32576451	32576600	1.55129e-28	-33.9831		Ca3	23658851	23658950	1.27772e-05	17.9069
Ca3	25384701	25384800	8.8191e-13	41.8154		Ca3	32576601	32576700	4.73793e-10	-27.5		Ca3	23761651	23761750	1.50617e-05	24.2803
Ca3	25911101	25911200	5.42987e-09	32.2615		Ca3	32576751	32576850	2.20369e-15	-28.6659		Ca3	23789351	23789550	5.5427e-07	35.6871
Ca3	25952901	25953000	7.02681e-06	32.0779		Ca3	32580701	32580800	1.86988e-13	-34.0145		Ca3	23865751	23865900	1.68698e-05	19.2503
Ca3	26228151	26228250	8.68582e-26	40.5286		Ca3	32580801	32580900	3.35905e-22	-38.4615		Ca3	24233401	24233500	3.11561e-06	19.0729
Ca3	26446801	26446900	1.03862e-16	40.7164		Ca3	32582051	32582150	7.92358e-07	-26.1092		Ca3	24644451	24644550	3.46418e-12	44.6545
Ca3	26770401	26770550	7.99255e-18	30.2969		Ca3	34984751	34984900	3.78073e-06	-29.1231		Ca3	24754651	24754750	1.07831e-05	15.2187
Ca3	27276951	27277050	1.81641e-09	26.5111		Ca3	35619751	35619850	5.45424e-07	-27.987		Ca3	24818901	24819000	9.72686e-06	17.598
Ca3	27341401	27341500	3.16106e-09	27.7983		Ca3	37972951	37973100	3.51128e-19	-50.0314		Ca3	24876101	24876250	1.01663e-05	16.2491
Ca3	27349801	27349900	5.52238e-25	36.5808		Ca3	37973201	37973350	2.92619e-15	-48.4322		Ca3	24902151	24902250	1.50494e-06	19.6565
Ca3	27462651	27462750	1.62883e-17	45.6029		Ca3	37973451	37973550	5.16533e-10	-36.7505		Ca3	25012701	25012800	1.20915e-09	16.9286
Ca3	27466351	27466450	4.20333e-05	30.3288		Ca4	77251	77350	1.3311e-37	-30.0793		Ca3	25019501	25019600	2.53256e-05	16.0488
Ca3	27561351	27561450	2.31968e-08	27.3666		Ca4	77401	77550	6.40354e-23	-32.9569		Ca3	25282401	25282500	6.02936e-08	15.5525
Ca3	27984801	27984900	3.58289e-12	28.4179		Ca4	77651	77750	1.76681e-19	-46.7647		Ca3	25520901	25521000	1.40831e-05	32.0054
Ca3	28375251	28375350	1.79369e-31	50.1124		Ca4	1459801	1459900	3.71626e-17	-31.1874		Ca3	25716701	25716800	7.43519e-06	17.7753
Ca3	28584551	28584650	2.45146e-12	25.17		Ca4	2423251	2423450	9.90834e-08	-37.3314		Ca3	26153651	26153750	7.39767e-06	16.4509
Ca3	28706451	28706600	1.00084e-24	33.1932		Ca4	5199551	5199700	4.04306e-07	-30.3829		Ca3	26246951	26247050	1.69334e-06	18.3376
Ca3	29041351	29041450	2.34275e-11	27.8846		Ca4	13546001	13546100	6.488e-09	-33.8295		Ca3	26310151	26310300	4.07006e-06	22.8768
Ca3	29141851	29142000	1.39425e-13	30.2876		Ca4	18398251	18398350	2.81214e-07	-28.2026		Ca3	26379651	26379750	9.34779e-08	33.4343
Ca3	29183051	29183150	2.95538e-07	28.9405		Ca4	18498551	18498700	3.62173e-24	-40.0699		Ca3	26453201	26453300	6.24225e-06	26.935
Ca3	29377151	29377250	1.88199e-13	33.7992		Ca4	18498651	18498850	1.26274e-10	-35.3113		Ca3	27000301	27000400	1.65041e-07	22.3876
Ca3	29497151	29497250	4.31147e-19	41.6425		Ca4	19146701	19146800	1.08993e-09	-27.2842		Ca3	27142151	27142300	7.53895e-07	39.7267
Ca3	30018201	30018300	2.31263e-22	32.2146		Ca4	22752151	22752250	2.06777e-07	-29.1388		Ca3	27376851	27376950	5.0151e-07	17.3707
Ca3	30310801	30310900	1.07853e-72	48.9244		Ca4	22915351	22915500	2.85646e-30	-50.2536		Ca3	27747851	27747950	6.57752e-07	16.0299
Ca3	30660901	30661050	8.67207e-16	45.5978		Ca4	22915451	22915650	2.90312e-36	-58.2218		Ca3	27901751	27901850	9.38899e-07	18.9423
Ca3	30756701	30756800	1.66281e-09	29.4049		Ca4	24233801	24233950	3.63266e-14	-37.8896		Ca3	28276101	28276200	2.09282e-05	19.1473
Ca3	30764851	30764950	5.18163e-10	26.2971		Ca4	24527851	24527950	5.74154e-10	-30.9989		Ca3	28338701	28338850	9.16832e-06	23.31
Ca3	30881351	30881450	6.69172e-20	31.2349		Ca4	24528051	24528150	1.28897e-14	-35.0272		Ca3	28448601	28448800	6.41265e-07	21.3794
Ca3	31432701	31432800	9.22138e-06	28.0371		Ca4	26747051	26747200	2.71326e-12	-39.5494		Ca3	28590201	28590300	1.29437e-06	28.0606
Ca3	31676501	31676650	4.40305e-24	49.7614		Ca4	27388201	27388350	4.98876e-12	-28.8245		Ca3	28653101	28653300	4.0155e-17	35.5111
Ca3	31770751	31770850	9.3326e-18	31.5053		Ca4	29290851	29290950	9.80999e-16	-28.8139		Ca3	28726951	28727050	8.64653e-06	16.2322
Ca3	32066151	32066300	4.48451e-15	29.0781		Ca4	29291201	29291300	5.5356e-15	-37.3525		Ca3	28777951	28778050	1.61763e-05	17.8081
Ca3	32474601	32474700	1.89259e-12	35.2589		Ca4	35106751	35106850	3.95344e-13	-35.6281		Ca3	28792401	28792500	2.82473e-05	17.9919
Ca3	32502101	32502200	2.52099e-16	48.951		Ca4	36015651	36015800	1.39754e-12	-31.4916		Ca3	28804651	28804750	3.06055e-07	34.9368
Ca3	32661151	32661250	5.84119e-29	41.2421		Ca4	39378851	39379000	1.70161e-09	-30.4957		Ca3	28875401	28875500	5.22649e-11	20.6565
Ca3	32804801	32804950	4.44023e-13	31.1614		Ca4	40213401	40213500	2.89325e-07	-32.281		Ca3	29051301	29051400	4.49019e-07	20.8193
Ca3	33395601	33395700	1.46072e-05	32.027		Ca5	2163801	2163950	7.69408e-07	-27.7909		Ca3	29126101	29126200	1.92988e-05	15.2539
Ca3	33736651	33736800	2.89122e-45	88.8192		Ca5	3373001	3373100	1.69493e-14	-35.0384		Ca3	29148801	29148900	3.08748e-06	21.4795
Ca3	33768451	33768600	1.63741e-14	30.0367		Ca5	3751451	3751550	6.73345e-08	-25.9989		Ca3	29332751	29332850	1.33501e-05	22.0792
Ca3	33911851	33912000	1.89452e-29	27.3761		Ca5	7579451	7579600	2.44014e-35	-36.0791		Ca3	29534551	29534650	1.72202e-07	25.1509
Ca3	34855401	34855500	8.8887e-09	34.3343		Ca5	9919501	9919600	5.82836e-12	-30.4838		Ca3	29834051	29834150	8.22699e-06	19.2319
Ca3	35568451	35568550	8.11833e-15	45.2928		Ca5	10471151	10471300	2.0219e-12	-33.4657		Ca3	29993051	29993150	9.14822e-07	22.2798
Ca3	35568901	35569050	1.72009e-32	57.7475		Ca5	10828501	10828650	1.93588e-18	-25.0149		Ca3	30088501	30088600	1.20766e-05	21.2767
Ca3	35717701	35717850	1.49315e-64	37.0119		Ca5	11110651	11110750	1.5363e-15	-32.2924		Ca3	30096701	30096850	7.75228e-12	22.9012
Ca3	35808451	35808550	3.92483e-21	35.7657		Ca5	11193251	11193350	4.23208e-21	-40.3275		Ca3	30108501	30108600	1.02258e-05	20.2622
Ca3	36568551	36568650	2.96483e-10	31.1983		Ca5	11193351	11193500	2.26546e-13	-28.9785		Ca3	30110551	30110650	4.67658e-06	34.0115
Ca3	36594151	36594250	3.63189e-12	32.0299		Ca5	11773651	11773800	1.51977e-10	-29.3294		Ca3	30242751	30242850	3.1807e-12	24.9457
Ca3	36650551	36650700	7.84343e-21	35.6809		Ca5	12180551	12180650	2.55405e-11	-28.1844		Ca3	30352051	30352150	9.13465e-07	21.6207
Ca3	36882501	36882600	2.34879e-25	28.9185		Ca5	12430151	12430300	6.90274e-06	-26.6723		Ca3	30495451	30495550	3.07581e-15	36.9342
Ca3	36903451	36903550	1.82368e-06	25.8569		Ca5	12583301	12583400	3.69025e-07	-29.2149		Ca3	30816051	30816150	2.15489e-05	16.7531
Ca3	36928151	36928300	6.04299e-40	56.5695		Ca5	17415451	17415600	3.84347e-18	-32.5788		Ca3	30886651	30886750	1.57583e-05	20.5999
Ca3	37226051	37226150	6.85656e-05	29.5652		Ca5	17415601	17415800	4.05563e-11	-32.1606		Ca3	31055001	31055150	3.98574e-09	20.3324
Ca3	37237101	37237250	2.79148e-20	40.1303		Ca5	17422701	17422800	3.63552e-09	-38.031		Ca3	31233301	31233400	6.05568e-09	16.361
Ca3	37565101	37565200	5.53584e-12	28.344		Ca5	17423001	17423150	1.49969e-14	-25.3177		Ca3	31679401	31679500	8.52665e-07	16.1536
Ca3	37598201	37598300	1.49963e-13	34.668		Ca5	20311651	20311750	8.68768e-14	-45.6383		Ca3	31905001	31905100	2.32456e-06	18.4259
Ca3	37636301	37636400	2.09246e-20	49.0449		Ca5	21817901	21818000	1.0994e-12	-29.2108		Ca3	32001501	32001600	5.79681e-07	17.223
Ca3	37695651	37695800	3.90483e-12	35.0347		Ca5	22253401	22253550	2.19004e-07	-26.8222		Ca3	32092301	32092400	1.99888e-05	17.8675
Ca3	38031801	38031900	2.65253e-16	34.9206		Ca5	22937451	22937550	2.20065e-08	-29.5392		Ca3	32412801	32412900	1.31245e-05	16.5217
Ca3	38086001	38086100	2.44186e-15	34.4787		Ca5	22940001	22940100	3.75551e-07	-32.9078		Ca3	32720651	32720850	1.10576e-06	25.2851
Ca3	38111201	38111300	1.7784e-12	28.3989		Ca5	24529401	24529500	4.94391e-06	-28.1239		Ca3	32816351	32816450	8.04697e-07	17.0756
Ca3	38237601	38237700	2.3691e-05	25.6485		Ca5	25548951	25549100	4.07076e-08	-33.3986		Ca3	32871101	32871200	2.85934e-05	16.8551
Ca3	38275751	38275850	1.38636e-32	41.3988		Ca5	26589651	26589750	9.75609e-07	-30.5263		Ca3	32903551	32903650	8.74102e-06	15.873
Ca3	38374151	38374250	6.74526e-08	25.4398		Ca5	38678651	38678750	6.42468e-07	-27.2797		Ca3	33015651	33015750	8.23806e-15	31.657
Ca3	38385951	38386050	7.69545e-09	26.1885		Ca5	38680851	38681000	3.75296e-19	-34.7706		Ca3	33566651	33566750	2.47549e-05	19.7315
Ca3	38435401	38435500	1.6944e-05	26.1993		Ca5	38681551	38681700	5.42541e-30	-26.0984		Ca3	33745851	33745950	2.72001e-06	19.3697
Ca3	38471851	38471950	1.09675e-08	29.9351		Ca5	39052901	39053000	8.6419e-17	-29.3494		Ca3	33784601	33784700	3.32164e-07	17.5533
Ca3	38568801	38568900	2.22984e-10	34.199		Ca5	39443951	39444050	9.58312e-09	-26.2238		Ca3	33934601	33934700	3.33334e-07	17.3902
Ca3	38829651	38829750	2.91457e-11	33.434		Ca5	41773451	41773550	6.64083e-10	-30.7182		Ca3	33949651	33949750	5.55032e-06	17.8735
Ca3	38885051	38885150	3.15595e-20	47.5053		Ca5	43750351	43750450	6.21546e-16	-49.0093		Ca3	34761901	34762000	1.26727e-06	22.1705
Ca3	39050301	39050450	7.56658e-15	40.4297		Ca5	44601451	44601550	2.22203e-14	-30.7086		Ca3	34767551	34767650	1.40446e-06	19.2609
Ca3	39104701	39104800	4.38149e-19	33.5803		Ca5	44916201	44916350	6.11205e-10	-31.199		Ca3	34897151	34897250	2.50381e-05	17.6857
Ca3	39120201	39120300	2.50188e-07	28.1579		Ca6	1494901	1495050	2.69411e-11	-32.7781		Ca3	34918051	34918150	9.04552e-07	23.9504
Ca3	39236751	39236900	5.73053e-07	26.7436		Ca6	3054701	3054850	1.84872e-14	-49.9685		Ca3	35052451	35052600	6.97691e-14	30.0256
Ca3	39283451	39283550	1.61693e-09	27.4194		Ca6	8835201	8835400	4.52462e-40	-46.3506		Ca3	35511201	35511300	3.03098e-05	15.1919
Ca3	39372901	39373050	6.05252e-10	28.4952		Ca6	12379651	12379750	2.62654e-06	-26.1058		Ca3	35526801	35526900	9.67613e-07	15.0209
Ca3	39467401	39467500	1.12335e-13	29.6507		Ca6	15682501	15682600	7.38e-07	-31.7028		Ca3	35536651	35536750	1.4914e-05	21.6263
Ca3	39734601	39734700	9.87959e-12	27.263		Ca6	17388151	17388250	2.83383e-35	-37.1685		Ca3	35614551	35614650	3.45514e-09	18.0754
Ca3	39735601	39735700	1.13174e-07	34.2079		Ca6	17388651	17388750	1.44371e-13	-25.297		Ca3	35665751	35665850	6.26094e-08	28.7361
Ca3	39791151	39791250	9.12226e-22	45.7516		Ca6	21303651	21303750	2.64984e-11	-32.7381		Ca3	35793351	35793450	7.01902e-06	15.4775
Ca3	57051	57200	1.87986e-23	-45.7472		Ca6	24841651	24841750	5.65875e-11	-34.4514		Ca3	36385801	36385950	1.5524e-13	21.4602
Ca3	62401	62500	1.33821e-19	-61.4302		Ca6	25615101	25615200	6.85551e-25	-32.5843		Ca3	36534201	36534350	4.51129e-06	17.0393
Ca3	165551	165700	2.49166e-12	-32.7892		Ca6	27183351	27183550	4.67716e-11	-30.0607		Ca3	36534751	36534900	2.62548e-05	18.4245
Ca3	207101	207200	2.39615e-29	-62.6577		Ca6	28138451	28138600	5.38174e-11	-45.0021		Ca3	36724751	36724850	1.69602e-07	18.0535
Ca3	236001	236150	7.41504e-24	-41.433		Ca6	31483551	31483700	6.95319e-26	-51.3716		Ca3	36773501	36773650	1.32544e-06	17.3112
Ca3	771051	771150	1.54657e-09	-25.0887		Ca6	32261701	32261800	3.89712e-20	-31.888		Ca3	37038551	37038650	4.31358e-06	27.402
Ca3	972551	972650	2.10013e-07	-30.9114		Ca6	37589701	37589800	2.43051e-07	-26.7509		Ca3	37792151	37792250	2.48958e-07	22.7205
Ca3	1778501	1778600	6.45094e-14	-28.8175		Ca6	39019751	39019900	8.15926e-18	-28.4941		Ca3	37889701	37889800	5.22693e-08	28.8961
Ca3	2238251	2238350	2.96487e-31	-73.8303		Ca6	41739701	41739800	4.46842e-06	-27.5121		Ca3	37999901	38000000	1.85413e-05	18.5635
Ca3	2829651	2829750	1.03747e-06	-29.3706		Ca6	42013051	42013150	1.60275e-08	-31.2397		Ca3	38099751	38099850	6.64707e-06	26.4638
Ca3	2880501	2880650	8.99513e-39	-42.7315		Ca6	44950801	44950950	4.17453e-13	-47.074		Ca3	38270801	38270900	2.86502e-05	15.2639
Ca3	3436801	3436950	1.02829e-09	-39.3765		Ca6	45110501	45110600	2.15102e-17	-44.0511		Ca3	38312401	38312550	4.756e-07	25.4464
Ca3	3936951	3937050	3.06235e-10	-28.4569		Ca6	46964801	46964900	1.18135e-22	-39.0463		Ca3	38647401	38647600	8.68306e-10	24.578
Ca3	4161651	4161750	4.7665e-13	-29.0128		Ca6	46977301	46977400	3.6549e-16	-26.6601		Ca3	38657001	38657100	2.41205e-05	15.6522
Ca3	4178301	4178400	7.39021e-22	-48.1013		Ca6	47815351	47815450	4.08532e-06	-29.1505		Ca3	39699501	39699650	2.87115e-05	20.6152
Ca3	4518451	4518550	1.33825e-05	-26.6168		Ca6	48244251	48244350	5.17397e-09	-29.1919		Ca3	662201	662350	1.56691e-06	-16.1715
Ca3	4920701	4920850	5.98043e-26	-34.3172		Ca6	49741501	49741650	1.72804e-21	-45.0995		Ca3	2097751	2097850	8.77831e-07	-16.615
Ca3	4920851	4921000	2.44145e-30	-33.302		Ca6	49741651	49741750	5.4745e-09	-38.9898		Ca3	2569951	2570050	3.05235e-05	-15.849
Ca3	5189401	5189500	1.49392e-22	-27.2968		Ca6	49741751	49741850	6.45759e-33	-74.6736		Ca3	2902201	2902300	6.19273e-09	-22.0038
Ca3	5348151	5348250	1.24992e-10	-27.5862		Ca6	49898401	49898550	3.05061e-37	-56.8525		Ca3	2973551	2973650	1.12492e-05	-15.3996
Ca3	5828901	5829000	1.01686e-12	-32.7926		Ca6	49898601	49898750	6.55771e-54	-43.8434		Ca3	3049101	3049300	9.86302e-16	-24.4551
Ca3	6250151	6250250	1.5164e-11	-40.4386		Ca6	50407601	50407700	5.11441e-07	-25.2366		Ca3	3606901	3607000	1.46135e-05	-17.7759
Ca3	6417051	6417200	2.85174e-26	-32.3902		Ca6	51162001	51162150	4.75043e-19	-34.2434		Ca3	3886801	3886950	7.21185e-07	-18.8857
Ca3	6932701	6932850	1.9429e-13	-56.108		Ca6	52856101	52856200	1.85924e-19	-27.3026		Ca3	3922551	3922650	7.13175e-06	-17.8338
Ca3	6945751	6945900	1.84178e-24	-37.2492		Ca6	55961051	55961150	3.85194e-16	-53.6092		Ca3	4170851	4170950	1.53011e-10	-28.7582
Ca3	6955451	6955600	2.36227e-25	-60.3153		Ca6	56860901	56861000	5.69187e-11	-25.6021		Ca3	4188801	4188900	1.85931e-05	-16.3037
Ca3	7624801	7624950	3.51632e-131	-51.6474		Ca7	2436251	2436400	5.7163e-08	-35.4095		Ca3	4205351	4205450	1.15763e-09	-35.5449
Ca3	7697151	7697250	4.69407e-11	-28.8077		Ca7	3613151	3613250	2.62668e-14	-41.8889		Ca3	4213151	4213250	2.44506e-07	-15.7622
Ca3	8563901	8564000	6.40254e-47	-26.369		Ca7	11656001	11656150	2.55254e-10	-38.7672		Ca3	4331901	4332000	3.1542e-08	-28.3727
Ca3	9143701	9143800	1.15572e-10	-29.697		Ca7	14502801	14502950	1.58109e-06	-26.5377		Ca3	4425901	4426000	1.05894e-07	-24.8249
Ca3	9342951	9343050	2.71775e-10	-25.7259		Ca7	14818001	14818200	1.42331e-18	-40.2717		Ca3	4623951	4624050	3.80152e-06	-24.1316
Ca3	10201251	10201400	8.05448e-36	-47.5736		Ca7	22335301	22335400	3.30961e-10	-31.1224		Ca3	4712151	4712250	7.48376e-06	-18.0124
Ca3	11229401	11229500	1.72776e-22	-44.8432		Ca7	22673251	22673400	9.06789e-18	-32.247		Ca3	4716351	4716450	1.61762e-06	-17.402
Ca3	11324501	11324650	5.40198e-27	-39.6354		Ca7	22884751	22884850	3.18885e-07	-32.2713		Ca3	5014951	5015050	2.32466e-06	-19.9057
Ca3	12062501	12062650	4.96116e-14	-28.9357		Ca7	24093701	24093800	4.45723e-07	-35.5487		Ca3	5033501	5033600	4.07529e-06	-15.1731
Ca3	12229401	12229500	6.05301e-11	-29.5971		Ca7	24094451	24094600	1.38828e-09	-30.2937		Ca3	5394801	5394900	2.74614e-07	-17.9729
Ca3	12245151	12245300	1.6933e-27	-54.0491		Ca7	25961051	25961150	5.39996e-19	-47.8333		Ca3	6732101	6732200	3.2945e-05	-17.0477
Ca3	12245451	12245550	5.24237e-10	-32.4763		Ca7	31701701	31701800	1.40953e-17	-33.0789		Ca3	6815201	6815300	1.92264e-14	-17.6851
Ca3	12339101	12339200	2.04808e-06	-26.7184		Ca7	33103551	33103700	2.76585e-29	-38.6238		Ca3	6858451	6858550	2.37604e-07	-21.0383
Ca3	12599251	12599400	8.50629e-21	-48.8566		Ca7	33103651	33103800	2.62021e-36	-35.3748		Ca3	7140701	7140800	1.07343e-10	-19.8023
Ca3	14520401	14520500	8.26396e-21	-41.0411		Ca7	33103801	33103950	2.00126e-24	-33.9373		Ca3	7319551	7319650	2.57474e-05	-17.0723
Ca3	15205101	15205200	1.22532e-07	-28.2817		Ca7	34138651	34138800	6.6374e-10	-31.2543		Ca3	7522301	7522400	7.48658e-06	-17.7868
Ca3	15710851	15711000	1.29843e-34	-65.8044		Ca7	35145751	35145900	1.23429e-10	-35.6206		Ca3	7578601	7578800	2.83914e-05	-22.721
Ca3	15758201	15758350	4.37341e-28	-38.1223		Ca7	36309451	36309600	1.71684e-16	-36.5506		Ca3	8008401	8008500	1.42969e-08	-24.7539
Ca3	15807151	15807300	1.15485e-34	-43.9419		Ca7	37188351	37188450	1.96639e-06	-29.1209		Ca3	8451801	8451900	1.92929e-05	-19.4822
Ca3	16420951	16421050	1.40073e-37	-71.8766		Ca7	37188751	37188850	1.68298e-08	-33.1048		Ca3	8463951	8464050	2.19963e-05	-15.8374
Ca3	16764851	16764950	1.04805e-06	-25.4135		Ca7	37728101	37728200	3.14749e-32	-46.7486		Ca3	9402351	9402450	7.97525e-08	-32.7452
Ca3	17265701	17265800	7.53039e-09	-30.1836		Ca7	43059301	43059400	2.55238e-12	-34.1667		Ca3	9562351	9562450	2.15526e-07	-18.5507
Ca3	17683701	17683850	4.90768e-07	-35.4799		Ca7	46242051	46242150	8.07995e-11	-26.3181		Ca3	10493951	10494100	8.39081e-06	-16.4176
Ca3	17779251	17779350	6.50241e-24	-47.2575		Ca7	48235851	48236050	7.27943e-15	-35.9496		Ca3	10628451	10628600	3.64323e-08	-24.9149
Ca3	17861501	17861600	3.81037e-23	-39.2251		Ca7	48285551	48285650	2.9013e-07	-29.8197		Ca3	10788351	10788450	4.58731e-06	-19.4325
Ca3	18530701	18530800	3.98008e-06	-30.3852		Ca8	1971501	1971600	1.4642e-16	-43.7438		Ca3	11294251	11294350	1.83699e-05	-16.2198
Ca3	18539001	18539100	3.33607e-20	-46.6284		Ca8	2190501	2190600	9.27644e-15	-31.4423		Ca3	11324551	11324650	4.01634e-12	-16.7176
Ca3	18922351	18922450	5.03737e-13	-27.5564		Ca8	2709151	2709350	7.11964e-42	-47.5316		Ca3	11672751	11672900	2.64844e-07	-20.3488
Ca3	19106851	19106950	5.07033e-17	-25.1337		Ca8	5521851	5522000	7.10287e-13	-33.6865		Ca3	11699001	11699100	4.82732e-07	-15.027
Ca3	19177301	19177400	6.53742e-44	-40.1508		Ca8	5879901	5880000	1.57407e-15	-35.361		Ca3	12107301	12107400	4.73337e-06	-15.8473
Ca3	19351351	19351450	4.87947e-26	-43.3381		Ca8	6885651	6885800	5.77866e-11	-31.7197		Ca3	12158501	12158600	2.3314e-05	-15.9494
Ca3	19450301	19450400	2.75431e-28	-49.7143		Ca8	6886101	6886300	5.06303e-27	-59.4738		Ca3	12431201	12431300	2.35608e-09	-17.767
Ca3	19847751	19847850	9.04357e-07	-31.8025		Ca8	6901851	6902000	8.70128e-08	-26.9302		Ca3	12818501	12818600	5.4515e-06	-20.248
Ca3	19905801	19905900	7.29073e-10	-29.3745		Ca8	8404901	8405000	4.94224e-07	-27.4545		Ca3	13124151	13124250	1.74738e-06	-17.2822
Ca3	19942001	19942100	1.57423e-33	-65.4737		Ca8	10162051	10162150	6.21193e-07	-32.6829		Ca3	14040601	14040700	4.57026e-07	-20.7505
Ca3	20322701	20322800	3.49087e-08	-25.4881		Ca8	10361301	10361450	8.00283e-31	-45.2484		Ca3	14068751	14068850	1.59384e-07	-23.0952
Ca3	20387251	20387350	3.46659e-16	-27.5282		Ca8	10381701	10381850	1.28593e-78	-47.291		Ca3	14122101	14122200	1.42491e-05	-20.1834
Ca3	20464301	20464400	1.73877e-10	-27.3847		Ca8	10911601	10911700	7.43753e-06	-26.4864		Ca3	14497501	14497600	1.07011e-07	-15.1838
Ca3	20505751	20505850	2.65533e-11	-26.5582		Ca8	14440101	14440200	1.3526e-09	-27.0669		Ca3	15248201	15248300	4.55753e-07	-17.0932
Ca3	20507201	20507300	1.02647e-07	-28.6808		Ca8	15793501	15793650	2.0737e-34	-60.1469		Ca3	15545851	15545950	1.8202e-05	-18.8993
Ca3	20534251	20534350	9.86223e-70	-83.8345		Ca8	16113801	16113900	2.95579e-08	-32.7233		Ca3	15668851	15668950	1.51693e-07	-17.1864
Ca3	20706901	20707000	1.69336e-11	-39.3208								Ca3	15772051	15772150	3.11289e-05	-20.7518
Ca3	21273301	21273400	1.20197e-08	-31.0243								Ca3	16654451	16654550	3.07082e-05	-16.233
Ca3	21424851	21425000	1.39831e-20	-38.9744								Ca3	16910001	16910100	2.43679e-06	-18.6167
Ca3	21646751	21646950	1.81907e-69	-47.7614								Ca3	16996201	16996300	3.5699e-06	-15.0862
Ca3	21670951	21671100	1.00103e-25	-35.6888								Ca3	17531801	17531950	9.26734e-08	-25.9983
Ca3	22098151	22098250	4.25261e-08	-28.2189								Ca3	17572051	17572150	1.97683e-11	-20.6938
Ca3	22434451	22434550	1.63594e-15	-26.2012								Ca3	17646751	17646850	1.14691e-12	-27.6209
Ca3	22506251	22506350	3.97306e-07	-27.191								Ca3	17792601	17792700	3.39693e-06	-16.5757
Ca3	22672201	22672350	4.68971e-15	-36.6129								Ca3	17940351	17940450	9.11797e-08	-28.3035
Ca3	22739851	22739950	2.43904e-11	-28.7264								Ca3	17967801	17967900	2.33366e-05	-21.0458
Ca3	22865651	22865750	2.34393e-18	-25.4145								Ca3	17982201	17982300	4.06492e-08	-18.3309
Ca3	22866701	22866800	2.18182e-24	-40.2392								Ca3	17998251	17998350	7.47744e-06	-20.71
Ca3	23210851	23210950	1.01801e-09	-30.1532								Ca3	18149151	18149250	2.68304e-06	-17.3077
Ca3	23693901	23694000	3.38888e-11	-28.7993								Ca3	18395501	18395650	1.88384e-08	-19.5543
Ca3	23997051	23997150	2.60506e-16	-39.8015								Ca3	18534401	18534500	3.60257e-09	-26.9426
Ca3	24082901	24083000	2.03737e-15	-38.2498								Ca3	18616051	18616200	3.59582e-11	-23.5573
Ca3	24132951	24133100	9.40074e-31	-76.654								Ca3	18724701	18724800	1.74413e-05	-20.3617
Ca3	24465901	24466050	1.14491e-121	-69.6415								Ca3	18852051	18852150	2.57038e-19	-19.32
Ca3	24506201	24506300	1.69722e-31	-51.6949								Ca3	19068551	19068650	4.84263e-07	-18.4754
Ca3	24531751	24531850	1.56113e-37	-35.3894								Ca3	19576701	19576800	4.66075e-06	-18.589
Ca3	24661751	24661900	2.0189e-24	-38.0287								Ca3	19580451	19580550	1.8647e-06	-16.8539
Ca3	24694151	24694250	3.94112e-23	-46.4012								Ca3	19660651	19660750	1.21735e-06	-17.6403
Ca3	24941451	24941550	8.58043e-07	-26.4612								Ca3	19684001	19684100	3.06752e-05	-17.708
Ca3	25266351	25266450	8.41413e-12	-34.0014								Ca3	19699451	19699550	9.77308e-06	-24.5621
Ca3	26186451	26186600	6.58736e-22	-32.4725								Ca3	19758701	19758800	1.20813e-09	-18.0991
Ca3	26293951	26294050	2.37437e-12	-33.0345								Ca3	19813951	19814050	2.52875e-05	-15.4851
Ca3	26303551	26303650	6.08197e-16	-31.8033								Ca3	19861401	19861550	1.49947e-05	-22.3055
Ca3	26579451	26579550	7.91883e-09	-26.3734								Ca3	20012451	20012600	1.0591e-06	-18.1356
Ca3	26814251	26814400	6.90065e-18	-30.3356								Ca3	20038701	20038800	2.17487e-09	-19.4486
Ca3	26824301	26824450	2.17556e-18	-32.1945								Ca3	20053701	20053800	2.97975e-05	-19.6512
Ca3	26877751	26877900	1.48995e-20	-40.8808								Ca3	20126951	20127100	1.54245e-06	-21.4305
Ca3	26880451	26880550	9.92719e-07	-28.0668								Ca3	20475101	20475200	6.32446e-06	-18.2088
Ca3	27020251	27020450	1.67552e-10	-34.5374								Ca3	20535801	20535900	1.41473e-06	-15.7372
Ca3	27024201	27024300	8.18387e-24	-39								Ca3	20757801	20757900	3.90884e-06	-26.0138
Ca3	27075151	27075250	8.49029e-09	-25.4911								Ca3	20939401	20939500	2.40766e-06	-18.9072
Ca3	27331551	27331700	4.87115e-36	-69.5222								Ca3	20939551	20939700	1.52204e-07	-20.151
Ca3	27612101	27612200	9.29143e-14	-27.1186								Ca3	20943951	20944050	3.25618e-05	-27.4987
Ca3	27719601	27719700	1.84679e-11	-26.8119								Ca3	20979451	20979550	1.00141e-06	-15.0989
Ca3	27759701	27759850	5.85409e-16	-30								Ca3	21283451	21283550	2.80938e-06	-23.7386
Ca3	27877251	27877350	6.97402e-12	-26.8358								Ca3	21481201	21481300	5.55346e-07	-27.2093
Ca3	27923101	27923250	3.46918e-16	-32.8894								Ca3	21961551	21961650	1.11889e-05	-23.2281
Ca3	28322851	28323000	1.51268e-17	-30.4062								Ca3	22113701	22113800	6.23906e-06	-16.7629
Ca3	28403501	28403600	8.29682e-20	-35.6104								Ca3	22220501	22220600	1.76215e-06	-19.7007
Ca3	28649051	28649200	6.06022e-36	-35.6859								Ca3	22247701	22247850	9.57613e-08	-22.6035
Ca3	28706301	28706400	2.47902e-16	-31.9993								Ca3	22285701	22285850	4.1119e-11	-36.329
Ca3	29132151	29132300	4.7156e-32	-54.3404								Ca3	22371201	22371350	2.57474e-11	-18.4599
Ca3	29356201	29356300	1.90933e-16	-35.4513								Ca3	22470951	22471050	1.92599e-07	-16.4347
Ca3	29627901	29628050	1.12711e-13	-38.4315								Ca3	22798951	22799050	2.90903e-07	-15.7287
Ca3	29629751	29629850	1.63577e-13	-48.6753								Ca3	22841451	22841550	6.15322e-06	-17.5959
Ca3	29902551	29902700	7.92142e-10	-35.9839								Ca3	23498901	23499050	1.50325e-14	-32.3427
Ca3	29909401	29909500	3.61811e-11	-33.4286								Ca3	23816401	23816500	2.94858e-06	-15.562
Ca3	30321501	30321650	2.51372e-20	-29.6051								Ca3	23842151	23842300	2.81663e-06	-19.2251
Ca3	30673501	30673600	3.74626e-07	-26.4399								Ca3	24319301	24319400	1.33899e-05	-23.4122
Ca3	30679301	30679400	4.43095e-10	-25.7608								Ca3	24543701	24543850	2.98359e-09	-18.3296
Ca3	30789451	30789550	1.26262e-12	-26.2617								Ca3	24803651	24803750	2.73893e-09	-16.6623
Ca3	30796151	30796250	9.33871e-13	-25.9566								Ca3	25115151	25115250	1.25888e-23	-33.0097
Ca3	30796351	30796450	1.1681e-13	-25.2061								Ca3	25416001	25416100	2.08116e-06	-18.3058
Ca3	31313101	31313200	1.52241e-23	-32.5843								Ca3	25417701	25417800	1.49416e-05	-16.4928
Ca3	31630951	31631050	3.67241e-06	-31.8506								Ca3	25465501	25465600	1.47104e-05	-15.4927
Ca3	31829651	31829750	1.58489e-24	-32.5652								Ca3	25467951	25468050	6.10091e-06	-21.4295
Ca3	31830501	31830650	2.09016e-25	-37.8919								Ca3	25653751	25653900	2.40757e-09	-19.6909
Ca3	31931951	31932050	4.64254e-44	-80.7076								Ca3	25814351	25814450	2.18913e-05	-17.818
Ca3	32576351	32576500	5.39464e-19	-35.0979								Ca3	26032351	26032450	1.28633e-08	-18.3099
Ca3	32576551	32576700	1.53742e-13	-29.7134								Ca3	26580701	26580850	1.8139e-08	-18.7977
Ca3	32576751	32576850	5.92822e-19	-38.7688								Ca3	26772601	26772700	2.61515e-05	-19.7504
Ca3	32580651	32580850	5.89459e-20	-45.8435								Ca3	27120051	27120150	1.04743e-09	-23.0038
Ca3	32580901	32581000	5.00761e-29	-47.7778								Ca3	27331551	27331700	1.0976e-17	-21.7914
Ca3	32620701	32620800	2.10144e-07	-26.468								Ca3	27644351	27644500	8.49569e-06	-17.2862
Ca3	32800851	32800950	2.06588e-15	-44.0345								Ca3	27820701	27820800	3.5501e-08	-18.8129
Ca3	32826851	32827000	8.95632e-26	-27.9987								Ca3	28102351	28102450	5.89943e-10	-19.7172
Ca3	32845051	32845200	7.77159e-43	-47.2062								Ca3	28793301	28793450	1.06329e-05	-18.7601
Ca3	33129001	33129150	2.88603e-22	-39.5673								Ca3	29052901	29053000	1.49231e-07	-17.3566
Ca3	33141701	33141800	3.41761e-05	-26.7086								Ca3	29208351	29208500	3.70183e-06	-20.8111
Ca3	33627451	33627600	4.20678e-07	-26.6381								Ca3	29343601	29343750	1.48178e-07	-21.789
Ca3	33909001	33909100	3.51321e-26	-45.2084								Ca3	29596551	29596650	2.83873e-05	-20.1242
Ca3	34248451	34248600	4.30689e-19	-33.8601								Ca3	30844851	30844950	2.90636e-08	-27.201
Ca3	34312151	34312300	1.59647e-08	-27.0724								Ca3	30851301	30851400	1.86763e-09	-23.3312
Ca3	34338501	34338600	2.48333e-11	-32.0454								Ca3	30911151	30911250	3.07184e-06	-28.3321
Ca3	34911601	34911700	1.03167e-08	-28.2204								Ca3	31066801	31066950	1.99372e-05	-21.018
Ca3	35023501	35023600	1.84568e-06	-27.6906								Ca3	31070451	31070550	5.49374e-09	-18.7193
Ca3	35260001	35260100	6.30796e-49	-25.3818								Ca3	31209851	31209950	3.29387e-06	-17.8056
Ca3	35543051	35543250	2.56834e-07	-54.0259								Ca3	31469901	31470050	3.78119e-06	-18.5625
Ca3	36003351	36003450	1.15501e-05	-26.1212								Ca3	31654051	31654150	3.36335e-07	-19.1262
Ca3	36319601	36319750	1.04349e-34	-30.6205								Ca3	32015151	32015250	1.54779e-05	-21.2335
Ca3	36610151	36610250	3.46419e-12	-25.5447								Ca3	32243251	32243450	1.03455e-05	-20.3764
Ca3	36649101	36649200	1.28727e-08	-25.8557								Ca3	32250051	32250150	1.61213e-05	-22.3856
Ca3	36715201	36715400	9.90626e-21	-39.9377								Ca3	32330251	32330350	1.99285e-05	-16.8632
Ca3	36721601	36721700	1.27962e-17	-28.3302								Ca3	32696301	32696400	2.75382e-05	-17.1615
Ca3	37161401	37161500	8.85568e-12	-28.7993								Ca3	32942901	32943000	8.67388e-07	-24.7597
Ca3	37180101	37180200	7.87787e-09	-36.1928								Ca3	33345051	33345150	1.18956e-06	-16.3713
Ca3	37497051	37497150	1.39933e-07	-31.2397								Ca3	33363451	33363550	2.72311e-05	-23.3864
Ca3	37598401	37598500	1.06779e-19	-36.7101								Ca3	33695301	33695400	9.8816e-07	-30.0216
Ca3	37636151	37636250	3.31365e-43	-59.2245								Ca3	33747401	33747500	2.54386e-06	-15.3799
Ca3	37822801	37822900	2.81496e-05	-25.3115								Ca3	33858701	33858800	4.86969e-06	-16.1588
Ca3	37911801	37912000	4.54273e-34	-52.6321								Ca3	33957701	33957800	2.23578e-07	-31.2431
Ca3	38019301	38019400	8.64554e-13	-26.8922								Ca3	34494801	34494900	9.16844e-07	-19.9475
Ca3	38156351	38156450	1.93032e-06	-25.7995								Ca3	34810651	34810750	3.54401e-06	-15.5093
Ca3	38425251	38425350	6.17615e-16	-37.7966								Ca3	35047751	35047850	1.28944e-06	-23.8647
Ca3	38425901	38426050	1.32414e-46	-43.0392								Ca3	35530351	35530450	6.12445e-09	-22.574
Ca3	38598501	38598650	1.80175e-19	-29.851								Ca3	35688251	35688400	3.88081e-07	-25.7784
Ca3	39011951	39012050	6.92311e-18	-33.5957								Ca3	35713551	35713650	1.91539e-07	-16.777
Ca3	39012101	39012200	6.51258e-09	-25.2109								Ca3	36476401	36476500	3.63385e-08	-21.0544
Ca3	39235451	39235600	8.48134e-11	-36.2566								Ca3	36555101	36555200	1.94019e-05	-16.7365
Ca3	39312651	39312750	3.82648e-06	-25.5556								Ca3	37007551	37007700	7.29957e-10	-16.392
Ca3	39522851	39522950	1.30855e-19	-44.0502								Ca3	37020001	37020100	2.27899e-05	-17.2161
Ca3	39647501	39647600	4.33602e-05	-26.8909								Ca3	37433251	37433350	2.42688e-05	-16.8696
Ca3	39943051	39943150	5.1182e-12	-34.5969								Ca3	37958301	37958400	4.63205e-06	-15.0052
Ca4	150851	151000	3.13089e-49	30.2769								Ca3	37972351	37972500	2.55124e-14	-16.1301
Ca4	180801	180900	1.15895e-12	38.407								Ca3	38632301	38632400	1.07596e-05	-17.7249
Ca4	344051	344200	1.99578e-10	25.61								Ca3	38799801	38799900	1.04961e-08	-25.0728
Ca4	376551	376650	2.06366e-06	26.0623								Ca3	39002451	39002550	2.68685e-06	-15.7761
Ca4	682351	682450	4.05514e-11	33.2101								Ca3	39297451	39297550	5.95606e-07	-16.9211
Ca4	849201	849350	1.63295e-25	42.2343								Ca3	39754951	39755050	5.133e-06	-20.8874
Ca4	909001	909100	3.98235e-09	30.6399								Ca4	389751	389850	8.02917e-08	19.3413
Ca4	920651	920750	7.26522e-13	31.4267								Ca4	497601	497750	4.34536e-09	20.6579
Ca4	1305501	1305600	8.89215e-15	33.7608								Ca4	728801	728900	9.19304e-07	19.6609
Ca4	1341101	1341200	4.67913e-12	26.5709								Ca4	777301	777450	1.15343e-05	16.8355
Ca4	1354751	1354900	1.55911e-12	27.5325								Ca4	940751	940850	2.526e-05	19.9659
Ca4	1553651	1553800	5.66066e-15	43.9965								Ca4	964751	964850	1.01464e-05	18.3639
Ca4	1700851	1700950	2.36067e-16	26.722								Ca4	1165951	1166050	8.43259e-07	22.2332
Ca4	1844201	1844300	3.89504e-12	28.4302								Ca4	1466051	1466150	1.31974e-08	20.4849
Ca4	1869201	1869300	1.47373e-19	45.416								Ca4	1552201	1552300	2.07943e-06	24.6834
Ca4	2024401	2024500	1.5796e-33	35.8393								Ca4	1729451	1729650	7.52746e-11	22.9583
Ca4	2072001	2072100	1.12759e-26	57.8656								Ca4	1730101	1730200	1.16577e-05	24.0565
Ca4	2132901	2133000	2.37189e-10	31.4286								Ca4	1965901	1966000	1.55328e-06	24.3207
Ca4	2304151	2304300	1.36815e-05	34.1531								Ca4	2027951	2028050	2.64763e-05	21.1791
Ca4	2499651	2499750	9.51647e-18	26.8255								Ca4	2098151	2098250	3.00946e-05	17.5746
Ca4	2886901	2887000	1.30914e-12	26.6234								Ca4	2176651	2176750	3.75073e-06	18.6888
Ca4	3321401	3321550	1.2116e-15	41.4019								Ca4	2290651	2290750	1.03293e-11	20.6287
Ca4	3887451	3887550	1.74088e-18	40.7356								Ca4	2354601	2354700	1.71527e-06	24.7491
Ca4	4238251	4238400	6.23291e-23	36.01								Ca4	2526051	2526200	9.61635e-08	19.5663
Ca4	4578751	4578850	5.22996e-15	26.6222								Ca4	2605101	2605200	3.65881e-07	22.9984
Ca4	4617751	4617850	2.83498e-10	26.087								Ca4	2720801	2720900	2.74214e-11	22.4184
Ca4	4688701	4688800	3.21304e-06	27.2321								Ca4	2815401	2815550	1.90869e-07	19.2449
Ca4	4966451	4966600	8.85083e-106	92.8367								Ca4	2896751	2896850	1.82138e-06	16.7053
Ca4	4966551	4966700	2.3884e-300	92.6707								Ca4	2927651	2927800	5.12425e-09	19.4336
Ca4	4966651	4966800	9.4518e-233	73.3876								Ca4	3079451	3079600	1.63535e-07	18.3026
Ca4	5627101	5627200	4.97798e-24	37.5								Ca4	3090901	3091000	7.01885e-06	20.9632
Ca4	5976501	5976650	5.06984e-12	30.2539								Ca4	3125101	3125200	1.89443e-07	15.1792
Ca4	6133801	6133900	3.35411e-65	91.8482								Ca4	3177351	3177450	2.1137e-05	15.8165
Ca4	6306801	6306900	3.65386e-20	26.0774								Ca4	3375901	3376000	3.47007e-06	27.3948
Ca4	6510401	6510500	2.15685e-09	31.9139								Ca4	3450101	3450250	7.56499e-06	20.1009
Ca4	6617451	6617550	3.47445e-09	32.0004								Ca4	3450801	3450900	2.21476e-06	29.9014
Ca4	6683451	6683550	8.79091e-10	27.1681								Ca4	3581951	3582050	1.61711e-06	15.9257
Ca4	6851851	6852000	1.7534e-18	37.6417								Ca4	3732601	3732700	5.38675e-06	15.3594
Ca4	6924251	6924350	7.83701e-37	66.7555								Ca4	3732851	3732950	6.9902e-06	17.9066
Ca4	7210001	7210150	8.34444e-44	67.556								Ca4	3733051	3733150	1.88836e-05	21.4937
Ca4	7499801	7499950	4.11988e-27	54.8837								Ca4	4601701	4601800	3.08078e-12	32.5242
Ca4	7595301	7595450	2.84671e-19	33.3757								Ca4	4690101	4690200	6.14117e-06	22.717
Ca4	7766751	7766850	1.43167e-15	27.5851								Ca4	4966401	4966550	2.17681e-16	21.9063
Ca4	7917801	7917900	9.73284e-07	25.8093								Ca4	4982301	4982400	1.63387e-05	25.427
Ca4	8418051	8418150	1.31149e-06	27.3845								Ca4	5089801	5089900	5.55507e-08	15.1467
Ca4	8660051	8660200	1.01833e-36	35.0509								Ca4	5128901	5129000	4.37923e-06	15.4504
Ca4	9113951	9114050	2.28096e-15	38.7097								Ca4	5183001	5183100	1.72901e-06	18.5836
Ca4	9132001	9132150	1.28749e-19	26.4174								Ca4	5432751	5432850	1.13482e-05	20.708
Ca4	9145701	9145800	8.38835e-08	29.5635								Ca4	5517601	5517700	8.32715e-07	26.0695
Ca4	9161851	9161950	1.69014e-08	38.4204								Ca4	5518001	5518100	6.10685e-08	15.825
Ca4	9332051	9332200	3.08465e-12	39.4099								Ca4	5519101	5519250	8.15886e-14	19.052
Ca4	9837751	9837850	8.73162e-09	26.7105								Ca4	5952601	5952700	1.6073e-05	22.2477
Ca4	9975051	9975150	9.53937e-33	55.9998								Ca4	6174601	6174700	2.03255e-05	16.5596
Ca4	10008251	10008350	1.91355e-18	26.7734								Ca4	6244901	6245000	2.96674e-07	28.1989
Ca4	10188251	10188350	6.08381e-06	26.1776								Ca4	6291451	6291550	2.16487e-06	29.8317
Ca4	10408901	10409050	1.92215e-09	27.7277								Ca4	6470351	6470450	2.68011e-07	20.4121
Ca4	10431001	10431100	6.06538e-10	28.0829								Ca4	6484801	6484900	5.75082e-06	18.5426
Ca4	10447401	10447500	3.97972e-07	28.6903								Ca4	6551001	6551150	1.11401e-05	16.9526
Ca4	10526301	10526400	6.24249e-15	36.4298								Ca4	6708701	6708850	2.56924e-05	22.0061
Ca4	10595201	10595300	9.24402e-09	26.5667								Ca4	6904551	6904650	2.87076e-05	15.1679
Ca4	11212101	11212200	4.81585e-11	28.758								Ca4	6907551	6907650	2.77681e-05	18.6381
Ca4	12029551	12029700	1.06053e-30	53.2691								Ca4	7024351	7024450	1.09361e-05	15.2474
Ca4	12166701	12166800	2.30577e-15	48.7597								Ca4	7479601	7479700	6.02697e-06	25.2947
Ca4	12302451	12302550	1.4832e-13	29.1429								Ca4	7549651	7549750	9.85349e-07	17.2159
Ca4	12783051	12783150	7.57549e-13	35.7455								Ca4	7571651	7571800	1.33769e-07	19.0236
Ca4	12859201	12859350	3.75965e-16	27.04								Ca4	7707201	7707350	2.18798e-11	24.6806
Ca4	12955301	12955400	1.67336e-21	28.0163								Ca4	7949301	7949400	2.51187e-05	19.2931
Ca4	13062301	13062400	3.67053e-06	28.6934								Ca4	8991251	8991350	1.53833e-08	22.0174
Ca4	13240151	13240300	4.00151e-13	27.4715								Ca4	9282751	9282900	1.50105e-09	23.3914
Ca4	13252851	13252950	2.62443e-13	34.7364								Ca4	9368751	9368850	8.54104e-06	21.7711
Ca4	13548251	13548350	1.79779e-24	26.3102								Ca4	9506801	9506900	1.30756e-10	34.4821
Ca4	13915101	13915200	4.61371e-11	27.4224								Ca4	9522151	9522250	3.12685e-06	18.1606
Ca4	14121801	14121950	2.70931e-28	36.1613								Ca4	10478151	10478250	9.15722e-06	17.3326
Ca4	14647701	14647850	4.58908e-16	29.3525								Ca4	10516851	10516950	2.51813e-05	17.4537
Ca4	15026301	15026450	2.34697e-10	26.1957								Ca4	10624251	10624350	6.63044e-06	15.9259
Ca4	15878001	15878100	3.36233e-19	29.7152								Ca4	10765501	10765600	5.88307e-07	25.5588
Ca4	16144601	16144700	4.4321e-31	67.2505								Ca4	10800451	10800600	1.20829e-05	18.0418
Ca4	16183251	16183400	2.20379e-06	27.1699								Ca4	10878351	10878450	1.98767e-06	18.8805
Ca4	16361451	16361550	2.79766e-26	44.8411								Ca4	11404551	11404650	1.62295e-06	15.056
Ca4	16361801	16361900	3.93684e-10	26.1657								Ca4	11595201	11595300	3.15872e-06	21.0069
Ca4	16508651	16508750	1.98982e-08	25.6133								Ca4	12244551	12244650	1.34166e-06	22.5703
Ca4	16602401	16602550	7.60286e-24	32.4743								Ca4	12635951	12636050	9.03654e-06	16.5904
Ca4	17280801	17280900	2.67942e-09	28.2937								Ca4	12725001	12725100	3.42296e-12	16.1738
Ca4	17490301	17490400	2.86394e-18	28.3688								Ca4	12757001	12757150	1.41617e-06	18.086
Ca4	17695701	17695800	1.70111e-06	28.9184								Ca4	12876351	12876450	1.9881e-05	18.2471
Ca4	17704401	17704500	8.41045e-16	29.0751								Ca4	13000351	13000450	3.46193e-06	17.6792
Ca4	17881051	17881200	1.15982e-18	41.4756								Ca4	13274551	13274650	5.68578e-07	15.3041
Ca4	17945651	17945750	2.41727e-16	39.1934								Ca4	13315851	13315950	1.13792e-05	17.2181
Ca4	17981351	17981450	5.99523e-13	27.3523								Ca4	13908151	13908250	1.24625e-07	19.0074
Ca4	18219751	18219850	7.8166e-08	31.3775								Ca4	14064251	14064450	9.8969e-18	30.4019
Ca4	18467301	18467450	3.53757e-28	30.4821								Ca4	14085751	14085850	9.75794e-07	19.5882
Ca4	18721801	18721900	9.28889e-10	26.9851								Ca4	14143101	14143200	1.02363e-05	18.2598
Ca4	18778751	18778900	1.53424e-10	28.4291								Ca4	14170551	14170650	1.23488e-08	24.3522
Ca4	19261901	19262000	3.77052e-13	26.9737								Ca4	14438601	14438700	1.4833e-06	28.0678
Ca4	19713351	19713500	8.30547e-71	60.5586								Ca4	14541251	14541350	4.56557e-06	17.4385
Ca4	19850851	19850950	1.18947e-95	92.563								Ca4	14750751	14750850	2.26566e-06	17.0437
Ca4	20227751	20227900	6.51298e-27	53.475								Ca4	14751501	14751600	2.11854e-05	18.6949
Ca4	20227851	20228000	1.18723e-41	48.4606								Ca4	14808501	14808650	9.3827e-06	18.9357
Ca4	20447551	20447650	5.26099e-14	25.8462								Ca4	14844751	14844850	3.44834e-07	17.73
Ca4	20674551	20674650	1.34303e-28	32.8125								Ca4	15058651	15058750	1.04669e-05	19.561
Ca4	21762051	21762200	2.17414e-09	36.62								Ca4	15207201	15207350	3.32959e-06	19.2887
Ca4	21881401	21881500	1.56902e-19	41.2121								Ca4	15220651	15220800	3.40889e-07	29.2929
Ca4	21939601	21939750	1.277e-31	62.0194								Ca4	15734351	15734450	2.52734e-06	16.6724
Ca4	22972301	22972400	8.27669e-19	29.0345								Ca4	15769851	15770000	3.45246e-08	32.0373
Ca4	23807151	23807250	0.00027173	26.7447								Ca4	15793851	15793950	9.31154e-08	23.1201
Ca4	24603351	24603450	6.0046e-12	36.2456								Ca4	16220151	16220250	2.51087e-05	15.3034
Ca4	24999651	24999750	3.05862e-05	25.1724								Ca4	16221651	16221750	3.79512e-06	16.2632
Ca4	26170251	26170350	1.31902e-15	27.6026								Ca4	16335151	16335250	3.31516e-06	15.0669
Ca4	26415151	26415250	1.58147e-16	27.2357								Ca4	16560501	16560600	1.37933e-08	17.2973
Ca4	28081301	28081400	1.41588e-07	27.5176								Ca4	16792501	16792600	6.15747e-06	20.8586
Ca4	28873751	28873850	6.72555e-11	32.3451								Ca4	17322351	17322450	5.93184e-09	15.8393
Ca4	30539901	30540000	1.15928e-13	25.4032								Ca4	17470451	17470600	9.32212e-06	20.237
Ca4	31129951	31130050	5.52189e-09	28.3184								Ca4	17959901	17960050	1.02384e-07	16.8535
Ca4	32246351	32246450	2.70216e-11	26.4049								Ca4	18124451	18124550	9.34116e-06	17.6101
Ca4	32582901	32583000	1.84101e-10	27.8968								Ca4	18129151	18129250	4.73909e-11	15.9679
Ca4	33460051	33460200	2.38791e-13	28.9194								Ca4	18203951	18204050	1.49003e-06	16.5803
Ca4	34025101	34025200	3.27815e-10	28.2853								Ca4	18274001	18274100	3.05879e-08	16.7983
Ca4	34025201	34025300	2.89807e-14	26.5756								Ca4	18669601	18669700	3.36777e-11	24.702
Ca4	35097301	35097450	8.85133e-19	32.5982								Ca4	18952401	18952500	8.2392e-08	17.3873
Ca4	36570951	36571100	8.93483e-10	35.4162								Ca4	18990101	18990200	2.09799e-08	34.5087
Ca4	37095701	37095850	1.02304e-07	35.101								Ca4	19003901	19004000	5.85367e-10	17.5327
Ca4	37167451	37167550	3.13468e-16	25.4086								Ca4	19031701	19031800	7.97105e-06	16.5176
Ca4	37260501	37260600	9.32336e-07	29.798								Ca4	19104251	19104350	1.58564e-05	21.6411
Ca4	37316701	37316800	7.75752e-17	26.9669								Ca4	19302501	19302600	5.36429e-06	19.0712
Ca4	37643651	37643800	1.5307e-24	42.6564								Ca4	19346151	19346250	6.15998e-06	18.4507
Ca4	37691801	37691900	1.17827e-26	52.1296								Ca4	19565051	19565150	1.88509e-05	16.0826
Ca4	39267951	39268050	1.53341e-06	30.5068								Ca4	20227901	20228050	1.40379e-13	22.3378
Ca4	39589951	39590150	8.64671e-16	31.4111								Ca4	20573251	20573350	3.05608e-07	16.488
Ca4	39788851	39788950	1.84541e-09	26.4286								Ca4	20990401	20990500	4.22208e-08	16.1355
Ca4	40511201	40511350	4.69185e-13	28.379								Ca4	21382001	21382100	1.73456e-06	15.519
Ca4	40919901	40920000	8.68375e-10	38.2867								Ca4	21700901	21701000	3.28333e-08	25.2983
Ca4	41159951	41160050	1.7272e-49	78.3377								Ca4	21704751	21704900	2.69644e-07	28.593
Ca4	41207601	41207700	3.1716e-14	31.7959								Ca4	21831151	21831250	1.83283e-15	19.2547
Ca4	41373601	41373750	1.07812e-17	32.8536								Ca4	21915401	21915500	1.77013e-05	16.54
Ca4	41698451	41698550	5.2681e-12	29.5424								Ca4	22162251	22162350	8.51579e-07	19.5327
Ca4	41934351	41934450	2.86754e-12	32.3342								Ca4	22210451	22210550	1.508e-06	24.632
Ca4	42144401	42144550	2.65841e-26	40.0538								Ca4	22235651	22235800	4.52722e-09	22.4096
Ca4	42197551	42197650	9.34876e-13	38.3944								Ca4	22235851	22235950	2.14911e-10	16.8873
Ca4	43759751	43759850	4.73232e-11	30.3475								Ca4	22323901	22324000	2.00095e-06	26.7298
Ca4	43943351	43943450	8.09152e-31	74.8734								Ca4	22915301	22915400	3.93427e-08	21.9428
Ca4	44075651	44075800	1.0706e-07	30.5516								Ca4	23222001	23222100	2.04922e-08	20.5942
Ca4	44247001	44247100	8.95779e-13	29.903								Ca4	23480251	23480400	3.89437e-06	20.0991
Ca4	44388701	44388800	1.5504e-08	25.625								Ca4	23968251	23968350	7.49424e-07	20.6975
Ca4	44397651	44397750	3.63675e-17	32.5444								Ca4	24008301	24008400	1.15451e-06	17.5923
Ca4	44783601	44783750	4.81943e-11	31.9832								Ca4	24024801	24024900	2.66387e-07	18.3461
Ca4	45231301	45231400	2.34777e-20	48.125								Ca4	24048751	24048850	3.83698e-06	17.2002
Ca4	46717001	46717100	1.55259e-14	32.6358								Ca4	24341501	24341600	2.17544e-05	15.0605
Ca4	47207901	47208000	2.78002e-15	27.4398								Ca4	24739501	24739600	2.09663e-05	17.5656
Ca4	47487051	47487150	8.20529e-13	30.1452								Ca4	24888651	24888750	2.08042e-05	20.8043
Ca4	47664951	47665050	9.99052e-08	27.2562								Ca4	26632501	26632600	5.57659e-09	28.8462
Ca4	48132851	48132950	8.67517e-10	26.4049								Ca4	26761951	26762050	1.33576e-06	19.7302
Ca4	48293651	48293750	1.35333e-17	28.975								Ca4	26762651	26762750	3.42529e-09	23.6361
Ca4	48293751	48293850	3.09988e-17	28.2828								Ca4	27003651	27003750	4.37606e-09	27.4396
Ca4	48707151	48707250	1.28732e-15	37.1572								Ca4	27160951	27161100	3.92167e-14	22.7531
Ca4	25401	25500	1.98654e-66	-62.8672								Ca4	27967301	27967400	4.28418e-08	18.6188
Ca4	148401	148550	1.26285e-26	-45.6677								Ca4	28095201	28095300	2.00638e-05	15.6458
Ca4	281351	281500	9.55041e-26	-35.3698								Ca4	28345751	28345900	9.86245e-11	23.1188
Ca4	353501	353600	4.55723e-14	-33.0122								Ca4	28596551	28596650	7.04618e-07	23.6628
Ca4	432051	432200	3.84645e-85	-48.7351								Ca4	30782451	30782550	4.22727e-09	16.3378
Ca4	480251	480350	2.27925e-11	-36.8023								Ca4	31623601	31623700	1.28973e-05	17.686
Ca4	503351	503450	1.5181e-07	-25.3879								Ca4	32706051	32706150	9.0843e-07	19.2054
Ca4	654051	654150	2.05304e-13	-33.2095								Ca4	32715251	32715350	6.06257e-06	17.3982
Ca4	850501	850600	9.38876e-33	-36.7861								Ca4	32799351	32799500	1.50792e-11	22.3382
Ca4	895401	895500	6.59073e-10	-32.1554								Ca4	35042251	35042400	3.52476e-07	21.8941
Ca4	1049901	1050000	1.7816e-10	-31.9015								Ca4	36596051	36596150	3.30387e-05	21.862
Ca4	1399501	1399600	2.82494e-06	-27.0078								Ca4	37320201	37320300	2.22013e-06	20.4844
Ca4	1471001	1471150	4.85971e-11	-29.6344								Ca4	38119201	38119300	1.80218e-05	23.3083
Ca4	1701301	1701450	1.9492e-36	-33.2135								Ca4	38645901	38646000	9.72701e-08	17.2253
Ca4	1810701	1810850	9.98002e-27	-36.7177								Ca4	38950651	38950750	1.47141e-06	24.3039
Ca4	2318301	2318400	7.40124e-05	-25.8188								Ca4	39358851	39358950	5.99686e-08	18.4343
Ca4	2735601	2735750	9.67768e-08	-33.2049								Ca4	39708051	39708150	1.87755e-06	15.9121
Ca4	2855301	2855400	2.04531e-05	-27.375								Ca4	39778101	39778200	7.70206e-10	33.544
Ca4	2869601	2869700	3.43831e-15	-26.2069								Ca4	39778501	39778600	3.45691e-07	23.3567
Ca4	2894901	2895000	7.01335e-08	-37.2585								Ca4	40015851	40015950	1.57151e-08	23.5203
Ca4	2927301	2927400	1.33007e-26	-61.1536								Ca4	40017651	40017750	1.10866e-05	15.4184
Ca4	2997501	2997600	9.9675e-13	-34.2246								Ca4	40409051	40409150	7.02152e-06	17.7117
Ca4	3108551	3108650	4.39009e-12	-33.8837								Ca4	41112001	41112100	1.64096e-08	18.2483
Ca4	3214201	3214300	3.22712e-22	-25.9118								Ca4	41177001	41177100	1.78118e-12	15.3472
Ca4	3455651	3455750	2.7368e-15	-27.3665								Ca4	41223951	41224050	1.05898e-05	15.6196
Ca4	3643851	3644000	3.19136e-33	-64.5145								Ca4	41230351	41230500	9.04998e-07	22.0082
Ca4	3676101	3676200	2.08537e-06	-32.2536								Ca4	41284001	41284100	7.39805e-06	16.279
Ca4	3677901	3678050	3.90232e-13	-38.1064								Ca4	41524601	41524700	3.51161e-06	18.2131
Ca4	3730701	3730850	5.75227e-21	-28.9652								Ca4	41789601	41789700	2.92881e-05	16.9309
Ca4	3752601	3752700	1.52244e-07	-26.0462								Ca4	42412351	42412450	7.29966e-06	16.7196
Ca4	4452201	4452350	2.48758e-13	-29.526								Ca4	42687551	42687650	8.67969e-07	18.2048
Ca4	4454151	4454300	1.90033e-26	-29.6651								Ca4	42687851	42687950	1.78648e-06	17.6003
Ca4	4765651	4765750	2.15076e-08	-31.2633								Ca4	43299701	43299800	1.18373e-05	16.5338
Ca4	4818851	4818950	2.84412e-13	-25.4717								Ca4	43331451	43331550	6.25021e-07	23.4201
Ca4	4882851	4883000	1.32282e-20	-50.3922								Ca4	43775301	43775400	5.97464e-06	17.2556
Ca4	5031751	5031850	4.87948e-21	-43.047								Ca4	43845201	43845300	1.47008e-05	16.593
Ca4	5112801	5112950	1.45056e-42	-64.025								Ca4	43897501	43897650	1.52935e-12	26.757
Ca4	5138601	5138700	1.49885e-15	-34.686								Ca4	44029651	44029750	4.96356e-08	16.9837
Ca4	5195901	5196050	3.27335e-08	-35.409								Ca4	44124851	44124950	1.06868e-06	17.5534
Ca4	5237401	5237500	2.24498e-19	-26.3291								Ca4	44612351	44612500	4.41966e-07	19.6032
Ca4	5447151	5447250	1.55371e-11	-39.5534								Ca4	44621901	44622000	2.0494e-05	15.7195
Ca4	5637051	5637150	5.04616e-31	-72.3077								Ca4	45055101	45055200	2.20831e-06	25.8589
Ca4	6085651	6085750	6.02068e-14	-37.4472								Ca4	45115251	45115350	2.58287e-07	26.7705
Ca4	6238051	6238150	3.12129e-07	-26.6269								Ca4	45513651	45513800	2.86463e-08	19.4992
Ca4	6570851	6570950	2.31104e-10	-37.0402								Ca4	45599551	45599650	5.49362e-06	17.6152
Ca4	6852651	6852750	2.65326e-12	-34.6494								Ca4	45702851	45702950	6.44098e-06	18.4989
Ca4	7094151	7094300	4.57978e-08	-31.1505								Ca4	46251301	46251400	1.46222e-05	15.7349
Ca4	7142201	7142350	1.31052e-19	-30.2302								Ca4	46280551	46280650	1.90127e-10	31.319
Ca4	7497551	7497700	1.41956e-11	-26.2859								Ca4	46460601	46460700	1.55388e-05	16.8973
Ca4	7523751	7523850	1.95712e-11	-42.0681								Ca4	46504901	46505000	2.01542e-10	21.689
Ca4	7767851	7767950	1.49929e-09	-33.2836								Ca4	46591151	46591250	1.05103e-07	17.1489
Ca4	7830951	7831050	1.51225e-22	-40.5163								Ca4	46640701	46640800	7.03332e-07	18.5957
Ca4	8782501	8782600	9.01297e-30	-41.4341								Ca4	46640901	46641000	9.23393e-06	17.8477
Ca4	8782651	8782750	1.03208e-08	-25.158								Ca4	46712251	46712350	8.60446e-08	19.3966
Ca4	8934801	8934900	8.91988e-07	-29.778								Ca4	46751501	46751600	1.47933e-07	20.7587
Ca4	9320601	9320750	6.60921e-13	-46.1098								Ca4	47097051	47097150	1.6036e-06	17.9304
Ca4	10113101	10113200	1.41117e-05	-28.4584								Ca4	47133401	47133500	7.5607e-07	19.0245
Ca4	10117651	10117750	3.48988e-08	-25.652								Ca4	47213601	47213700	5.67788e-06	17.9583
Ca4	10282551	10282700	2.10598e-21	-56.5238								Ca4	47285401	47285500	1.4468e-05	17.796
Ca4	10503151	10503250	2.43202e-08	-30.1418								Ca4	47440401	47440500	1.15953e-05	27.892
Ca4	10553601	10553700	3.26396e-19	-38.3746								Ca4	47440501	47440600	6.86936e-06	22.8579
Ca4	10576651	10576800	1.51531e-26	-42.8291								Ca4	47441951	47442050	4.09062e-07	26.7313
Ca4	10685401	10685500	3.38308e-13	-31.6277								Ca4	47516001	47516100	2.64338e-06	22.2329
Ca4	10796301	10796400	3.09382e-13	-29.2169								Ca4	48132751	48132850	9.02239e-08	17.2624
Ca4	11067401	11067500	2.27256e-19	-34.7084								Ca4	48522901	48523050	6.89669e-07	17.0182
Ca4	11095201	11095350	5.60775e-11	-39.8936								Ca4	48670501	48670600	1.42385e-06	22.3277
Ca4	11193451	11193600	6.96152e-08	-34.3244								Ca4	48780251	48780350	5.65781e-06	17.2429
Ca4	11314001	11314100	1.74228e-22	-46.9593								Ca4	48790101	48790200	5.62235e-06	15.3901
Ca4	11804601	11804750	5.31459e-35	-42.7312								Ca4	468351	468450	4.60366e-06	-16.3781
Ca4	12169801	12169950	1.99546e-12	-26.6487								Ca4	533251	533400	2.94007e-05	-18.3237
Ca4	12318451	12318650	8.0187e-28	-40.6501								Ca4	740401	740500	1.95996e-06	-15.3516
Ca4	12435351	12435500	5.32656e-11	-37.0591								Ca4	776501	776600	7.01646e-06	-22.8411
Ca4	12706451	12706550	9.24233e-10	-27.7711								Ca4	1014651	1014750	9.73198e-06	-15.6385
Ca4	13000451	13000550	1.37238e-57	-87.8788								Ca4	1319751	1319850	1.64191e-06	-20.7553
Ca4	13258401	13258500	1.73071e-17	-45.9055								Ca4	1594601	1594700	2.02176e-06	-26.6667
Ca4	13547251	13547450	1.6399e-82	-60.5265								Ca4	1616901	1617000	8.38574e-06	-16.7943
Ca4	13552101	13552250	8.48662e-35	-35.8249								Ca4	1646001	1646100	9.49366e-07	-19.3791
Ca4	13761351	13761450	8.48683e-08	-35.2063								Ca4	1739601	1739700	1.51859e-07	-16.5127
Ca4	13766551	13766650	4.37881e-06	-28.5294								Ca4	1956151	1956250	8.15266e-09	-25.295
Ca4	13810951	13811100	2.49935e-19	-26.6072								Ca4	2225301	2225400	8.21678e-07	-17.8064
Ca4	14072001	14072100	1.24697e-08	-31.7629								Ca4	2839001	2839100	5.55686e-08	-36.2967
Ca4	14240901	14241050	1.63801e-18	-30.9582								Ca4	2851751	2851850	2.33333e-07	-22.1123
Ca4	14253351	14253550	2.42476e-07	-30.6387								Ca4	2866451	2866550	5.48894e-07	-16.9127
Ca4	14257501	14257600	5.84971e-16	-29.2623								Ca4	2997401	2997500	3.29673e-08	-19.6364
Ca4	14287251	14287350	4.11644e-10	-29.9279								Ca4	3082801	3082900	1.2454e-05	-19.5557
Ca4	14318701	14318800	2.43089e-10	-28.5754								Ca4	3435451	3435550	1.94075e-08	-16.6277
Ca4	14465451	14465550	8.76012e-07	-25.9524								Ca4	5072751	5072850	2.21528e-05	-18.1287
Ca4	14680951	14681050	6.61268e-08	-28.1411								Ca4	5084101	5084200	3.84895e-06	-17.1779
Ca4	14784201	14784300	8.03481e-09	-33.794								Ca4	5246101	5246200	3.16594e-05	-25.2231
Ca4	14896651	14896750	2.14403e-10	-27.2586								Ca4	5334351	5334450	1.35054e-08	-20.5969
Ca4	15025651	15025800	1.18714e-36	-37.3557								Ca4	5720251	5720350	6.24245e-06	-18.2923
Ca4	15258001	15258100	2.6972e-13	-27.6403								Ca4	5749601	5749700	4.90632e-07	-20.4142
Ca4	15442901	15443000	2.33715e-08	-29.1528								Ca4	5761851	5761950	5.86264e-06	-18.3393
Ca4	15546001	15546100	2.87517e-07	-27.2715								Ca4	5824551	5824650	6.523e-07	-29.7525
Ca4	15816251	15816400	3.10196e-23	-43.204								Ca4	5961001	5961100	2.13265e-07	-16.2515
Ca4	15816451	15816550	6.85364e-08	-27.6356								Ca4	6382951	6383100	5.24999e-07	-18.7365
Ca4	15863301	15863450	1.28407e-12	-40.4448								Ca4	6536651	6536750	1.37797e-05	-16.4339
Ca4	15915051	15915150	1.07106e-11	-34.9359								Ca4	6808851	6808950	4.57595e-06	-24.4042
Ca4	15969651	15969750	9.42146e-10	-32.8976								Ca4	6911751	6911850	5.35981e-07	-16.2169
Ca4	16046151	16046250	4.5465e-25	-62.0934								Ca4	6928801	6928900	1.37718e-11	-22.2
Ca4	16150101	16150200	1.13229e-12	-28.8913								Ca4	7330351	7330500	9.91416e-06	-22.896
Ca4	16712851	16713000	3.32448e-13	-32.6457								Ca4	7631951	7632050	2.57236e-06	-16.6057
Ca4	16849151	16849250	1.14982e-21	-56.1064								Ca4	7680501	7680650	3.52396e-21	-24.7042
Ca4	16877151	16877300	8.01741e-22	-44.2458								Ca4	7969301	7969400	2.6644e-08	-27.0133
Ca4	16975001	16975100	6.53959e-12	-43.7483								Ca4	8593901	8594000	6.77097e-06	-18.4142
Ca4	16996001	16996100	3.90542e-07	-26.0054								Ca4	8734051	8734150	1.08511e-08	-20.6897
Ca4	17034151	17034250	5.31124e-09	-25.0852								Ca4	9197701	9197850	5.75897e-07	-21.4289
Ca4	17219801	17219900	3.63258e-08	-29.4489								Ca4	9554251	9554400	5.82728e-08	-19.0627
Ca4	17277451	17277600	7.73515e-25	-43.9745								Ca4	9781251	9781350	2.45268e-07	-25.0658
Ca4	17399951	17400050	1.71563e-21	-26.3452								Ca4	10109801	10109950	7.20742e-07	-16.1908
Ca4	17690851	17690950	5.5266e-13	-35.1307								Ca4	10574151	10574250	8.07511e-09	-25.8411
Ca4	17784951	17785050	9.29145e-11	-28.361								Ca4	10726451	10726550	1.86746e-06	-29.0598
Ca4	17922501	17922600	7.31076e-37	-76.5432								Ca4	10796201	10796350	1.74792e-15	-19.0117
Ca4	17952051	17952150	7.45596e-11	-29.3699								Ca4	10963351	10963450	1.9768e-06	-18.9956
Ca4	18175001	18175100	1.11033e-26	-38.6469								Ca4	10966501	10966600	1.32498e-05	-23.1842
Ca4	18482001	18482150	3.38828e-27	-45.6438								Ca4	11844401	11844500	1.0445e-05	-22.5155
Ca4	18527901	18528000	1.68134e-39	-70.3909								Ca4	11939901	11940000	1.378e-05	-19.3125
Ca4	18528701	18528800	5.08043e-13	-25.2688								Ca4	12291801	12291900	1.63277e-08	-22.1863
Ca4	18957451	18957550	6.84979e-11	-26.5506								Ca4	12354101	12354200	8.97853e-08	-23.9116
Ca4	19127301	19127400	3.12714e-10	-35.4248								Ca4	12354201	12354300	9.78368e-06	-19.3015
Ca4	19156801	19156950	1.41574e-18	-44.3245								Ca4	13303801	13303900	3.58458e-06	-16.7866
Ca4	19274351	19274450	4.09776e-07	-26.7857								Ca4	13489551	13489700	2.72925e-07	-16.7779
Ca4	19435401	19435500	2.33764e-12	-32.5182								Ca4	13490301	13490400	2.9942e-05	-20.792
Ca4	19478601	19478700	2.57364e-12	-25.7116								Ca4	13891401	13891500	4.18791e-06	-15.1773
Ca4	19646551	19646700	4.49694e-21	-45.7136								Ca4	13894551	13894650	1.28922e-05	-16.8735
Ca4	19705301	19705450	1.78349e-12	-31.5992								Ca4	14077201	14077300	6.29681e-06	-24.7598
Ca4	20118701	20118800	1.08801e-22	-26.3587								Ca4	14761601	14761700	2.48444e-05	-17.478
Ca4	20447001	20447150	7.14303e-16	-36.6905								Ca4	14822701	14822800	2.42958e-06	-19.6384
Ca4	20451551	20451650	1.12314e-07	-26.7844								Ca4	14914751	14914850	2.08557e-06	-19.5753
Ca4	20498251	20498350	9.45644e-08	-33.296								Ca4	15154601	15154750	2.23847e-06	-22.3535
Ca4	21458701	21458800	2.74747e-15	-26.1041								Ca4	15495101	15495200	5.12044e-08	-19.0374
Ca4	21584351	21584450	1.72738e-08	-27.1545								Ca4	15507251	15507350	1.87956e-08	-23.0081
Ca4	21618951	21619100	5.44922e-09	-29.4841								Ca4	15534501	15534600	1.68881e-06	-17.997
Ca4	21884451	21884550	1.48651e-16	-29.3841								Ca4	15597651	15597750	1.57678e-05	-23.9307
Ca4	22087501	22087600	9.52041e-11	-30.8072								Ca4	15597751	15597850	3.39377e-06	-18.1071
Ca4	22088901	22089050	2.19051e-12	-49.1109								Ca4	15864401	15864500	1.4674e-06	-21.4693
Ca4	22125051	22125150	3.10347e-15	-25.4877								Ca4	16189151	16189250	1.93059e-05	-22.7591
Ca4	22182251	22182400	2.03551e-37	-49.4743								Ca4	16221051	16221150	1.04387e-05	-19.9239
Ca4	22183101	22183200	1.32643e-22	-29.543								Ca4	16601701	16601800	1.09037e-05	-23.4034
Ca4	22915451	22915650	2.60525e-40	-66.1825								Ca4	17402551	17402650	1.70589e-07	-16.0128
Ca4	23339151	23339250	1.79617e-05	-27.3938								Ca4	17971751	17971850	1.45325e-05	-20.2201
Ca4	23391801	23391900	2.10773e-12	-27.117								Ca4	18059551	18059650	4.28239e-07	-23.2921
Ca4	23475351	23475550	5.22011e-11	-37.7004								Ca4	18572301	18572400	8.7241e-07	-26.3396
Ca4	23556551	23556700	3.12391e-19	-34.993								Ca4	18576351	18576450	7.89778e-07	-20.2203
Ca4	23638851	23639000	2.74902e-29	-47.6841								Ca4	19415151	19415250	1.34074e-05	-17.964
Ca4	24892601	24892700	2.95573e-52	-65.8746								Ca4	19446551	19446650	4.93857e-07	-19.2534
Ca4	25182201	25182300	1.58364e-06	-29.3544								Ca4	19731151	19731250	1.19764e-07	-26.0855
Ca4	26360401	26360500	9.12469e-17	-37.6179								Ca4	19851401	19851550	1.48201e-07	-18.817
Ca4	26517801	26517950	1.06653e-26	-59.4108								Ca4	20013551	20013650	2.47144e-05	-15.1949
Ca4	26907001	26907150	4.48531e-09	-26.2467								Ca4	20142601	20142700	7.28743e-07	-21.5528
Ca4	26989551	26989650	1.36105e-09	-33.2546								Ca4	20165951	20166050	1.94568e-05	-20.3349
Ca4	27384501	27384650	7.51622e-09	-33.0462								Ca4	20318751	20318850	1.35394e-06	-23.8073
Ca4	27388101	27388200	4.10111e-90	-88.8889								Ca4	20330201	20330300	1.00995e-06	-17.2297
Ca4	27388201	27388300	1.05658e-09	-30.1131								Ca4	20627601	20627700	1.54709e-05	-21.3941
Ca4	27640401	27640600	3.03182e-09	-39.9043								Ca4	20750251	20750350	6.9561e-07	-15.5342
Ca4	28094951	28095050	3.55042e-11	-32.0266								Ca4	20881801	20881900	3.37612e-09	-25.8333
Ca4	28299151	28299300	3.63279e-09	-32.9284								Ca4	21054151	21054250	2.24909e-06	-25.0338
Ca4	28522001	28522100	2.49187e-17	-33.4085								Ca4	21214451	21214600	3.14703e-07	-27.2631
Ca4	29624351	29624450	1.28329e-17	-36.3636								Ca4	21225051	21225150	2.55116e-05	-15.8887
Ca4	30259951	30260100	5.2514e-21	-41.9937								Ca4	21319101	21319200	4.31068e-07	-27.3374
Ca4	30539651	30539750	9.04439e-06	-28.7106								Ca4	21327101	21327250	1.36219e-06	-19.8092
Ca4	30596951	30597050	6.89353e-08	-28.4185								Ca4	21841201	21841300	4.01427e-06	-32.286
Ca4	30765701	30765850	1.59255e-54	-83.8902								Ca4	21896901	21897000	1.76029e-08	-17.4945
Ca4	30881151	30881250	1.62744e-10	-30.0639								Ca4	21939701	21939850	1.53534e-31	-35.3638
Ca4	31135551	31135650	1.36249e-07	-26.2038								Ca4	21939801	21939950	2.8731e-22	-25.4335
Ca4	31414601	31414750	1.681e-19	-36.0329								Ca4	21939901	21940050	3.33687e-09	-17.9727
Ca4	32623751	32623850	7.36234e-19	-32.6791								Ca4	21975851	21975950	9.36668e-07	-17.9006
Ca4	33636501	33636600	3.85937e-12	-40.7889								Ca4	22019401	22019500	2.04134e-10	-21.7406
Ca4	33902101	33902200	7.43563e-20	-25.6979								Ca4	22321001	22321100	3.70362e-09	-18.5678
Ca4	34395501	34395650	1.32493e-37	-60.5856								Ca4	22344901	22345000	2.26044e-07	-27.4916
Ca4	34679701	34679850	1.12977e-12	-31.1152								Ca4	22706451	22706600	3.73979e-10	-22.2311
Ca4	34785101	34785200	5.66181e-15	-33.9187								Ca4	22706551	22706700	1.21767e-10	-26.9914
Ca4	34820651	34820750	2.68455e-14	-29.3567								Ca4	23169951	23170050	8.42451e-07	-19.2881
Ca4	35230451	35230550	5.58273e-09	-32.1839								Ca4	23371001	23371100	5.6319e-07	-16.1115
Ca4	35326351	35326450	1.44581e-09	-42.9215								Ca4	23762251	23762350	1.39554e-07	-16.4151
Ca4	36011901	36012000	1.34841e-12	-37.902								Ca4	23879851	23880000	7.9823e-12	-23.4851
Ca4	36029951	36030100	4.46436e-29	-64.755								Ca4	24208601	24208700	2.53327e-11	-19.741
Ca4	36121801	36121900	1.77444e-11	-40.2179								Ca4	25077601	25077700	1.3888e-06	-15.2416
Ca4	36157451	36157550	3.16052e-11	-31.4092								Ca4	25121001	25121150	1.49101e-06	-20.2424
Ca4	36277601	36277700	9.33246e-18	-32.5451								Ca4	25168801	25168950	2.86817e-06	-23.3565
Ca4	36278651	36278750	3.04549e-55	-30.7453								Ca4	26304151	26304250	3.06369e-06	-17.8426
Ca4	36570501	36570600	2.43601e-08	-32.2902								Ca4	26631751	26631850	9.13926e-07	-23.0776
Ca4	36571451	36571600	4.22378e-12	-28.5214								Ca4	26990901	26991000	2.61829e-06	-24.0678
Ca4	37260301	37260400	4.81936e-07	-27.819								Ca4	27187851	27187950	4.34409e-06	-24.1453
Ca4	37385301	37385450	9.35861e-33	-28.5347								Ca4	29707751	29707850	3.31354e-09	-16.232
Ca4	37636201	37636300	8.66055e-11	-32.5287								Ca4	30223701	30223850	2.7492e-06	-20.6392
Ca4	39150751	39150850	6.46685e-49	-26.882								Ca4	30267051	30267150	9.01319e-06	-17.2928
Ca4	39238751	39238900	1.64227e-11	-35.3738								Ca4	30429251	30429350	6.83988e-07	-30.0819
Ca4	39715051	39715150	1.00105e-12	-26.9231								Ca4	30794251	30794350	6.24229e-11	-26.482
Ca4	39716501	39716600	2.33569e-16	-29.6242								Ca4	31142551	31142650	2.70008e-05	-26.5504
Ca4	40353301	40353400	1.39664e-25	-65.404								Ca4	31336701	31336800	1.82366e-06	-26.6766
Ca4	40667401	40667500	1.92374e-15	-29.8851								Ca4	31945351	31945450	2.56621e-07	-15.2801
Ca4	40722351	40722450	2.00885e-10	-34.4298								Ca4	32570051	32570150	1.41395e-06	-15.7692
Ca4	40912451	40912550	5.27639e-21	-34.9449								Ca4	33054201	33054300	2.89611e-05	-16.0783
Ca4	41039701	41039900	2.48735e-12	-42.3792								Ca4	33215351	33215450	5.20107e-07	-18.5016
Ca4	41040251	41040400	9.27513e-80	-80.8834								Ca4	33346551	33346650	2.38665e-05	-15.618
Ca4	41045401	41045500	5.17504e-11	-29.1179								Ca4	33469101	33469200	3.11986e-08	-16.2459
Ca4	41416751	41416850	1.0961e-06	-32.5058								Ca4	33571101	33571200	5.66714e-12	-17.4226
Ca4	41566951	41567100	5.23176e-12	-32.2775								Ca4	33571301	33571450	5.52834e-10	-17.9496
Ca4	41805451	41805550	5.23183e-12	-32.7899								Ca4	34988301	34988400	2.78849e-05	-15.7209
Ca4	41865751	41865850	2.65417e-11	-25.0949								Ca4	35209751	35209850	1.43518e-05	-19.8865
Ca4	41934001	41934100	4.83559e-18	-38.4895								Ca4	35354401	35354550	3.59525e-07	-16.0356
Ca4	41963701	41963800	1.64582e-26	-63.4771								Ca4	35730101	35730200	4.30673e-08	-19.52
Ca4	41964251	41964350	4.31435e-25	-49.3323								Ca4	35876051	35876150	4.41018e-13	-25.4518
Ca4	41973701	41973800	1.1266e-16	-39.6656								Ca4	36131701	36131800	1.11183e-06	-20.0687
Ca4	42004651	42004800	1.86917e-19	-26.0753								Ca4	36180251	36180350	7.83635e-06	-25.4836
Ca4	43536851	43537050	3.87716e-44	-55.7184								Ca4	37506951	37507050	4.51098e-06	-20.0023
Ca4	43957051	43957150	1.01522e-06	-26.9949								Ca4	38337651	38337800	1.27797e-08	-20.2854
Ca4	44209551	44209650	4.34257e-14	-46.992								Ca4	39062201	39062300	1.5037e-07	-16.0943
Ca4	44619851	44620000	5.38833e-32	-39.5883								Ca4	39643951	39644050	6.80683e-09	-17.9669
Ca4	44785901	44786000	1.76434e-05	-28.508								Ca4	39929951	39930050	8.86235e-09	-26.9892
Ca4	45138951	45139050	1.66819e-35	-46.25								Ca4	39998901	39999000	1.20888e-05	-17.5081
Ca4	45376151	45376300	5.93349e-10	-29.0797								Ca4	40254001	40254100	2.86574e-05	-16.6704
Ca4	45481901	45482050	4.21066e-11	-25.405								Ca4	40423701	40423800	1.70249e-05	-30.4167
Ca4	45632101	45632200	1.73362e-05	-26.4765								Ca4	40441251	40441350	2.88814e-08	-20.2175
Ca4	45918851	45918950	1.76364e-22	-32.3383								Ca4	40441351	40441450	8.29416e-06	-17.3478
Ca4	46518501	46518600	2.00479e-12	-35.3713								Ca4	40629001	40629100	9.68944e-07	-24.2029
Ca4	46597351	46597450	4.794e-09	-26.1535								Ca4	40898601	40898700	2.12201e-06	-25.4336
Ca4	46605301	46605450	6.76769e-19	-34.3003								Ca4	41011651	41011750	2.22008e-05	-15.5338
Ca4	46653051	46653200	3.63209e-24	-34.3392								Ca4	41235751	41235850	1.10096e-07	-29.4483
Ca4	46872151	46872250	3.2845e-07	-27.0127								Ca4	41408651	41408750	1.76186e-06	-16.479
Ca4	46916901	46917050	1.23887e-08	-26.4151								Ca4	41803651	41803750	6.54402e-06	-16.6494
Ca4	47001251	47001400	9.10724e-12	-28.0604								Ca4	41954551	41954650	9.54327e-07	-26.0167
Ca4	47219351	47219550	3.39697e-41	-73.0412								Ca4	42839651	42839800	3.17953e-08	-16.9477
Ca4	47417351	47417500	7.79143e-17	-39.9364								Ca4	43735251	43735400	9.42606e-08	-23.3627
Ca4	47819901	47820000	5.11647e-32	-55.1802								Ca4	43968301	43968450	1.35747e-09	-22.7993
Ca4	47925551	47925650	1.32069e-06	-25.8737								Ca4	43992801	43992900	9.75842e-06	-15.2095
Ca4	48085551	48085650	2.0059e-12	-35.4023								Ca4	44504151	44504250	2.42318e-06	-18.5303
Ca4	48122551	48122650	3.45433e-09	-26.3668								Ca4	44746751	44746900	6.09951e-19	-30.6017
Ca4	48124801	48124900	1.53696e-07	-28.7617								Ca4	44924301	44924400	4.06654e-06	-18.4438
Ca4	48142751	48142850	7.94905e-17	-26.4638								Ca4	44925401	44925500	3.20324e-06	-22.3593
Ca4	48252851	48252950	6.54038e-23	-54.396								Ca4	44948701	44948800	4.06053e-08	-15.3277
Ca5	830901	831000	2.42123e-13	31.1307								Ca4	45114851	45114950	1.68643e-09	-33.0486
Ca5	1226651	1226800	4.04617e-12	30.9376								Ca4	45149701	45149800	2.16288e-06	-22.7445
Ca5	2431901	2432050	1.19381e-12	30.27								Ca4	45168951	45169050	3.83987e-16	-15.9534
Ca5	2908901	2909050	2.49141e-07	33.8411								Ca4	45365401	45365550	5.4938e-20	-21.0338
Ca5	3040951	3041050	4.42018e-15	26.0652								Ca4	45967701	45967800	5.59693e-07	-17.405
Ca5	6367501	6367650	2.8089e-08	32.3752								Ca4	46103201	46103350	2.26884e-08	-18.5723
Ca5	7082001	7082100	1.01649e-11	25.3122								Ca4	46304701	46304800	4.36524e-06	-20.4727
Ca5	7658451	7658550	2.01411e-25	43.0984								Ca4	47219551	47219700	3.37241e-24	-19.3526
Ca5	7658551	7658650	1.6121e-38	52.9989								Ca4	47461551	47461650	1.4041e-05	-15.5811
Ca5	7739151	7739250	3.29351e-05	26.2745								Ca4	47495151	47495250	1.93833e-06	-21.8777
Ca5	9027351	9027450	7.96007e-11	26.3973								Ca4	47801101	47801200	8.82314e-06	-15.1975
Ca5	9120651	9120750	9.6646e-11	27.8102								Ca4	49142001	49142100	2.94598e-06	-16.5886
Ca5	11544501	11544600	4.22977e-10	31.9754								Ca5	116751	116850	3.73424e-07	15.812
Ca5	12079651	12079750	1.75964e-08	34.7059								Ca5	180551	180650	2.94525e-07	20.8901
Ca5	12997901	12998000	1.86167e-20	39.9155								Ca5	2137951	2138050	5.57677e-06	16.5686
Ca5	13406351	13406450	4.60052e-16	41.8259								Ca5	2761701	2761800	8.61451e-06	17.528
Ca5	15017101	15017200	6.30259e-10	31.6388								Ca5	3189051	3189150	8.03272e-07	16.0526
Ca5	15783151	15783250	3.17769e-24	32.0586								Ca5	3652251	3652350	2.82302e-09	17.735
Ca5	16938401	16938500	2.11066e-17	31.9528								Ca5	3941051	3941150	1.37314e-05	25.4828
Ca5	18026951	18027050	6.10081e-14	30.4425								Ca5	6104951	6105050	6.05875e-08	15.9415
Ca5	18352351	18352450	1.17237e-10	36.7326								Ca5	6156801	6156900	1.14967e-05	15.0322
Ca5	19359051	19359150	6.58459e-16	45.2071								Ca5	6258701	6258800	1.47467e-09	21.3805
Ca5	19409801	19409950	6.84139e-10	36.4242								Ca5	7185751	7185850	1.00616e-10	31.2575
Ca5	20952301	20952400	3.94505e-07	31.9416								Ca5	7581951	7582050	1.09148e-05	32.5871
Ca5	21386851	21386950	7.84044e-14	26.8824								Ca5	8410951	8411050	4.08467e-07	15.5598
Ca5	22072201	22072300	2.11607e-15	40.1066								Ca5	9225601	9225700	2.65674e-05	17.4575
Ca5	22290651	22290750	3.30534e-05	25.1684								Ca5	9497351	9497450	6.53763e-09	16.946
Ca5	22440101	22440200	7.52888e-14	38.2524								Ca5	9968051	9968150	2.0873e-09	15.4666
Ca5	23698151	23698250	9.50468e-15	31.6027								Ca5	10449951	10450050	1.66825e-05	15.8568
Ca5	24151401	24151500	2.29129e-09	28.4976								Ca5	11710501	11710600	4.20111e-06	16.6084
Ca5	24640651	24640750	6.06863e-19	50.2432								Ca5	12338351	12338500	7.92009e-07	25.2146
Ca5	24906801	24906900	5.86313e-13	30.8192								Ca5	12518051	12518150	9.1552e-06	20.4127
Ca5	25032001	25032150	3.97921e-21	40.353								Ca5	12591801	12591900	2.23181e-09	24.8458
Ca5	25129501	25129650	4.336e-17	32.0864								Ca5	13494851	13494950	2.71065e-06	20.1439
Ca5	25473251	25473350	1.40689e-22	36.5612								Ca5	13824551	13824650	4.90483e-07	22.0652
Ca5	26024501	26024650	8.89292e-27	55.8684								Ca5	14141451	14141550	1.30577e-05	31.5714
Ca5	26138701	26138800	1.14753e-37	86.1779								Ca5	14380751	14380850	2.40214e-05	20.0564
Ca5	26194601	26194700	6.78155e-07	26.2654								Ca5	16377451	16377550	2.14806e-08	16.5099
Ca5	26343451	26343600	1.52707e-09	27.7229								Ca5	16877251	16877400	4.76825e-07	18.0358
Ca5	26957151	26957250	6.04647e-12	28.1845								Ca5	17207751	17207900	3.23213e-09	17.3943
Ca5	27726601	27726700	2.63001e-10	32.9855								Ca5	17404501	17404650	2.2242e-06	19.6731
Ca5	28280701	28280800	1.74513e-09	27.2702								Ca5	18531351	18531450	4.09521e-07	17.6104
Ca5	28575401	28575500	1.55429e-05	25.3348								Ca5	19149751	19149850	2.51439e-07	20.6293
Ca5	28972701	28972900	1.17087e-08	37.4302								Ca5	19437451	19437550	1.5197e-06	20.5172
Ca5	29468451	29468550	1.40146e-17	26.6186								Ca5	19559701	19559800	2.20464e-10	26.5463
Ca5	30287651	30287750	8.80744e-09	39.6247								Ca5	19860551	19860650	1.04828e-06	15.1221
Ca5	30420101	30420200	7.32002e-10	26.5911								Ca5	20352801	20352900	2.83979e-10	16.3059
Ca5	30420601	30420700	8.34509e-12	25.9202								Ca5	20836151	20836250	2.24068e-06	15.6877
Ca5	30490101	30490250	0.000113823	31.1026								Ca5	22051301	22051400	5.05884e-06	20.1183
Ca5	30697901	30698050	1.9585e-09	29.1709								Ca5	22243451	22243550	1.37883e-07	22.8869
Ca5	30797301	30797450	6.7771e-08	28.011								Ca5	22578251	22578350	6.4391e-08	18.2549
Ca5	31214901	31215000	3.5244e-15	44.8585								Ca5	23013901	23014000	1.10662e-06	18.859
Ca5	31224251	31224350	1.58849e-09	40.3565								Ca5	23132551	23132650	8.58107e-06	15.6909
Ca5	31352201	31352300	8.12894e-10	34.1671								Ca5	23147801	23147900	1.35377e-07	20.2594
Ca5	31402451	31402600	4.39357e-14	35.9821								Ca5	23259851	23259950	1.13622e-05	23.7023
Ca5	31935001	31935150	1.18528e-13	33.9903								Ca5	24430501	24430600	2.51558e-06	19.6367
Ca5	32061201	32061350	1.65309e-35	71.5714								Ca5	24640801	24640900	1.30585e-18	15.6869
Ca5	32174751	32174850	4.84472e-09	27.7778								Ca5	24711851	24711950	1.84294e-05	21.004
Ca5	32401451	32401600	4.28426e-31	51.0046								Ca5	24941801	24941900	2.64392e-08	18.5714
Ca5	32517051	32517150	1.68043e-06	25.1029								Ca5	25087551	25087650	1.55495e-06	15.3874
Ca5	32690051	32690200	1.84118e-22	46.7784								Ca5	25127701	25127800	3.02986e-05	17.5933
Ca5	33430351	33430450	8.22568e-17	26.3992								Ca5	25343901	25344000	3.83819e-06	15.1599
Ca5	33562751	33562850	2.17957e-10	29.7619								Ca5	25367401	25367550	2.05762e-06	22.3069
Ca5	33575151	33575250	3.42881e-27	53.4247								Ca5	25374801	25374900	3.08976e-05	16.0995
Ca5	33715851	33716000	7.37722e-06	34.4381								Ca5	25424001	25424100	1.08133e-05	17.6741
Ca5	33934101	33934200	6.57781e-09	30.381								Ca5	25649751	25649850	3.25852e-05	25.7576
Ca5	34075251	34075400	3.35747e-07	34.2621								Ca5	25763301	25763400	4.45579e-06	15.5811
Ca5	34224001	34224150	7.82181e-21	42.3591								Ca5	25817451	25817550	1.0878e-07	19.9957
Ca5	34297301	34297400	2.07077e-10	41.0375								Ca5	26086701	26086850	1.28925e-09	18.5406
Ca5	34572201	34572350	3.64962e-19	35.2563								Ca5	26230901	26231000	5.96785e-06	16.8142
Ca5	34666601	34666700	5.65517e-09	35.1102								Ca5	26345501	26345600	2.93044e-05	15.7895
Ca5	34827501	34827650	2.97485e-17	34.5386								Ca5	26467301	26467400	6.71046e-07	24.2943
Ca5	35039301	35039400	1.26407e-17	37.2822								Ca5	26503651	26503800	1.44339e-08	17.5137
Ca5	35226601	35226750	6.25658e-07	26.3135								Ca5	26799601	26799700	3.63478e-08	21.1999
Ca5	35776501	35776600	3.88442e-18	35.2138								Ca5	27132351	27132450	1.29141e-06	23.5865
Ca5	36186901	36187000	4.74675e-17	35.933								Ca5	27157901	27158000	1.33635e-06	23.2765
Ca5	36549001	36549150	1.36947e-15	36.1407								Ca5	28048651	28048750	1.60529e-06	18.7584
Ca5	37004951	37005050	1.85019e-13	40.1285								Ca5	28179701	28179800	1.63139e-06	18.7607
Ca5	37156651	37156750	6.45743e-08	28.9671								Ca5	28371051	28371150	3.10006e-06	18.6823
Ca5	37159101	37159200	0.000115316	26.9326								Ca5	28556001	28556100	1.37929e-17	15.8153
Ca5	37170151	37170250	1.24485e-06	29.2115								Ca5	28619701	28619800	7.06105e-08	21.6023
Ca5	37520801	37520900	5.37056e-35	75.2411								Ca5	28958801	28958950	9.06915e-06	19.7255
Ca5	37520901	37521050	1.81999e-42	71.3362								Ca5	29148801	29148900	5.81821e-08	25.9579
Ca5	37530751	37530850	1.24341e-06	26.8444								Ca5	29259601	29259700	6.24816e-08	15.394
Ca5	37612751	37612850	4.72052e-49	27.6027								Ca5	29294701	29294800	1.28196e-06	24.4348
Ca5	37872301	37872450	2.54145e-14	36.4805								Ca5	29516251	29516350	7.29093e-07	23.8511
Ca5	37998151	37998300	7.89738e-53	86.208								Ca5	29646201	29646300	1.99271e-06	22.7818
Ca5	38080651	38080800	1.53749e-06	30.1772								Ca5	29856851	29856950	2.50296e-05	20.7309
Ca5	38175951	38176050	9.94139e-12	25.1035								Ca5	29857151	29857250	4.7871e-06	17.0769
Ca5	38306351	38306450	2.60491e-09	29.0049								Ca5	29933251	29933350	3.1311e-06	15.095
Ca5	38391151	38391300	5.10811e-10	27.4097								Ca5	30289301	30289400	1.2208e-12	19.7117
Ca5	38663451	38663600	5.72025e-11	30.6567								Ca5	30455851	30455950	6.25414e-06	17.6276
Ca5	38666201	38666300	1.42487e-20	35.3859								Ca5	30512151	30512250	1.46668e-05	15.9909
Ca5	38953401	38953500	1.73076e-07	26.6033								Ca5	30728051	30728200	5.79922e-10	19.3789
Ca5	39141251	39141350	7.69674e-09	25.1908								Ca5	30774151	30774250	1.3675e-05	17.9055
Ca5	39393501	39393650	2.146e-22	58.3669								Ca5	30875351	30875450	2.3864e-07	20.7632
Ca5	39410701	39410900	5.89491e-17	52.4307								Ca5	31073201	31073300	1.66667e-06	23.4013
Ca5	39780801	39780900	1.32803e-14	45.7093								Ca5	31642751	31642900	2.41054e-08	21.8658
Ca5	39820651	39820750	2.07872e-32	28.6815								Ca5	32243751	32243850	8.94774e-07	18.6477
Ca5	39951201	39951300	2.54499e-07	34.1796								Ca5	32246501	32246600	6.0449e-06	16.7304
Ca5	40014051	40014150	4.39031e-13	25.1626								Ca5	32639401	32639500	2.76988e-07	21.5552
Ca5	40163551	40163650	3.1373e-11	25.7343								Ca5	33012701	33012800	2.73141e-10	21.4258
Ca5	40241951	40242100	2.14761e-16	41.0594								Ca5	33012801	33012950	4.76243e-20	27.3909
Ca5	40289951	40290100	6.4001e-11	27.1119								Ca5	33019901	33020050	1.2857e-07	19.0615
Ca5	40290601	40290800	1.95968e-15	41.2768								Ca5	33066651	33066750	1.50413e-08	28.3226
Ca5	40459701	40459850	5.10259e-18	34.7323								Ca5	33199451	33199550	3.43331e-07	18.3587
Ca5	40470801	40470950	1.07797e-10	32.3175								Ca5	33201851	33201950	3.14223e-08	25.8562
Ca5	40489151	40489250	0.000394344	25.2299								Ca5	33297051	33297150	1.25551e-06	22.517
Ca5	40640651	40640800	2.1612e-14	32.336								Ca5	33346551	33346650	3.13698e-10	28.7951
Ca5	40645251	40645350	5.15463e-20	29.9465								Ca5	33555801	33555900	4.15703e-06	21.5182
Ca5	40666401	40666500	3.1741e-12	33.2779								Ca5	33932251	33932350	1.0952e-05	15.7138
Ca5	40768051	40768150	1.54801e-12	29.1186								Ca5	34013401	34013500	2.19669e-06	15.495
Ca5	41642701	41642850	1.90957e-21	65.6229								Ca5	34255701	34255800	7.57054e-08	15.4901
Ca5	41894451	41894550	2.29997e-12	39.2258								Ca5	34656801	34656900	3.46966e-08	21.4835
Ca5	42008901	42009050	4.52527e-10	27.3112								Ca5	34871701	34871800	2.11601e-05	16.9946
Ca5	42170151	42170250	8.78519e-08	26.0086								Ca5	35029001	35029150	8.37633e-09	18.3239
Ca5	42528601	42528700	3.87519e-13	37.2732								Ca5	35110951	35111100	4.07333e-19	23.3316
Ca5	42562651	42562800	1.28383e-09	30.1869								Ca5	35292201	35292350	6.92413e-08	22.1393
Ca5	42581801	42581900	5.38091e-16	40.1262								Ca5	35364851	35364950	6.70188e-07	16.7065
Ca5	42884601	42884750	1.16342e-08	28.1971								Ca5	35508451	35508550	8.56079e-08	15.8096
Ca5	42890401	42890550	2.56702e-08	28.3485								Ca5	35711451	35711550	1.80926e-05	18.8848
Ca5	43072351	43072450	0.000305319	25.5877								Ca5	35748751	35748850	1.15694e-06	16.4218
Ca5	43210451	43210550	4.08496e-24	52.6562								Ca5	35770551	35770750	4.20613e-12	22.1909
Ca5	43752401	43752500	1.0508e-11	27.7072								Ca5	35995851	35995950	2.22513e-11	26.7086
Ca5	43919601	43919700	1.05251e-19	60.1178								Ca5	36317551	36317650	1.44051e-10	16.343
Ca5	43920601	43920750	2.04173e-19	45.4563								Ca5	36550851	36550950	1.85959e-06	16.0132
Ca5	44072251	44072350	5.7165e-14	29.7551								Ca5	36560051	36560150	1.96194e-08	30.6767
Ca5	44687001	44687150	8.73726e-08	26.4607								Ca5	36635301	36635400	7.78418e-06	15.3675
Ca5	45487801	45487900	2.61885e-14	27.7642								Ca5	36742401	36742500	1.06571e-08	18.9157
Ca5	45758501	45758600	6.61387e-12	32.0834								Ca5	37648501	37648600	1.33716e-10	24.733
Ca5	46442851	46443000	9.48195e-11	32.8856								Ca5	37649351	37649450	3.9285e-07	21.4244
Ca5	46511551	46511650	2.18816e-06	26.2821								Ca5	37702201	37702300	2.15951e-05	16.8488
Ca5	46513951	46514100	2.11202e-31	46.6132								Ca5	37734801	37734900	6.00908e-06	19.5641
Ca5	46704901	46705000	1.17688e-15	29.2475								Ca5	38393201	38393300	2.60676e-14	31.3704
Ca5	47058551	47058650	2.06941e-46	39.5662								Ca5	38722951	38723100	8.88133e-28	31.0123
Ca5	47151601	47151700	1.53177e-24	49.1803								Ca5	38727801	38727900	3.58572e-09	19.0129
Ca5	47250701	47250800	2.53246e-14	27.9666								Ca5	38759601	38759700	1.08052e-05	16.291
Ca5	47341401	47341550	1.08724e-24	39.8822								Ca5	38795151	38795250	3.26317e-05	19.3196
Ca5	47428601	47428700	9.35177e-06	31.5948								Ca5	39292551	39292650	1.56014e-06	26.6192
Ca5	47636151	47636250	3.97473e-10	32.2333								Ca5	39331501	39331600	2.34672e-06	18.8136
Ca5	47638801	47638900	8.83369e-08	29.3546								Ca5	39716551	39716650	1.17098e-05	19.8675
Ca5	47689651	47689750	6.89575e-13	37.0141								Ca5	39856501	39856650	3.87765e-09	26.6709
Ca5	133351	133450	6.16265e-28	-58.8616								Ca5	40149501	40149600	2.63396e-06	15.6263
Ca5	438851	438950	5.79268e-12	-26.3245								Ca5	40350451	40350550	2.80561e-05	16.0714
Ca5	850301	850400	5.83492e-07	-27.9461								Ca5	40560801	40560900	5.78406e-06	22.7282
Ca5	1653501	1653600	4.5463e-24	-30.6103								Ca5	40971001	40971100	1.92994e-07	28.3603
Ca5	2463401	2463500	2.4863e-12	-33.8023								Ca5	41080551	41080650	2.12026e-05	23.5301
Ca5	2464801	2464900	5.36019e-10	-30.6444								Ca5	41125001	41125100	3.25235e-08	21.1156
Ca5	3970001	3970150	9.8647e-10	-38.8								Ca5	41648451	41648550	4.16112e-10	20.9995
Ca5	3972451	3972550	6.27483e-12	-27.0833								Ca5	41943301	41943400	1.64273e-05	22.9746
Ca5	4034701	4034800	1.77463e-25	-30.2691								Ca5	42087401	42087500	1.37895e-06	21.9416
Ca5	4684851	4684950	6.1017e-27	-43.3922								Ca5	42087601	42087700	9.57951e-09	17.6109
Ca5	5505201	5505300	8.20499e-15	-45.9765								Ca5	42125651	42125750	6.94023e-06	20.7011
Ca5	5727651	5727750	5.05516e-12	-40.1418								Ca5	42471151	42471250	7.37312e-06	23.5162
Ca5	5729201	5729300	4.78417e-19	-34.5794								Ca5	43352951	43353050	4.19505e-07	17.6322
Ca5	6102401	6102500	1.32191e-24	-67.8952								Ca5	43362901	43363000	2.15339e-05	15.0997
Ca5	7253851	7253950	5.42194e-10	-34.0727								Ca5	43372551	43372650	9.22775e-06	17.6395
Ca5	7381751	7381850	6.86452e-19	-25.9665								Ca5	43380151	43380250	1.06316e-08	15.8908
Ca5	7579401	7579500	4.97595e-25	-42.3423								Ca5	43433701	43433850	1.4653e-08	18.8579
Ca5	7616051	7616150	5.34345e-15	-29.0852								Ca5	43678401	43678500	3.68442e-07	18.7753
Ca5	7637001	7637150	1.65943e-09	-31.9444								Ca5	43707751	43707850	7.52875e-08	15.2466
Ca5	8702251	8702400	2.35165e-27	-41.424								Ca5	43716701	43716800	1.17747e-05	15.125
Ca5	8702351	8702500	8.27629e-77	-76.5193								Ca5	43719951	43720050	5.47064e-06	16.0891
Ca5	8756251	8756350	1.06698e-21	-35.5936								Ca5	43809901	43810000	1.00952e-05	16.1847
Ca5	8760751	8760850	3.75139e-18	-38.8556								Ca5	44381551	44381650	4.03995e-07	17.1233
Ca5	10004551	10004650	2.33594e-56	-36.7978								Ca5	44512751	44512900	1.56503e-05	21.9234
Ca5	10214251	10214350	2.09896e-11	-38.4349								Ca5	44528651	44528800	3.63092e-06	18.1335
Ca5	10224501	10224600	9.01716e-18	-58.2975								Ca5	44650651	44650750	3.62826e-11	24.9788
Ca5	10318601	10318700	2.65413e-09	-25.8085								Ca5	45030301	45030400	3.51167e-07	20.0727
Ca5	10869151	10869250	1.67992e-06	-31.9165								Ca5	45116301	45116450	3.30127e-09	20.3863
Ca5	11065451	11065550	2.62191e-14	-29.4909								Ca5	45250051	45250200	8.87713e-08	25.78
Ca5	11110701	11110800	1.39588e-25	-39.9823								Ca5	45521601	45521750	8.25349e-15	25.5408
Ca5	11110801	11110950	3.85808e-92	-81.1357								Ca5	45582401	45582550	3.98515e-06	22.3214
Ca5	11497451	11497550	3.00203e-27	-44.9107								Ca5	45667251	45667350	1.27069e-05	16.2111
Ca5	11497551	11497750	4.16111e-10	-36.2056								Ca5	45880051	45880150	1.70843e-08	19.4275
Ca5	11794551	11794650	7.02562e-06	-33.5625								Ca5	45929951	45930100	7.62063e-06	21.426
Ca5	11846651	11846750	2.07324e-08	-29.3531								Ca5	45940801	45940950	1.70907e-06	20.5069
Ca5	12152801	12152900	1.37492e-12	-41.2115								Ca5	46019701	46019800	2.29754e-07	16.3536
Ca5	12459901	12460000	5.8514e-07	-33.0339								Ca5	46044101	46044250	1.79974e-06	25.349
Ca5	12580351	12580450	2.53993e-05	-26.2222								Ca5	46085551	46085650	1.25342e-06	15.4495
Ca5	13881901	13882000	1.60809e-13	-26.4209								Ca5	46150601	46150700	1.04493e-06	22.0461
Ca5	14299351	14299450	5.89937e-12	-38.4872								Ca5	46256551	46256650	1.39586e-06	18.2287
Ca5	15556651	15556750	3.23705e-07	-27.6513								Ca5	46315001	46315150	3.99723e-06	19.3633
Ca5	15780051	15780150	9.73845e-08	-26.2274								Ca5	46380301	46380450	3.39729e-12	24.5441
Ca5	16353501	16353600	3.72834e-11	-32.4812								Ca5	46468501	46468600	2.60639e-10	16.953
Ca5	16894301	16894400	1.8098e-07	-26.9577								Ca5	46509951	46510050	2.62614e-07	18.0889
Ca5	18350451	18350600	1.69475e-13	-40.0951								Ca5	46678951	46679050	2.82194e-11	31.3666
Ca5	18642551	18642650	2.38695e-05	-28.3883								Ca5	46742701	46742800	1.27746e-07	24.8153
Ca5	18756801	18756900	2.53796e-07	-31.746								Ca5	46832751	46832850	1.66122e-05	18.3754
Ca5	19178101	19178200	1.2562e-14	-53.75								Ca5	46845151	46845250	2.31854e-05	15.9426
Ca5	19794651	19794750	1.86306e-11	-32.1441								Ca5	46899701	46899850	7.9733e-07	17.0203
Ca5	19848251	19848350	1.7379e-09	-29.4734								Ca5	46909901	46910000	9.13903e-06	21.1538
Ca5	20085651	20085750	6.74896e-26	-57.5311								Ca5	47032601	47032700	2.70881e-05	21.1772
Ca5	20834651	20834750	1.53156e-08	-25.7139								Ca5	47619301	47619400	2.89128e-07	16.0582
Ca5	20918601	20918750	2.39193e-13	-31.3568								Ca5	47712501	47712650	6.02424e-07	18.8408
Ca5	21769101	21769200	4.7372e-14	-35.4229								Ca5	47963101	47963200	8.03359e-06	23.25
Ca5	22067401	22067500	3.39856e-05	-25.7371								Ca5	48096751	48096850	1.12915e-07	21.0136
Ca5	22167001	22167100	5.75421e-16	-29.5833								Ca5	1041801	1041900	1.9064e-05	-15.929
Ca5	22296601	22296750	1.58514e-14	-38.0226								Ca5	1046751	1046850	8.89026e-06	-15.4828
Ca5	22794601	22794700	1.02696e-13	-29.0693								Ca5	2238901	2239000	4.77317e-06	-19.2076
Ca5	22795001	22795150	4.77463e-18	-37.1651								Ca5	2732601	2732700	1.57587e-06	-22.1049
Ca5	22939951	22940100	2.75328e-22	-36.0944								Ca5	2811301	2811450	1.53053e-07	-26.43
Ca5	23278901	23279000	5.59582e-18	-47.8295								Ca5	2900051	2900150	5.57832e-10	-19.3725
Ca5	24079901	24080050	3.88852e-10	-31.0599								Ca5	2995951	2996050	2.66898e-06	-21.2499
Ca5	24410951	24411100	5.62019e-09	-30.5078								Ca5	3167001	3167100	6.12971e-10	-26.3389
Ca5	24445401	24445500	1.75565e-14	-33.0496								Ca5	3188551	3188650	6.4227e-06	-23.399
Ca5	24529451	24529550	2.03217e-06	-32.6263								Ca5	3192601	3192700	1.068e-05	-20.1401
Ca5	24641501	24641650	1.18843e-31	-28.8219								Ca5	3577601	3577700	1.0596e-06	-20.1177
Ca5	24727651	24727750	2.45962e-29	-55.2792								Ca5	3979951	3980100	1.65605e-07	-16.5032
Ca5	24828151	24828250	3.44393e-14	-30.4746								Ca5	4651051	4651150	2.27417e-05	-15.0972
Ca5	25092401	25092500	1.8908e-09	-27.2156								Ca5	4665901	4666000	2.92664e-07	-20.4767
Ca5	25106351	25106450	7.60734e-05	-26.0656								Ca5	4963501	4963600	4.68095e-08	-17.437
Ca5	25470151	25470250	6.91009e-11	-29.9379								Ca5	5094551	5094650	2.35445e-05	-18.346
Ca5	25856751	25856850	6.76499e-06	-26.4959								Ca5	5126551	5126650	1.81844e-05	-15.4444
Ca5	25962001	25962100	2.43881e-06	-29.9955								Ca5	6367751	6367850	8.61404e-07	-19.9576
Ca5	26006051	26006150	8.14922e-32	-69.4927								Ca5	7118801	7118900	1.38457e-06	-22.6088
Ca5	26384551	26384650	4.06534e-23	-53.6913								Ca5	7304401	7304500	7.60723e-06	-17.031
Ca5	26589651	26589750	2.9359e-10	-27.1834								Ca5	7462201	7462300	7.0365e-06	-15.6279
Ca5	26840501	26840650	1.15989e-28	-41.3534								Ca5	7524851	7524950	5.46427e-07	-31.7333
Ca5	27034351	27034450	8.13366e-26	-62.5524								Ca5	7633651	7633750	7.78861e-07	-19.924
Ca5	27168901	27169000	1.96268e-12	-40.6417								Ca5	8579801	8579900	2.21838e-08	-32.687
Ca5	27328651	27328750	2.2833e-08	-27.7092								Ca5	9036651	9036750	6.74197e-07	-20.3755
Ca5	27694101	27694200	6.20631e-17	-29.8507								Ca5	9482101	9482250	3.12743e-06	-20.3901
Ca5	27719251	27719350	1.66631e-21	-27.9295								Ca5	9583651	9583750	3.29781e-05	-15.9998
Ca5	27891951	27892050	2.92696e-11	-25.1695								Ca5	9706151	9706250	5.83798e-07	-15.5056
Ca5	27894951	27895100	1.19985e-33	-59.0276								Ca5	10033601	10033700	5.13998e-07	-19.6326
Ca5	28115201	28115300	9.02504e-18	-41.0266								Ca5	10542001	10542100	2.37509e-09	-26.8662
Ca5	28115351	28115450	2.11782e-31	-38.5096								Ca5	10560751	10560850	3.13983e-06	-16.2969
Ca5	28173301	28173400	5.21571e-22	-34.4269								Ca5	11329251	11329350	4.61947e-08	-18.2524
Ca5	28326451	28326550	1.41323e-15	-39.2749								Ca5	11389151	11389250	1.57366e-05	-20.509
Ca5	28487451	28487550	2.53075e-19	-26.4244								Ca5	11429401	11429500	9.09635e-07	-15.1606
Ca5	28720701	28720800	2.52869e-07	-34.7236								Ca5	11615001	11615100	1.63899e-05	-17.9912
Ca5	28950001	28950100	1.59266e-13	-35.1153								Ca5	11860051	11860200	2.73966e-09	-23.1835
Ca5	29318601	29318700	2.33752e-14	-29.3781								Ca5	11884751	11884850	1.06315e-05	-15.563
Ca5	29464501	29464650	8.68937e-27	-32.0868								Ca5	12076401	12076500	1.90571e-06	-27.9365
Ca5	29832801	29832900	4.42812e-41	-51.1991								Ca5	12580501	12580650	2.79896e-09	-15.5021
Ca5	29967601	29967700	3.24443e-17	-37.8133								Ca5	13085751	13085850	1.09906e-11	-20.8277
Ca5	30046201	30046300	3.19792e-18	-41.0526								Ca5	13122351	13122450	2.04611e-05	-18.6474
Ca5	30062901	30063000	2.36042e-11	-33.3523								Ca5	13461201	13461300	2.7584e-05	-15.3761
Ca5	30099901	30100000	1.54402e-14	-35.6736								Ca5	14050201	14050300	5.77299e-07	-16.3419
Ca5	30234551	30234700	1.97253e-22	-60.8958								Ca5	14239701	14239800	1.21988e-06	-15.9922
Ca5	30359101	30359200	3.40531e-11	-35.6643								Ca5	14876901	14877050	2.29722e-05	-15.5753
Ca5	30799601	30799700	1.85012e-29	-43.0303								Ca5	15026601	15026700	1.60092e-09	-21.012
Ca5	31100001	31100100	3.45186e-07	-25.4403								Ca5	16028501	16028600	3.02867e-05	-20.6563
Ca5	31170751	31170900	1.07432e-15	-36.3502								Ca5	16394851	16394950	2.71272e-05	-19.1003
Ca5	31221701	31221800	1.58342e-06	-31.454								Ca5	16608101	16608200	5.03942e-13	-21.0722
Ca5	31332551	31332650	1.21088e-14	-29.4331								Ca5	16852751	16852850	3.31009e-08	-19.9277
Ca5	31633651	31633750	1.4631e-07	-29.6013								Ca5	16891001	16891100	4.17979e-06	-22.5025
Ca5	31830101	31830250	4.21186e-15	-37.213								Ca5	16912001	16912100	4.13341e-06	-15.9021
Ca5	31992001	31992150	3.45749e-26	-51.5953								Ca5	16982101	16982200	2.86908e-05	-16.7311
Ca5	31996201	31996300	1.44985e-05	-28.9803								Ca5	17016951	17017050	3.81106e-07	-20.6902
Ca5	32149951	32150100	1.13397e-07	-28.0015								Ca5	17151401	17151550	7.92471e-06	-17.9126
Ca5	32504951	32505100	3.68924e-14	-26.1429								Ca5	17539301	17539400	9.64179e-08	-16.6751
Ca5	32666151	32666250	2.7193e-22	-30.5625								Ca5	17637801	17637900	4.53949e-06	-15.1645
Ca5	32838101	32838200	6.35487e-22	-29.3738								Ca5	17822151	17822250	2.57276e-05	-17.4201
Ca5	32877951	32878050	7.42062e-32	-28.264								Ca5	18256051	18256150	1.24856e-05	-16.0115
Ca5	32945001	32945150	4.07544e-15	-28.3057								Ca5	18313351	18313450	1.35888e-05	-17.0896
Ca5	33090701	33090800	4.35443e-09	-32.5217								Ca5	18568751	18568900	1.41893e-11	-17.3978
Ca5	33227351	33227450	1.06657e-16	-40.6909								Ca5	18622251	18622350	4.79334e-07	-19.2694
Ca5	33243201	33243300	5.81284e-07	-25.7311								Ca5	19011401	19011550	2.37688e-06	-16.0636
Ca5	33381351	33381500	2.21797e-45	-55.9634								Ca5	19145851	19145950	6.08661e-08	-24.3328
Ca5	33418951	33419100	6.27053e-28	-36.3881								Ca5	19360551	19360650	2.41241e-06	-24.2938
Ca5	33887201	33887350	2.27642e-18	-39.3524								Ca5	19409951	19410050	7.30649e-12	-17.8391
Ca5	34019951	34020050	1.73247e-48	-50.1075								Ca5	20245301	20245400	2.29542e-06	-19.6675
Ca5	34174651	34174800	3.04302e-29	-57.38								Ca5	20263401	20263500	1.21162e-05	-17.4911
Ca5	34441701	34441850	1.28189e-42	-55.157								Ca5	20542451	20542550	1.6084e-09	-17.8075
Ca5	34530601	34530700	3.55685e-21	-44.3296								Ca5	20740051	20740150	6.00159e-06	-16.0794
Ca5	34531101	34531200	2.07877e-17	-38.6207								Ca5	21122101	21122200	7.11001e-06	-15.331
Ca5	34572401	34572500	6.71376e-17	-30.1221								Ca5	22124801	22124900	3.21228e-05	-15.6134
Ca5	34578851	34578950	7.49949e-18	-30.1724								Ca5	22238751	22238950	5.46209e-06	-18.8896
Ca5	34627951	34628050	6.47771e-07	-25.3072								Ca5	22441351	22441550	9.45313e-09	-20.6812
Ca5	34806601	34806700	6.07073e-19	-28.4893								Ca5	23832451	23832550	3.95333e-07	-19.4275
Ca5	34808851	34808950	3.01489e-45	-36.6269								Ca5	24082351	24082450	1.90113e-05	-18.4124
Ca5	34975951	34976100	1.58735e-45	-58.1807								Ca5	24095401	24095500	2.84781e-09	-20.2416
Ca5	35056151	35056250	1.97854e-11	-30.8367								Ca5	24196901	24197000	6.71296e-09	-17.3389
Ca5	35457251	35457400	1.23679e-14	-46.3751								Ca5	24484251	24484400	1.54152e-07	-19.8871
Ca5	35666951	35667050	7.32985e-07	-29.3567								Ca5	24495551	24495650	6.40517e-06	-21.0256
Ca5	35716301	35716400	2.27226e-07	-29.7378								Ca5	24606401	24606500	8.41418e-07	-19.4246
Ca5	35787751	35787850	2.51712e-38	-41.361								Ca5	24708401	24708500	1.16181e-06	-18.2391
Ca5	35848251	35848400	1.10812e-11	-39.9379								Ca5	24952651	24952750	9.95613e-07	-21.2871
Ca5	35941651	35941800	2.10251e-17	-38.1389								Ca5	25016851	25016950	7.74487e-06	-16.2438
Ca5	35987051	35987150	6.24248e-16	-26.031								Ca5	25043351	25043450	2.09838e-09	-15.4467
Ca5	36357201	36357350	3.74738e-14	-33.467								Ca5	25355251	25355350	2.82869e-07	-23.275
Ca5	36415901	36416050	2.48849e-08	-26.1364								Ca5	25414051	25414150	2.54575e-05	-16.0857
Ca5	36866451	36866600	9.1488e-16	-37.566								Ca5	25450651	25450750	3.16695e-06	-20.3717
Ca5	37086451	37086550	1.4676e-16	-39.7318								Ca5	25478851	25479000	1.47156e-07	-25.1478
Ca5	37110551	37110650	1.64597e-11	-31.4223								Ca5	25712901	25713000	2.44115e-06	-17.5199
Ca5	37177951	37178050	9.44121e-08	-27.3807								Ca5	25784151	25784250	2.67796e-08	-21.3103
Ca5	37524951	37525050	1.35319e-21	-25.3386								Ca5	25816701	25816800	1.29126e-12	-21.3798
Ca5	37525451	37525550	4.61727e-06	-26.1694								Ca5	26256551	26256650	2.12932e-05	-19.3694
Ca5	37722151	37722250	8.07283e-95	-66.4914								Ca5	26431251	26431350	3.806e-06	-19.1058
Ca5	37731601	37731700	1.72186e-09	-25.9228								Ca5	26752151	26752250	1.1273e-05	-15.8594
Ca5	37774001	37774100	5.45832e-09	-30.6269								Ca5	26843551	26843650	1.82383e-05	-15.0658
Ca5	38089151	38089250	1.25554e-20	-36.2745								Ca5	26970301	26970400	4.38741e-07	-15.4167
Ca5	38262451	38262600	1.00599e-06	-34.6464								Ca5	27190501	27190600	2.83679e-07	-20.7117
Ca5	38307401	38307550	6.79279e-11	-51.9019								Ca5	27219551	27219650	2.63791e-08	-21.7828
Ca5	38442001	38442100	1.32721e-12	-36.0927								Ca5	27263251	27263350	2.8238e-05	-15.5522
Ca5	38482101	38482250	2.27846e-16	-28.1599								Ca5	27763901	27764050	4.19946e-18	-18.7215
Ca5	38663751	38663850	5.31749e-10	-30.0989								Ca5	27764051	27764150	1.74717e-05	-17.346
Ca5	38682801	38682900	1.72413e-15	-31.7388								Ca5	27787751	27787900	3.73905e-07	-20.1135
Ca5	38682901	38683050	6.73791e-10	-29.9449								Ca5	28192601	28192700	4.9081e-06	-15.4483
Ca5	38701051	38701200	2.74528e-53	-33.2568								Ca5	28222501	28222600	4.61278e-06	-23.3862
Ca5	39007051	39007150	1.1704e-08	-30.0052								Ca5	28474251	28474350	9.11909e-07	-19.5722
Ca5	39064651	39064750	2.39989e-11	-31.8379								Ca5	28604751	28604850	7.71104e-07	-23.4097
Ca5	39163201	39163400	8.68386e-06	-47.8318								Ca5	28972351	28972450	4.81444e-07	-15.9067
Ca5	39443251	39443450	1.34796e-08	-34.8979								Ca5	28974751	28974850	1.6975e-09	-18.62
Ca5	39981451	39981550	2.44502e-17	-32.0674								Ca5	29040601	29040700	7.54601e-06	-15.3733
Ca5	40159251	40159400	3.23383e-22	-35.3975								Ca5	29201951	29202050	2.99913e-06	-16.3442
Ca5	40426301	40426400	7.6924e-22	-38.4492								Ca5	29253501	29253600	1.84998e-07	-20.9876
Ca5	40495451	40495550	2.63253e-15	-26.1591								Ca5	29408501	29408600	3.55937e-07	-17.2465
Ca5	40578201	40578300	4.59143e-14	-30.5882								Ca5	29436851	29436950	3.01967e-05	-17.389
Ca5	40695901	40696000	8.4776e-20	-32.2512								Ca5	29525051	29525150	7.36211e-08	-27.6334
Ca5	40741701	40741800	1.75438e-15	-36.5876								Ca5	29695601	29695700	1.42683e-06	-17.2281
Ca5	41127701	41127800	1.26098e-22	-34.3219								Ca5	29740801	29740950	2.94563e-06	-17.1838
Ca5	41208301	41208400	1.51398e-18	-35.9407								Ca5	29785401	29785550	3.18454e-08	-20.3981
Ca5	41310851	41310950	3.22427e-16	-31.3164								Ca5	31445351	31445450	1.8893e-05	-18.4195
Ca5	41530451	41530550	5.68901e-11	-28.5988								Ca5	31484401	31484500	2.60843e-06	-15.7063
Ca5	41600701	41600800	4.14477e-10	-29.6296								Ca5	31530651	31530750	5.4791e-06	-18.0315
Ca5	41719101	41719200	3.88724e-16	-32.0643								Ca5	31544851	31544950	5.82713e-06	-19.5144
Ca5	41734251	41734350	6.7657e-05	-25.076								Ca5	31573201	31573350	1.38047e-06	-17.1967
Ca5	41853601	41853700	2.24263e-07	-26.5546								Ca5	31762351	31762450	8.73723e-06	-20.2499
Ca5	41891351	41891450	8.9399e-33	-68.1029								Ca5	31849651	31849750	4.08946e-09	-28.2178
Ca5	41927701	41927800	1.24331e-14	-27.6645								Ca5	32097151	32097250	1.84462e-05	-15.6461
Ca5	41943501	41943600	4.19075e-13	-34.7428								Ca5	32255051	32255200	6.24152e-07	-18.2544
Ca5	41945201	41945300	2.84288e-14	-38.3786								Ca5	32600701	32600800	4.70961e-06	-20.0153
Ca5	41977101	41977200	6.73753e-09	-27.1833								Ca5	32776001	32776100	1.78567e-05	-24.9024
Ca5	41997551	41997650	3.74928e-22	-35.9762								Ca5	32776101	32776250	1.88255e-07	-21.4402
Ca5	42029751	42029850	1.41043e-07	-29.9467								Ca5	33037151	33037250	1.40911e-06	-20.1173
Ca5	42034501	42034650	1.18782e-15	-44.715								Ca5	33048251	33048350	9.53065e-06	-19.2777
Ca5	42538451	42538550	1.07892e-14	-28.3486								Ca5	33102551	33102650	1.17376e-06	-17.2238
Ca5	42615051	42615150	1.90676e-09	-35.348								Ca5	33573251	33573400	5.01768e-06	-16.7888
Ca5	42700401	42700550	2.67423e-39	-66.1393								Ca5	33701501	33701600	6.82102e-06	-15.0975
Ca5	42810701	42810800	7.08754e-17	-59.6589								Ca5	33715651	33715850	1.98251e-08	-27.2801
Ca5	43220901	43221050	1.04945e-85	-69.8481								Ca5	33797051	33797150	2.60638e-07	-24.3427
Ca5	43248251	43248400	4.33694e-11	-39.1564								Ca5	33932701	33932800	2.14371e-05	-24.9309
Ca5	43878301	43878450	8.12601e-12	-28.4682								Ca5	33960651	33960750	7.73298e-06	-21.341
Ca5	44273401	44273500	1.71327e-35	-46.4924								Ca5	34265851	34265950	8.96614e-07	-16.6794
Ca5	44456401	44456500	4.96551e-17	-37.2671								Ca5	34664901	34665000	1.45985e-08	-19.6218
Ca5	44569101	44569200	1.84651e-07	-31.1688								Ca5	34727151	34727350	6.34962e-07	-19.2651
Ca5	44916201	44916350	4.39433e-17	-41.9818								Ca5	35111101	35111300	7.21512e-06	-18.3575
Ca5	44948451	44948600	3.56981e-20	-33.2764								Ca5	35874851	35874950	1.82956e-06	-16.9506
Ca5	45078451	45078600	2.81224e-10	-28.4626								Ca5	36033951	36034100	5.01462e-07	-17.5802
Ca5	45241501	45241600	4.24014e-13	-26.8519								Ca5	36059951	36060100	3.39297e-07	-16.8517
Ca5	45360551	45360650	4.12198e-10	-33.6724								Ca5	36086101	36086200	3.16817e-05	-24.848
Ca5	45445051	45445150	3.91681e-10	-28.005								Ca5	36166001	36166150	4.38003e-06	-21.1934
Ca5	45445751	45445850	5.10871e-07	-28.728								Ca5	36280701	36280800	1.12777e-07	-26.1148
Ca5	45532601	45532750	2.19181e-28	-51.2251								Ca5	36493401	36493500	1.04303e-05	-17.7769
Ca5	45539801	45539900	8.89193e-06	-33.0866								Ca5	37051951	37052050	5.78267e-07	-19.8289
Ca5	45750151	45750300	5.64476e-14	-49.9064								Ca5	37057101	37057200	5.38526e-06	-21.7017
Ca5	45750401	45750500	1.83429e-32	-50.3485								Ca5	37187901	37188000	1.20847e-08	-21.5449
Ca5	46074801	46074950	2.50232e-11	-30.3045								Ca5	37386601	37386750	1.71842e-06	-25.4632
Ca5	46327851	46327950	2.49418e-13	-32.6003								Ca5	37405651	37405750	1.10621e-07	-19.3878
Ca5	46710351	46710500	3.10269e-14	-47.9476								Ca5	37608151	37608250	1.38926e-05	-19.0503
Ca5	46811301	46811400	6.51031e-07	-31.5771								Ca5	37688151	37688300	1.19622e-05	-16.8515
Ca5	47009051	47009150	2.28684e-10	-36.0819								Ca5	37732601	37732700	2.70202e-07	-24.8067
Ca5	47250501	47250600	6.74484e-10	-28.7879								Ca5	37775501	37775600	4.74987e-07	-18.0882
Ca5	47251301	47251400	3.38148e-09	-27.2817								Ca5	37779351	37779450	2.43613e-06	-15.4078
Ca5	47402001	47402100	8.06701e-06	-27.0512								Ca5	37892801	37892950	4.06329e-18	-39.3071
Ca5	47416651	47416750	1.66352e-10	-28.6613								Ca5	38046151	38046250	6.76334e-08	-16.2789
Ca5	47476251	47476450	1.3841e-21	-36.8137								Ca5	38251801	38251900	2.30641e-05	-22.0109
Ca5	47635751	47635900	5.95655e-110	-92.3175								Ca5	38254501	38254600	2.81189e-05	-15.0654
Ca5	47645751	47645950	1.68647e-42	-67.0017								Ca5	38661551	38661650	1.26512e-05	-15.4125
Ca5	47824301	47824400	3.5612e-08	-32.9643								Ca5	38694801	38694900	1.62629e-07	-25.2162
Ca5	48078751	48078900	1.79162e-38	-58.2813								Ca5	38722751	38722850	1.04521e-06	-16.7276
Ca6	210601	210700	3.18949e-10	40.9597								Ca5	39682651	39682750	1.64558e-05	-21.5455
Ca6	474401	474550	5.43607e-35	39.2129								Ca5	40046301	40046450	4.85463e-08	-21.2643
Ca6	611151	611250	1.66447e-16	26.7868								Ca5	40273301	40273450	6.23083e-07	-21.3633
Ca6	642751	642850	3.60076e-16	38.6045								Ca5	40612101	40612200	5.40218e-07	-16.1017
Ca6	1247751	1247850	5.73395e-17	28.4329								Ca5	40753851	40754000	6.00714e-13	-26.4801
Ca6	1966851	1966950	1.6031e-19	38.9483								Ca5	41034501	41034600	1.84786e-05	-20.7289
Ca6	2038701	2038850	1.01897e-08	32.2252								Ca5	41314001	41314100	2.25097e-06	-15.6519
Ca6	2066501	2066600	3.63873e-12	42.6075								Ca5	41593151	41593250	2.95245e-06	-19.4035
Ca6	2504251	2504350	3.26145e-08	28.8016								Ca5	41726151	41726300	1.46029e-06	-22.7479
Ca6	2512951	2513050	8.9072e-12	32.53								Ca5	41860301	41860400	2.49401e-05	-23.5119
Ca6	2563351	2563450	3.71814e-17	31.0048								Ca5	42106601	42106700	8.69227e-06	-17.6935
Ca6	2740201	2740300	6.77324e-13	26.9164								Ca5	42369951	42370050	1.07062e-06	-19.0087
Ca6	3124101	3124200	1.80431e-12	38.9852								Ca5	42605701	42605900	7.11939e-10	-31.6083
Ca6	3291651	3291750	8.06866e-09	27.0563								Ca5	42732901	42733000	1.50985e-06	-15.8828
Ca6	3462851	3463000	4.24524e-13	42.2854								Ca5	42988701	42988800	3.4589e-06	-16.7819
Ca6	3478801	3478950	6.3554e-20	41.6677								Ca5	43154701	43154800	1.25916e-06	-18.2107
Ca6	3597951	3598050	9.29829e-07	30.1674								Ca5	43517201	43517300	5.20821e-06	-18.2942
Ca6	3633251	3633350	2.81469e-12	32.6668								Ca5	43549901	43550000	2.10154e-06	-17.5861
Ca6	3786901	3787050	8.89274e-20	38.7504								Ca5	43656551	43656700	2.88215e-05	-15.5188
Ca6	3953751	3953850	7.53872e-10	36.1838								Ca5	43706051	43706150	2.41221e-05	-20.504
Ca6	4043251	4043350	4.19661e-08	37.6816								Ca5	43706301	43706400	2.41646e-05	-16.6775
Ca6	4439101	4439200	1.32997e-13	34.3915								Ca5	43792951	43793050	8.78797e-07	-16.0676
Ca6	4981151	4981250	3.30059e-38	49.5305								Ca5	43883801	43883900	7.91841e-06	-20.4821
Ca6	5207151	5207250	9.56494e-13	38.6853								Ca5	43897051	43897150	5.70085e-09	-22.9889
Ca6	5208001	5208100	2.20714e-12	28.2353								Ca5	43985751	43985850	9.41613e-08	-17.4663
Ca6	5345501	5345650	1.04796e-17	30.364								Ca5	44351951	44352050	1.56698e-12	-34.249
Ca6	5587051	5587200	2.28183e-08	25.1488								Ca5	44442501	44442600	1.52806e-08	-17.0739
Ca6	5875851	5875950	5.31258e-12	32.2386								Ca5	44443501	44443600	1.33588e-06	-22.4361
Ca6	6885651	6885800	3.8674e-19	42.6537								Ca5	44643651	44643750	1.59786e-05	-17.1934
Ca6	6886101	6886200	4.55933e-17	47.3067								Ca5	44711451	44711550	4.52765e-06	-24.3263
Ca6	7299401	7299500	5.05222e-10	28.9125								Ca5	44724201	44724300	1.44852e-05	-15.8779
Ca6	7747251	7747350	2.34602e-07	25.6051								Ca5	44913201	44913300	2.29191e-05	-15.2544
Ca6	7752701	7752800	2.65619e-10	32.6185								Ca5	44941551	44941650	1.64729e-05	-18.8725
Ca6	7765451	7765550	1.80853e-05	25.5604								Ca5	44960251	44960350	1.36882e-05	-17.4991
Ca6	7835901	7836000	1.63186e-10	27.1621								Ca5	45007501	45007600	1.91012e-05	-21.0289
Ca6	7858951	7859100	4.10056e-09	36.2961								Ca5	45087251	45087350	9.31693e-10	-17.7596
Ca6	8106201	8106300	9.63933e-78	48.3098								Ca5	45171501	45171600	7.57779e-06	-24.0244
Ca6	8139051	8139200	1.4075e-25	53.3213								Ca5	45383451	45383550	2.09738e-07	-16.6599
Ca6	9167201	9167300	1.52584e-10	25.8824								Ca5	45548501	45548600	3.06628e-06	-15.9347
Ca6	9453051	9453150	1.51171e-11	39.8233								Ca5	45776201	45776300	7.95146e-07	-16.2306
Ca6	10026951	10027050	1.58933e-25	29.5721								Ca5	46259801	46259900	1.04235e-05	-16.893
Ca6	10628151	10628250	2.52229e-09	31.9774								Ca5	46570851	46570950	1.39585e-08	-21.1426
Ca6	10628701	10628800	4.71739e-17	33.5404								Ca5	46630201	46630300	1.94311e-05	-15.4067
Ca6	10747951	10748050	8.32475e-13	25.2672								Ca5	46636951	46637100	8.56469e-07	-22.0946
Ca6	10777051	10777200	1.47362e-12	31.9962								Ca5	46820351	46820450	9.03704e-11	-17.5721
Ca6	11127051	11127150	1.52757e-05	26.4306								Ca5	47116701	47116800	2.80891e-05	-19.4457
Ca6	11128351	11128500	1.9236e-41	38.6656								Ca5	47393651	47393750	8.25452e-06	-24.288
Ca6	11154501	11154650	1.93446e-35	34.6807								Ca5	47511101	47511200	9.83074e-09	-17.6115
Ca6	11656551	11656650	1.22956e-08	26.6968								Ca5	47666451	47666550	2.85196e-06	-24.5462
Ca6	11874001	11874100	4.64425e-21	32.3447								Ca5	47786501	47786600	1.30068e-05	-15.5158
Ca6	13196201	13196350	1.61342e-06	27.6819								Ca5	47916401	47916550	2.53841e-08	-18.6509
Ca6	13240301	13240450	1.39571e-14	35.3415								Ca5	48123551	48123650	2.86386e-06	-19.8558
Ca6	13244951	13245050	1.00924e-23	25.3288								Ca6	13201	13300	7.26438e-07	24.2126
Ca6	13294401	13294500	6.97061e-44	31.9554								Ca6	85301	85400	2.56044e-13	16.6381
Ca6	14378751	14378850	4.37325e-13	27.7518								Ca6	197801	197950	2.42582e-08	35.5613
Ca6	14451851	14451950	2.51868e-19	26.1174								Ca6	354051	354150	2.08822e-06	17.1754
Ca6	14605401	14605550	5.59648e-24	32.5852								Ca6	389101	389200	7.87388e-06	17.6253
Ca6	14628551	14628700	1.31022e-16	38.5185								Ca6	543351	543450	1.48913e-07	27.7985
Ca6	14630301	14630400	7.74333e-18	35.8607								Ca6	572901	573000	1.32148e-06	19.6001
Ca6	14718301	14718400	1.26501e-07	29.6581								Ca6	852751	852850	4.81759e-08	22.2469
Ca6	15093651	15093750	1.19589e-15	40.381								Ca6	977901	978000	2.23599e-05	15.6339
Ca6	15335001	15335100	2.63519e-14	27.6098								Ca6	1043701	1043800	1.3068e-06	19.867
Ca6	15948351	15948450	7.29108e-08	25.2073								Ca6	1055051	1055150	2.32215e-05	17.0807
Ca6	16116551	16116700	3.94763e-50	49.7278								Ca6	1075201	1075350	1.28397e-05	16.6531
Ca6	16147551	16147700	1.50024e-29	57.8716								Ca6	1084801	1084900	5.49345e-06	17.9895
Ca6	16614251	16614400	4.29805e-10	32.3006								Ca6	1233701	1233800	2.59366e-06	24.9531
Ca6	16678651	16678750	3.61096e-10	38.4411								Ca6	1409951	1410150	4.15898e-11	22.5563
Ca6	17678101	17678250	1.82502e-34	35.1962								Ca6	1696301	1696400	1.19526e-05	15.0341
Ca6	17738501	17738600	1.72504e-14	25.9602								Ca6	1786851	1786950	2.68346e-05	17.6372
Ca6	17754501	17754600	9.23718e-15	31.0667								Ca6	2059251	2059350	1.08586e-07	22.604
Ca6	17915001	17915100	8.69378e-24	26.4253								Ca6	2180901	2181050	1.42212e-07	17.9433
Ca6	17915151	17915300	1.8501e-23	28.4841								Ca6	2295401	2295500	3.43887e-06	16.2471
Ca6	18111551	18111650	1.94358e-17	29.0342								Ca6	2317751	2317900	3.96642e-09	22.614
Ca6	18447101	18447250	3.26367e-22	35.0225								Ca6	2570601	2570700	3.13688e-07	23.5473
Ca6	18588751	18588900	4.20012e-11	41.6792								Ca6	2711401	2711600	3.22401e-43	19.7573
Ca6	19440901	19441000	3.50648e-12	25.8189								Ca6	2892551	2892650	3.28172e-07	16.7604
Ca6	19633201	19633300	4.92707e-12	27.12								Ca6	3207151	3207300	1.17293e-12	28.7673
Ca6	20639651	20639750	7.82014e-14	35.1268								Ca6	3569001	3569150	5.943e-07	19.0878
Ca6	20693451	20693600	3.21698e-31	32.2818								Ca6	3642951	3643050	1.45704e-05	22.5191
Ca6	20754651	20754750	6.11072e-06	28.772								Ca6	3857401	3857550	2.54321e-05	23.2439
Ca6	21024201	21024300	1.24448e-33	63.4127								Ca6	4266251	4266350	5.70078e-08	23.5635
Ca6	21430951	21431050	1.99319e-05	25.0871								Ca6	4506051	4506150	4.56337e-10	15.8982
Ca6	21437551	21437650	4.1703e-18	32.73								Ca6	4516901	4517000	7.32727e-06	16.2559
Ca6	21473501	21473600	6.71262e-13	33.1219								Ca6	4543151	4543300	9.71984e-09	23.0756
Ca6	21864851	21864950	7.26141e-10	37.069								Ca6	4567601	4567700	2.74136e-05	16.0634
Ca6	22064251	22064350	9.81886e-08	30.4815								Ca6	4631051	4631150	2.05806e-05	15.6959
Ca6	22242401	22242500	1.48875e-08	26.6942								Ca6	4793951	4794050	5.85823e-06	17.5715
Ca6	22589301	22589400	6.46845e-11	25.6779								Ca6	4800001	4800150	4.39916e-07	20.6425
Ca6	22717951	22718100	2.77372e-26	48.2104								Ca6	4888101	4888200	1.30282e-09	40
Ca6	22758051	22758150	4.16885e-14	31.3433								Ca6	4911601	4911700	1.76615e-09	36.7814
Ca6	22759351	22759550	6.74943e-25	58.8301								Ca6	5227001	5227100	7.06967e-06	17.276
Ca6	22783051	22783150	3.39318e-34	53.7297								Ca6	5263351	5263450	9.13338e-06	16.0794
Ca6	22893551	22893700	3.09878e-18	43.3344								Ca6	5573151	5573250	1.27051e-05	17.3762
Ca6	23225701	23225800	1.18181e-07	32.7254								Ca6	6015151	6015250	1.68067e-09	15.6475
Ca6	23252751	23252850	2.10412e-10	34.4166								Ca6	6068401	6068500	2.12399e-05	16.3681
Ca6	23868451	23868600	2.80779e-17	41.4278								Ca6	6138001	6138100	2.00879e-06	16.7583
Ca6	23911601	23911750	2.90893e-19	38.9475								Ca6	6151651	6151750	5.99573e-06	20.7641
Ca6	24416651	24416800	7.77938e-09	26.1251								Ca6	6233401	6233550	3.92978e-07	20.7924
Ca6	26817601	26817700	5.73061e-06	26.2631								Ca6	6449451	6449550	1.07729e-05	21.5957
Ca6	27065901	27066000	9.57289e-09	25.2924								Ca6	6504851	6504950	1.54657e-05	19.7735
Ca6	27140701	27140800	2.38127e-10	30.7885								Ca6	6527051	6527150	1.98302e-05	15.265
Ca6	27200101	27200200	2.24682e-13	35.8301								Ca6	6641751	6641950	5.54133e-06	24.246
Ca6	27434651	27434750	8.54969e-05	27.3343								Ca6	6898201	6898300	4.46769e-08	18.437
Ca6	27822001	27822100	1.35035e-12	30.7692								Ca6	7033151	7033300	1.47035e-09	18.5889
Ca6	28086151	28086250	8.01265e-08	26.2671								Ca6	7183551	7183650	1.0483e-05	21.9502
Ca6	28142851	28143000	6.79463e-21	38.6466								Ca6	7314201	7314300	1.63725e-06	20.3679
Ca6	28658151	28658250	2.96856e-14	28.8889								Ca6	7321351	7321450	2.63117e-08	21.6186
Ca6	28706151	28706300	7.75288e-10	38.2027								Ca6	7390351	7390500	4.87424e-06	19.9351
Ca6	29152351	29152450	2.97328e-31	67.5888								Ca6	7754701	7754850	1.58099e-08	16.2611
Ca6	30773251	30773400	5.17729e-24	25.3718								Ca6	7777451	7777550	3.27833e-06	19.1667
Ca6	31006751	31006850	2.28022e-09	28.7805								Ca6	7896551	7896650	2.16388e-06	19.2856
Ca6	31230201	31230300	1.25363e-08	40.4706								Ca6	8290751	8290850	9.27631e-06	16.348
Ca6	31681501	31681600	7.9325e-06	26.7732								Ca6	8765001	8765100	8.89928e-08	25.8709
Ca6	32036551	32036650	5.76492e-07	29.5228								Ca6	8820401	8820500	1.92522e-06	18.1183
Ca6	32913851	32913950	3.24203e-06	28.2738								Ca6	8834801	8834950	1.23259e-10	24.3636
Ca6	32938351	32938500	1.79839e-48	31.694								Ca6	8834901	8835050	2.07847e-09	22.3434
Ca6	34641051	34641200	2.77094e-24	54.3424								Ca6	8835001	8835150	5.51852e-17	20.2486
Ca6	34978351	34978450	4.70208e-19	28.4528								Ca6	8835101	8835250	6.81146e-20	19.9503
Ca6	35448601	35448700	2.6725e-08	28.4768								Ca6	8840251	8840350	1.82126e-05	23.2886
Ca6	35576201	35576300	1.2846e-10	27.8178								Ca6	8948001	8948150	2.45232e-05	20.3097
Ca6	35740751	35740850	7.27668e-11	26.7425								Ca6	8972151	8972300	5.26346e-08	23.8728
Ca6	36348801	36348900	9.56041e-17	30.6977								Ca6	9004551	9004650	5.32079e-08	28.212
Ca6	36365451	36365550	8.55414e-16	38.8972								Ca6	9465851	9465950	2.62651e-07	25.0523
Ca6	37592701	37592800	8.85786e-25	38.2494								Ca6	9466151	9466300	5.26398e-06	19.1236
Ca6	38107351	38107500	6.29541e-30	48.0738								Ca6	9519451	9519550	1.91006e-09	16.8962
Ca6	38564401	38564500	3.52814e-12	36.37								Ca6	9668651	9668750	5.68895e-06	15.5844
Ca6	39750451	39750550	1.02091e-06	28.9958								Ca6	10414751	10414850	3.04356e-06	20.547
Ca6	39815701	39815800	1.4947e-07	27.3631								Ca6	10440751	10440850	1.50039e-06	18.9534
Ca6	41795451	41795550	2.57031e-09	26.7529								Ca6	10893601	10893700	2.28603e-06	17.3129
Ca6	42159851	42159950	2.70393e-13	39.471								Ca6	10974401	10974500	7.85594e-06	17.178
Ca6	42259951	42260100	6.19356e-31	46.304								Ca6	11123901	11124000	1.41563e-05	15.8858
Ca6	42566751	42566850	1.59885e-11	41.4669								Ca6	11157051	11157150	2.42153e-05	18.3266
Ca6	42639001	42639100	1.28655e-07	25.1368								Ca6	11277651	11277750	8.06436e-07	19.6252
Ca6	42732151	42732250	2.69824e-58	54.195								Ca6	11429901	11430000	4.62245e-11	33.7867
Ca6	43145151	43145300	1.29555e-25	50.3273								Ca6	11448751	11448850	1.53535e-07	17.0698
Ca6	44204601	44204700	3.73452e-05	25.2198								Ca6	11535201	11535300	1.30497e-06	19.4642
Ca6	45500651	45500800	5.30497e-28	41.087								Ca6	11729751	11729850	1.38776e-05	16.4261
Ca6	45760401	45760500	1.07813e-08	25.5834								Ca6	11930551	11930700	2.27461e-06	19.4405
Ca6	45977601	45977700	3.92267e-30	41.0976								Ca6	11941851	11941950	2.15359e-08	27.7433
Ca6	46738851	46738950	1.37867e-11	26.2063								Ca6	12675501	12675600	7.93167e-06	19.3783
Ca6	47115701	47115800	2.91588e-15	30.8164								Ca6	12765351	12765450	6.57651e-06	18.4739
Ca6	47773001	47773100	9.44466e-15	42.7216								Ca6	12832951	12833050	8.785e-07	16.8421
Ca6	47860501	47860600	1.56493e-05	30.3696								Ca6	12851351	12851450	6.12448e-08	29.2647
Ca6	48691351	48691500	1.58209e-11	29.4313								Ca6	13082351	13082450	4.45222e-06	20.5919
Ca6	48697101	48697250	4.01757e-09	25.5474								Ca6	13180851	13181000	8.6883e-08	15.5552
Ca6	49140351	49140500	1.82935e-11	26.9448								Ca6	13181001	13181100	1.15266e-06	16.6581
Ca6	49378701	49378800	4.09526e-17	25.0611								Ca6	13264751	13264850	2.38032e-06	16.067
Ca6	49589351	49589450	5.27445e-07	25.6611								Ca6	13892801	13892900	1.63169e-05	18.4
Ca6	50270201	50270300	8.7959e-15	31.7321								Ca6	13992601	13992700	5.70552e-06	16.6215
Ca6	50324301	50324400	2.16476e-18	34.208								Ca6	14014651	14014750	2.93208e-05	15.9645
Ca6	50476101	50476250	7.82559e-05	45.1618								Ca6	14240001	14240100	6.3907e-06	15.8873
Ca6	51379501	51379600	6.80851e-18	41.8605								Ca6	14624251	14624350	3.75294e-06	18.8374
Ca6	51924601	51924700	1.50084e-07	27.4436								Ca6	14665051	14665150	7.1224e-08	17.7349
Ca6	52310601	52310700	1.56823e-07	26.2071								Ca6	14804751	14804900	9.98403e-09	16.9583
Ca6	53053151	53053250	1.50443e-24	52.4353								Ca6	14866201	14866300	1.15971e-09	34.1484
Ca6	55226201	55226300	1.47919e-19	40.0943								Ca6	14873301	14873400	1.03148e-05	15.523
Ca6	56114351	56114500	8.62126e-14	35.5615								Ca6	14958851	14958950	4.09269e-06	30.042
Ca6	56559051	56559200	1.57686e-28	42.8986								Ca6	14973051	14973150	9.91378e-10	17.6326
Ca6	57181301	57181450	1.61227e-73	42.9423								Ca6	15234951	15235050	1.13434e-06	15.4711
Ca6	57181401	57181550	1.63661e-29	28.7579								Ca6	15395501	15395600	7.97525e-09	18.4498
Ca6	57754701	57754850	1.38643e-19	28.9546								Ca6	15435651	15435750	8.19696e-06	16.1484
Ca6	59007351	59007450	7.2918e-45	33.1933								Ca6	15732501	15732600	2.89361e-05	17.124
Ca6	150001	150100	3.00176e-05	-27.9987								Ca6	15831501	15831600	2.6705e-06	15.2748
Ca6	210901	211050	8.51811e-17	-31.1674								Ca6	15894051	15894150	1.58362e-10	26.7816
Ca6	520901	521000	6.41285e-15	-34.8006								Ca6	15945251	15945350	8.11491e-06	18.6733
Ca6	597351	597450	1.89917e-08	-26.9542								Ca6	16103001	16103200	5.33575e-07	18.5293
Ca6	647151	647250	3.5901e-18	-27.6533								Ca6	16640851	16641000	1.01618e-09	23.2021
Ca6	717301	717400	1.11109e-15	-30.4676								Ca6	16844301	16844400	9.66552e-06	17.3271
Ca6	1289151	1289250	8.24544e-05	-25.6778								Ca6	17109701	17109800	1.02684e-05	17.7845
Ca6	1295801	1295900	1.98286e-19	-25.6494								Ca6	17908051	17908200	3.88411e-09	15.9692
Ca6	2124851	2124950	2.82481e-14	-28.8628								Ca6	17951251	17951400	4.34781e-07	24.1772
Ca6	2183351	2183500	1.7739e-19	-44.0396								Ca6	18108501	18108650	2.71351e-05	19.7845
Ca6	2409901	2410000	7.48005e-33	-49.4811								Ca6	18108651	18108750	7.57018e-07	22.4363
Ca6	2458451	2458550	1.24404e-15	-25.362								Ca6	18138551	18138650	7.53997e-09	24.3514
Ca6	2636951	2637050	2.39364e-17	-26.2703								Ca6	18298151	18298250	2.20673e-05	17.4552
Ca6	2798801	2798900	6.42498e-11	-35.0836								Ca6	18321251	18321350	1.1989e-05	15.3729
Ca6	3054601	3054700	6.02814e-08	-30.3686								Ca6	18349251	18349350	5.58244e-06	19.366
Ca6	3117151	3117250	6.0622e-10	-44.2791								Ca6	18537451	18537550	1.56506e-05	23.6538
Ca6	3575751	3575850	1.7777e-06	-26.0739								Ca6	18835851	18835950	9.23911e-07	21.0278
Ca6	3581351	3581500	8.64332e-14	-27.0243								Ca6	18839851	18840000	1.22179e-12	20.8423
Ca6	3747601	3747700	8.01215e-12	-43.7086								Ca6	18839951	18840100	1.27548e-18	23.9047
Ca6	3749551	3749700	1.10832e-28	-40.7727								Ca6	19283151	19283250	2.22636e-06	24.4932
Ca6	3952701	3952850	4.86099e-12	-33.5065								Ca6	19286101	19286200	3.45462e-06	16.8548
Ca6	3952851	3952950	4.18348e-17	-32.7092								Ca6	19392901	19393050	2.80179e-08	24.7409
Ca6	4031801	4031900	1.2609e-20	-42.9642								Ca6	19409601	19409700	2.24007e-06	20.6764
Ca6	4221801	4221900	4.31561e-61	-67.4696								Ca6	19423951	19424050	7.22822e-06	24.3472
Ca6	4521701	4521850	6.86735e-23	-37.3744								Ca6	19425301	19425400	1.44379e-05	16.1788
Ca6	4539101	4539200	8.10765e-18	-34.7652								Ca6	19727601	19727700	8.80818e-13	19.9557
Ca6	4575701	4575800	7.57527e-12	-29.9117								Ca6	19736451	19736550	1.59912e-05	17.2844
Ca6	4805201	4805300	1.21002e-10	-31.1579								Ca6	20361251	20361350	2.82891e-05	17.6163
Ca6	4872601	4872700	1.26297e-34	-40								Ca6	20573951	20574050	2.41768e-06	16.515
Ca6	4926651	4926750	5.3843e-15	-36.3636								Ca6	20705501	20705600	6.46786e-07	17.1078
Ca6	5048951	5049050	3.49821e-08	-26.702								Ca6	20849251	20849350	6.01377e-06	16.9501
Ca6	5092351	5092450	7.33018e-14	-28.7922								Ca6	21941651	21941800	9.09459e-08	26.9064
Ca6	5128151	5128250	4.2074e-08	-29.4917								Ca6	21953451	21953550	2.50871e-07	20.7772
Ca6	5176351	5176450	8.29301e-06	-26.0036								Ca6	21995851	21995950	3.39065e-07	19.6266
Ca6	5180201	5180350	1.4945e-14	-45.0491								Ca6	22116201	22116300	9.04178e-06	28.9177
Ca6	5530051	5530200	1.32589e-17	-42.5973								Ca6	22142951	22143050	5.92143e-07	23.3462
Ca6	5787401	5787500	4.75963e-22	-39.3626								Ca6	22371501	22371600	1.90686e-07	18.5064
Ca6	6100901	6101050	5.70848e-15	-42.9645								Ca6	22414251	22414350	3.21738e-06	16.7469
Ca6	6110751	6110900	2.23108e-70	-71.1052								Ca6	22434951	22435050	9.12031e-06	28.0093
Ca6	6177801	6177950	8.44411e-12	-32.4696								Ca6	22671851	22671950	9.24461e-10	17.904
Ca6	6255751	6255850	1.01536e-06	-29.7971								Ca6	22896751	22896900	2.01647e-09	18.6059
Ca6	6539901	6540050	1.48822e-16	-39.3222								Ca6	23280701	23280800	5.32166e-06	15.0065
Ca6	6708051	6708150	6.09253e-13	-26.3547								Ca6	23309601	23309700	1.52395e-05	17.1631
Ca6	6764651	6764750	1.75641e-10	-26.2038								Ca6	23394851	23394950	1.91291e-05	29.1062
Ca6	6974251	6974350	3.74251e-08	-28.089								Ca6	23626051	23626150	6.41876e-06	15.2433
Ca6	7030801	7030900	3.05356e-23	-42.9798								Ca6	23948701	23948800	2.23672e-05	15.4462
Ca6	7076001	7076100	1.41885e-08	-36.9482								Ca6	24016051	24016150	2.439e-06	17.3961
Ca6	7084701	7084800	8.65375e-10	-34.8845								Ca6	24276001	24276100	2.05486e-07	30.8056
Ca6	7259351	7259450	2.0597e-09	-33.4231								Ca6	24282201	24282350	1.94089e-06	26.333
Ca6	7269051	7269150	3.90176e-08	-29.1741								Ca6	24678301	24678400	1.56923e-05	15.5543
Ca6	7271501	7271600	2.18005e-14	-31.8462								Ca6	26796151	26796300	2.15701e-05	17.2073
Ca6	7290501	7290600	5.2381e-18	-27.1013								Ca6	26834101	26834200	1.78262e-08	22.9954
Ca6	7566901	7567000	7.06083e-11	-28.4216								Ca6	26866051	26866150	2.3743e-06	19.9529
Ca6	7749201	7749300	1.67049e-13	-31.5664								Ca6	26944951	26945050	1.39504e-06	19.2375
Ca6	7836051	7836200	6.82266e-15	-29.6487								Ca6	26945151	26945300	1.81193e-08	19.8823
Ca6	7854701	7854800	9.85452e-10	-39.4792								Ca6	27258551	27258750	1.28899e-13	22.1416
Ca6	7877851	7877950	1.79363e-12	-33.1964								Ca6	27319851	27319950	3.86888e-09	22.7813
Ca6	7927751	7927850	1.61792e-68	-91.7526								Ca6	27321351	27321450	2.56389e-05	25.7994
Ca6	8042751	8042900	1.50507e-35	-70.8477								Ca6	27347701	27347800	8.52847e-06	17.1587
Ca6	8120151	8120250	5.40977e-27	-60.8784								Ca6	27611951	27612050	1.00778e-05	20.4386
Ca6	8137401	8137550	2.52224e-12	-36.4488								Ca6	27899151	27899250	7.02426e-07	26.159
Ca6	8657801	8657900	1.94812e-10	-34.5602								Ca6	27964051	27964150	1.94461e-05	17.3955
Ca6	8795451	8795600	2.51315e-25	-46.7506								Ca6	27990901	27991050	4.49572e-07	20.8813
Ca6	8835251	8835400	6.58418e-86	-66.2615								Ca6	28212651	28212750	1.60348e-05	19.07
Ca6	9097401	9097500	1.15808e-09	-31.1806								Ca6	28221601	28221700	8.7638e-07	16.9371
Ca6	9108151	9108250	4.61732e-12	-25.8024								Ca6	28244651	28244750	1.57061e-05	17.3477
Ca6	9167601	9167700	1.19936e-17	-32.5903								Ca6	28379701	28379800	6.39689e-09	15.1701
Ca6	9255801	9255900	3.31082e-10	-25.4708								Ca6	29121051	29121150	6.55683e-06	15.3995
Ca6	9362501	9362600	1.49661e-40	-27.5793								Ca6	29216801	29216950	8.01017e-11	27.9079
Ca6	9909251	9909350	1.01213e-08	-26.5742								Ca6	29265051	29265200	1.69386e-06	18.8478
Ca6	9944301	9944400	9.32252e-37	-32.422								Ca6	29942401	29942500	1.51546e-07	16.524
Ca6	11428101	11428250	8.15709e-09	-28.9177								Ca6	30223801	30223900	1.50337e-06	21.9654
Ca6	11442801	11442950	3.58389e-27	-34.5633								Ca6	30406201	30406300	2.5325e-07	26.9087
Ca6	11620751	11620850	9.83838e-15	-43.823								Ca6	30480351	30480450	1.66729e-05	15.3807
Ca6	11659901	11660000	8.62489e-24	-34.6885								Ca6	30843251	30843350	2.95699e-07	16.5977
Ca6	11670101	11670250	2.11841e-32	-34.2091								Ca6	30876051	30876200	3.94295e-07	20.3435
Ca6	11877751	11877950	4.21158e-32	-51.7646								Ca6	31049851	31049950	2.91755e-06	27.0463
Ca6	12625251	12625400	1.26827e-09	-31.7615								Ca6	31063751	31063850	1.8264e-05	19.7634
Ca6	12935851	12936000	1.97388e-10	-32.9303								Ca6	31185501	31185600	1.3955e-07	16.3588
[truncated: 869 more rows]

## Sheet: ST-DMRs
CG						CHG						CHH
Chr	Start	End	p-value	methylation difference		Chr	Start	End	p-value	methylation difference		Chr	Start	End	p-value	methylation difference
Ca1	81101	81250	6.68173e-13	26.3733		Ca1	724301	724400	8.00228e-13	30.4598		Ca1	202451	202550	1.28757e-05	-18.2911
Ca1	223351	223450	2.68371e-12	41.6975		Ca1	3801601	3801700	3.90203e-09	25.0987		Ca1	362151	362300	2.88741e-05	-20.8712
Ca1	420951	421100	5.11333e-09	28.3985		Ca1	3809851	3809950	1.19918e-11	25.0581		Ca1	822451	822550	3.01198e-06	-19.6681
Ca1	583051	583150	3.86454e-08	25.4706		Ca1	4532651	4532800	4.44285e-15	41.0967		Ca1	1044101	1044200	5.46568e-08	-20.7792
Ca1	593151	593250	2.12116e-12	36.2658		Ca1	4532801	4532900	2.52026e-14	38.4137		Ca1	1326301	1326450	8.57125e-06	-22.3321
Ca1	646901	647000	1.07986e-11	31.8341		Ca1	5359701	5359850	1.56656e-11	45.3811		Ca1	1371151	1371250	3.81627e-06	-15.9649
Ca1	686251	686400	7.81501e-24	39.7658		Ca1	5360301	5360450	1.22994e-09	26.3865		Ca1	2614951	2615050	5.47472e-08	-23.822
Ca1	709601	709750	7.11969e-14	44.3055		Ca1	5360401	5360550	3.13699e-09	31.1412		Ca1	3684101	3684200	1.65435e-08	-24.5763
Ca1	718201	718300	3.2611e-09	25.3486		Ca1	5360501	5360700	1.61408e-21	32.3635		Ca1	4063251	4063350	2.82679e-05	-21.3173
Ca1	718401	718550	1.32499e-13	27.0254		Ca1	5360901	5361000	3.83454e-10	25.0167		Ca1	4073551	4073700	9.23195e-06	-18.2566
Ca1	724251	724400	1.64546e-37	41.6597		Ca1	5361001	5361150	5.18243e-22	32.0163		Ca1	4405901	4406050	1.14762e-07	-18.0818
Ca1	724401	724500	8.54227e-15	41.4097		Ca1	5361101	5361250	8.04121e-10	28.7125		Ca1	4485201	4485300	1.57213e-06	-25.336
Ca1	737651	737750	1.39723e-20	43.3047		Ca1	5361201	5361350	3.05502e-14	28.4732		Ca1	4533051	4533150	2.06112e-07	-17.4354
Ca1	1136651	1136750	2.11109e-11	33.0868		Ca1	6735251	6735350	2.17612e-11	27.7362		Ca1	4957551	4957650	1.961e-05	-22.0375
Ca1	1681451	1681550	2.99789e-06	31.5308		Ca1	8228451	8228550	1.75325e-09	37.214		Ca1	5078151	5078250	6.25893e-06	-16.9877
Ca1	2232251	2232350	9.78579e-09	32.696		Ca1	9881101	9881250	2.18434e-10	37.3316		Ca1	5114351	5114450	1.64122e-20	-37.1046
Ca1	3028251	3028400	5.39216e-08	31.1087		Ca1	9881351	9881450	3.62479e-08	26.1271		Ca1	5248001	5248100	2.09347e-06	-15.7693
Ca1	3210251	3210400	6.99537e-15	33.1633		Ca1	17481801	17481900	4.01104e-08	31.5178		Ca1	5678001	5678150	6.60405e-07	-25.8022
Ca1	3256651	3256750	1.50112e-22	42.8904		Ca1	17483101	17483200	1.51726e-08	32.0489		Ca1	5726701	5726800	1.27328e-05	-27.0417
Ca1	3404201	3404350	4.66696e-07	25.2484		Ca1	17483751	17483850	5.4808e-06	25.4749		Ca1	5744201	5744300	2.46179e-08	-15.1932
Ca1	3698301	3698450	2.51948e-23	44.8422		Ca1	17987551	17987650	1.178e-20	41.466		Ca1	5780501	5780600	1.10243e-06	-18.9296
Ca1	3797601	3797700	2.00459e-05	25.6795		Ca1	17987701	17987800	4.67707e-16	36.1046		Ca1	5998551	5998650	2.91502e-05	-16.1133
Ca1	3798201	3798300	1.65635e-12	37.4292		Ca1	21864751	21864850	2.49607e-05	26.1619		Ca1	6444501	6444600	9.99325e-07	-15.0102
Ca1	3885001	3885100	2.61369e-06	28.5813		Ca1	21945751	21945850	9.50768e-15	43.7082		Ca1	7117551	7117650	4.81634e-06	-18.3145
Ca1	4058101	4058250	3.12523e-18	36.8241		Ca1	22146451	22146550	1.64623e-09	27.1342		Ca1	7214601	7214750	8.79171e-17	-30.072
Ca1	4202851	4203000	1.91288e-06	32.8651		Ca1	22488551	22488650	3.65264e-30	53.9075		Ca1	7443601	7443750	1.6727e-10	-25.3438
Ca1	4207101	4207250	1.23616e-30	39.7811		Ca1	22488651	22488800	7.95589e-14	32.4019		Ca1	7639801	7639900	1.25461e-07	-20.3217
Ca1	4232651	4232750	2.37146e-16	27.1182		Ca1	22488751	22488900	3.85372e-12	35.4961		Ca1	7642101	7642200	2.6361e-08	-17.2468
Ca1	4508201	4508300	4.73792e-07	25.0857		Ca1	22501601	22501700	2.38331e-09	26.9974		Ca1	7643901	7644000	1.31114e-07	-29.1724
Ca1	4633751	4633900	4.48938e-09	32.4422		Ca1	22599201	22599300	1.30271e-10	35.6973		Ca1	8361651	8361750	3.67888e-08	-18.7181
Ca1	4633851	4634000	2.26236e-08	27.5991		Ca1	25846651	25846750	7.19725e-06	26.4871		Ca1	8823851	8823950	9.86868e-08	-19.4444
Ca1	4642701	4642800	2.54715e-10	30.6885		Ca1	28533301	28533400	3.56392e-07	28.5077		Ca1	8865501	8865650	1.44694e-05	-17.1434
Ca1	4726301	4726400	1.83852e-05	29.6629		Ca1	30441601	30441750	4.22631e-13	37.5		Ca1	9010351	9010450	2.48071e-05	-17.3354
Ca1	4914051	4914200	1.14278e-07	28.8621		Ca1	30442051	30442150	1.7117e-11	26.4277		Ca1	9123951	9124100	5.17262e-07	-22.9564
Ca1	5016151	5016300	4.55121e-09	36.1452		Ca1	30877501	30877600	2.45078e-06	26.4672		Ca1	9179201	9179350	5.59264e-19	-23.0229
Ca1	5025151	5025250	4.3047e-14	27.0869		Ca1	31589751	31589850	8.92069e-08	32.9899		Ca1	9440551	9440650	3.74892e-13	-26.9502
Ca1	5360351	5360500	5.27405e-11	32.6036		Ca1	34166001	34166150	7.5456e-16	35.649		Ca1	9619151	9619250	2.26362e-07	-15.0197
Ca1	5574551	5574650	4.87618e-06	25.9311		Ca1	34170351	34170500	1.21706e-12	35.0316		Ca1	9963701	9963850	5.23274e-06	-20.1084
Ca1	5719101	5719200	7.07402e-06	28.4847		Ca1	34170551	34170700	4.47923e-15	39.3915		Ca1	9980601	9980700	1.41019e-05	-28.8158
Ca1	5921351	5921500	9.16661e-19	40.634		Ca1	34772701	34772850	3.6222e-06	28.6685		Ca1	10402601	10402700	1.65509e-07	-18.7345
Ca1	5933351	5933500	1.05829e-13	31.9018		Ca1	35909101	35909250	1.88664e-11	40.014		Ca1	10474301	10474400	1.16466e-09	-22.9307
Ca1	6161151	6161300	5.15613e-05	30.1891		Ca1	38918001	38918200	1.76038e-16	38.3821		Ca1	10836401	10836500	5.13802e-08	-21.1836
Ca1	6229751	6229900	5.15087e-08	31.6585		Ca1	41809851	41809950	5.34424e-10	40.6801		Ca1	11560701	11560800	1.6898e-05	-17.0675
Ca1	6265601	6265750	1.2896e-18	28.5861		Ca1	41952201	41952400	9.46871e-11	33.554		Ca1	12153351	12153450	1.97823e-05	-16.6187
Ca1	6433751	6433850	3.29113e-10	38.4979		Ca1	41953951	41954050	5.99567e-06	25.7952		Ca1	12279251	12279350	1.09347e-08	-15.59
Ca1	6592701	6592800	2.19547e-08	28.8304		Ca1	43351051	43351250	1.29853e-07	32.5381		Ca1	12329401	12329550	3.06184e-06	-24.317
Ca1	6629951	6630100	4.75884e-18	38.6782		Ca1	45641751	45641850	3.85236e-10	27.8599		Ca1	12329501	12329650	4.42981e-14	-28.3309
Ca1	6682901	6683000	5.0802e-10	35.945		Ca1	46638851	46638950	8.53464e-14	34.5198		Ca1	12663001	12663100	7.89293e-06	-21.5576
Ca1	6853401	6853600	3.69257e-13	36.1995		Ca1	1507601	1507700	1.32952e-07	-25.3739		Ca1	12682151	12682250	9.38941e-09	-23.5779
Ca1	6933051	6933150	4.90329e-10	29.787		Ca1	7763451	7763600	4.8711e-07	-35.0164		Ca1	13471201	13471300	2.70804e-08	-16.1839
Ca1	6935351	6935500	4.29569e-25	43.9641		Ca1	8230501	8230600	3.32324e-09	-31.9301		Ca1	13618801	13618900	2.04474e-06	-16.8301
Ca1	6951951	6952050	1.21913e-10	30.4069		Ca1	10202051	10202200	2.26665e-07	-29.4661		Ca1	13795801	13795900	1.80084e-06	-30.8747
Ca1	7104301	7104400	7.35101e-06	28.5328		Ca1	12025951	12026050	5.26808e-07	-29.1146		Ca1	13954551	13954650	2.05697e-05	-16.2178
Ca1	7120801	7120900	1.50721e-10	35.1334		Ca1	12033451	12033550	3.05832e-10	-31.9697		Ca1	14040001	14040100	1.02273e-06	-16.8056
Ca1	8538301	8538400	2.1301e-07	25.1082		Ca1	20029901	20030050	2.13535e-07	-26.4705		Ca1	14527651	14527750	2.6619e-07	-15.7993
Ca1	8669801	8669900	1.61431e-13	35.7708		Ca1	22087351	22087500	2.4856e-08	-27.6007		Ca1	14552301	14552400	3.47773e-08	-22.9966
Ca1	8891701	8891850	2.0899e-07	34.9425		Ca1	22087751	22087850	1.37694e-07	-28.3332		Ca1	14686951	14687050	4.58579e-07	-21.1652
Ca1	9112101	9112250	1.51512e-21	45.6517		Ca1	22378001	22378150	9.85873e-14	-38.3259		Ca1	15002651	15002750	3.71566e-06	-22.2773
Ca1	9490301	9490400	2.81774e-08	30.2287		Ca1	23665551	23665650	1.97096e-08	-25.3075		Ca1	15229951	15230050	2.62248e-05	-16.3936
Ca1	10293051	10293150	1.75237e-10	30.2618		Ca1	24480951	24481100	1.74811e-09	-34.4344		Ca1	15849451	15849550	4.23395e-08	-22.9436
Ca1	10293201	10293400	1.42953e-19	38.4629		Ca1	24481051	24481200	4.68843e-09	-26.7149		Ca1	16024851	16024950	9.19979e-07	-20.8773
Ca1	10436151	10436250	3.56433e-10	45.0521		Ca1	24492951	24493100	3.00948e-27	-50.2582		Ca1	16264301	16264400	5.65535e-06	-18.4216
Ca1	10477401	10477550	2.18543e-10	28.5758		Ca1	24493051	24493250	8.23072e-19	-35.1046		Ca1	16400201	16400300	6.72509e-06	-23.5274
Ca1	10788301	10788400	5.75466e-07	26.5842		Ca1	25889451	25889600	4.52823e-07	-31.4948		Ca1	16524301	16524400	6.77504e-10	-20.1642
Ca1	10798951	10799100	1.42501e-17	35.8494		Ca1	27571301	27571450	2.71296e-06	-33.4286		Ca1	16865951	16866050	1.24902e-07	-16.1074
Ca1	10884001	10884150	6.70949e-14	35.7438		Ca1	27696901	27697050	1.82561e-13	-36.3388		Ca1	17015351	17015450	3.78051e-06	-18.2199
Ca1	11122501	11122600	7.67396e-11	34.2112		Ca1	27936201	27936300	2.40608e-09	-31.3415		Ca1	17199901	17200000	2.58322e-06	-23.6429
Ca1	11339951	11340050	7.67447e-08	27.8058		Ca1	30072451	30072650	8.52012e-17	-31.3031		Ca1	17285351	17285450	3.01509e-06	-17.7451
Ca1	11361651	11361800	1.34123e-09	37.2519		Ca1	30072801	30072900	1.03082e-08	-27.7664		Ca1	17562801	17562900	1.16865e-06	-15.3106
Ca1	11530001	11530100	2.13828e-08	26.694		Ca1	31299801	31299900	5.54143e-10	-32.344		Ca1	17748201	17748300	2.92989e-05	-18.5407
Ca1	12054001	12054100	7.85826e-06	27.7679		Ca1	31485001	31485200	8.0132e-07	-29.0069		Ca1	17912751	17912900	2.93864e-07	-19.1633
Ca1	12200551	12200650	9.4005e-10	39.1842		Ca1	32029151	32029250	1.0466e-13	-30.5691		Ca1	17996651	17996750	1.31092e-05	-15.8915
Ca1	12204351	12204500	3.12284e-17	48.931		Ca1	32605001	32605100	7.83159e-25	-60.5768		Ca1	18117551	18117700	2.05671e-07	-19.4765
Ca1	12490901	12491000	4.56077e-13	30.1099		Ca1	36120351	36120450	3.64454e-06	-29.7354		Ca1	18176451	18176600	3.00259e-06	-18.1712
Ca1	12739201	12739300	4.31233e-11	27.2904		Ca1	40747151	40747300	1.5439e-05	-26.4203		Ca1	18845101	18845200	5.96948e-06	-23.104
Ca1	12929401	12929500	2.98794e-21	36.0648		Ca1	40747751	40747900	3.33828e-06	-31.286		Ca1	18879851	18880000	1.34837e-09	-21.1332
Ca1	13267851	13267950	7.08014e-09	27.7616		Ca1	42256551	42256650	2.27242e-05	-25.6468		Ca1	19280101	19280200	1.03863e-07	-19.0993
Ca1	13784201	13784300	3.78027e-12	31.9467		Ca1	42282451	42282600	1.97494e-10	-31.241		Ca1	20289551	20289650	7.5719e-12	-28.9147
Ca1	13804301	13804400	2.21532e-08	33.2502		Ca1	42282601	42282750	4.67847e-29	-38.0074		Ca1	20508351	20508450	4.56718e-06	-19.9025
Ca1	13813551	13813700	3.69081e-15	34.2239		Ca1	45129701	45129800	1.22677e-16	-25.3338		Ca1	20569801	20569900	8.13712e-11	-16.5693
Ca1	14394001	14394100	5.55201e-07	27.4925		Ca1	45129801	45129900	2.89362e-11	-27.2917		Ca1	21129451	21129550	2.06098e-07	-29.9403
Ca1	14552401	14552500	1.15341e-09	25.2725		Ca2	267601	267700	5.96709e-08	28.5354		Ca1	21420601	21420700	3.9483e-07	-16.662
Ca1	14656901	14657000	3.15922e-18	33.4528		Ca2	2151901	2152000	9.83001e-06	26.455		Ca1	21499851	21499950	3.64343e-06	-16.8224
Ca1	14919801	14919950	2.60099e-08	27.7127		Ca2	2935701	2935900	4.51062e-11	32.0746		Ca1	21643551	21643650	1.61103e-05	-15.8626
Ca1	15296901	15297000	2.70614e-11	29.0746		Ca2	2936401	2936550	3.68309e-17	34.2913		Ca1	21972451	21972550	8.84379e-09	-16.0276
Ca1	15439201	15439300	8.74376e-23	45.8267		Ca2	3388451	3388550	2.76339e-05	29.376		Ca1	22445301	22445400	1.07592e-10	-22.1291
Ca1	15634351	15634450	2.9617e-08	28.7179		Ca2	3978751	3978850	2.46304e-08	29.735		Ca1	22448901	22449000	8.30786e-06	-30.6916
Ca1	16161851	16161950	3.06317e-08	26.0255		Ca2	4894951	4895050	4.27423e-55	28.8817		Ca1	22667651	22667750	1.2635e-07	-21.5808
Ca1	16219801	16219950	7.75093e-09	35.6445		Ca2	6003451	6003550	7.67959e-09	30.9913		Ca1	23216101	23216200	4.31302e-06	-15.2079
Ca1	16513201	16513350	4.60399e-23	36.3798		Ca2	6340151	6340250	7.56952e-07	25.1515		Ca1	23575201	23575300	1.04868e-07	-20.4863
Ca1	17199201	17199350	5.25114e-15	33.553		Ca2	8407351	8407550	5.69942e-10	31.9867		Ca1	24014901	24015000	4.48135e-08	-17.8436
Ca1	17238301	17238500	1.86866e-12	32.2483		Ca2	8581051	8581200	8.48488e-09	28.2572		Ca1	24241701	24241800	1.81784e-05	-18.0885
Ca1	17250351	17250450	2.98421e-11	26.2632		Ca2	8581601	8581700	3.76428e-10	39.2208		Ca1	25062851	25062950	2.87184e-06	-15.4567
Ca1	17481851	17481950	8.289e-14	37.1245		Ca2	11247851	11247950	9.87644e-10	35.2525		Ca1	25063501	25063600	2.64201e-05	-19.645
Ca1	17482251	17482350	3.31578e-14	37.2241		Ca2	12600001	12600100	8.69779e-06	28.3554		Ca1	25120951	25121050	1.25641e-06	-18.1957
Ca1	17483051	17483200	9.23644e-11	31.575		Ca2	13023801	13023900	4.33865e-06	27.7778		Ca1	25949451	25949550	1.03173e-10	-32.7489
Ca1	17485351	17485450	1.25155e-17	41.1295		Ca2	13620701	13620800	3.89319e-09	26.8269		Ca1	26332801	26332900	8.52556e-07	-15.2212
Ca1	17987151	17987300	6.19338e-14	43.874		Ca2	13821951	13822050	4.48993e-09	27.156		Ca1	26448151	26448300	6.12499e-08	-21.2399
Ca1	18015551	18015650	3.86007e-12	25.8246		Ca2	15700351	15700500	2.17779e-12	34.8451		Ca1	26629351	26629450	7.68909e-13	-26.3916
Ca1	18940801	18940900	2.42423e-06	27.4581		Ca2	15730901	15731000	9.25781e-06	25.83		Ca1	27027451	27027550	7.73202e-06	-24.0353
Ca1	21947601	21947700	4.80911e-10	29.0468		Ca2	15754351	15754450	1.6262e-05	30.3266		Ca1	27224451	27224600	4.61179e-08	-16.4897
Ca1	21960551	21960700	7.96362e-16	38.9808		Ca2	16060051	16060150	9.10017e-08	25.9624		Ca1	28221951	28222050	1.32697e-06	-15.8616
Ca1	23337601	23337700	5.39368e-06	25.8875		Ca2	16125751	16125850	3.06099e-05	25.542		Ca1	29888351	29888450	1.25805e-05	-19.6345
Ca1	23558051	23558150	5.46936e-07	32.866		Ca2	20403701	20403800	5.32647e-07	32.863		Ca1	30480851	30480950	3.39585e-06	-15.7401
Ca1	24494651	24494750	1.64293e-08	31.3364		Ca2	20404001	20404200	7.67146e-19	40.2649		Ca1	30647801	30647900	2.67602e-07	-24.7443
Ca1	24548601	24548700	1.30762e-10	33.3455		Ca2	22091301	22091400	1.69221e-10	34.0496		Ca1	30744601	30744700	3.24789e-06	-23.1172
Ca1	26364351	26364450	4.56998e-07	26.4341		Ca2	22702601	22702800	5.79144e-15	26.5902		Ca1	32695301	32695400	1.00417e-05	-15.4674
Ca1	26376251	26376350	1.81398e-07	29.7205		Ca2	23353651	23353800	2.99653e-09	33.6806		Ca1	34772451	34772550	7.94272e-06	-21.6999
Ca1	26778901	26779000	1.25225e-12	38.1268		Ca2	23353751	23353950	1.95755e-26	31.9844		Ca1	35904301	35904450	4.5872e-06	-18.6615
Ca1	28956951	28957050	6.49244e-08	33.3193		Ca2	23354101	23354250	5.04007e-07	27.5157		Ca1	36745701	36745800	2.16849e-06	-19.6714
Ca1	29325951	29326050	4.55768e-09	28.6117		Ca2	23354201	23354350	2.31594e-14	35.2247		Ca1	37727851	37727950	1.0133e-10	-42.5639
Ca1	30308901	30309000	6.12155e-10	34.4819		Ca2	23354401	23354500	1.93369e-07	29.2515		Ca1	38252001	38252100	3.26668e-07	-17.424
Ca1	30582751	30582900	2.77437e-17	34.4499		Ca2	24089601	24089750	8.54461e-11	30.9379		Ca1	38703801	38703900	2.36565e-07	-16.2732
Ca1	30636551	30636650	7.85529e-10	29.0442		Ca2	24089751	24089850	4.28503e-16	38.5893		Ca1	39469751	39469850	8.97872e-06	-23.341
Ca1	30843001	30843100	2.87998e-06	29.2782		Ca2	24297251	24297350	1.04113e-07	33.3871		Ca1	39472001	39472100	8.22436e-08	-15.3184
Ca1	30877351	30877500	2.70191e-07	28.6864		Ca2	24297401	24297550	2.78361e-14	34.8625		Ca1	39967551	39967650	5.38642e-06	-15.1658
Ca1	30877551	30877650	2.68548e-10	38.0284		Ca2	27559351	27559500	2.99895e-12	36.9516		Ca1	40907301	40907450	2.88806e-06	-26.0586
Ca1	32684151	32684250	4.85787e-09	36.9681		Ca2	28892451	28892550	1.41844e-07	25.2329		Ca1	40930101	40930200	2.29941e-06	-20.9152
Ca1	34166601	34166700	1.95064e-15	44.6819		Ca2	29143901	29144000	2.74875e-06	26.3333		Ca1	41032051	41032150	1.05224e-08	-16.5041
Ca1	34398001	34398150	2.69995e-06	36.7286		Ca2	30146001	30146100	1.23262e-24	28.6052		Ca1	41614451	41614550	2.24151e-06	-24.1523
Ca1	34772651	34772800	9.10853e-12	31.5379		Ca2	30146301	30146400	4.01769e-19	25.1251		Ca1	41833751	41833850	2.12173e-06	-25.0482
Ca1	34884501	34884600	1.37888e-05	26.0075		Ca2	30475851	30475950	2.94765e-05	25.3524		Ca1	42200501	42200650	4.03649e-09	-18.2655
Ca1	35061051	35061150	3.45415e-13	36.2892		Ca2	33304151	33304350	4.69308e-15	29.0516		Ca1	42201001	42201100	6.66976e-06	-22.378
Ca1	35909101	35909200	2.03044e-07	25.8225		Ca2	33304401	33304550	2.85224e-08	26.3455		Ca1	42364551	42364650	1.13655e-06	-22.2883
Ca1	36485151	36485350	2.9409e-17	39.3197		Ca2	34515951	34516050	1.39528e-09	29.7255		Ca1	42424951	42425050	2.74039e-06	-15.6993
Ca1	36652351	36652450	6.61296e-20	34.7123		Ca2	553701	553800	3.82678e-10	-25.0764		Ca1	43095051	43095150	4.55568e-06	-27.0095
Ca1	36880601	36880700	2.28062e-19	35.6107		Ca2	1525301	1525400	5.96937e-15	-32.8972		Ca1	44079701	44079800	7.14072e-06	-25.8456
Ca1	37359601	37359700	1.39611e-12	34.6602		Ca2	2340201	2340300	3.56897e-08	-31.8594		Ca1	44321601	44321750	5.20942e-10	-28.6264
Ca1	37633451	37633550	6.11401e-05	25.9864		Ca2	2340301	2340450	7.8314e-08	-27.169		Ca1	45035951	45036050	3.90788e-07	-17.2525
Ca1	37905851	37905950	2.63038e-11	25.278		Ca2	4372351	4372450	5.79702e-07	-25.3015		Ca1	45476751	45476850	6.53883e-12	-18.0601
Ca1	38266101	38266200	1.46021e-10	26.4214		Ca2	6408051	6408150	7.71304e-08	-26.1534		Ca1	46744751	46744850	1.33888e-06	-17.0569
Ca1	39558551	39558650	1.09996e-06	26.3647		Ca2	6634901	6635100	9.7081e-10	-28.004		Ca1	46908051	46908150	5.44873e-08	-19.1007
Ca1	40093251	40093350	5.8413e-06	25.1786		Ca2	7105101	7105250	1.68178e-08	-37.0469		Ca1	47055051	47055150	3.90649e-06	-19.7803
Ca1	40335001	40335150	7.64411e-06	30.9329		Ca2	7105851	7106000	4.87366e-11	-29.8622		Ca1	47095801	47095900	3.71229e-07	-17.494
Ca1	40642451	40642550	1.18808e-07	27.6289		Ca2	8726401	8726500	3.84941e-24	-56.9149		Ca1	47187901	47188000	2.17363e-05	-18.8948
Ca1	41030651	41030800	5.91636e-10	28.6667		Ca2	8727151	8727250	6.09141e-08	-28.972		Ca1	47375851	47375950	5.00256e-07	-17.1507
Ca1	41439501	41439600	6.29023e-13	32.555		Ca2	8728051	8728250	5.68286e-17	-33.5866		Ca1	47426451	47426550	2.01401e-07	-19.3672
Ca1	41826201	41826300	7.39312e-15	49		Ca2	12595301	12595450	1.42916e-11	-30.8092		Ca1	47917401	47917500	1.61295e-07	-15.0039
Ca1	41929451	41929550	2.97352e-08	32.0112		Ca2	16246301	16246450	7.51008e-12	-27.1721		Ca1	47969901	47970000	7.85035e-06	-19.2007
Ca1	42281051	42281200	5.57994e-21	48.8395		Ca2	20144501	20144600	1.71476e-09	-30.6277		Ca1	48023101	48023200	2.71527e-05	-16.5424
Ca1	42511901	42512000	1.66653e-07	29.0992		Ca2	22712801	22712900	4.77579e-07	-25.0932		Ca1	48215401	48215500	5.03376e-06	-17.2598
Ca1	42999551	42999700	3.10543e-10	37.4047		Ca2	23034801	23034950	1.11908e-06	-26.7328		Ca1	632951	633050	1.83091e-05	23.6364
Ca1	43749701	43749800	3.59112e-07	26.1189		Ca2	23286451	23286600	7.09716e-08	-33.6012		Ca1	792001	792100	4.21654e-07	20.5619
Ca1	46527101	46527200	1.03081e-19	31.2194		Ca2	23346151	23346250	2.94836e-06	-29.0993		Ca1	969901	970000	4.67752e-11	15.312
Ca1	46778401	46778550	3.87789e-08	26.3922		Ca2	23346951	23347150	2.38575e-06	-29.4601		Ca1	1286551	1286650	2.41726e-05	16.6432
Ca1	47143501	47143650	1.18438e-13	33.9086		Ca2	25747601	25747700	1.96037e-10	-35.5138		Ca1	1578151	1578250	1.14672e-07	24.1648
Ca1	47270651	47270750	9.54613e-08	26.4477		Ca2	32510451	32510550	3.68533e-08	-25.0859		Ca1	1696101	1696250	1.47637e-06	16.6012
Ca1	47614601	47614750	1.89558e-09	46.627		Ca2	33325551	33325650	1.10681e-09	-33.2802		Ca1	2465401	2465500	1.26497e-06	17.0426
Ca1	47626401	47626500	4.28159e-05	25.8387		Ca2	36612401	36612500	3.47341e-07	-27.4148		Ca1	2644351	2644450	2.30409e-05	17.6883
Ca1	311651	311750	2.53175e-05	-25.804		Ca3	4645851	4645950	2.96863e-08	27.7287		Ca1	2778951	2779050	3.04692e-08	18.7791
Ca1	636401	636550	7.35295e-07	-37.9032		Ca3	6367151	6367250	1.12851e-06	25.2		Ca1	3063201	3063300	1.7923e-05	17.1966
Ca1	652301	652400	6.80528e-11	-35.5013		Ca3	6374551	6374650	3.4645e-06	28.5546		Ca1	3169901	3170000	1.67627e-06	15.6802
Ca1	1016151	1016250	1.56247e-08	-31.2446		Ca3	6977501	6977600	6.67806e-14	28.6377		Ca1	3215401	3215500	1.90807e-05	18.4352
Ca1	1604601	1604700	9.66394e-13	-27.9703		Ca3	9711201	9711300	4.31082e-07	35.0799		Ca1	3449701	3449800	2.33728e-06	17.7246
Ca1	1977101	1977200	2.30288e-09	-27.1212		Ca3	9711401	9711550	2.27598e-07	31.4498		Ca1	3526501	3526600	5.9274e-06	21.1912
Ca1	2484401	2484500	6.62175e-15	-34.6063		Ca3	14353151	14353250	2.79951e-08	26.1972		Ca1	3549551	3549700	2.79362e-08	18.1988
Ca1	2538951	2539050	5.3769e-08	-26.5354		Ca3	14354301	14354400	1.62409e-13	25.2332		Ca1	3616451	3616550	2.79904e-05	20.8052
Ca1	3027051	3027200	1.23947e-09	-27.0855		Ca3	15181151	15181250	2.46327e-15	36.0365		Ca1	3872501	3872600	2.45659e-07	27.2839
Ca1	3027151	3027300	5.89765e-09	-29.7541		Ca3	16363951	16364050	8.27064e-07	27.7143		Ca1	3990351	3990450	2.32863e-05	16.1038
Ca1	3294001	3294150	1.12051e-07	-28.7944		Ca3	18969701	18969850	7.82221e-11	37.01		Ca1	4175001	4175100	7.68136e-09	18.7988
Ca1	3373301	3373400	1.6555e-10	-30.1156		Ca3	19221651	19221750	1.9158e-07	30.5441		Ca1	4291701	4291800	2.34524e-05	18.9917
Ca1	3623451	3623600	4.67362e-10	-35.9503		Ca3	20643101	20643250	2.75521e-06	31.8746		Ca1	4311501	4311600	4.22049e-07	26.4732
Ca1	4258901	4259050	6.67778e-18	-36.5892		Ca3	20792451	20792600	2.59592e-19	36.8021		Ca1	4648951	4649050	3.61448e-07	16.1433
Ca1	4291501	4291600	3.76297e-07	-31.6303		Ca3	21420751	21420900	8.73247e-07	27.2983		Ca1	4775151	4775300	1.35107e-06	16.3011
Ca1	4311001	4311150	1.72174e-12	-35.1055		Ca3	21693401	21693500	3.2498e-08	25.9375		Ca1	4788751	4788850	8.4683e-06	26.0369
Ca1	4703151	4703250	5.61417e-05	-30.5727		Ca3	31232051	31232150	9.19781e-06	25.6579		Ca1	4838801	4838900	1.22937e-06	15.6174
Ca1	4941401	4941500	8.19864e-05	-25.9385		Ca3	33456251	33456350	5.19745e-08	33.7883		Ca1	4846901	4847000	1.83513e-07	15.1289
Ca1	5147201	5147300	2.95284e-09	-27.5071		Ca3	33456451	33456600	2.07135e-07	25.6636		Ca1	4873501	4873650	8.04872e-10	21.4981
Ca1	5303301	5303450	3.30352e-15	-34.062		Ca3	37765051	37765200	1.72669e-07	26.3642		Ca1	5173651	5173750	3.19379e-08	16.4194
Ca1	5681201	5681300	3.19247e-08	-28.7346		Ca3	36901	37000	2.59634e-07	-25.5		Ca1	5526751	5526850	6.31898e-06	16.8764
Ca1	5790651	5790750	1.30738e-07	-30.2705		Ca3	3722051	3722150	5.56717e-07	-31.1625		Ca1	5560851	5560950	1.9005e-08	23.21
Ca1	6099451	6099600	8.67069e-09	-30.9243		Ca3	8707551	8707650	2.15873e-07	-26.9774		Ca1	5627201	5627300	3.17731e-07	21.2088
Ca1	6380401	6380550	3.06008e-10	-32.109		Ca3	12062201	12062300	2.9106e-14	-32.6112		Ca1	5728501	5728600	3.00187e-06	17.2368
Ca1	6556301	6556400	2.58462e-05	-26.6816		Ca3	12658051	12658200	6.71384e-10	-30.297		Ca1	5776901	5777050	1.78408e-19	17.1406
Ca1	6835751	6835850	4.41629e-06	-28.6382		Ca3	14645801	14645950	8.00956e-10	-32.6823		Ca1	5867151	5867250	8.93144e-06	18.3435
Ca1	6908151	6908300	9.4812e-15	-50.0901		Ca3	21419451	21419550	1.77816e-06	-30.8891		Ca1	5937851	5937950	1.7058e-07	23.3796
Ca1	6916601	6916700	7.37898e-11	-46.2991		Ca3	21424701	21424800	9.51599e-08	-30.1411		Ca1	6042801	6042900	5.9693e-11	15.7072
Ca1	8580501	8580600	2.1705e-11	-29.2439		Ca3	21424951	21425050	2.04342e-08	-30.9054		Ca1	6219301	6219400	1.71979e-06	15.7687
Ca1	8893151	8893300	2.71633e-16	-35.5822		Ca3	22178951	22179050	7.29975e-12	-26.8231		Ca1	6556251	6556350	2.81641e-06	15.8526
Ca1	8893501	8893650	2.32463e-17	-31.8533		Ca3	23038751	23038850	3.76501e-12	-36.8266		Ca1	6561151	6561250	6.31002e-06	21.1109
Ca1	9081701	9081800	2.28473e-06	-26.35		Ca3	23754301	23754450	3.60242e-10	-28.7762		Ca1	6594751	6594850	1.29126e-10	19.5663
Ca1	9177301	9177450	5.11302e-13	-33.0806		Ca3	24189401	24189500	8.96275e-08	-26.6874		Ca1	6784251	6784350	1.80493e-09	24.0165
Ca1	9475951	9476050	3.28238e-06	-25.408		Ca3	25871301	25871450	9.95876e-12	-37.7976		Ca1	6922901	6923000	2.69274e-05	17.821
Ca1	9864551	9864650	7.69219e-08	-32.455		Ca3	25871651	25871850	1.16296e-12	-29.4024		Ca1	6926951	6927050	5.15692e-07	18.2087
Ca1	9979651	9979800	2.31486e-12	-39.2754		Ca3	27314151	27314300	6.7057e-11	-28.2244		Ca1	6962701	6962800	1.033e-07	17.1828
Ca1	10194551	10194650	1.50073e-06	-26.3768		Ca3	27455901	27456000	4.57314e-15	-30.1862		Ca1	7021701	7021850	3.22496e-08	24.0618
Ca1	10415101	10415250	9.5184e-16	-38.1822		Ca3	32944551	32944650	2.45811e-09	-29.9174		Ca1	7443851	7443950	2.08324e-06	18.3013
Ca1	10540851	10540950	7.47619e-17	-30.4009		Ca3	34885601	34885700	5.5527e-22	-63.0254		Ca1	7470451	7470550	7.03218e-10	16.9373
Ca1	10550151	10550300	4.28697e-09	-25.9477		Ca3	35395151	35395250	1.9647e-06	-29.298		Ca1	7789451	7789550	3.05132e-07	19.1727
Ca1	10974451	10974600	4.43155e-09	-28.2537		Ca4	150451	150600	2.22962e-09	28.1525		Ca1	7958851	7958950	1.25526e-05	21.5262
Ca1	11003751	11003900	1.12497e-08	-32.6654		Ca4	279251	279350	9.32901e-08	31.565		Ca1	8322851	8322950	2.34053e-07	15.1957
Ca1	11102101	11102250	5.38943e-07	-28.5276		Ca4	5465351	5465500	4.37132e-07	27.2173		Ca1	8351901	8352000	2.29518e-05	15.5317
Ca1	11529351	11529500	5.89186e-10	-27.6481		Ca4	5465501	5465600	1.71997e-10	25.2277		Ca1	8590851	8590950	9.4084e-09	15.3204
Ca1	11536401	11536550	5.26097e-10	-27.0914		Ca4	5465601	5465800	6.20824e-15	29.4296		Ca1	9091851	9091950	6.46412e-06	16.3215
Ca1	11878651	11878800	3.75232e-18	-36.1258		Ca4	5485551	5485700	2.75032e-07	32.1197		Ca1	9218751	9218850	2.73928e-05	21.1596
Ca1	12248401	12248550	9.52673e-11	-38.9597		Ca4	5486051	5486150	1.5752e-10	27.7732		Ca1	9355151	9355250	5.63745e-07	19.1547
Ca1	12890451	12890600	5.14248e-06	-29.5631		Ca4	9517951	9518050	5.019e-08	32.5104		Ca1	9416401	9416500	2.11257e-10	43.0995
Ca1	13209851	13209950	1.16103e-08	-33.4816		Ca4	10296951	10297050	1.93866e-09	32.3051		Ca1	10004101	10004200	6.14949e-10	15.8327
Ca1	13281651	13281800	1.42763e-09	-29.4479		Ca4	13510401	13510500	4.54371e-06	25.963		Ca1	10095751	10095850	2.77763e-08	16.2085
Ca1	13823901	13824000	2.36242e-08	-25.5856		Ca4	15614251	15614350	5.40771e-08	38		Ca1	10328951	10329050	1.41132e-05	18.5984
Ca1	14155401	14155550	2.96534e-06	-27.2153		Ca4	16748601	16748750	1.34579e-15	39.3216		Ca1	10611201	10611300	2.83713e-05	17.7569
Ca1	14158701	14158800	1.94839e-08	-37.8987		Ca4	19146701	19146800	7.41281e-13	32.4172		Ca1	10652701	10652800	2.93341e-06	19.3863
Ca1	14175251	14175350	0.000132204	-27.6642		Ca4	21619101	21619250	9.8277e-16	42.1794		Ca1	10824501	10824600	2.05978e-05	15.9777
Ca1	14562601	14562750	1.05924e-16	-43.8841		Ca4	21686301	21686400	3.40743e-05	25.0805		Ca1	10879601	10879700	2.23415e-06	24.4966
Ca1	14591901	14592050	1.66212e-23	-46.9036		Ca4	21976601	21976750	1.31408e-10	29.0387		Ca1	11147501	11147600	1.34805e-06	20.7782
Ca1	14609951	14610100	1.41747e-30	-53.6542		Ca4	22743051	22743200	1.21427e-06	25.2536		Ca1	11288051	11288150	1.24546e-06	23.5084
Ca1	14610051	14610200	5.63729e-17	-39.6434		Ca4	23260701	23260800	5.38211e-06	27.7027		Ca1	11376701	11376850	1.26866e-06	23.0816
Ca1	14749251	14749350	2.04828e-11	-42.2752		Ca4	23279151	23279250	8.46967e-08	36.1841		Ca1	11463801	11463900	4.96907e-08	16.1786
Ca1	15252451	15252600	2.55937e-16	-37.3221		Ca4	24774901	24775000	3.19104e-08	25.4707		Ca1	11473451	11473550	4.50063e-06	18.0013
Ca1	15252551	15252700	2.03738e-19	-34.0963		Ca4	24851851	24852000	4.69514e-10	32.2852		Ca1	11755751	11755850	1.6152e-10	22.645
Ca1	15998901	15999000	1.27279e-10	-38.6325		Ca4	25815851	25815950	2.9791e-09	27.0289		Ca1	12546201	12546300	1.07197e-07	21.6573
Ca1	16468951	16469100	1.48786e-11	-34.0294		Ca4	26543651	26543850	1.94166e-11	38.2872		Ca1	13272001	13272100	7.41324e-09	30.0433
Ca1	16524301	16524400	1.3095e-20	-47.2262		Ca4	33459601	33459700	2.72029e-14	28.5553		Ca1	13408601	13408700	7.71426e-06	16.7147
Ca1	17706401	17706500	4.50847e-08	-27.899		Ca4	33606251	33606450	3.12866e-10	32.6216		Ca1	13453401	13453500	2.26826e-08	29.1055
Ca1	17764101	17764250	1.86335e-06	-29.6984		Ca4	34484501	34484600	1.69345e-11	28.1213		Ca1	13569551	13569650	1.49398e-05	16.9501
Ca1	18527151	18527250	3.45862e-06	-26.1466		Ca4	35140901	35141050	2.54703e-21	40.0878		Ca1	13605301	13605400	3.79922e-06	18.4283
Ca1	18943051	18943200	7.67835e-19	-29.5131		Ca4	37655251	37655400	4.29036e-15	37.0976		Ca1	13748451	13748550	2.09565e-11	20.5663
Ca1	18966651	18966750	3.55122e-18	-51.3496		Ca4	39061801	39061900	8.28477e-13	29.401		Ca1	14032351	14032450	2.0912e-06	20.3483
Ca1	19399451	19399550	6.31216e-13	-28.5864		Ca4	40108551	40108700	3.59517e-08	31.7892		Ca1	14203251	14203350	5.31582e-10	28.1644
Ca1	19438551	19438700	7.68834e-18	-40.7044		Ca4	40108651	40108800	8.40601e-19	36.7763		Ca1	14293801	14294000	6.00944e-08	17.6862
Ca1	19455451	19455600	8.12849e-14	-44.3941		Ca4	40108751	40108950	2.61067e-14	34.9371		Ca1	14431401	14431500	1.23761e-06	22.4519
Ca1	19934551	19934650	2.24052e-19	-25.9772		Ca4	40507551	40507650	1.07276e-08	28.4045		Ca1	14632851	14632950	1.85341e-09	20.976
Ca1	20017801	20017900	2.93065e-12	-38.5185		Ca4	41378401	41378500	9.55798e-08	26.1364		Ca1	14695251	14695350	4.72599e-07	18.2736
Ca1	20023051	20023200	1.53018e-05	-25.8936		Ca4	41757701	41757850	3.06801e-11	27.3478		Ca1	14743401	14743500	6.06763e-07	21.9052
Ca1	20029851	20030000	3.11881e-11	-30.2995		Ca4	43209001	43209100	9.13132e-14	36.9687		Ca1	14755351	14755450	2.04847e-07	19.0085
Ca1	20036551	20036650	2.58853e-06	-26.9195		Ca4	44476801	44476900	1.19153e-09	34.457		Ca1	14804051	14804150	2.11964e-05	19.2633
Ca1	20277751	20277900	3.60861e-07	-36.2156		Ca4	2099851	2100000	3.9888e-07	-37.9586		Ca1	15123901	15124000	8.03276e-06	15.2552
Ca1	20407901	20408000	9.08395e-05	-27.6634		Ca4	14158201	14158300	2.44887e-06	-28.6752		Ca1	15413701	15413800	1.83126e-05	21.3392
Ca1	21051901	21052000	1.06878e-07	-33.3333		Ca4	14184351	14184500	2.26492e-11	-31.1945		Ca1	15594751	15594850	2.31491e-08	16.9017
Ca1	21116851	21116950	1.92372e-10	-29.3038		Ca4	14191701	14191800	6.09871e-10	-26.3988		Ca1	15601201	15601300	6.95938e-07	19.1017
Ca1	21853751	21853850	8.44654e-10	-28.3007		Ca4	15439451	15439550	2.04242e-05	-25.7013		Ca1	15667901	15668000	1.28984e-07	16.4761
Ca1	22278951	22279050	8.2226e-07	-28.6337		Ca4	18737601	18737800	3.48487e-21	-32.8634		Ca1	15957601	15957700	1.15595e-06	17.6942
Ca1	24683651	24683800	1.79709e-08	-36.4259		Ca4	22710551	22710700	5.06749e-10	-28.2266		Ca1	16045701	16045800	1.07925e-05	20.0929
Ca1	25084251	25084350	1.31338e-12	-41.8203		Ca4	22710701	22710800	1.00793e-11	-35.6461		Ca1	16048001	16048150	3.52237e-09	18.9025
Ca1	26130101	26130250	9.35821e-31	-30.2626		Ca4	27183751	27183900	4.04834e-06	-27.626		Ca1	16242901	16243000	1.72014e-06	15.4847
Ca1	26206501	26206650	7.60611e-08	-29.6462		Ca4	30290851	30291050	1.81695e-08	-31.6361		Ca1	16501301	16501400	4.45412e-09	20.9925
Ca1	26206601	26206750	1.09814e-27	-30.7569		Ca4	33841051	33841200	4.07738e-09	-33.2301		Ca1	16958051	16958150	7.10784e-07	17.5806
Ca1	26206701	26206850	8.89046e-17	-27.615		Ca4	35347051	35347150	1.69688e-12	-43.0161		Ca1	16986901	16987000	2.87008e-07	31.9326
Ca1	26472401	26472500	1.10722e-05	-25.5677		Ca4	36207701	36207850	5.86979e-08	-36.0748		Ca1	17336551	17336650	2.34453e-07	19.5095
Ca1	26856551	26856700	1.79631e-09	-30.2059		Ca4	40201551	40201650	6.10244e-10	-28.4035		Ca1	17572951	17573050	1.02752e-05	16.7752
Ca1	26994351	26994450	2.70849e-10	-40.7074		Ca4	42645601	42645700	3.32979e-12	-36.463		Ca1	17790101	17790200	2.80633e-06	16.6211
Ca1	27505101	27505250	2.35332e-14	-39.9827		Ca4	47764051	47764150	1.07542e-07	-25.6889		Ca1	17839501	17839650	3.24513e-06	19.172
Ca1	27849051	27849200	1.34867e-09	-29.8278		Ca4	47901251	47901350	8.02026e-07	-30.2777		Ca1	17979651	17979750	6.45579e-07	20.8325
Ca1	28344251	28344400	9.77503e-09	-30.6842		Ca4	47901451	47901550	8.68394e-10	-33.1159		Ca1	18107151	18107250	2.72955e-05	21.858
Ca1	28932751	28932950	1.80754e-07	-31.3159		Ca4	48689901	48690050	3.97803e-07	-28.7677		Ca1	18680351	18680450	1.6853e-06	18.6201
Ca1	30186301	30186400	2.82679e-07	-28.1776		Ca5	352901	353050	3.082e-10	28.2059		Ca1	18788901	18789000	2.94803e-10	20.452
Ca1	30279451	30279550	2.0076e-10	-25.0538		Ca5	5216301	5216400	3.38809e-12	31.9124		Ca1	19447101	19447200	5.07376e-09	15.154
Ca1	30313751	30313850	2.97648e-11	-29.6494		Ca5	5921751	5921850	4.50341e-09	34.5444		Ca1	19806001	19806100	7.10187e-09	18.3697
Ca1	30917151	30917250	4.45531e-09	-25.018		Ca5	9728401	9728550	2.52788e-06	31.5078		Ca1	20186051	20186200	1.97223e-07	21.2139
Ca1	31300451	31300650	3.58684e-06	-28.126		Ca5	9729051	9729200	2.27277e-12	29.8677		Ca1	20189651	20189800	5.00052e-11	18.2442
Ca1	31485001	31485100	1.10041e-09	-33.9954		Ca5	10411851	10411950	3.42616e-08	26.0317		Ca1	20218201	20218300	1.49763e-06	19.8147
Ca1	31659651	31659750	2.67296e-08	-36.4646		Ca5	11772701	11772850	1.98811e-06	27.2487		Ca1	20254851	20254950	3.21741e-08	17.9146
Ca1	32029201	32029400	1.42725e-10	-29.8127		Ca5	11773101	11773250	8.67856e-11	37.635		Ca1	20311351	20311450	2.22937e-07	18.1066
Ca1	33058151	33058250	5.93905e-12	-36.1096		Ca5	11773351	11773550	3.58118e-08	27.664		Ca1	20404051	20404150	8.90532e-07	16.3903
Ca1	33161051	33161200	1.71397e-14	-31.5129		Ca5	11773651	11773800	3.62907e-07	27.0328		Ca1	20471951	20472100	1.43399e-06	20.5764
Ca1	34320901	34321000	2.08781e-20	-35.2102		Ca5	12385301	12385450	1.39918e-25	43.5067		Ca1	20546551	20546650	6.82838e-06	19.3723
Ca1	34321501	34321600	6.61568e-10	-32.4282		Ca5	12666851	12667000	5.83915e-15	32.0098		Ca1	20797301	20797400	4.66002e-06	15.6775
Ca1	34724601	34724700	3.68889e-13	-33.9267		Ca5	13074901	13075000	2.46732e-07	27.2625		Ca1	20817001	20817100	2.90477e-05	15.2384
Ca1	34840301	34840400	2.12498e-07	-26.1451		Ca5	14259551	14259650	8.51398e-06	29.687		Ca1	20835951	20836050	2.52512e-06	15.0993
Ca1	35243251	35243350	7.80487e-05	-26.8122		Ca5	14260301	14260450	6.82435e-13	37.1125		Ca1	20854401	20854500	2.62738e-05	19.772
Ca1	35281051	35281150	3.0199e-12	-35.7414		Ca5	16414101	16414200	1.11789e-12	28.4024		Ca1	20963701	20963800	1.9539e-07	18.4213
Ca1	35439701	35439850	1.33566e-10	-34.1518		Ca5	16414251	16414350	2.05717e-14	28.3643		Ca1	20972801	20972900	1.11785e-07	20.5235
Ca1	35439801	35439950	2.52179e-05	-28.9149		Ca5	16538401	16538600	7.19277e-09	30.5566		Ca1	21146151	21146250	3.28911e-08	30.4263
Ca1	36120501	36120600	2.8211e-14	-43.925		Ca5	18921501	18921650	6.91264e-15	39.3129		Ca1	21193351	21193500	5.851e-08	24.458
Ca1	36780751	36780850	1.01683e-11	-36.9586		Ca5	20369951	20370050	1.64331e-16	35.1309		Ca1	21248301	21248400	1.40531e-08	19.6325
Ca1	37240051	37240200	3.87888e-11	-30.7284		Ca5	24305051	24305150	6.27929e-06	32.1701		Ca1	21324101	21324200	2.66582e-10	22.7675
Ca1	37261251	37261350	1.43942e-06	-30.3216		Ca5	24640401	24640500	6.78382e-07	28.7162		Ca1	21352901	21353000	1.26705e-05	20.4582
Ca1	39443401	39443550	1.44167e-09	-36.0518		Ca5	24640901	24641000	4.30523e-06	25.5437		Ca1	21449101	21449200	1.53306e-05	21.76
Ca1	39734251	39734350	2.87912e-11	-30.6166		Ca5	25268251	25268350	1.04474e-12	43.7407		Ca1	21542451	21542600	1.70563e-06	20.78
Ca1	40230801	40230950	6.23977e-11	-29.5155		Ca5	27090701	27090900	2.49399e-20	44.0942		Ca1	21543301	21543400	1.28255e-05	20.6439
Ca1	40411251	40411350	4.27478e-09	-26.855		Ca5	28192151	28192250	3.67525e-08	38.0349		Ca1	21825151	21825250	1.15273e-06	20.8466
Ca1	40747201	40747350	1.74537e-10	-30.6873		Ca5	28685901	28686000	1.43632e-11	33.5334		Ca1	21957951	21958100	1.99723e-05	21.1389
Ca1	41055651	41055750	1.66303e-08	-30.6935		Ca5	28969501	28969600	3.44237e-13	42.0143		Ca1	22416351	22416450	3.13938e-16	22.971
Ca1	41057801	41057900	3.68125e-09	-29.6296		Ca5	31219901	31220100	2.7536e-07	29.0938		Ca1	22724501	22724600	4.2521e-08	15.8578
Ca1	41303751	41303850	7.79823e-09	-29.5357		Ca5	35900601	35900700	5.68872e-09	37.3312		Ca1	23037651	23037800	3.52683e-09	18.6933
Ca1	42250951	42251050	5.88421e-08	-30.4413		Ca5	38629251	38629400	8.98002e-13	34.8116		Ca1	23105051	23105150	3.23512e-09	17.8964
Ca1	42282501	42282650	1.07188e-14	-37.2941		Ca5	39019801	39019900	5.24238e-11	31.9535		Ca1	24001051	24001150	6.22392e-06	16.3875
Ca1	42491601	42491750	8.15676e-10	-30.1742		Ca5	43105401	43105500	3.18774e-05	26.3222		Ca1	24064501	24064600	1.45435e-05	17.6123
Ca1	42491701	42491850	2.32428e-23	-40.3698		Ca5	44200051	44200150	1.35378e-07	29.2548		Ca1	24082251	24082350	8.74461e-06	27.535
Ca1	42889001	42889100	2.56704e-07	-28.9645		Ca5	47113601	47113750	9.91679e-09	36.487		Ca1	24290051	24290150	2.71394e-05	17.5763
Ca1	42889751	42889900	1.64079e-06	-27.2386		Ca5	47605801	47605950	1.77319e-11	37.3817		Ca1	24325701	24325850	3.358e-06	23.7459
Ca1	43152251	43152350	2.44053e-07	-34.9659		Ca5	397051	397200	7.92187e-06	-27.9059		Ca1	24492051	24492200	3.27537e-10	26.5736
Ca1	43532201	43532400	5.38296e-13	-27.1863		Ca5	1735351	1735450	3.50463e-11	-26.7492		Ca1	25119501	25119600	1.09645e-05	21.6475
Ca1	43532701	43532850	5.82245e-12	-26.2046		Ca5	2940851	2940950	3.74536e-06	-25.6643		Ca1	25190351	25190500	3.20207e-10	21.2207
Ca1	43532901	43533000	2.60851e-12	-28.1215		Ca5	6290501	6290650	3.35294e-18	-29.5164		Ca1	25350501	25350600	4.9237e-07	15.6538
Ca1	43976451	43976550	2.18714e-07	-33.479		Ca5	7097451	7097550	1.17869e-10	-28.7411		Ca1	25853701	25853800	2.61606e-06	19.8901
Ca1	44218701	44218850	2.43218e-09	-30.8666		Ca5	7496451	7496600	2.14233e-10	-34.567		Ca1	26255251	26255350	2.26632e-05	18.9042
Ca1	44525601	44525700	4.63375e-09	-27.2665		Ca5	8490151	8490250	2.32454e-07	-25.7989		Ca1	26867401	26867500	5.83461e-07	15.5038
Ca1	45129551	45129700	1.29077e-12	-31.1818		Ca5	8829651	8829750	6.64556e-11	-39.5935		Ca1	26887501	26887600	2.42159e-08	20.4204
Ca1	45501451	45501600	2.80428e-21	-28.9053		Ca5	9444401	9444550	1.84048e-14	-35.5612		Ca1	26967401	26967550	6.20521e-09	24.022
Ca1	46959351	46959500	3.247e-18	-33.3012		Ca5	9446201	9446350	1.82548e-08	-31.5578		Ca1	28380401	28380500	5.29521e-08	15.2302
Ca1	46968551	46968650	7.59016e-13	-32.9333		Ca5	10058601	10058750	1.38979e-12	-27.1986		Ca1	28535901	28536000	9.18276e-09	17.045
Ca1	47095451	47095550	1.10409e-06	-28.2221		Ca5	10059001	10059100	3.63195e-06	-25.6453		Ca1	29206351	29206450	3.65837e-06	19.7237
Ca1	47432701	47432800	5.37016e-05	-26.9259		Ca5	10916001	10916150	9.52973e-06	-29.909		Ca1	29801001	29801100	2.06036e-10	18.5254
Ca1	47484851	47485000	2.88501e-09	-29.9233		Ca5	12430001	12430150	6.83054e-13	-36.7436		Ca1	30264601	30264750	1.85013e-05	22.5815
Ca1	47707951	47708050	1.19597e-10	-28.5381		Ca5	12430101	12430300	3.6334e-10	-30.2665		Ca1	30696251	30696350	7.14301e-07	15.471
Ca1	47720401	47720550	5.49638e-12	-32.0206		Ca5	12430751	12430900	7.81216e-10	-29.6882		Ca1	30757651	30757750	2.33543e-05	15.7828
Ca1	47917251	47917350	2.63638e-12	-38.4553		Ca5	12430851	12431000	6.48637e-12	-27.2905		Ca1	32283251	32283350	1.16919e-06	15.7576
Ca1	48159701	48159850	5.48972e-10	-42.6282		Ca5	12727351	12727500	1.61696e-13	-40.4828		Ca1	32490801	32490900	1.52486e-06	17.0482
Ca2	986951	987150	3.60314e-15	38.5608		Ca5	12727651	12727750	2.92428e-06	-29.2182		Ca1	32622951	32623100	4.48085e-06	17.6061
Ca2	1565401	1565550	5.82127e-07	26.2313		Ca5	15054751	15054850	2.09257e-06	-27.4432		Ca1	32704251	32704350	3.6626e-06	17.8773
Ca2	1566301	1566400	6.23223e-14	26.6275		Ca5	15503401	15503550	1.01171e-05	-31.8597		Ca1	32944451	32944600	1.61125e-11	27.0995
Ca2	1621151	1621300	1.07311e-18	39.302		Ca5	16036401	16036500	1.66529e-05	-26.59		Ca1	33379601	33379700	4.41056e-08	27.2699
Ca2	1994401	1994550	2.91293e-16	37.581		Ca5	18005001	18005100	1.55222e-10	-33.6601		Ca1	33765201	33765300	2.87311e-06	17.9617
Ca2	2200701	2200800	1.66637e-10	30.4338		Ca5	18150101	18150250	6.37312e-14	-36.9994		Ca1	34358551	34358650	1.07534e-07	32.8632
Ca2	2225201	2225300	4.62342e-05	25.0274		Ca5	18150301	18150450	4.84853e-17	-40.9686		Ca1	34393051	34393150	3.10962e-08	30.765
Ca2	2680651	2680750	1.49011e-06	25.4341		Ca5	18150401	18150550	1.17857e-23	-27.4862		Ca1	34657451	34657550	3.17647e-07	15.2277
Ca2	2695751	2695850	8.51645e-08	28.2486		Ca5	18150501	18150650	3.87188e-26	-37.8873		Ca1	35905501	35905600	3.63987e-11	16.2292
Ca2	2695851	2696000	1.23278e-13	36.0218		Ca5	18150601	18150750	2.23135e-38	-32.8095		Ca1	36999151	36999250	2.36049e-06	16.6305
Ca2	2755551	2755650	6.77769e-14	26.3438		Ca5	18150701	18150850	2.16869e-11	-38.501		Ca1	37084951	37085050	6.82539e-07	15.9624
Ca2	2936451	2936550	1.0635e-19	34.8639		Ca5	18357351	18357450	8.82799e-12	-26.779		Ca1	37678401	37678500	3.10341e-09	24.1809
Ca2	3145501	3145600	7.93941e-13	38.2377		Ca5	26609301	26609450	1.0687e-12	-40.8127		Ca1	38131451	38131550	4.07712e-06	16.2439
Ca2	3663451	3663550	1.01382e-08	33.9726		Ca5	26697051	26697150	3.55091e-06	-30.6534		Ca1	38322951	38323050	1.99333e-06	20.3363
Ca2	3708851	3709000	6.16569e-13	30.9463		Ca5	29895151	29895300	3.45537e-09	-26.8529		Ca1	38515401	38515500	4.56478e-07	18.0292
Ca2	3875101	3875250	3.87139e-13	32.895		Ca5	30064051	30064150	4.49618e-06	-27.7326		Ca1	39564901	39565000	1.86951e-09	28.4107
Ca2	3905201	3905300	4.3919e-13	31.0206		Ca5	30275751	30275900	1.40628e-12	-26.8097		Ca1	39565001	39565100	1.13455e-12	15.6156
Ca2	5376351	5376450	9.19841e-11	36.1309		Ca5	32027301	32027400	6.15732e-07	-26.3043		Ca1	40100351	40100450	3.58159e-06	15.9706
Ca2	5468951	5469050	2.90992e-08	27.2242		Ca5	32027451	32027550	7.52757e-30	-46.2794		Ca1	41049851	41049950	8.27336e-12	25.3117
Ca2	5602701	5602850	7.58528e-26	30.9988		Ca5	34296601	34296750	1.13051e-12	-29.2099		Ca1	41112651	41112750	1.78029e-05	15.0646
Ca2	6398651	6398750	7.01005e-07	27.8947		Ca5	34576701	34576800	2.738e-06	-25.4988		Ca1	41435001	41435100	3.53635e-06	16.4596
Ca2	6911051	6911150	3.00226e-10	32.7922		Ca5	37116001	37116100	1.90329e-12	-30.7744		Ca1	41540901	41541000	1.68903e-06	16.0939
Ca2	7819801	7820000	1.66675e-10	32.3126		Ca5	37472901	37473000	5.12091e-07	-27.4535		Ca1	41754351	41754500	5.47889e-07	22.4897
Ca2	8471301	8471450	3.57142e-06	27.4787		Ca5	42813801	42813950	1.25855e-08	-27.1942		Ca1	41865651	41865750	1.51638e-06	24.1711
Ca2	9194701	9194850	1.07147e-08	33.6078		Ca5	43904651	43904800	3.07836e-21	-30.9416		Ca1	42267801	42267900	4.7824e-06	19.1504
Ca2	9409351	9409500	3.7701e-05	27.1053		Ca5	43904851	43904950	2.04998e-15	-27.0455		Ca1	42671051	42671150	2.44586e-05	15.1293
Ca2	9622451	9622600	3.53251e-17	44.2909		Ca5	44043951	44044100	3.2417e-07	-28.8725		Ca1	43087751	43087850	1.24393e-06	26.3415
Ca2	10023001	10023100	2.68573e-19	30.9417		Ca5	44699801	44699950	3.25346e-06	-26.9586		Ca1	43391801	43391900	1.60522e-05	18.4164
Ca2	10024551	10024700	1.10061e-08	28.7651		Ca5	45167501	45167600	2.41565e-12	-36.817		Ca1	43500251	43500350	1.97159e-06	28.3874
Ca2	10359551	10359700	1.19685e-08	28.1596		Ca5	45902001	45902150	4.63989e-08	-27.0371		Ca1	43629951	43630050	6.97837e-06	22.6706
Ca2	12276551	12276700	1.64079e-14	37.613		Ca5	46167101	46167200	1.89822e-07	-25.3532		Ca1	43733401	43733550	7.68706e-09	19.3554
Ca2	12276751	12276900	9.16529e-10	31.8314		Ca5	48072851	48072950	1.39741e-09	-26.5212		Ca1	44032701	44032800	4.39717e-06	18.4211
Ca2	12528551	12528650	7.10125e-09	34.1358		Ca6	1493201	1493400	3.88403e-11	31.9521		Ca1	44997051	44997150	1.61223e-06	15.2151
Ca2	12865101	12865250	4.84918e-10	37.9439		Ca6	2762951	2763050	1.82763e-05	28.3586		Ca1	45368951	45369050	6.14199e-08	16.906
Ca2	12878051	12878150	3.56686e-13	34.8306		Ca6	8679251	8679350	1.49351e-05	25.0086		Ca1	45500751	45500850	2.86092e-05	16.0691
Ca2	12878251	12878400	9.05068e-12	34.3643		Ca6	14078001	14078150	1.17734e-09	27.523		Ca1	46904601	46904750	2.7101e-05	17.4645
Ca2	13664751	13664850	6.34913e-24	37.9453		Ca6	18044151	18044300	4.06913e-11	34.5512		Ca1	46929051	46929200	4.94442e-07	17.2616
Ca2	14145601	14145700	5.26773e-08	26.6528		Ca6	20860151	20860250	5.68754e-08	34.8201		Ca1	46981151	46981250	5.15049e-11	15.4877
Ca2	14487851	14487950	1.29963e-09	29.2236		Ca6	27159001	27159100	5.05445e-06	27.8493		Ca1	47288501	47288600	7.80902e-07	15.3874
Ca2	14731001	14731100	4.0203e-12	42.0922		Ca6	27766201	27766350	7.48776e-14	30.1033		Ca1	47423101	47423200	1.27515e-05	19.2359
Ca2	15181001	15181100	3.00213e-12	40.7963		Ca6	28887351	28887500	1.37101e-23	36.2378		Ca1	47954451	47954550	1.09623e-05	15.1407
Ca2	15462051	15462150	2.09923e-09	32.0514		Ca6	30115651	30115800	6.19844e-09	37.9041		Ca1	47954701	47954800	1.33727e-06	23.4102
Ca2	15596201	15596300	1.62771e-10	35.7831		Ca6	33489901	33490000	4.34261e-10	37.5401		Ca1	48024751	48024850	2.593e-06	16.8915
Ca2	15700301	15700450	1.56816e-07	30.0404		Ca6	35219701	35219800	9.3493e-10	33.4446		Ca2	255101	255200	8.04516e-08	-22.3344
Ca2	15701901	15702100	1.05129e-08	32.8984		Ca6	36572551	36572650	7.46308e-20	38.2099		Ca2	358651	358750	6.77467e-08	-19.1131
Ca2	15759351	15759450	7.07459e-05	25.2867		Ca6	37432051	37432200	7.02255e-09	33.0563		Ca2	432451	432600	7.06529e-06	-17.6156
Ca2	15981351	15981450	3.88409e-10	30.5164		Ca6	39757001	39757150	1.40417e-06	27.4137		Ca2	984151	984250	3.03845e-07	-16.3025
Ca2	16012551	16012700	1.41932e-09	41.1539		Ca6	40941401	40941500	2.27308e-14	29.0021		Ca2	986801	986900	1.56155e-09	-20.9877
Ca2	16059951	16060100	1.10239e-09	32.2862		Ca6	41741951	41742050	1.05135e-09	25.1427		Ca2	1568701	1568800	1.14141e-10	-19.4717
Ca2	17148551	17148650	1.21247e-07	31.0606		Ca6	48174651	48174750	1.62911e-09	33.4229		Ca2	1652151	1652250	1.28158e-05	-27.0042
Ca2	17619651	17619750	1.06784e-13	37.1193		Ca6	50829601	50829750	1.88067e-11	36.5254		Ca2	2184951	2185050	5.62178e-07	-20.5434
Ca2	18350051	18350150	3.0446e-08	32.1646		Ca6	50829851	50829950	1.06669e-09	29.1322		Ca2	2658401	2658500	2.36781e-07	-19.8569
Ca2	20436901	20437050	4.90502e-18	37.9192		Ca6	51586301	51586400	1.0616e-06	28.8136		Ca2	2811701	2811800	2.11839e-06	-19.252
Ca2	22042351	22042500	3.6443e-08	31.1947		Ca6	52799301	52799400	8.04164e-07	28.3229		Ca2	3281451	3281550	5.89656e-08	-19.2522
Ca2	23080101	23080200	2.50544e-06	25.6448		Ca6	53066401	53066550	1.92574e-15	33.3886		Ca2	3416601	3416750	1.19222e-07	-16.4134
Ca2	23291651	23291750	1.45303e-12	36.6561		Ca6	53081701	53081800	8.00577e-11	38.3484		Ca2	3562501	3562600	2.28579e-05	-28.0844
Ca2	23353801	23353900	5.40182e-11	30.3469		Ca6	53381951	53382050	4.63459e-07	27.5316		Ca2	3652601	3652700	2.41555e-05	-15.2888
Ca2	23753001	23753100	8.06251e-13	25.4194		Ca6	53852451	53852600	3.81995e-18	25.4771		Ca2	3704101	3704250	8.93079e-22	-20.9321
Ca2	23828101	23828250	7.76752e-16	38.1358		Ca6	57926001	57926150	8.37028e-15	33.6487		Ca2	3765751	3765850	3.55611e-06	-19.0538
Ca2	23860251	23860400	3.61484e-15	36.6868		Ca6	897451	897550	1.14424e-08	-25.9276		Ca2	3787851	3787950	5.36872e-07	-15.752
Ca2	24045251	24045350	7.6408e-08	30.7869		Ca6	1977451	1977550	4.88735e-13	-34.9377		Ca2	4048251	4048350	7.32678e-07	-17.1918
Ca2	24090151	24090250	9.01971e-07	26.8173		Ca6	4649101	4649200	1.81798e-11	-36.7105		Ca2	5105351	5105450	8.81726e-07	-19.0486
Ca2	24212301	24212400	4.21809e-07	26.0367		Ca6	8014051	8014150	1.28524e-08	-29.5698		Ca2	5234351	5234450	4.86052e-06	-18.4068
Ca2	24297201	24297350	4.57452e-11	40.0035		Ca6	8835301	8835400	1.06232e-06	-27.2635		Ca2	5634301	5634400	7.82496e-07	-17.0937
Ca2	24297401	24297500	1.03215e-05	29.1725		Ca6	12253951	12254100	1.73289e-13	-27.8346		Ca2	6577801	6577900	2.15288e-06	-25.3092
Ca2	24621751	24621850	3.00482e-09	39.3185		Ca6	14065101	14065250	2.88356e-07	-28.2525		Ca2	6849601	6849750	3.76067e-07	-27.5702
Ca2	25014051	25014150	5.6285e-06	28.5733		Ca6	14065801	14065950	1.91902e-06	-28.6425		Ca2	7584801	7584900	1.41162e-06	-30.4854
Ca2	25229751	25229850	4.33132e-14	30.9136		Ca6	14065901	14066050	5.55165e-12	-34.4455		Ca2	7645451	7645550	1.21786e-05	-21.901
Ca2	25573901	25574000	1.47006e-06	26.3889		Ca6	14780001	14780100	2.12395e-08	-25.7252		Ca2	8022501	8022600	8.94132e-08	-18.0532
Ca2	25574701	25574800	1.1705e-05	26.1374		Ca6	16286651	16286800	4.46391e-10	-34.4947		Ca2	8355151	8355300	3.91366e-10	-23.2196
Ca2	26024851	26024950	7.76974e-13	31.7959		Ca6	18472051	18472200	7.49815e-07	-26.4771		Ca2	8653601	8653700	3.26212e-08	-17.4404
Ca2	26883301	26883400	3.84825e-10	27.9774		Ca6	19308201	19308350	9.41528e-14	-30.3206		Ca2	8736851	8736950	4.18617e-06	-16.4721
Ca2	27378451	27378600	5.35977e-24	53.5139		Ca6	20803051	20803150	1.64729e-07	-27.0299		Ca2	9034201	9034300	8.44973e-07	-16.0397
Ca2	27771001	27771150	1.22137e-10	38.7563		Ca6	22387401	22387550	1.52913e-09	-29.0727		Ca2	9451151	9451250	2.24896e-07	-18.2702
Ca2	27780501	27780650	6.4432e-08	28.2357		Ca6	22398351	22398450	8.03098e-08	-32.8388		Ca2	9494251	9494350	7.45703e-07	-15.7057
Ca2	27966301	27966400	1.18264e-07	36.8516		Ca6	22431051	22431200	8.43695e-16	-42.907		Ca2	9828301	9828400	7.70161e-06	-16.4457
Ca2	28113651	28113750	9.24025e-14	34.6908		Ca6	22431201	22431300	1.38051e-11	-39.9728		Ca2	10250751	10250900	2.48673e-16	-21.4092
Ca2	28340201	28340350	1.95653e-08	34.1441		Ca6	22442001	22442100	4.00123e-07	-27.9445		Ca2	10600301	10600400	1.62911e-09	-33.4229
Ca2	28418001	28418100	5.11919e-12	27.4407		Ca6	25000951	25001050	6.36852e-07	-26.584		Ca2	11571501	11571650	3.18658e-10	-18.0755
Ca2	28601001	28601150	1.41988e-09	36.3964		Ca6	25003601	25003700	6.1384e-10	-36.7714		Ca2	11783751	11783850	9.34407e-06	-21.9397
Ca2	28601151	28601300	4.13582e-13	29.1125		Ca6	26383601	26383700	2.07361e-14	-35.4043		Ca2	11799201	11799300	2.8205e-05	-18.3256
Ca2	28924801	28924900	4.76444e-06	26.5171		Ca6	26383701	26383850	3.16519e-11	-31.9363		Ca2	11907751	11907850	1.61754e-05	-19.235
Ca2	30031251	30031350	2.77174e-07	25.2666		Ca6	27476751	27476850	1.43769e-06	-27.3425		Ca2	12180601	12180700	1.61155e-08	-18.1721
Ca2	30348451	30348600	2.57327e-08	35.6775		Ca6	28176451	28176550	1.19581e-16	-25.6912		Ca2	12182751	12182850	7.3148e-06	-17.7305
Ca2	30581351	30581450	2.91605e-06	25.8207		Ca6	28452751	28452850	2.28115e-18	-28.2209		Ca2	12232601	12232700	3.83602e-06	-17.1893
Ca2	30622451	30622550	7.14989e-15	48.4778		Ca6	30758251	30758350	1.52702e-07	-29.2171		Ca2	13144001	13144100	5.83591e-10	-19.3636
Ca2	30707601	30707700	4.6777e-08	31.6339		Ca6	32403551	32403650	5.94242e-06	-26.345		Ca2	13497601	13497700	4.21278e-08	-26.0011
Ca2	30800251	30800350	3.78275e-09	30.0317		Ca6	32465401	32465550	1.01235e-16	-32.7755		Ca2	13857051	13857150	1.82595e-05	-17.4699
Ca2	31078251	31078350	7.94737e-24	32.2917		Ca6	36696601	36696700	5.19119e-07	-27.218		Ca2	13938651	13938750	4.50604e-06	-19.888
Ca2	31428501	31428650	2.94784e-16	34.9009		Ca6	38352651	38352750	7.43473e-09	-31.397		Ca2	14531451	14531550	6.27486e-06	-22.8497
Ca2	31475601	31475700	1.00955e-07	27.0952		Ca6	39485601	39485750	2.64772e-14	-30.3856		Ca2	14631001	14631100	1.05629e-05	-18.5312
Ca2	32016551	32016650	7.15032e-16	44.5878		Ca6	39486301	39486500	9.00345e-13	-32.4423		Ca2	14864951	14865050	5.48339e-07	-24.736
Ca2	32283451	32283550	3.63428e-08	32.4271		Ca6	39486501	39486650	1.36601e-09	-27.7622		Ca2	16110601	16110700	1.19993e-07	-17.7273
Ca2	32905651	32905750	3.43142e-05	27.7391		Ca6	41708251	41708450	2.69884e-24	-26.5553		Ca2	17064751	17064850	1.25373e-06	-26.7003
Ca2	32912101	32912200	2.57137e-06	31.3527		Ca6	41739201	41739300	1.57253e-06	-25.5575		Ca2	17617351	17617450	1.6131e-05	-19.6623
Ca2	33006901	33007000	3.84619e-08	26.2476		Ca6	41739701	41739800	5.17009e-09	-26.022		Ca2	17683401	17683500	2.7129e-06	-31.1475
Ca2	33201501	33201600	2.44444e-09	29.3046		Ca6	44382251	44382400	5.82708e-16	-36.5537		Ca2	17780901	17781000	3.72631e-07	-15.9361
Ca2	33768351	33768450	2.76314e-09	25.2352		Ca6	44395351	44395450	3.33904e-07	-26.8449		Ca2	18856601	18856700	1.87134e-06	-18.448
Ca2	33782801	33782950	1.24251e-14	33.28		Ca6	44527401	44527500	6.68432e-08	-25.6699		Ca2	22050651	22050800	5.46081e-06	-17.1365
Ca2	34217651	34217800	1.52243e-15	32.4238		Ca6	47985601	47985700	7.01469e-08	-33.7775		Ca2	22758701	22758850	1.20535e-08	-17.5626
Ca2	34634001	34634100	5.94707e-09	33.0705		Ca6	48244601	48244700	3.11846e-11	-31.1314		Ca2	23033201	23033300	6.11636e-07	-19.5192
Ca2	35039551	35039750	8.19308e-07	27.9238		Ca6	49741101	49741200	1.01924e-11	-33.4318		Ca2	23497551	23497700	2.93107e-06	-18.5431
Ca2	35762751	35762900	6.26684e-12	33.459		Ca6	50647501	50647600	1.45645e-08	-27.4751		Ca2	23666201	23666300	1.29496e-07	-16.1898
Ca2	35766401	35766500	3.85947e-05	26.4925		Ca6	50647801	50647950	3.00542e-19	-27.1847		Ca2	24858501	24858600	1.94563e-05	-15.3538
Ca2	35771001	35771100	1.79837e-08	28.0068		Ca6	50650101	50650200	1.75813e-08	-39.1418		Ca2	25164251	25164350	8.72335e-06	-20.1443
Ca2	36038951	36039050	4.82992e-15	37.4486		Ca6	51456851	51456950	1.75731e-11	-45.6707		Ca2	25359351	25359450	7.1641e-10	-15.3191
Ca2	36104201	36104300	3.84136e-14	32.8069		Ca6	55079551	55079650	1.05965e-06	-26.5278		Ca2	25591351	25591450	1.82566e-11	-23.7445
Ca2	36149401	36149500	4.13167e-07	25.9408		Ca6	56056801	56057000	3.30502e-11	-32.13		Ca2	25890601	25890700	5.98608e-07	-26.1483
Ca2	36556501	36556600	9.71769e-08	34.5538		Ca6	56214801	56214900	1.03238e-09	-31.4822		Ca2	25979751	25979850	2.21938e-05	-16.3319
Ca2	49401	49500	2.00448e-25	-29.7742		Ca6	56215001	56215100	3.33612e-09	-30.108		Ca2	26289001	26289100	1.59868e-05	-15.4621
Ca2	323901	324050	5.60534e-06	-27.4261		Ca6	56215251	56215350	3.75091e-07	-25.9298		Ca2	26747401	26747550	4.01764e-13	-21.1467
Ca2	671351	671450	2.17198e-08	-25.2193		Ca6	56217001	56217100	2.95541e-10	-26.2487		Ca2	27222851	27223000	1.00302e-07	-15.7827
Ca2	1366901	1367000	0.000155506	-25.1031		Ca6	56217101	56217250	1.9105e-11	-39.2797		Ca2	27342201	27342300	1.88499e-05	-18.4063
Ca2	1740951	1741050	8.80349e-07	-31.9163		Ca6	56342801	56342900	1.97888e-09	-31.0395		Ca2	27513701	27513800	3.70228e-06	-18.47
Ca2	1808251	1808350	2.59406e-08	-25.641		Ca6	56348651	56348750	2.85057e-06	-25.2385		Ca2	27668901	27669000	1.23335e-05	-15.1903
Ca2	1989151	1989250	6.43126e-12	-31.8992		Ca6	56505051	56505200	3.16524e-34	-26.3459		Ca2	28243601	28243700	6.05755e-06	-17.7449
Ca2	1995601	1995750	8.91205e-18	-40.1806		Ca6	56505151	56505300	2.41481e-29	-28.0827		Ca2	28259051	28259150	5.16553e-07	-21.1572
Ca2	2340251	2340350	1.80809e-08	-31.5746		Ca6	56505251	56505400	1.95281e-75	-30.2661		Ca2	28429251	28429350	3.56754e-06	-15.1892
Ca2	2625501	2625650	2.69335e-05	-27.6985		Ca6	56505451	56505600	5.0442e-34	-34.1386		Ca2	28616051	28616150	2.27629e-06	-15.5841
Ca2	2625601	2625800	5.28447e-10	-35.3641		Ca6	56887551	56887700	5.99822e-09	-30.6741		Ca2	28920901	28921000	1.54343e-06	-19.2517
Ca2	6392051	6392150	1.12972e-06	-25.1363		Ca6	56887901	56888050	3.31189e-16	-38.7083		Ca2	28967801	28967900	2.02657e-06	-18.1986
Ca2	6929001	6929150	3.63111e-14	-49.3855		Ca6	56888201	56888300	2.09439e-08	-31.0962		Ca2	29025201	29025350	9.87878e-07	-17.9849
Ca2	7779051	7779150	4.75042e-09	-40.3735		Ca6	57751201	57751300	5.17569e-10	-32.0599		Ca2	29101801	29101950	2.30057e-05	-24.5981
Ca2	7822501	7822600	1.06969e-07	-28.1639		Ca7	5065851	5065950	1.0991e-09	26.3009		Ca2	29478151	29478250	2.79685e-06	-18.1476
Ca2	8368351	8368450	2.61024e-06	-25.5366		Ca7	8140901	8141000	3.24951e-07	27.2343		Ca2	29750101	29750200	4.84823e-07	-29.5827
Ca2	9087151	9087250	1.46564e-06	-25.8508		Ca7	12184901	12185000	1.15192e-15	31.8257		Ca2	29879151	29879300	4.116e-07	-25.6671
Ca2	9460801	9460900	4.17403e-09	-28.0602		Ca7	13643451	13643600	1.39484e-08	30.4115		Ca2	29965901	29966000	3.68364e-11	-21.0735
Ca2	10326051	10326150	2.12467e-05	-28.5851		Ca7	16768301	16768450	9.46207e-08	32.4625		Ca2	30363301	30363400	1.86743e-05	-23.8546
Ca2	11641401	11641550	1.78972e-22	-39.2419		Ca7	17763351	17763450	9.02141e-07	27.5833		Ca2	31297751	31297850	5.4407e-06	-21.7012
Ca2	12269551	12269700	5.46633e-12	-40.8228		Ca7	18145801	18146000	3.51702e-18	39.4038		Ca2	31598751	31598850	1.03711e-05	-20.4851
Ca2	13994751	13994850	1.72107e-07	-27.724		Ca7	18627801	18627900	7.13013e-08	32.5219		Ca2	31811501	31811600	2.18738e-09	-26.5519
Ca2	15001501	15001700	2.02361e-17	-33.347		Ca7	18925451	18925550	2.49353e-06	30.4193		Ca2	32141451	32141550	2.68617e-06	-15.7239
Ca2	16245951	16246050	5.64602e-06	-26.0652		Ca7	20490751	20490850	5.43523e-08	31.2556		Ca2	32174601	32174700	1.74529e-05	-23.4431
Ca2	16375751	16375850	4.61376e-08	-26.6051		Ca7	20684251	20684400	8.42624e-10	36.6793		Ca2	32859351	32859500	4.98311e-11	-23.101
Ca2	16862651	16862750	3.57363e-06	-27.9906		Ca7	20684451	20684550	1.21756e-09	36.5595		Ca2	32863501	32863650	1.33595e-05	-23.465
Ca2	16979351	16979450	1.22701e-07	-29.5597		Ca7	20689251	20689350	2.23768e-06	27.2078		Ca2	32917251	32917350	1.86144e-06	-18.9149
Ca2	17792901	17793000	2.59555e-05	-27.0349		Ca7	20689351	20689500	1.40352e-07	28.4322		Ca2	33067301	33067400	2.62465e-06	-19.2632
Ca2	17795001	17795100	2.62118e-11	-29.5466		Ca7	25433801	25433900	2.56444e-16	27.2514		Ca2	34607151	34607250	1.30244e-05	-17.4812
Ca2	18457351	18457450	2.64485e-06	-27.7286		Ca7	25607551	25607650	1.87782e-07	36.7564		Ca2	34645901	34646050	7.27581e-09	-16.5712
Ca2	18619551	18619650	1.59519e-07	-28.0718		Ca7	25607651	25607800	2.60916e-21	52.2769		Ca2	34727551	34727650	9.75387e-07	-20.2686
Ca2	19689451	19689550	1.43152e-09	-32.3864		Ca7	26147751	26147900	1.6083e-06	28.3551		Ca2	35127201	35127300	1.16078e-06	-15.2545
Ca2	20118951	20119050	0.000139083	-27.7731		Ca7	27397351	27397500	2.48705e-07	30.4816		Ca2	35748401	35748550	4.30185e-06	-25.5156
Ca2	21509051	21509200	2.56565e-08	-25.832		Ca7	27991601	27991700	3.53907e-15	37.9413		Ca2	403801	403900	3.29941e-06	21.662
Ca2	21621651	21621750	8.83373e-14	-29.3985		Ca7	30780451	30780550	1.15668e-05	29.7129		Ca2	413401	413550	1.05467e-06	17.3419
Ca2	23286501	23286650	2.19845e-08	-33.732		Ca7	34147651	34147800	2.94141e-11	27.2296		Ca2	579651	579750	2.42236e-05	18.3859
Ca2	23961651	23961750	4.63309e-09	-40.6004		Ca7	34157401	34157500	9.8353e-08	27.4884		Ca2	613451	613550	1.54962e-06	17.3412
Ca2	25167851	25168000	3.21121e-10	-28.7514		Ca7	36908751	36908850	7.06311e-08	31.5321		Ca2	1131301	1131400	1.9373e-05	16.3174
Ca2	25228651	25228750	0.000148616	-25.1088		Ca7	37647101	37647200	2.41815e-10	26.6667		Ca2	1203551	1203650	2.84573e-07	15.3319
Ca2	25747601	25747700	2.44707e-08	-32.7967		Ca7	38507101	38507200	3.34779e-05	26.6009		Ca2	1633751	1633850	1.41416e-07	20.2718
Ca2	26375551	26375650	2.65665e-05	-25.5026		Ca7	39077401	39077500	1.39881e-14	40.4177		Ca2	1767251	1767350	8.03204e-07	17.3715
Ca2	27285451	27285600	8.27245e-12	-28.1727		Ca7	39229951	39230050	1.712e-06	32.0539		Ca2	1900851	1900950	2.2972e-07	16.2852
Ca2	27472951	27473050	9.89826e-12	-38.6013		Ca7	40847601	40847700	1.02828e-09	28.6999		Ca2	2186751	2186850	6.75024e-07	15.0252
Ca2	27473101	27473250	9.29087e-15	-40.4598		Ca7	40895751	40895850	3.27384e-06	26.5854		Ca2	2393651	2393750	9.33693e-09	22.4439
Ca2	29492051	29492200	0.000126175	-29.2751		Ca7	44493501	44493600	1.33787e-11	33.2449		Ca2	2447251	2447350	3.53182e-06	22.5926
Ca2	32138951	32139100	4.04306e-09	-28.8105		Ca7	45317701	45317800	4.13127e-06	25.9427		Ca2	2841401	2841550	4.01205e-06	22.0782
Ca2	32485001	32485100	6.69422e-05	-26.1192		Ca7	47599701	47599850	1.69067e-07	28.9171		Ca2	2887101	2887200	1.43277e-07	26.6274
Ca2	32588651	32588750	3.97846e-09	-25.1984		Ca7	47663501	47663600	2.48307e-17	49.009		Ca2	3039051	3039150	2.72242e-05	15.9949
Ca2	32589201	32589300	4.96446e-09	-41.5385		Ca7	47757351	47757450	7.69633e-08	31.376		Ca2	3314051	3314150	1.96339e-07	15.2578
Ca2	34144301	34144450	7.23504e-12	-35.8109		Ca7	142401	142500	5.1397e-06	-27.1744		Ca2	3453451	3453600	4.89327e-06	18.0203
Ca2	34181401	34181500	1.91707e-12	-33.3333		Ca7	801651	801750	1.03315e-07	-26.0991		Ca2	3627001	3627100	3.79631e-07	15.9502
Ca2	34197301	34197450	2.3129e-08	-32.9394		Ca7	801801	801900	5.56317e-06	-25.1386		Ca2	3845751	3845850	1.54304e-11	18.1313
Ca2	34684001	34684100	2.95147e-13	-25.9083		Ca7	3286651	3286800	1.44146e-09	-31.4441		Ca2	3873201	3873300	1.21863e-05	19.9601
Ca2	34735151	34735300	1.32531e-06	-26.9342		Ca7	3613151	3613250	1.28875e-07	-38.2716		Ca2	3946201	3946300	5.64792e-08	17.6497
Ca2	34932001	34932100	9.18682e-08	-37.0891		Ca7	5662101	5662250	2.66456e-07	-29.5635		Ca2	4080851	4080950	1.23372e-08	19.8975
Ca2	35163301	35163450	2.40466e-07	-31.662		Ca7	5757851	5758050	3.23964e-18	-30.3817		Ca2	4144001	4144100	1.18586e-06	16.1428
Ca2	35534101	35534250	1.26418e-08	-33.1571		Ca7	6070851	6070950	1.30994e-06	-34.1332		Ca2	4531801	4531950	2.50555e-08	20.0479
Ca2	35714501	35714600	3.99524e-07	-30.4251		Ca7	8686451	8686550	9.89599e-24	-27.3322		Ca2	4531901	4532050	1.43108e-12	16.8628
Ca2	35765451	35765550	1.42411e-09	-32.7532		Ca7	10608351	10608450	2.35419e-07	-26.8642		Ca2	4687651	4687750	2.40668e-07	16.1479
Ca2	36130051	36130150	1.89119e-14	-28.0162		Ca7	10985301	10985450	1.41896e-10	-29.1604		Ca2	5026651	5026750	5.33088e-06	18.2395
Ca2	36135951	36136100	9.72304e-11	-38.2682		Ca7	13020501	13020600	1.49071e-05	-25.0753		Ca2	5238851	5238950	9.84335e-08	19.2811
Ca2	36277851	36277950	1.65303e-09	-34.876		Ca7	13163551	13163700	1.09763e-16	-37.4197		Ca2	5327051	5327200	8.97975e-13	17.3896
Ca2	36428451	36428550	6.79761e-09	-30.1522		Ca7	14128951	14129100	4.96352e-23	-31.3086		Ca2	5508851	5508950	3.57777e-06	17.6155
Ca3	2670151	2670250	6.54925e-09	27.2423		Ca7	14778651	14778800	6.10724e-13	-32.7078		Ca2	5528001	5528100	1.31835e-06	15.7714
Ca3	4146601	4146700	8.55334e-07	27.9764		Ca7	17083501	17083600	2.98468e-06	-26.6469		Ca2	5635701	5635800	3.25592e-07	20.2314
Ca3	5498101	5498200	1.33027e-05	25.9803		Ca7	19041651	19041750	4.44729e-06	-26.2416		Ca2	6023551	6023650	1.91172e-06	19.1637
Ca3	7995651	7995800	4.96516e-10	29.0138		Ca7	19686851	19686950	8.25925e-09	-36.4965		Ca2	6851701	6851800	7.27385e-07	20.2104
Ca3	8291601	8291700	3.30347e-05	25.4348		Ca7	20051851	20051950	5.15259e-06	-28.5615		Ca2	6983201	6983350	3.85604e-07	21.7142
Ca3	8691751	8691850	3.0143e-10	37.8152		Ca7	22520151	22520250	4.20052e-08	-28.6362		Ca2	7093751	7093850	1.02719e-07	18.7092
Ca3	9711151	9711250	5.36447e-10	40.5321		Ca7	22737901	22738050	1.07924e-07	-26.5086		Ca2	7564151	7564300	1.13753e-05	15.8645
Ca3	10999601	10999700	3.10309e-11	31.8516		Ca7	23142201	23142300	9.00659e-10	-35.4547		Ca2	7725251	7725350	1.98851e-06	20.8032
Ca3	11229101	11229250	3.17393e-13	31.7087		Ca7	23274351	23274550	5.01936e-12	-35.7251		Ca2	7754951	7755050	4.18642e-09	22.1819
Ca3	11674551	11674650	1.61517e-05	28.5391		Ca7	23957351	23957500	4.70062e-06	-26.3179		Ca2	7760751	7760850	6.8434e-06	19.0839
Ca3	12271601	12271750	1.45761e-07	29.799		Ca7	25360001	25360200	5.29227e-07	-25.8903		Ca2	7865101	7865200	3.21018e-07	18.9076
Ca3	14231151	14231250	1.0197e-07	33.6707		Ca7	25383951	25384050	1.64063e-07	-27.273		Ca2	7906751	7906850	2.85554e-05	17.8456
Ca3	14468251	14468350	2.36515e-06	29.103		Ca7	25478351	25478450	1.884e-08	-26.4706		Ca2	8262401	8262500	2.36902e-05	20.3033
Ca3	16597651	16597800	3.19749e-06	26.3818		Ca7	26688801	26688900	3.01597e-07	-25.8355		Ca2	8373201	8373300	1.01674e-05	15.4328
Ca3	17082451	17082550	1.30922e-09	27.3313		Ca7	27287351	27287450	1.49184e-07	-32.1092		Ca2	8388301	8388400	2.36722e-05	16.2497
Ca3	17266451	17266600	2.18161e-12	26.3553		Ca7	28310151	28310250	4.05906e-09	-30.8165		Ca2	8395451	8395550	1.65084e-07	16.5825
Ca3	19117851	19118000	1.83165e-09	29.7271		Ca7	28689501	28689600	5.54508e-06	-27.7295		Ca2	8563701	8563850	5.14912e-07	22.6053
Ca3	19137901	19138000	2.38704e-11	38.4242		Ca7	28712601	28712750	3.30862e-14	-40.8861		Ca2	8693501	8693600	1.39196e-06	16.7492
Ca3	19221701	19221850	3.36077e-09	28.7427		Ca7	28987951	28988100	8.22406e-12	-28.9709		Ca2	8836151	8836300	1.40754e-06	16.3787
Ca3	19827601	19827700	4.26608e-11	37.2806		Ca7	29423901	29424000	1.17972e-17	-41.5406		Ca2	8837901	8838000	1.23048e-06	16.9542
Ca3	20064501	20064600	1.74666e-09	36.6899		Ca7	29548351	29548450	3.12178e-14	-27.1295		Ca2	9212751	9212850	2.36746e-05	18.1883
Ca3	20089401	20089500	3.06699e-08	26.8678		Ca7	32129951	32130050	7.05985e-09	-29.7355		Ca2	9353551	9353650	1.7938e-05	15.0927
Ca3	20643101	20643200	4.10604e-07	36.0536		Ca7	33103651	33103750	1.53796e-10	-27.6881		Ca2	9527601	9527700	2.22154e-06	17.6832
Ca3	20794351	20794450	2.77222e-10	30.6693		Ca7	33103801	33103950	2.67976e-09	-32.6175		Ca2	9805551	9805650	6.19445e-06	18.0205
Ca3	20981001	20981150	6.68871e-07	26.0959		Ca7	35053551	35053700	2.82978e-09	-31.7823		Ca2	9875151	9875250	5.817e-08	19.0847
Ca3	21031351	21031450	6.82628e-07	28.003		Ca7	35054601	35054750	2.89939e-09	-30.3744		Ca2	10159251	10159350	1.63355e-07	20.0628
Ca3	21455301	21455400	9.23196e-08	32.5863		Ca7	35054801	35054900	1.38066e-08	-31.651		Ca2	10310201	10310350	7.28522e-07	19.278
Ca3	21474551	21474650	8.77833e-10	28.8849		Ca7	35054951	35055050	3.1312e-08	-33.2183		Ca2	10575651	10575750	1.97419e-05	21.0806
Ca3	21949651	21949750	1.67864e-10	36.3856		Ca7	35055151	35055250	2.36758e-11	-27.2057		Ca2	11486351	11486450	8.99267e-07	19.9623
Ca3	22218051	22218150	3.67406e-11	25.641		Ca7	35055851	35056000	9.13576e-15	-31.0433		Ca2	11745101	11745200	1.2903e-07	21.1789
Ca3	22429451	22429550	1.2311e-06	32.996		Ca7	36546151	36546250	5.76554e-28	-28.3663		Ca2	12149651	12149750	5.01898e-09	15.1878
Ca3	22519301	22519400	5.14963e-06	26.7134		Ca7	38491451	38491550	5.10103e-08	-26.2353		Ca2	12421701	12421800	2.81356e-07	23.6522
Ca3	22596001	22596150	3.9728e-09	34.7271		Ca7	40633101	40633200	1.70164e-12	-25.4402		Ca2	13500051	13500150	2.96614e-06	15.3495
Ca3	23339251	23339350	1.6664e-16	43.0959		Ca7	42229401	42229500	2.35491e-12	-33.7311		Ca2	13786001	13786150	2.18099e-05	18.7188
Ca3	26008051	26008150	2.86821e-14	38.6004		Ca7	43244251	43244350	1.03403e-05	-26.1623		Ca2	13999601	13999700	2.38965e-06	16.4362
Ca3	26212151	26212250	8.85154e-09	31.1851		Ca7	43583601	43583700	1.18973e-10	-37.2614		Ca2	14292101	14292200	1.31069e-05	15.3179
Ca3	26386451	26386550	1.91939e-12	36.1775		Ca7	43746251	43746350	1.74966e-12	-32.8146		Ca2	14312501	14312600	1.33201e-05	15.4656
Ca3	26880651	26880750	2.80521e-07	28.1401		Ca7	45134651	45134800	9.73791e-06	-28.2774		Ca2	14355801	14355900	1.6263e-06	23.3997
Ca3	27020251	27020350	4.42808e-07	25.1807		Ca7	45312851	45312950	9.19762e-07	-26.4534		Ca2	15072451	15072600	1.90029e-08	16.8815
Ca3	28286801	28286900	1.34571e-07	26.9411		Ca7	46376801	46376900	1.0418e-05	-26.4456		Ca2	15239301	15239400	6.61163e-07	15.3146
Ca3	28501501	28501600	1.61958e-07	25.7481		Ca7	47980651	47980800	1.24376e-07	-26.5353		Ca2	15342401	15342500	8.51837e-08	30.2616
Ca3	29230851	29231000	1.26783e-11	37.8961		Ca7	48466801	48466900	1.73388e-11	-25.6506		Ca2	15415401	15415550	1.38066e-09	15.7907
Ca3	29908251	29908350	3.41206e-07	36.8073		Ca8	1971451	1971600	1.71459e-06	31.4473		Ca2	15700601	15700700	1.95359e-06	18.9465
Ca3	30004001	30004100	1.5928e-12	31.1857		Ca8	6377351	6377500	9.91833e-10	28.8685		Ca2	15838751	15838850	1.97727e-05	16.4749
Ca3	30015651	30015750	1.2947e-22	29.2104		Ca8	6859851	6859950	1.69526e-08	29.6931		Ca2	16246951	16247050	1.07555e-08	23.5465
Ca3	30593251	30593400	1.9191e-22	46.6692		Ca8	8417751	8417850	3.45518e-05	25.3869		Ca2	16326501	16326650	7.61967e-10	24.3589
Ca3	30751501	30751650	6.19832e-10	29.8227		Ca8	10409401	10409500	4.97657e-09	28.7381		Ca2	16551201	16551300	7.24342e-06	17.135
Ca3	30988901	30989000	7.99734e-08	31.6761		Ca8	12120051	12120150	8.2857e-06	29.9867		Ca2	17114201	17114300	1.78562e-05	24.334
Ca3	31484751	31484850	7.07922e-08	28.4558		Ca8	13114201	13114350	1.1581e-12	29.617		Ca2	17766101	17766200	3.02362e-10	16.4443
Ca3	31701851	31701950	2.84907e-10	31.7785		Ca8	15755951	15756100	2.15275e-09	27.891		Ca2	17770351	17770450	1.1757e-05	17.2525
Ca3	32440251	32440400	6.09781e-08	31.1255		Ca8	16413051	16413150	2.35454e-15	27.5534		Ca2	17784951	17785050	1.18946e-05	20.5827
Ca3	32798601	32798700	5.39462e-10	28.6067		Ca8	368251	368400	1.5855e-15	-30.7785		Ca2	18159751	18159850	9.11861e-08	21.5164
Ca3	32973201	32973350	1.1646e-05	25.7104		Ca8	5271051	5271150	2.53542e-10	-26.7857		Ca2	18429601	18429700	2.65782e-05	15.1974
Ca3	33721201	33721300	1.11855e-07	26.1049		Ca8	10956801	10956900	1.37492e-05	-26.5054		Ca2	19266101	19266200	3.68052e-06	17.4365
Ca3	34011651	34011850	4.48871e-05	27.807		Ca8	10957951	10958100	1.32278e-13	-53.8598		Ca2	21060051	21060150	2.8796e-06	18.5071
Ca3	34410001	34410100	6.90114e-15	37.8576		Ca8	11310251	11310350	4.56512e-06	-29.1651		Ca2	22100551	22100650	8.41726e-07	15.7279
Ca3	34577051	34577150	3.89035e-22	41.0981		Ca8	12685951	12686100	7.77733e-09	-30.3127		Ca2	22757901	22758000	5.45441e-06	16.0459
Ca3	34587951	34588050	1.22786e-16	26.8051		Ca8	14956301	14956400	1.14342e-08	-37.7137		Ca2	23414251	23414350	1.59639e-06	17.0317
Ca3	34654101	34654250	5.91638e-13	42.6675		Ca8	15588551	15588650	2.20242e-15	-44.1558		Ca2	23457401	23457500	5.70117e-06	18.0729
Ca3	35029851	35030000	1.6696e-20	32.6457		Ca8	15589851	15589950	4.09182e-06	-27.8105		Ca2	23500151	23500250	1.3447e-06	17.9441
Ca3	35052101	35052250	8.68104e-13	26.8285		Ca8	15590001	15590100	6.4511e-11	-41.8003		Ca2	23866301	23866400	1.14146e-05	20.4765
Ca3	35092601	35092700	1.59477e-08	31.1182		Ca8	15594651	15594800	3.28164e-08	-40.9378		Ca2	24279801	24279900	2.26499e-05	15.0741
Ca3	35187801	35187900	1.69913e-07	32.4544		Ca8	15594751	15594950	2.17429e-13	-35.6012		Ca2	24659001	24659100	9.119e-08	18.4253
Ca3	35330401	35330600	1.36991e-10	41.1409		Ca8	15594951	15595050	1.9418e-06	-32.8446		Ca2	24660251	24660350	2.37334e-06	21.3995
Ca3	35753451	35753550	0.000147641	26.726		Ca8	16420251	16420350	3.84486e-10	-26.7332		Ca2	25009751	25009850	2.90658e-06	18.1064
Ca3	35807401	35807500	1.75072e-10	34.0085								Ca2	25360001	25360100	1.57214e-06	16.3943
Ca3	35910351	35910500	8.33376e-06	35.6737								Ca2	25660601	25660700	3.06457e-09	32.3596
Ca3	36170151	36170250	2.01806e-12	37.1774								Ca2	25997801	25997900	1.1792e-07	16.1094
Ca3	36406351	36406450	1.61403e-15	42.5996								Ca2	26037301	26037400	1.53785e-05	24.4079
Ca3	36409551	36409700	5.33863e-05	28.1616								Ca2	26149651	26149800	1.56748e-06	20.1663
Ca3	36462251	36462350	7.79569e-05	25.0868								Ca2	26270601	26270700	2.54426e-06	28.5256
Ca3	36463001	36463150	2.9589e-09	26.5067								Ca2	26433451	26433600	5.70619e-06	15.5713
Ca3	36544501	36544600	3.19901e-10	37.1522								Ca2	26564301	26564400	1.77996e-06	17.9291
Ca3	37023651	37023850	5.73272e-13	36.562								Ca2	26719651	26719750	5.10977e-07	15.5995
Ca3	37214951	37215050	4.87677e-07	25.589								Ca2	26741701	26741800	1.80681e-05	15.6082
Ca3	37316301	37316400	5.55374e-16	37.5122								Ca2	26776851	26776950	1.60822e-09	15.0149
Ca3	37491251	37491350	1.37048e-12	34.9135								Ca2	27001051	27001150	8.4315e-14	43.2977
Ca3	37571001	37571150	9.66892e-07	28.4719								Ca2	27226901	27227000	1.49636e-05	18.7692
Ca3	37575401	37575500	1.69264e-08	26.6307								Ca2	27550301	27550400	9.23846e-08	16.2069
Ca3	37598201	37598350	2.12478e-16	40.5808								Ca2	27604351	27604450	1.49485e-09	19.2825
Ca3	37636151	37636250	9.05568e-14	35.3116								Ca2	27773151	27773250	8.62035e-08	17.9704
Ca3	37765101	37765200	6.73201e-07	28.6426								Ca2	27773851	27773950	5.64722e-06	22.3032
Ca3	37765201	37765300	6.04579e-09	25.9426								Ca2	27775301	27775400	2.22763e-08	21.9008
Ca3	37765701	37765800	4.70109e-24	28.2737								Ca2	27982951	27983050	2.32373e-05	16.8109
Ca3	37911001	37911100	2.82266e-11	28.6731								Ca2	28007051	28007150	6.66328e-06	17.155
Ca3	38025651	38025800	1.15642e-10	32.8399								Ca2	28123551	28123650	6.77253e-06	19.6391
Ca3	38031801	38031900	9.35877e-06	25.6893								Ca2	28363301	28363400	6.63555e-08	21.0401
Ca3	38217751	38217900	1.06103e-08	36.1251								Ca2	28595151	28595250	2.5709e-05	16.9437
Ca3	38381601	38381700	1.46686e-12	36.9249								Ca2	28644651	28644800	3.06359e-06	22.0478
Ca3	38667301	38667400	3.99331e-07	32.7611								Ca2	28803901	28804000	7.01047e-06	16.0722
Ca3	38893901	38894100	1.35731e-09	35.7188								Ca2	29000051	29000200	1.05046e-10	20.9292
Ca3	39258301	39258400	1.23464e-09	28.8432								Ca2	29118951	29119050	9.2717e-07	24.1049
Ca3	39340601	39340700	3.06267e-15	45.4104								Ca2	29124451	29124550	5.15105e-06	15.3676
Ca3	39397801	39397900	1.68608e-20	43.8299								Ca2	29227851	29227950	1.1696e-05	17.4244
Ca3	39470751	39470850	3.72578e-06	25.368								Ca2	29693401	29693500	5.84477e-09	17.6416
Ca3	39554501	39554650	5.22352e-16	36.0225								Ca2	29762901	29763000	1.6392e-08	17.8333
Ca3	39888501	39888600	4.08816e-08	33.4603								Ca2	30039551	30039650	1.18256e-05	17.2977
Ca3	988351	988450	1.44233e-08	-25.7331								Ca2	30246051	30246150	7.64876e-07	15.4906
Ca3	988501	988650	1.05233e-07	-27.4777								Ca2	30329601	30329700	1.54141e-07	18.4356
Ca3	3191601	3191700	2.46091e-06	-27.9131								Ca2	30447401	30447550	1.22502e-11	28.6857
Ca3	10139751	10139850	3.33891e-13	-33.6353								Ca2	30489101	30489200	1.07814e-10	20.7481
Ca3	12381501	12381650	2.8927e-09	-27.2609								Ca2	30616251	30616350	6.42815e-06	16.0106
Ca3	16953001	16953150	1.90718e-21	-34.7486								Ca2	30709551	30709650	2.66869e-08	17.1772
Ca3	16962951	16963050	3.76906e-09	-25.607								Ca2	30967951	30968100	2.14772e-07	16.2085
Ca3	17346801	17346900	1.98939e-13	-48.449								Ca2	31007951	31008050	9.17826e-10	23.1442
Ca3	19486651	19486750	8.83746e-09	-25.4202								Ca2	31059051	31059150	2.52381e-06	16.4195
Ca3	20678251	20678350	1.50074e-10	-28.3277								Ca2	31445601	31445700	2.73831e-06	19.8065
Ca3	20686551	20686650	1.04152e-05	-32.7018								Ca2	31607801	31607900	3.05508e-07	19.1809
Ca3	21424651	21424850	2.2597e-06	-30.4887								Ca2	31730601	31730700	6.62306e-06	24.0716
Ca3	21424851	21425000	2.8376e-10	-32.796								Ca2	31960401	31960500	7.94882e-08	15.5899
Ca3	21991301	21991450	7.0713e-06	-25.4882								Ca2	32025351	32025500	6.75941e-09	18.8041
Ca3	21995201	21995300	1.92835e-07	-25.4678								Ca2	32103751	32103900	8.88595e-06	17.1373
Ca3	22506201	22506350	9.597e-15	-29.6989								Ca2	32421401	32421500	3.24313e-07	16.0166
Ca3	22574001	22574100	2.47167e-09	-33.715								Ca2	32424051	32424150	1.08622e-05	26.8659
Ca3	23563701	23563850	7.58701e-08	-31.7839								Ca2	32541151	32541250	1.76303e-05	17.9492
Ca3	24083001	24083100	3.88322e-07	-27.6378								Ca2	32737001	32737100	8.97657e-06	17.1686
Ca3	26226651	26226750	3.13213e-10	-33.6111								Ca2	32997551	32997650	1.2012e-07	15.9422
Ca3	27313901	27314050	5.17406e-10	-28.6591								Ca2	33033801	33033950	1.75738e-06	20.7563
Ca3	27314001	27314200	1.39967e-21	-40.2679								Ca2	33298051	33298150	5.33299e-13	19.9005
Ca3	27980801	27980900	1.86109e-06	-29.7774								Ca2	33740101	33740200	1.67787e-05	21.918
Ca3	29057301	29057450	2.63433e-14	-31.8772								Ca2	33934001	33934100	1.25479e-06	16.1651
Ca3	29132151	29132300	1.10647e-09	-29.69								Ca2	33944851	33944950	1.04718e-08	16.5979
Ca3	29153951	29154100	2.65157e-09	-30.8059								Ca2	34141801	34141900	8.01874e-06	17.8385
Ca3	29902601	29902700	2.11513e-11	-25.8936								Ca2	34815701	34815800	3.83738e-07	22.1095
Ca3	29957951	29958050	1.96148e-09	-30.1117								Ca2	34827951	34828100	2.57155e-07	16.4475
Ca3	30411301	30411400	4.13884e-05	-29.4903								Ca2	34846601	34846750	3.14888e-08	18.8624
Ca3	30722651	30722750	1.08827e-05	-30.2651								Ca2	34846801	34846900	7.32966e-07	18.6254
Ca3	30961901	30962000	5.38119e-07	-29.4514								Ca2	34854701	34854800	7.28236e-06	27.9371
Ca3	31593751	31593850	1.96492e-09	-27.5673								Ca2	35067801	35067900	2.55673e-05	27.3292
Ca3	31770201	31770300	2.861e-05	-25.9259								Ca2	35088301	35088400	4.26451e-06	25.9838
Ca3	31931951	31932050	4.49237e-07	-28.0645								Ca2	35459001	35459100	2.1123e-05	16.3332
Ca3	32557801	32557900	1.40889e-05	-26.8191								Ca2	35626651	35626750	6.59975e-11	20.5858
Ca3	33969451	33969550	1.71911e-10	-26.8026								Ca2	35711851	35711950	7.70125e-06	17.5828
Ca3	34885601	34885700	3.96634e-22	-57.3552								Ca2	35761501	35761600	2.32072e-06	19.958
Ca3	34988201	34988300	4.11659e-06	-25.2112								Ca2	35807901	35808000	9.25384e-06	15.4649
Ca3	35830601	35830750	2.83083e-09	-31.0374								Ca2	35962501	35962600	1.46637e-05	17.5649
Ca3	35903151	35903250	5.0796e-10	-30.715								Ca2	36325001	36325100	7.98561e-09	17.2054
Ca3	36002701	36002800	9.54875e-05	-27.1498								Ca2	36552001	36552100	1.98259e-06	25
Ca3	36196351	36196450	2.72204e-12	-25.3382								Ca3	583601	583700	1.92418e-05	-19.3451
Ca3	36256351	36256450	8.51247e-13	-36.9903								Ca3	1311651	1311750	9.25988e-06	-19.3805
Ca3	36319701	36319800	3.08537e-15	-26.933								Ca3	2854151	2854250	8.09074e-06	-19.0103
Ca3	36544651	36544800	2.08382e-09	-38.5025								Ca3	3017551	3017650	2.0257e-05	-17.4589
Ca3	37021951	37022100	5.7803e-16	-45.3147								Ca3	3389351	3389450	4.79755e-06	-21.8419
Ca3	37241251	37241350	5.26852e-07	-26.1292								Ca3	3408101	3408200	1.39087e-05	-22.0596
Ca3	37460901	37461000	1.97573e-16	-52.4203								Ca3	4331501	4331600	2.87126e-05	-25.8142
Ca3	37689051	37689200	1.00114e-06	-27.7091								Ca3	5014951	5015050	1.39657e-05	-17.33
Ca3	37689251	37689400	6.08847e-17	-28.8144								Ca3	5528951	5529050	1.56459e-05	-15.9291
Ca3	37689851	37690000	1.24023e-15	-33.7371								Ca3	5597651	5597800	5.65809e-10	-24.3005
Ca3	37690101	37690200	2.36671e-05	-25.7282								Ca3	6679951	6680050	2.48735e-07	-18.917
Ca3	37911151	37911250	3.14509e-12	-28.1825								Ca3	7041351	7041450	3.56165e-06	-17.914
Ca3	38134051	38134150	2.78286e-07	-27.0052								Ca3	7051051	7051150	1.85365e-05	-16.9673
Ca3	38175651	38175750	6.27596e-08	-34.744								Ca3	7069501	7069600	8.02851e-14	-53.2114
Ca3	38237551	38237650	1.80224e-08	-28.1492								Ca3	8772001	8772100	2.63494e-06	-15.2778
Ca3	38287601	38287700	3.65171e-07	-30.5749								Ca3	9090251	9090350	2.04983e-05	-20.1376
Ca3	39049001	39049150	5.07326e-09	-33.9357								Ca3	10762651	10762800	3.52951e-08	-27.2742
Ca3	39187301	39187400	2.81044e-09	-33.1806								Ca3	11161001	11161100	1.55857e-11	-19.7358
Ca3	39507851	39507950	4.19634e-06	-28.3784								Ca3	11161151	11161250	3.19089e-06	-19.2292
Ca3	39623901	39624000	3.63669e-09	-26.3474								Ca3	11293151	11293250	2.35039e-10	-42.0677
Ca3	39723001	39723100	3.51587e-07	-25.1238								Ca3	12244301	12244450	5.12068e-07	-16.3173
Ca3	39791151	39791250	1.75157e-05	-27.4554								Ca3	12395351	12395450	2.6831e-06	-20.5263
Ca4	150401	150550	2.20598e-05	29.8279								Ca3	12427451	12427600	5.09372e-07	-16.2153
Ca4	150501	150650	2.28831e-15	40.1807								Ca3	12853951	12854050	1.07763e-07	-17.3064
Ca4	178301	178400	8.14004e-11	32.7446								Ca3	13111851	13111950	1.30884e-07	-15.8339
Ca4	181001	181100	0.000149174	25.5806								Ca3	13984651	13984800	2.09021e-11	-19.9796
Ca4	761701	761850	1.76905e-12	40.5463								Ca3	14995551	14995650	1.32567e-07	-17.1304
Ca4	837951	838050	1.18884e-19	31.3605								Ca3	15018251	15018350	2.87355e-05	-25.6988
Ca4	853751	853850	2.60145e-13	40.2774								Ca3	15080351	15080450	4.00466e-06	-20.0714
Ca4	853901	854000	5.58506e-12	42.1295								Ca3	15289601	15289750	6.64683e-09	-18.357
Ca4	895301	895500	2.18418e-09	30.8676								Ca3	15664101	15664200	1.16237e-08	-15.2248
Ca4	922101	922200	8.18386e-06	27.0301								Ca3	16596051	16596150	7.94979e-06	-18.3413
Ca4	1256951	1257100	6.22336e-21	44.3498								Ca3	16751651	16751750	6.33356e-08	-16.1323
Ca4	1349651	1349800	4.61491e-12	28.7771								Ca3	16967901	16968000	1.71707e-05	-16.446
Ca4	1845301	1845400	2.78202e-08	29.8878								Ca3	16968201	16968300	2.65808e-06	-17.5339
Ca4	2132901	2133000	1.47062e-10	36.0715								Ca3	17203651	17203750	8.27365e-06	-19.8963
Ca4	2377001	2377150	1.1969e-10	30.6225								Ca3	17215751	17215850	4.8679e-06	-17.599
Ca4	2377851	2377950	1.91857e-09	30.3215								Ca3	17237501	17237600	2.82871e-05	-18.0358
Ca4	2378001	2378150	9.42526e-14	35.3939								Ca3	17958101	17958200	5.89512e-08	-18.7233
Ca4	2561601	2561700	2.11448e-17	45.7773								Ca3	18090651	18090750	6.16367e-06	-17.9762
Ca4	2978551	2978650	3.7936e-12	30.0883								Ca3	18292101	18292200	3.18547e-06	-19.2483
Ca4	3108351	3108500	5.53534e-06	27.1026								Ca3	18493501	18493600	1.05e-07	-18.0036
Ca4	3110451	3110550	9.36016e-19	43.2545								Ca3	18639151	18639250	9.86211e-06	-17.8899
Ca4	3164101	3164250	5.1577e-10	34.8276								Ca3	18719801	18719900	8.67118e-06	-26.3937
Ca4	3677901	3678050	1.56126e-16	30.6808								Ca3	18749101	18749200	1.37715e-05	-16.7513
Ca4	3885251	3885350	7.84751e-10	39.5652								Ca3	18867301	18867400	2.41592e-07	-20.3799
Ca4	4238451	4238550	5.61507e-14	32.6605								Ca3	19643751	19643850	1.43694e-05	-20.614
Ca4	4246751	4246900	8.05126e-10	25.9952								Ca3	19902301	19902400	1.30755e-05	-25.7885
Ca4	4313701	4313800	3.19904e-13	30.4725								Ca3	19946051	19946200	5.56879e-06	-16.4749
Ca4	4631201	4631300	4.93726e-08	41.4491								Ca3	19992351	19992500	3.50147e-08	-24.015
Ca4	4869601	4869750	1.95856e-23	43.8605								Ca3	20053701	20053850	1.28596e-05	-18.3784
Ca4	4958501	4958600	2.48699e-08	27.4514								Ca3	20478601	20478700	8.6577e-06	-16.1515
Ca4	4963901	4964050	5.32796e-09	36.5844								Ca3	20536551	20536650	7.017e-07	-16.712
Ca4	5263801	5263900	4.88871e-10	31.3214								Ca3	20622001	20622100	4.47806e-06	-20.3676
Ca4	5476101	5476200	1.25081e-06	31.6735								Ca3	20875701	20875800	6.61013e-08	-15.4428
Ca4	6402901	6403000	1.02837e-09	31.9388								Ca3	21142651	21142750	2.07486e-13	-15.7025
Ca4	6735401	6735500	3.69441e-05	25.6308								Ca3	21244401	21244500	2.34587e-10	-15.7424
Ca4	6941651	6941800	3.08956e-08	29.7211								Ca3	21333551	21333650	2.28665e-05	-21.5962
Ca4	6941801	6941900	1.44176e-09	28.3389								Ca3	21816251	21816350	1.96836e-05	-17.9702
Ca4	7879101	7879200	8.59899e-05	25.2674								Ca3	21920501	21920600	6.20009e-08	-22.7644
Ca4	8567551	8567650	2.44412e-06	25.1959								Ca3	22048451	22048550	3.93772e-06	-22.5374
Ca4	8782501	8782600	7.98496e-24	31.1727								Ca3	22103001	22103200	4.62912e-06	-16.4562
Ca4	8792001	8792150	4.29321e-14	35.1637								Ca3	22361901	22362000	2.301e-05	-15.1004
Ca4	8851851	8852000	3.65096e-08	30.2802								Ca3	22686151	22686250	1.32074e-06	-28.4176
Ca4	9320251	9320350	1.13295e-12	41.2547								Ca3	22999501	22999600	7.59839e-09	-15.3854
Ca4	9320651	9320750	6.10782e-09	25.7491								Ca3	23202201	23202300	2.79778e-05	-17.8195
Ca4	9335501	9335650	4.30456e-13	41.6014								Ca3	23478051	23478150	1.40839e-07	-33.3406
Ca4	9975701	9975800	1.1057e-08	26.6215								Ca3	23689701	23689800	4.77777e-06	-15.4827
Ca4	9976951	9977100	4.92705e-18	34.6811								Ca3	23770451	23770550	6.2968e-08	-24.3594
Ca4	10023001	10023100	1.52124e-09	27.0384								Ca3	24029001	24029100	2.823e-05	-16.2243
Ca4	10194451	10194550	1.282e-07	31.7105								Ca3	24134001	24134100	1.42608e-06	-22.2437
Ca4	10365551	10365650	4.3751e-07	28.5084								Ca3	24294451	24294550	1.27367e-06	-17.8802
Ca4	10543801	10543900	3.28083e-09	26.4805								Ca3	24745451	24745600	5.32071e-09	-18.8364
Ca4	10696351	10696500	4.26674e-09	35.1366								Ca3	24848051	24848150	6.71554e-06	-17.1539
Ca4	11771901	11772000	9.5866e-15	31.5777								Ca3	24887201	24887300	4.43221e-06	-15.8444
Ca4	11836801	11836900	5.80078e-33	62.217								Ca3	24987451	24987550	1.51913e-06	-25.2799
Ca4	12447101	12447200	3.82306e-10	28.6525								Ca3	25029001	25029100	1.33541e-06	-16.4428
Ca4	12458601	12458750	1.53604e-08	31.96								Ca3	25152001	25152100	3.26582e-06	-19.0198
Ca4	13227501	13227600	1.36917e-12	29.839								Ca3	25241901	25242000	9.78765e-08	-16.5764
Ca4	13402001	13402150	1.2524e-06	30.8752								Ca3	25737451	25737550	2.46378e-07	-18.8889
Ca4	13752301	13752450	2.43888e-18	44.4634								Ca3	26178201	26178300	1.85093e-07	-19.6421
Ca4	14112401	14112500	2.16089e-12	35.7713								Ca3	26246851	26246950	5.43102e-08	-26.0342
Ca4	14714451	14714550	1.59651e-27	46.2192								Ca3	26934551	26934650	3.27227e-06	-15.3922
Ca4	16144601	16144700	9.49153e-13	41.5764								Ca3	27140551	27140700	1.10935e-06	-18.4884
Ca4	16518801	16518950	2.57937e-18	37.304								Ca3	27901751	27901850	6.61345e-08	-18.5667
Ca4	16531351	16531450	6.73276e-08	29.0175								Ca3	28334851	28334950	8.5672e-08	-17.2493
Ca4	16726751	16726900	3.64237e-24	56.1248								Ca3	28386801	28386900	2.656e-06	-16.9417
Ca4	16877001	16877150	2.13323e-09	26.8398								Ca3	28391401	28391500	1.22407e-05	-25.4486
Ca4	16887101	16887250	3.64591e-13	30.1898								Ca3	29259501	29259600	2.8967e-08	-17.1769
Ca4	17039751	17039850	3.47152e-09	27.2893								Ca3	29692651	29692750	1.23131e-05	-22.9396
Ca4	17378551	17378650	1.90161e-07	25.1692								Ca3	29772301	29772400	2.82973e-06	-19.9952
Ca4	17399551	17399700	1.82683e-12	27.5226								Ca3	29800101	29800200	1.29213e-05	-16.7411
Ca4	17490201	17490300	6.88785e-08	25.3816								Ca3	29850301	29850400	2.33439e-05	-19.8404
Ca4	17588151	17588250	3.48282e-09	27.8904								Ca3	30033901	30034000	1.76856e-05	-20.0926
Ca4	17759951	17760050	4.36842e-09	29.0757								Ca3	30171751	30171850	2.25535e-07	-23.814
Ca4	17785101	17785200	1.19573e-07	26.7327								Ca3	31064501	31064600	9.62227e-17	-26.6907
Ca4	17861951	17862100	2.0287e-29	39.7986								Ca3	31211701	31211800	1.29236e-06	-16.4608
Ca4	17898901	17899000	3.57884e-16	29.7619								Ca3	31982801	31982900	7.03018e-07	-15.475
Ca4	17899051	17899250	5.66294e-10	28.6589								Ca3	32092201	32092300	1.22668e-05	-20.274
Ca4	17950401	17950500	2.62272e-09	34.0835								Ca3	32393901	32394000	1.56488e-06	-20.3825
Ca4	18494301	18494450	2.56655e-11	28.3268								Ca3	32412601	32412700	1.96956e-06	-25.7231
Ca4	19018001	19018100	1.33445e-07	26.339								Ca3	32545351	32545450	4.78215e-06	-15.5104
Ca4	19120751	19120900	8.55811e-14	40.6944								Ca3	33751551	33751650	4.33191e-07	-21.7378
Ca4	19145601	19145700	8.18872e-16	40.4475								Ca3	34713201	34713350	2.84509e-09	-25.1573
Ca4	19156801	19156950	3.62009e-08	35.5825								Ca3	35343201	35343300	7.84464e-06	-30.253
Ca4	19268251	19268350	5.80039e-14	41.518								Ca3	35380401	35380500	1.81112e-05	-17.7394
Ca4	19522651	19522800	4.34119e-18	37.196								Ca3	35500101	35500250	1.81664e-10	-18.5634
Ca4	19705351	19705450	6.59893e-15	37.7622								Ca3	35575651	35575750	1.12916e-05	-18.7787
Ca4	19714351	19714450	3.07214e-06	30.1983								Ca3	35793401	35793500	1.65485e-06	-22.5243
Ca4	19854151	19854250	2.14598e-10	41.8581								Ca3	36237001	36237150	1.14799e-05	-16.7983
Ca4	19981351	19981450	5.93902e-14	27.3272								Ca3	36454951	36455050	1.61181e-08	-21.2309
Ca4	20080551	20080750	6.37135e-17	38.8862								Ca3	36773901	36774000	1.64898e-05	-17.125
Ca4	20081501	20081600	3.98167e-07	26.0758								Ca3	37146551	37146650	8.98993e-09	-20.7517
Ca4	20447451	20447550	1.27782e-06	26.2743								Ca3	37148151	37148250	3.02428e-06	-17.7218
Ca4	21141751	21141850	1.11988e-08	28.231								Ca3	37247001	37247100	2.0896e-06	-19.0385
Ca4	21976601	21976700	2.88295e-08	29.7785								Ca3	37375801	37375950	7.63421e-06	-19.2275
Ca4	22125001	22125150	1.26616e-10	36.8159								Ca3	37548701	37548800	3.74851e-07	-23.8095
Ca4	22238001	22238100	3.99461e-11	34.8751								Ca3	37622601	37622700	1.96456e-06	-19.5515
Ca4	22360701	22360850	1.09029e-15	36.307								Ca3	37966001	37966100	1.06046e-08	-15.1515
Ca4	22402901	22403000	3.05875e-13	35.5701								Ca3	38747551	38747650	1.37577e-05	-15.625
Ca4	22731801	22731900	1.10104e-12	29.072								Ca3	38938551	38938650	1.04205e-05	-15.1148
Ca4	22863051	22863150	9.01244e-09	30.0272								Ca3	39172401	39172500	9.46258e-07	-27.3504
Ca4	22865351	22865450	6.19666e-24	48.1544								Ca3	39335701	39335800	4.64227e-13	-34.6954
Ca4	22912351	22912500	4.44955e-06	26.4595								Ca3	39474001	39474100	1.1089e-06	-16.2695
Ca4	23503601	23503700	1.98806e-09	31.5025								Ca3	39483601	39483700	3.97838e-07	-21.2008
Ca4	23592551	23592650	6.66107e-14	41.3728								Ca3	39908251	39908350	1.94687e-07	-16.155
Ca4	24047951	24048050	3.92896e-11	35.664								Ca3	5451	5550	9.48332e-06	17.0914
Ca4	24592951	24593050	2.39656e-14	41.4033								Ca3	97701	97800	8.52088e-06	17.3037
Ca4	24851801	24851950	4.96463e-14	35.4333								Ca3	150051	150150	1.28237e-11	17.8024
Ca4	25175551	25175700	3.73835e-14	38.163								Ca3	252601	252700	2.10839e-05	16.4737
Ca4	25918701	25918800	2.79618e-14	44.5681								Ca3	374301	374400	1.08425e-05	16.2134
Ca4	26543601	26543750	1.5003e-12	42.1953								Ca3	1309701	1309800	7.99912e-07	17.8457
Ca4	26543701	26543850	3.6983e-61	52.5101								Ca3	1835201	1835300	4.29137e-06	16.4635
Ca4	26543801	26543950	2.47624e-28	48.3728								Ca3	2039451	2039550	1.74064e-05	15.9203
Ca4	26543901	26544100	3.81572e-12	35.4385								Ca3	2097751	2097850	2.72946e-10	21.8602
Ca4	27388051	27388200	7.98559e-11	32.4625								Ca3	2412501	2412600	2.23711e-08	15.5388
Ca4	27626251	27626350	1.64383e-24	36.5842								Ca3	2914151	2914250	2.29008e-06	15.5721
Ca4	27952501	27952700	1.45611e-07	29.6321								Ca3	3272501	3272600	5.50144e-06	23.0885
Ca4	28299201	28299300	7.46951e-13	25.0753								Ca3	3414851	3415000	3.2758e-07	26.1196
Ca4	28375751	28375850	2.43164e-11	45.7357								Ca3	3606751	3606850	2.66979e-05	16.6185
Ca4	28431951	28432100	9.12669e-11	30.4537								Ca3	3613951	3614050	9.93126e-07	31.1445
Ca4	29063251	29063400	6.09687e-14	37.2412								Ca3	3614151	3614250	5.61572e-06	18.7524
Ca4	29066651	29066800	4.26916e-07	32.7704								Ca3	3626651	3626750	1.53885e-05	22.8988
Ca4	29586451	29586600	5.98658e-31	51.896								Ca3	3667451	3667550	8.72159e-06	16.7753
Ca4	30385301	30385450	2.40484e-09	26.5905								Ca3	3901551	3901650	2.4659e-07	22.537
Ca4	30405201	30405300	5.04844e-10	43.0671								Ca3	3922501	3922650	3.16658e-08	18.1701
Ca4	30485851	30485950	1.87596e-08	31.5891								Ca3	4445001	4445100	1.35246e-05	19.3058
Ca4	30486101	30486300	1.27306e-07	27.6141								Ca3	5009401	5009500	2.11469e-05	22.8355
Ca4	30486451	30486600	1.741e-13	41.1456								Ca3	5213951	5214050	4.53526e-06	16.2603
Ca4	30600251	30600400	3.76431e-07	25.9186								Ca3	5225901	5226050	8.70465e-07	16.4322
Ca4	30665801	30665950	1.07564e-07	35.1912								Ca3	5227651	5227750	6.0927e-09	18.0597
Ca4	32130551	32130650	3.46317e-07	28.5996								Ca3	5233501	5233600	1.22623e-07	18.2794
Ca4	33462651	33462800	3.10127e-10	31.8914								Ca3	5233651	5233750	4.08334e-06	21.3589
Ca4	33464501	33464650	2.68225e-15	26.1254								Ca3	5241551	5241650	3.61581e-06	16.3838
Ca4	33580401	33580500	3.06417e-07	33.2234								Ca3	5462851	5462950	7.88977e-08	25.7257
Ca4	35172751	35172850	1.23156e-11	29.3908								Ca3	5570451	5570550	3.2001e-06	17.8026
Ca4	35418701	35418850	8.77444e-12	35.773								Ca3	5725401	5725500	5.87637e-06	15.4491
Ca4	36212251	36212350	2.38222e-12	35.6695								Ca3	5735801	5735900	2.59592e-06	18.4001
Ca4	37163751	37163850	7.35716e-31	48.5725								Ca3	6690251	6690350	1.12303e-06	16.34
Ca4	37365101	37365200	9.15641e-09	36.9369								Ca3	7687951	7688050	1.14035e-06	25.7976
Ca4	37546751	37546850	5.85828e-09	30.9456								Ca3	7688101	7688200	8.279e-07	20.3102
Ca4	37658251	37658400	1.9775e-08	32.1172								Ca3	7946701	7946800	1.78223e-05	20.0521
Ca4	38241001	38241100	3.48058e-05	25.5431								Ca3	8776351	8776500	1.00457e-05	21.1769
Ca4	38302751	38302850	6.11077e-08	35.2329								Ca3	9188201	9188300	1.30697e-06	25.0552
Ca4	38404551	38404650	2.77914e-20	55.0056								Ca3	9230501	9230600	8.77097e-09	18.5526
Ca4	38540551	38540650	2.29756e-07	25.5691								Ca3	9251551	9251650	8.02365e-06	20.1202
Ca4	40061051	40061150	2.77843e-07	34.238								Ca3	9434301	9434400	1.44555e-05	22.2728
Ca4	40108501	40108650	7.41209e-21	37.8261								Ca3	9887551	9887650	2.32042e-05	15.7191
Ca4	40108601	40108750	5.31672e-28	38.9127								Ca3	10308151	10308250	1.37896e-05	17.2216
Ca4	40108801	40109000	1.7155e-07	31.3979								Ca3	10391701	10391800	5.32664e-06	15.0908
Ca4	40149801	40149950	9.48868e-25	43.5849								Ca3	10401201	10401300	1.67509e-05	16.4852
Ca4	40283451	40283550	1.25653e-06	25.8549								Ca3	11554201	11554300	1.53029e-05	15.9232
Ca4	40379201	40379350	1.00713e-08	38.0676								Ca3	11995801	11995900	2.52591e-06	15.2305
Ca4	40392701	40392850	3.83788e-05	25.6481								Ca3	12704751	12704850	4.93311e-07	18.4567
Ca4	41039751	41039900	1.76808e-12	33.4329								Ca3	12984601	12984700	1.40237e-06	18.0849
Ca4	41103251	41103400	1.43759e-05	28.6999								Ca3	13787601	13787700	2.81793e-06	15.1954
Ca4	41289751	41289900	1.20335e-05	27.8822								Ca3	13832451	13832550	2.83266e-05	19.5161
Ca4	41388851	41388950	2.50372e-07	25.4534								Ca3	15198751	15198850	2.3902e-05	16.5621
Ca4	41543501	41543650	9.19263e-10	31.8922								Ca3	15721551	15721650	4.76154e-08	16.6433
Ca4	41842801	41842900	1.08746e-10	33.7395								Ca3	15823101	15823200	1.95864e-05	23.0761
Ca4	41933751	41933850	8.97176e-08	27.2111								Ca3	15874801	15874900	5.46492e-07	15.1607
Ca4	41953001	41953100	1.15625e-13	33.0922								Ca3	16308601	16308750	3.01172e-06	16.0338
Ca4	42161501	42161600	2.28291e-10	36.612								Ca3	16397651	16397800	8.51665e-06	24.2298
Ca4	42421451	42421600	4.1644e-16	44.0502								Ca3	16659251	16659350	1.94928e-06	17.2211
Ca4	42494501	42494600	3.82058e-11	35.4091								Ca3	16694301	16694400	2.35619e-05	23.0035
Ca4	42658701	42658800	1.18618e-17	33.6971								Ca3	16773801	16773900	2.34179e-05	15.9296
Ca4	42822451	42822550	4.83427e-08	27.2065								Ca3	16885451	16885550	8.66228e-06	22.158
Ca4	43208951	43209100	9.10669e-13	36.1971								Ca3	16885651	16885750	4.37664e-06	28.1716
Ca4	43209051	43209200	2.833e-23	44.6634								Ca3	16946551	16946650	5.97146e-07	23.0274
Ca4	43209451	43209550	5.94044e-10	26.069								Ca3	16960151	16960250	2.03713e-05	20.9028
Ca4	43448201	43448350	1.42082e-09	36.2004								Ca3	17066751	17066850	1.00127e-05	17.2257
Ca4	43630301	43630400	4.87646e-06	31.735								Ca3	17225351	17225450	1.87011e-05	15.3522
Ca4	44184501	44184600	6.60656e-11	33.8731								Ca3	18020451	18020550	6.42656e-06	26.8464
Ca4	44298801	44298900	0.000125988	25.2836								Ca3	18225951	18226050	1.31691e-05	21.0607
Ca4	44366351	44366450	5.94828e-22	35.0461								Ca3	18363001	18363100	2.20844e-06	16.9423
Ca4	44476801	44476950	5.74446e-15	39.9366								Ca3	18383201	18383350	1.98881e-11	25.4655
Ca4	44476901	44477050	1.5923e-16	33.9157								Ca3	18425351	18425500	5.65111e-06	17.2705
Ca4	44791851	44791950	5.24764e-07	27.1422								Ca3	18506351	18506450	5.82155e-06	17.585
Ca4	45113251	45113400	3.04912e-09	26.7696								Ca3	18999551	18999650	4.80441e-08	15.0088
Ca4	45460051	45460200	3.67513e-06	28.3507								Ca3	19289951	19290050	8.8576e-10	23.8943
Ca4	45563001	45563150	4.02468e-14	40.0576								Ca3	19306701	19306800	7.58917e-06	16.058
Ca4	46434451	46434550	4.22149e-06	26.6257								Ca3	19398601	19398700	6.12136e-06	23.1713
Ca4	46611951	46612100	4.84134e-16	34.7605								Ca3	19399401	19399500	4.53459e-06	19.8605
Ca4	46612101	46612250	6.41107e-27	49.7401								Ca3	19470051	19470150	1.33464e-08	26.1521
Ca4	46612201	46612350	4.76803e-26	36.5012								Ca3	19657851	19657950	3.42169e-07	26.3872
Ca4	46690451	46690600	2.30053e-06	30.6523								Ca3	19730651	19730750	1.09976e-06	19.8971
Ca4	46762351	46762450	1.00253e-11	37.6667								Ca3	19912851	19912950	5.67516e-07	17.2941
Ca4	46916951	46917100	2.17824e-13	31.9008								Ca3	19948701	19948800	2.84566e-05	23.0976
Ca4	47148651	47148750	4.35916e-08	34.5566								Ca3	20209451	20209550	7.86898e-08	19.1094
Ca4	47210801	47210900	1.52869e-25	46.5243								Ca3	20254951	20255050	1.62993e-05	17.7402
Ca4	47387901	47388000	1.43629e-09	37.6693								Ca3	20255101	20255200	1.22837e-07	24.9767
Ca4	47451701	47451800	1.26928e-09	31.7934								Ca3	20341551	20341650	2.26125e-06	15.5319
Ca4	47608401	47608500	1.85602e-15	32.1912								Ca3	20611601	20611700	7.8713e-07	17.0298
Ca4	48124051	48124200	1.03256e-15	40.081								Ca3	20924401	20924500	9.08473e-07	17.2645
Ca4	48484751	48484900	1.97242e-18	41.5869								Ca3	21143651	21143750	3.93362e-10	27.0779
Ca4	849501	849650	3.80782e-15	-30.1543								Ca3	21170251	21170350	3.28629e-06	15.7338
Ca4	920651	920750	8.93953e-15	-30.1989								Ca3	21424251	21424400	2.60088e-07	17.6929
Ca4	1283801	1283900	2.3034e-08	-27.0561								Ca3	21600951	21601050	6.66276e-07	15.7367
Ca4	1395001	1395100	8.58154e-10	-33.2029								Ca3	21725401	21725500	4.97328e-06	18.5287
Ca4	1443401	1443500	2.15729e-09	-32.0106								Ca3	21757901	21758000	1.1698e-06	17.1281
Ca4	2099751	2099950	5.30639e-08	-38.6643								Ca3	21988251	21988350	6.08586e-07	20.6402
Ca4	2541551	2541650	3.28634e-06	-29.364								Ca3	22333501	22333600	2.178e-05	25.312
Ca4	2562851	2563000	5.86593e-14	-36.2283								Ca3	22401851	22401950	2.32087e-05	15.2741
Ca4	2892451	2892550	1.73194e-09	-27.1082								Ca3	22421001	22421100	1.01527e-05	21.6759
Ca4	3002701	3002800	5.39387e-11	-30.8426								Ca3	22536801	22536900	1.1304e-05	16.983
Ca4	3455851	3455950	8.81357e-09	-29.5918								Ca3	22701301	22701400	4.28457e-07	17.3977
Ca4	3607451	3607550	1.50981e-11	-36.0103								Ca3	23105751	23105900	2.45967e-06	18.8163
Ca4	3608501	3608600	2.07432e-05	-25.298								Ca3	23130551	23130650	1.5748e-05	18.8378
Ca4	3691501	3691650	6.7116e-10	-33.058								Ca3	23158201	23158300	1.14902e-06	23.9172
Ca4	3736851	3736950	1.60812e-09	-25.2024								Ca3	23310401	23310500	4.88219e-07	17.8786
Ca4	3995951	3996050	3.85492e-11	-25.1726								Ca3	23652451	23652550	1.47909e-08	15.3156
Ca4	4106901	4107000	2.33718e-10	-30.9842								Ca3	23685101	23685200	2.19809e-07	18.0971
Ca4	4141651	4141800	4.24747e-17	-38.7264								Ca3	23711251	23711400	1.17835e-07	16.6183
Ca4	5114951	5115150	1.85013e-07	-28.785								Ca3	23762601	23762700	1.48722e-06	17.051
Ca4	5195951	5196050	4.63881e-08	-26.089								Ca3	23848801	23848900	1.87924e-05	17.3508
Ca4	5262851	5263000	8.82371e-10	-36.9885								Ca3	23871501	23871600	5.0003e-09	15.3523
Ca4	5859451	5859550	2.32139e-11	-32.4478								Ca3	23909801	23909900	2.07962e-07	17.0657
Ca4	6361901	6362000	5.20306e-11	-41.049								Ca3	23930601	23930800	4.21361e-07	21.137
Ca4	6390801	6390900	7.76918e-08	-25.4779								Ca3	23959301	23959400	2.12527e-05	21.921
Ca4	6914051	6914150	3.66202e-15	-28.0735								Ca3	23963451	23963550	6.26542e-07	22.6807
Ca4	7571301	7571400	5.67233e-10	-29.6476								Ca3	24211501	24211600	5.38987e-06	19.7066
Ca4	8304101	8304200	5.60387e-05	-27.1642								Ca3	24241101	24241200	7.03639e-11	27.7746
Ca4	8361851	8362000	6.27025e-16	-45.895								Ca3	24387901	24388000	8.91469e-08	16.8247
Ca4	8441301	8441400	9.94237e-05	-26.0716								Ca3	24640851	24640950	1.22721e-05	16.1695
Ca4	8660051	8660150	7.39543e-18	-27.9766								Ca3	24702801	24702900	2.65055e-06	15.3589
Ca4	8735751	8735850	3.35187e-08	-27.3265								Ca3	24953151	24953250	1.77482e-05	20.188
Ca4	9331201	9331350	2.24342e-14	-38.6677								Ca3	25262801	25262900	3.29279e-09	15.0152
Ca4	9524201	9524350	7.00948e-06	-26.7395								Ca3	25300651	25300750	2.02372e-08	21.1304
Ca4	9818801	9818900	8.11997e-08	-26.7101								Ca3	25465401	25465500	2.00489e-10	27.5789
Ca4	10482151	10482250	9.27458e-06	-27.6413								Ca3	25662101	25662200	5.47638e-06	16.6896
Ca4	10482251	10482400	5.75155e-14	-45.1928								Ca3	26123001	26123200	7.51711e-09	19.7444
Ca4	10482401	10482500	2.20059e-16	-44.1964								Ca3	26269951	26270050	1.45224e-05	20.4189
Ca4	10838401	10838500	4.82728e-09	-35.5691								Ca3	26349551	26349650	7.53979e-08	16.468
Ca4	11072251	11072350	1.19517e-10	-38.6937								Ca3	26842051	26842150	1.40681e-05	15.8689
Ca4	11131951	11132050	4.64058e-25	-40.9524								Ca3	26982101	26982200	1.33574e-06	17.4625
Ca4	11516601	11516700	2.38209e-06	-28.6779								Ca3	27017251	27017350	8.10619e-09	17.8076
Ca4	11600701	11600850	7.89331e-05	-28.0451								Ca3	27369951	27370050	2.16404e-08	18.5607
Ca4	11747201	11747300	3.27544e-08	-29.852								Ca3	27433801	27433900	4.21974e-07	16.9346
Ca4	11885151	11885300	5.93077e-10	-32.5607								Ca3	27507801	27507950	6.37237e-07	19.1635
Ca4	11985151	11985250	4.74119e-12	-41.1218								Ca3	27556951	27557050	2.10098e-07	16.6621
Ca4	12163651	12163750	2.4438e-08	-29.5127								Ca3	27602851	27603000	4.93168e-06	26.4958
Ca4	13000451	13000550	3.89104e-05	-26.4064								Ca3	27659201	27659300	4.74814e-07	19.9831
Ca4	13504451	13504600	2.79121e-11	-32.0544								Ca3	27822901	27823050	2.11804e-09	23.9382
Ca4	13551251	13551400	1.36363e-13	-37.303								Ca3	27829401	27829500	5.18531e-06	17.092
Ca4	13687001	13687100	6.44825e-10	-30.2251								Ca3	28075701	28075850	1.69265e-05	19.4983
Ca4	13839451	13839550	1.43652e-09	-28.8933								Ca3	28177801	28177900	3.63967e-06	15.6526
Ca4	14121701	14121800	1.7234e-05	-25.7601								Ca3	28291851	28291950	2.12499e-06	16.187
Ca4	14184051	14184150	2.48086e-07	-34.3506								Ca3	28399901	28400000	1.91232e-06	21.8363
Ca4	14184401	14184500	8.97164e-13	-45.2241								Ca3	28627651	28627750	9.27579e-07	22.2231
Ca4	14908351	14908450	3.51248e-06	-25.0903								Ca3	28875701	28875850	1.25217e-09	26.2172
Ca4	15026451	15026550	2.23713e-07	-27.0321								Ca3	28968251	28968350	2.00699e-06	15.777
Ca4	15218801	15218900	5.84342e-08	-29.3512								Ca3	29474601	29474700	1.03382e-06	23.1108
Ca4	15221301	15221450	5.14866e-13	-33.6904								Ca3	29685651	29685750	4.01018e-06	21.6534
Ca4	15223651	15223800	2.01562e-06	-30.2241								Ca3	29688051	29688200	2.39336e-06	20.6147
Ca4	15230051	15230200	1.11112e-08	-27.5987								Ca3	29931001	29931100	1.27352e-15	20.385
Ca4	15230601	15230750	2.36109e-11	-37.2227								Ca3	30146501	30146600	1.27556e-08	16.2508
Ca4	15439301	15439400	8.02663e-07	-28.0175								Ca3	30730001	30730100	1.37256e-09	23.1355
Ca4	15439451	15439550	1.20699e-08	-34.1355								Ca3	30844851	30844950	2.92265e-05	23.184
Ca4	15857051	15857150	1.73152e-07	-26.8391								Ca3	30941201	30941300	7.93322e-07	15.8581
Ca4	16217151	16217250	1.62089e-11	-42.1634								Ca3	30941301	30941400	7.32191e-06	26.2111
Ca4	16938751	16938850	1.52834e-10	-28.4124								Ca3	30989001	30989100	8.0927e-07	15.3383
Ca4	16974451	16974550	1.90753e-09	-31.5854								Ca3	31055601	31055700	8.63173e-07	18.2625
Ca4	17379251	17379350	3.67966e-11	-33.914								Ca3	31644951	31645050	1.57208e-07	21.1724
Ca4	18215801	18215950	7.40549e-07	-30.7406								Ca3	31706651	31706750	4.99351e-06	16.4643
Ca4	18500251	18500350	5.4459e-10	-35.9314								Ca3	31822601	31822700	1.52373e-14	39.0894
Ca4	18866851	18866950	3.82474e-08	-26.6857								Ca3	31889451	31889600	2.52559e-05	18.782
Ca4	19281101	19281200	4.75568e-08	-33.5778								Ca3	31938201	31938300	2.61025e-05	18.6751
Ca4	19281251	19281450	1.4879e-08	-33.4526								Ca3	32131951	32132100	6.43556e-06	21.8657
Ca4	19283401	19283550	2.43698e-13	-30.4492								Ca3	32418051	32418150	1.64951e-09	21.5306
Ca4	19283651	19283750	2.44979e-07	-28.8316								Ca3	32547401	32547600	2.79418e-10	31.1605
Ca4	19292251	19292350	6.05204e-08	-35.8055								Ca3	32946501	32946600	2.57624e-05	15.0477
Ca4	19705051	19705200	3.96809e-13	-33.1507								Ca3	33011401	33011500	6.72797e-06	16.044
Ca4	20569901	20570000	3.95509e-08	-35.0642								Ca3	33067101	33067200	1.43317e-06	15.9348
Ca4	21186901	21187000	2.0439e-07	-33.883								Ca3	33784651	33784750	1.25963e-06	15.1418
Ca4	21410451	21410550	9.15153e-08	-26.525								Ca3	33891401	33891500	6.90623e-06	28.7945
Ca4	21891501	21891650	1.23837e-08	-29.7636								Ca3	34625851	34625950	2.39593e-05	16.1336
Ca4	22182301	22182400	8.23869e-17	-34.5203								Ca3	34762901	34763050	2.28478e-07	24.4323
Ca4	22707001	22707150	1.70025e-09	-30.8931								Ca3	34960201	34960300	2.91847e-09	17.8887
Ca4	23391751	23391900	3.22902e-13	-30.661								Ca3	34962401	34962500	2.46914e-06	26.7509
Ca4	23556551	23556700	1.2947e-16	-36.0728								Ca3	34966051	34966200	1.29123e-05	18.7334
Ca4	23734851	23734950	4.26427e-09	-30.8946								Ca3	35348201	35348350	1.54836e-05	26.7029
Ca4	24336401	24336500	7.22895e-07	-27.3089								Ca3	35423851	35423950	1.74479e-05	15.4705
Ca4	24976951	24977050	2.66079e-10	-36.314								Ca3	35619051	35619150	5.55191e-06	20.0156
Ca4	25858851	25859050	4.0334e-24	-37.7167								Ca3	35665301	35665400	9.47086e-06	16.7683
Ca4	26392001	26392100	1.29799e-09	-26.2185								Ca3	35705901	35706000	2.34256e-06	20.434
Ca4	28279651	28279800	1.08963e-08	-29.7489								Ca3	35746951	35747100	1.04734e-05	22.5721
Ca4	28938051	28938200	4.05427e-06	-28.1083								Ca3	36164051	36164150	9.23046e-08	30.1259
Ca4	29278151	29278250	3.59466e-09	-34.1604								Ca3	36238351	36238450	5.4117e-06	15.5448
Ca4	30597501	30597600	2.4623e-11	-34.6879								Ca3	36290001	36290100	3.74111e-06	24.1737
Ca4	31875751	31875850	3.06195e-09	-34.0909								Ca3	36403301	36403400	1.17401e-09	16.8865
Ca4	32186901	32187000	2.99507e-14	-37.4363								Ca3	36483051	36483150	1.57761e-05	16.4943
Ca4	32462801	32462950	5.58482e-10	-31.4012								Ca3	36746801	36746900	2.60333e-05	19.865
Ca4	33825751	33825900	5.69187e-08	-30.55								Ca3	36766401	36766500	2.97104e-06	16.0753
Ca4	33878101	33878200	3.28428e-09	-37.5485								Ca3	36908551	36908650	7.54153e-10	18.3393
Ca4	35961551	35961700	4.39467e-08	-28.1652								Ca3	36960401	36960500	2.5979e-05	21.7062
Ca4	35987201	35987350	1.94627e-05	-32.5164								Ca3	37014501	37014650	6.80558e-15	17.7992
Ca4	36626051	36626150	4.79648e-06	-28.7013								Ca3	37025101	37025200	7.66833e-07	25.3205
Ca4	39377001	39377150	1.28567e-07	-25.7841								Ca3	37688601	37688700	4.75244e-10	19.6791
Ca4	39589951	39590100	2.8383e-11	-27.8323								Ca3	37756601	37756700	5.28275e-06	19.3264
Ca4	39661951	39662050	4.44365e-14	-28.7253								Ca3	37837451	37837550	2.72998e-05	15.0136
Ca4	40016801	40016900	2.33524e-12	-36.6695								Ca3	37979201	37979300	2.00696e-07	20.2604
Ca4	40065351	40065450	4.45095e-06	-25.1697								Ca3	37989051	37989250	5.76895e-21	41.5902
Ca4	41963701	41963800	1.41168e-05	-25.7968								Ca3	38065751	38065900	3.88611e-08	27.5307
Ca4	44021001	44021150	4.43281e-21	-43.0151								Ca3	38594751	38594850	7.489e-06	15.9705
Ca4	45094601	45094750	7.7244e-39	-37.3146								Ca3	38926901	38927050	1.62842e-08	21.9283
Ca4	45607351	45607500	2.85631e-09	-33.73								Ca3	39002251	39002350	7.76103e-10	17.0501
Ca4	46601351	46601450	1.34624e-15	-41.9814								Ca3	39174251	39174400	1.25842e-06	32.4829
Ca4	47002751	47002850	7.38169e-09	-25.7419								Ca3	39185401	39185550	8.37955e-14	22.1762
Ca4	47217251	47217350	4.16152e-07	-25.034								Ca3	39564051	39564150	4.88805e-10	25.8752
Ca4	47421351	47421450	1.54188e-05	-27.5527								Ca3	39574001	39574100	1.8928e-07	15.8607
Ca4	47901101	47901200	1.66878e-10	-38.067								Ca3	39578651	39578750	1.48721e-05	21.2698
Ca4	47901551	47901700	2.94451e-09	-31.9018								Ca3	39602001	39602150	1.09003e-16	17.8468
Ca4	48057451	48057550	2.20288e-09	-27.3719								Ca3	39607451	39607650	6.35761e-06	17.0436
Ca4	48122551	48122650	3.67501e-07	-27.2381								Ca3	39805851	39805950	6.39812e-07	18.5034
Ca4	48473251	48473350	5.80144e-11	-30.8725								Ca3	39854601	39854700	1.37246e-06	29.8344
Ca4	48958901	48959050	8.80095e-12	-38.901								Ca3	39942051	39942150	1.18716e-05	16.1758
Ca5	19101	19200	4.9156e-08	34.0962								Ca4	886451	886600	5.85864e-06	-23.5029
Ca5	174251	174350	2.70143e-11	34.8991								Ca4	908251	908350	2.23998e-07	-25.313
Ca5	204651	204750	1.43474e-07	31.9396								Ca4	1511051	1511150	6.89874e-06	-18.859
Ca5	1302001	1302100	4.66493e-11	35.9649								Ca4	1592701	1592800	1.77616e-06	-21.3165
Ca5	2432101	2432200	1.89498e-07	27.838								Ca4	2186601	2186700	3.39863e-08	-22.729
Ca5	2854651	2854750	4.84299e-07	30.3628								Ca4	2277001	2277150	1.063e-10	-26.153
Ca5	3972701	3972900	3.21231e-15	34.9562								Ca4	2878951	2879050	1.5584e-10	-24.3924
Ca5	5110851	5111050	1.41784e-12	42.8861								Ca4	3184351	3184450	9.11498e-06	-23.2664
Ca5	5111101	5111250	2.37485e-09	48.994								Ca4	3685501	3685700	1.50189e-05	-26.0452
Ca5	6443051	6443150	1.39029e-08	34.6712								Ca4	4299151	4299300	5.11201e-15	-22.8393
Ca5	7221501	7221600	1.26873e-06	25.65								Ca4	5143351	5143450	9.81084e-07	-15.9823
Ca5	7768801	7768900	2.06789e-08	36.7132								Ca4	5396201	5396300	3.3057e-06	-15.2115
Ca5	7780101	7780300	2.20697e-18	38.9799								Ca4	5414551	5414650	2.33054e-05	-21.3249
Ca5	7994601	7994700	9.20936e-08	27.8193								Ca4	5472301	5472400	8.41168e-06	-16.3657
Ca5	8459701	8459800	3.25545e-13	27.8246								Ca4	5701501	5701600	2.21834e-05	-18.513
Ca5	8772801	8772900	3.24166e-10	40.1243								Ca4	5824551	5824650	9.2063e-07	-33.7172
Ca5	10247551	10247650	3.28939e-09	37.1998								Ca4	6124901	6125000	2.32538e-05	-21.2131
Ca5	10636551	10636750	6.34561e-12	30.0444								Ca4	6255851	6255950	4.38679e-10	-39.8963
Ca5	11002201	11002350	7.31663e-09	30.1012								Ca4	6317601	6317700	1.89148e-11	-15.9537
Ca5	11764001	11764100	2.33121e-08	29.2929								Ca4	6449001	6449100	5.54138e-06	-15.4129
Ca5	11843251	11843350	9.76368e-07	31.1944								Ca4	6592101	6592250	4.30657e-07	-22.9582
Ca5	12100401	12100550	5.46388e-11	27.5582								Ca4	6662001	6662100	8.23301e-06	-21.072
Ca5	12245251	12245350	4.71252e-11	33.0138								Ca4	6708801	6709000	1.21972e-12	-24.4277
Ca5	12459851	12459950	2.0502e-05	31.8254								Ca4	6746951	6747150	3.57545e-13	-21.6778
Ca5	13313351	13313450	1.02334e-14	38.2064								Ca4	6881101	6881200	5.53546e-06	-26.2842
Ca5	13886951	13887100	2.07791e-07	27.1177								Ca4	7267051	7267150	1.16968e-07	-16.4491
Ca5	14107251	14107350	1.04869e-12	34.6899								Ca4	7636201	7636300	2.21325e-05	-17.5551
Ca5	14260301	14260500	6.59896e-24	37.0416								Ca4	9008651	9008750	1.99577e-07	-20.654
Ca5	15405301	15405400	8.90265e-06	27.1791								Ca4	9026951	9027050	6.40144e-07	-20.6343
Ca5	15555401	15555550	2.32513e-15	34.0814								Ca4	9031251	9031350	1.70627e-06	-23.5799
Ca5	16348651	16348800	1.75214e-12	35.3177								Ca4	9050551	9050650	2.57922e-06	-19.7587
Ca5	16538601	16538700	2.98234e-06	28.784								Ca4	9642001	9642100	7.31471e-06	-19.9034
Ca5	16588201	16588350	1.97055e-16	42.6427								Ca4	9708501	9708600	2.67496e-08	-21.4851
Ca5	16826651	16826750	6.73945e-09	33.582								Ca4	9735901	9736000	2.2406e-05	-19.7302
Ca5	16924151	16924250	8.78456e-12	32.711								Ca4	9950501	9950600	1.11348e-06	-19.4499
Ca5	18071401	18071500	3.61779e-09	26.8629								Ca4	10310551	10310650	4.88056e-10	-21.0376
Ca5	18249951	18250050	6.78994e-09	42.1131								Ca4	10318101	10318200	1.13424e-05	-21.6439
Ca5	18345401	18345550	8.31595e-15	45.4681								Ca4	10508551	10508700	4.07531e-10	-18.6922
Ca5	18353101	18353200	2.32173e-07	26.7233								Ca4	10654351	10654500	9.70931e-09	-25.5505
Ca5	19603601	19603700	1.76398e-12	31.8576								Ca4	10663351	10663500	5.8586e-09	-19.1471
Ca5	19849001	19849100	1.89164e-14	32.517								Ca4	10682151	10682250	5.48499e-06	-24.6078
Ca5	20369951	20370050	1.51929e-13	37.7441								Ca4	10869201	10869300	3.83007e-06	-17.4597
Ca5	20546401	20546500	3.34594e-09	30.701								Ca4	11642401	11642500	6.86065e-06	-18.3575
Ca5	22033801	22033900	1.8025e-11	40.3727								Ca4	11753401	11753500	1.74229e-05	-18.6196
Ca5	22043601	22043700	3.04555e-06	26.2356								Ca4	11937201	11937300	1.30652e-05	-16.4338
Ca5	22166951	22167100	4.43733e-10	34.653								Ca4	11971001	11971150	9.87392e-09	-19.519
Ca5	23045951	23046150	3.36991e-13	36.7598								Ca4	12787651	12787750	2.28058e-05	-15.6805
Ca5	23255701	23255850	1.10364e-10	37.8942								Ca4	12825901	12826000	1.17489e-06	-20.211
Ca5	24305051	24305150	8.28586e-14	52.2727								Ca4	13113351	13113450	3.67366e-07	-15.0634
Ca5	24641451	24641600	1.99763e-16	34.6146								Ca4	13468551	13468650	1.81135e-07	-17.6191
Ca5	24641551	24641700	2.79032e-16	33.6574								Ca4	14071951	14072050	1.91225e-11	-19.237
Ca5	25391151	25391250	1.80354e-09	32.7327								Ca4	14085201	14085300	2.49142e-06	-15.0394
Ca5	25551601	25551750	9.92116e-19	45.1922								Ca4	14489151	14489250	5.65172e-06	-18.987
Ca5	25583101	25583250	5.7166e-08	29.101								Ca4	14558401	14558550	7.65389e-07	-17.2092
Ca5	26418201	26418300	3.24573e-14	27.3827								Ca4	14910101	14910200	8.87266e-06	-26.1546
Ca5	26676501	26676600	8.26484e-17	48.6317								Ca4	15163601	15163700	1.36315e-06	-28.8493
Ca5	26926651	26926800	6.44057e-19	35.8015								Ca4	16878401	16878500	9.96847e-06	-19.1774
Ca5	27275201	27275300	4.70129e-28	57.4109								Ca4	17396651	17396750	8.58393e-17	-15.4027
Ca5	27695451	27695550	1.78069e-08	25.8567								Ca4	17903201	17903300	5.29003e-08	-17.8768
Ca5	27834351	27834450	9.8574e-10	34.7682								Ca4	18059451	18059600	5.60711e-06	-23.8405
Ca5	27872251	27872400	5.89059e-10	31.8147								Ca4	19182601	19182700	7.92212e-06	-15.3069
Ca5	27980101	27980250	1.07295e-10	36.6095								Ca4	19328951	19329050	1.02273e-06	-20.3325
Ca5	28062701	28062800	3.19609e-10	42.5475								Ca4	19425101	19425200	5.65919e-06	-24.8895
Ca5	28184451	28184600	3.37838e-10	32.1754								Ca4	19989301	19989400	9.35636e-08	-18.5385
Ca5	28279051	28279150	1.13329e-09	29.6632								Ca4	19989401	19989500	2.53621e-07	-25.1648
Ca5	28487451	28487600	1.78541e-22	28.8505								Ca4	20136601	20136750	1.21603e-05	-27.1095
Ca5	28592551	28592650	5.30979e-09	42.2459								Ca4	20191701	20191800	3.86912e-08	-18.8815
Ca5	28720701	28720800	4.60061e-07	32.1244								Ca4	20348551	20348650	1.8134e-05	-17.827
Ca5	28761451	28761650	2.20118e-13	28.5953								Ca4	20366251	20366350	1.13335e-05	-15.5972
Ca5	28833951	28834050	7.14345e-11	36.443								Ca4	20812051	20812150	2.93359e-06	-19.1478
Ca5	28965601	28965750	2.66047e-07	29.4993								Ca4	20812751	20812850	2.29602e-05	-15.2778
Ca5	29468401	29468550	7.01079e-12	26.2702								Ca4	21133301	21133450	3.39349e-10	-33.2176
Ca5	29798951	29799050	1.60731e-07	26.4759								Ca4	21324751	21324850	2.42385e-07	-19.8399
Ca5	29813951	29814050	1.03624e-07	27.5287								Ca4	21327101	21327250	1.91479e-08	-22.3616
Ca5	30141851	30141950	2.07678e-22	46.4993								Ca4	21975851	21975950	5.48714e-11	-19.1084
Ca5	30155251	30155350	4.57399e-05	26.8825								Ca4	22025101	22025200	4.91311e-07	-17.8127
Ca5	30180301	30180400	9.73153e-20	43.9736								Ca4	22190351	22190450	2.3363e-06	-16.5584
Ca5	30539401	30539550	3.71999e-19	43.1048								Ca4	22324701	22324800	1.06107e-05	-16.1317
Ca5	30755551	30755650	1.25395e-06	29.0487								Ca4	22342551	22342700	3.31611e-10	-19.9557
Ca5	30946701	30946800	4.64907e-07	27.1064								Ca4	22800951	22801050	3.26179e-08	-15.2365
Ca5	31220001	31220100	7.42936e-11	32.1314								Ca4	23252151	23252250	1.15286e-05	-18.1012
Ca5	31245451	31245600	7.485e-16	42.9896								Ca4	23366151	23366250	8.06442e-06	-20.866
Ca5	31351751	31351850	4.59773e-08	25.8271								Ca4	23576851	23576950	8.04211e-06	-16.8555
Ca5	31450301	31450450	4.67142e-13	32.9794								Ca4	23762301	23762400	3.72635e-08	-17.0284
Ca5	31627251	31627350	2.13939e-13	32.7673								Ca4	24168451	24168600	2.72232e-11	-22.452
Ca5	31831651	31831800	8.06274e-10	38.5489								Ca4	24586601	24586700	1.05789e-06	-17.9612
Ca5	32170651	32170800	0.000123827	25.1003								Ca4	25132451	25132600	2.06608e-05	-16.7946
Ca5	32228251	32228400	5.37672e-12	38.0022								Ca4	25260601	25260700	2.01863e-05	-18.9793
Ca5	32344901	32345000	6.27986e-12	28.8158								Ca4	25515201	25515300	1.09972e-06	-16.4165
Ca5	32438151	32438250	2.64748e-06	27.7788								Ca4	25778051	25778150	1.76481e-05	-16.2039
Ca5	32505051	32505200	2.83267e-10	28.5105								Ca4	26339301	26339400	7.70691e-08	-24.4577
Ca5	32922901	32923050	3.63321e-11	34.5051								Ca4	26472301	26472400	1.90707e-05	-20.5603
Ca5	33108051	33108150	2.42193e-07	28.3615								Ca4	26952301	26952400	1.91968e-06	-21.9761
Ca5	34019951	34020050	6.40794e-20	33.1095								Ca4	26975951	26976050	6.17852e-07	-16.3606
Ca5	34295301	34295400	7.83507e-09	33.2905								Ca4	28031751	28031850	8.93828e-07	-15.8894
Ca5	34730651	34730750	4.0878e-08	26.1701								Ca4	28835301	28835400	2.8145e-05	-15.405
Ca5	34995401	34995500	3.81629e-19	44.2264								Ca4	29046351	29046450	2.04896e-06	-17.6511
Ca5	34997301	34997400	2.99012e-08	27.7991								Ca4	29085651	29085750	1.16984e-05	-23.4764
Ca5	35013051	35013150	1.67052e-08	29.6329								Ca4	29784751	29784850	1.3056e-05	-16.9264
Ca5	35013351	35013450	9.2433e-10	29.281								Ca4	30110101	30110200	7.43088e-07	-17.5501
Ca5	35265601	35265750	3.16547e-13	35.0041								Ca4	30188951	30189050	9.11541e-06	-26.6768
Ca5	35900651	35900750	1.4848e-05	28.3902								Ca4	30369351	30369450	5.66293e-06	-18.479
Ca5	36039301	36039400	1.13831e-10	26.8844								Ca4	30380551	30380650	1.67342e-06	-20.47
Ca5	36858301	36858400	5.00634e-07	25.1011								Ca4	30795451	30795550	7.24172e-06	-15.3126
Ca5	37514601	37514750	1.51377e-07	31.1437								Ca4	31153051	31153200	7.72077e-07	-24.7745
Ca5	37917201	37917350	4.73448e-10	31.7664								Ca4	32156401	32156500	2.80851e-05	-17.3602
Ca5	38072701	38072850	1.0071e-09	30.0491								Ca4	32560151	32560250	2.62949e-06	-22.4677
Ca5	38178601	38178700	4.81816e-05	28.2119								Ca4	32879501	32879600	7.25861e-08	-18.5065
Ca5	38272901	38273000	7.55492e-10	28.0524								Ca4	33571251	33571350	6.39338e-06	-19.7651
Ca5	38293251	38293400	4.81669e-08	30.1036								Ca4	33601801	33601900	8.16091e-07	-20.641
Ca5	38730001	38730150	5.64826e-06	25.7143								Ca4	35041551	35041700	4.57084e-08	-19.1821
Ca5	38804851	38804950	3.38768e-08	29.3151								Ca4	35999901	36000000	1.48604e-05	-15.0572
Ca5	39064901	39065000	3.26959e-07	25.634								Ca4	36033351	36033450	2.01951e-05	-20.8213
Ca5	39326951	39327050	1.3196e-09	29.9788								Ca4	36180251	36180350	1.79022e-11	-37.8101
Ca5	39393501	39393650	1.12095e-22	52.9963								Ca4	36495201	36495300	8.96273e-06	-29.9435
Ca5	39893201	39893350	1.33079e-14	41.6403								Ca4	36578451	36578550	1.79335e-05	-16.1709
Ca5	40307401	40307550	3.44655e-13	34.3129								Ca4	36751251	36751350	1.36478e-08	-15.8006
Ca5	40481951	40482050	1.7542e-08	30.0697								Ca4	36776851	36776950	5.23292e-06	-20.0313
Ca5	40497601	40497700	1.15034e-13	32.0221								Ca4	37402451	37402550	2.61233e-05	-15.8447
Ca5	40590351	40590450	1.6922e-12	35.9353								Ca4	38063351	38063450	5.21808e-06	-17.669
Ca5	40802501	40802600	2.12106e-15	33.6667								Ca4	38174851	38174950	2.37691e-05	-15.9783
Ca5	41118401	41118550	2.80491e-10	35.8742								Ca4	38266951	38267050	1.93711e-06	-15.8151
Ca5	42277951	42278050	1.17231e-09	40.1386								Ca4	38478751	38478850	2.11985e-05	-18.8243
Ca5	42435901	42436000	7.53962e-14	38.1157								Ca4	38545401	38545500	3.75488e-07	-17.8789
Ca5	42562451	42562550	2.28399e-06	25.9199								Ca4	38692151	38692300	1.14117e-08	-25.1739
Ca5	42888101	42888200	1.43546e-06	29.7372								Ca4	38968801	38968900	7.16969e-08	-22.0213
Ca5	43026701	43026800	6.31927e-09	32.0261								Ca4	38997151	38997250	1.36309e-05	-18.8307
Ca5	43068501	43068650	3.22873e-12	40.144								Ca4	38997251	38997400	1.86647e-07	-23.3811
Ca5	43159301	43159450	3.08273e-07	25.7144								Ca4	39135901	39136000	7.80325e-07	-15.2941
Ca5	43177151	43177250	2.57681e-08	33.4088								Ca4	39221101	39221250	1.96626e-06	-18.8697
Ca5	43201251	43201400	7.42665e-09	35.6188								Ca4	39711701	39711800	8.11144e-06	-16.1456
Ca5	43221901	43222000	1.22675e-15	45.6891								Ca4	39999701	39999800	2.2222e-05	-22.629
Ca5	43357351	43357450	1.20563e-06	26.4804								Ca4	40510601	40510700	1.49964e-05	-17.2691
Ca5	43436151	43436250	2.3361e-16	47.566								Ca4	40568001	40568100	2.76454e-06	-15.0139
Ca5	43835551	43835650	3.31093e-08	26.0204								Ca4	40836451	40836550	1.5417e-05	-20.5152
Ca5	44320951	44321050	7.0661e-09	32.1384								Ca4	40998801	40998900	1.62624e-07	-23.51
Ca5	44760901	44761000	1.81534e-11	35.3147								Ca4	41083901	41084000	4.27921e-07	-20.9749
Ca5	44775951	44776050	2.26685e-13	48.874								Ca4	41283901	41284000	1.51562e-07	-19.2526
Ca5	44938651	44938800	7.03061e-13	37.2947								Ca4	41434801	41434900	3.46945e-08	-19.3396
Ca5	44940801	44940900	6.25835e-11	30.4046								Ca4	42046801	42046900	1.46476e-06	-15.2288
Ca5	45390751	45390850	2.8121e-07	27.9722								Ca4	43306651	43306750	7.19054e-06	-15.2413
Ca5	45460501	45460600	4.16733e-08	32.6244								Ca4	43382601	43382700	9.50376e-07	-15.2249
Ca5	45623651	45623750	4.98209e-09	36.446								Ca4	43420451	43420550	5.33259e-06	-15.8657
Ca5	45719251	45719400	2.73671e-16	38.3156								Ca4	43522851	43523000	2.86813e-06	-18.086
Ca5	45952001	45952100	7.84887e-09	26.4914								Ca4	43630751	43630850	9.29446e-07	-22.9479
Ca5	46077301	46077400	2.8411e-07	25.4806								Ca4	43845951	43846050	8.72473e-06	-23.4088
Ca5	46177301	46177400	4.86064e-09	30.0215								Ca4	44195301	44195450	3.1668e-09	-22.3095
Ca5	46185001	46185100	3.12409e-08	28.3421								Ca4	44235351	44235500	5.44377e-07	-18.2162
Ca5	46340651	46340800	9.91641e-05	31.3897								Ca4	44427851	44427950	4.51982e-06	-21.9022
Ca5	46681401	46681500	7.18495e-11	30.9085								Ca4	44508151	44508250	6.38696e-06	-25.0451
Ca5	46723401	46723500	1.64446e-06	26.6826								Ca4	44855101	44855200	1.44909e-09	-17.5786
Ca5	46800301	46800400	9.60788e-09	26.8969								Ca4	45097051	45097150	1.56626e-05	-17.8708
Ca5	46818251	46818400	1.50376e-13	40.8771								Ca4	45310701	45310800	1.73061e-05	-23.7485
Ca5	46962401	46962500	3.46913e-13	25.6332								Ca4	45439251	45439350	1.21174e-05	-18.9788
Ca5	47067301	47067450	2.37598e-10	31.5546								Ca4	45804501	45804600	4.68534e-06	-18.2086
Ca5	47113701	47113800	2.51547e-08	39.3579								Ca4	45885301	45885400	5.06612e-06	-17.0872
Ca5	47199901	47200000	2.05532e-10	31.9798								Ca4	46358051	46358150	5.0142e-08	-19.9281
Ca5	47329901	47330000	4.21104e-10	26.7792								Ca4	47265651	47265750	2.01809e-05	-21.4706
Ca5	47418801	47418900	4.96762e-10	34.7197								Ca4	47459601	47459700	8.43041e-07	-15.3578
Ca5	47517851	47517950	2.03871e-12	42.1948								Ca4	47526951	47527100	4.31125e-06	-22.6925
Ca5	47789101	47789200	2.23235e-14	43.6126								Ca4	47624901	47625000	2.22541e-05	-20.9038
Ca5	47824451	47824600	1.19021e-07	36.8622								Ca4	47737251	47737350	2.92223e-07	-15.5889
Ca5	47827101	47827200	4.99919e-10	38.2375								Ca4	47881801	47881900	2.65843e-05	-20.1389
Ca5	47986501	47986600	1.40169e-22	47.2884								Ca4	49085451	49085550	3.50029e-07	-16.3804
Ca5	48135901	48136000	4.75609e-11	29.6594								Ca4	37351	37450	2.64264e-05	15.4602
Ca5	203051	203200	2.8102e-09	-30.2323								Ca4	211601	211700	3.00492e-06	15.0543
Ca5	850301	850400	1.7239e-15	-43.6379								Ca4	341851	342000	1.64839e-05	16.5516
Ca5	2968151	2968250	3.07552e-06	-26.5591								Ca4	433701	433800	2.71371e-05	16.8489
Ca5	3581101	3581200	5.66637e-08	-31.9108								Ca4	533151	533250	5.06708e-08	24.5037
Ca5	4882301	4882450	9.33762e-11	-28.7888								Ca4	606801	606900	3.11788e-06	18.4858
Ca5	4886751	4886850	4.40994e-14	-32.3524								Ca4	606951	607050	1.59347e-06	22.4489
Ca5	6285401	6285500	1.03082e-11	-32.6954								Ca4	762951	763050	9.10995e-07	24.7134
Ca5	7200701	7200800	2.29599e-08	-41.6643								Ca4	776651	776750	1.71047e-08	23.4015
Ca5	7284351	7284550	3.3239e-08	-29.4104								Ca4	777301	777450	3.63053e-06	19.6151
Ca5	7381801	7382000	2.67941e-07	-28.1959								Ca4	943951	944100	2.77132e-07	23.088
Ca5	7923001	7923150	1.39351e-10	-27.0078								Ca4	1139001	1139100	2.02241e-06	15.2475
Ca5	8756251	8756350	9.35188e-08	-26.4003								Ca4	1164301	1164450	2.6344e-10	24.0113
Ca5	8829251	8829400	1.51343e-11	-33.8035								Ca4	1247201	1247350	1.29548e-09	18.4376
Ca5	8829351	8829500	2.77819e-11	-33.7917								Ca4	1272501	1272600	3.25401e-06	16.9734
Ca5	8829451	8829600	1.20771e-10	-37.5641								Ca4	1581201	1581300	1.12981e-09	17.7834
Ca5	8829551	8829700	4.95188e-11	-41.3556								Ca4	1909351	1909450	2.20576e-06	15.8974
Ca5	8964651	8964800	1.63178e-12	-38.8355								Ca4	1909501	1909600	3.84321e-09	19.2999
Ca5	8964751	8964950	6.37246e-12	-30.1397								Ca4	1961451	1961600	2.64482e-12	22.6043
Ca5	10058601	10058750	9.4465e-08	-26.5112								Ca4	2184951	2185050	1.80805e-05	19.3358
Ca5	10059051	10059150	1.67939e-06	-25.3179								Ca4	2215551	2215650	1.89497e-08	15.6632
Ca5	10689651	10689750	1.64735e-11	-27.5081								Ca4	2552951	2553050	1.39599e-13	18.2772
Ca5	12590501	12590600	6.12363e-20	-25.5399								Ca4	2761751	2761900	6.26162e-10	35.0068
Ca5	12896351	12896500	1.98068e-07	-30.9353								Ca4	2772601	2772700	7.92357e-07	19.9022
Ca5	14714351	14714450	1.01742e-05	-25.6629								Ca4	2882601	2882700	3.93046e-06	15.5344
Ca5	14943751	14943900	2.24685e-09	-32.5067								Ca4	2894251	2894350	2.25051e-07	15.5936
Ca5	15499451	15499550	3.99921e-07	-28.4391								Ca4	2917301	2917400	6.89853e-06	21.1741
Ca5	17224751	17224850	4.27308e-11	-39.895								Ca4	3127851	3127950	7.28095e-06	22.8625
Ca5	18027301	18027450	1.77793e-11	-31.9172								Ca4	3129101	3129200	3.2618e-06	17.4595
Ca5	18027901	18028050	2.11286e-08	-29.322								Ca4	3450751	3450850	3.03395e-06	28.2721
Ca5	19875201	19875350	5.58463e-16	-36.0636								Ca4	3460751	3460850	7.15547e-06	20.0672
Ca5	20577801	20577900	1.61781e-08	-28.655								Ca4	3489301	3489400	3.50467e-09	26.9286
Ca5	21870301	21870400	1.89378e-09	-31.4913								Ca4	3535901	3536000	4.7979e-06	19.44
Ca5	22237501	22237600	7.9886e-10	-34.2994								Ca4	3609601	3609700	1.47375e-09	25.6311
Ca5	23076001	23076100	1.54268e-07	-30.8576								Ca4	3731251	3731350	5.36732e-06	16.5407
Ca5	23315751	23315900	5.82458e-16	-30.202								Ca4	3851151	3851250	4.7264e-07	16.9995
Ca5	23315901	23316050	9.82335e-09	-27.1414								Ca4	4424701	4424800	2.85341e-09	15.5471
Ca5	23626851	23626950	4.54798e-06	-26.0376								Ca4	5106801	5106900	3.04244e-06	22.1498
Ca5	23901251	23901350	2.69574e-07	-28.0514								Ca4	5171701	5171800	2.25504e-05	17.337
Ca5	24152001	24152150	4.05838e-09	-30.6698								Ca4	5260251	5260350	1.17615e-11	20.2102
Ca5	24519151	24519250	5.09073e-06	-30.1849								Ca4	5357701	5357800	2.27593e-05	22.3485
Ca5	24586101	24586200	1.39633e-07	-29.3486								Ca4	5616151	5616250	3.88011e-07	20.5134
Ca5	24716501	24716650	6.96427e-12	-38.0589								Ca4	5723051	5723150	2.8292e-13	29.2214
Ca5	24906801	24906900	2.50624e-12	-28.3935								Ca4	6249551	6249650	2.88632e-06	16.4672
Ca5	25140101	25140200	1.97425e-13	-37.3681								Ca4	6250101	6250200	2.4906e-05	23.1776
Ca5	25473851	25474000	9.22072e-13	-43.992								Ca4	6523001	6523150	3.59254e-10	28.6439
Ca5	25667601	25667700	1.33031e-07	-31.1342								Ca4	6596351	6596450	6.9619e-11	44.0407
Ca5	25736651	25736800	3.64085e-09	-37.3948								Ca4	6698201	6698300	2.06988e-05	17.0148
Ca5	26238501	26238600	9.26985e-09	-25.4682								Ca4	6777751	6777850	2.67798e-05	28.982
Ca5	26418551	26418650	3.70857e-18	-43.5185								Ca4	6783401	6783500	2.53728e-05	17.355
Ca5	26428751	26428900	1.89345e-07	-27.027								Ca4	6822601	6822750	5.3329e-09	22.8969
Ca5	26589551	26589750	5.72674e-08	-27.4033								Ca4	6994951	6995100	1.63025e-11	25.3254
Ca5	27257101	27257200	3.76139e-08	-30.683								Ca4	7016501	7016650	1.91637e-09	31.6117
Ca5	27688201	27688300	3.62869e-06	-28.0897								Ca4	7075051	7075150	1.07986e-07	16.695
Ca5	27891251	27891400	4.04641e-11	-29.1625								Ca4	7427701	7427800	3.85481e-06	16.0656
Ca5	27891901	27892050	1.35944e-09	-28.9621								Ca4	7427851	7427950	2.74832e-07	17.4343
Ca5	28173501	28173600	5.58297e-10	-37.9262								Ca4	7558101	7558200	2.2126e-05	20.3796
Ca5	28353051	28353200	2.76303e-20	-47.1327								Ca4	7579551	7579650	7.95873e-06	16.5603
Ca5	28882351	28882500	1.23764e-05	-26.1417								Ca4	7632001	7632100	1.02914e-05	18.5185
Ca5	28955401	28955500	8.13747e-11	-36.6674								Ca4	7800151	7800250	3.37934e-07	29.1733
Ca5	29511801	29511950	1.27976e-17	-32.9264								Ca4	8054301	8054450	9.04002e-09	23.2465
Ca5	29561451	29561550	3.89757e-06	-31.1133								Ca4	8640101	8640200	2.46371e-05	26.6608
Ca5	29617201	29617350	4.6245e-15	-42.5532								Ca4	8688151	8688300	4.53573e-11	23.7242
Ca5	30031451	30031550	4.14344e-11	-31.282								Ca4	8945351	8945500	1.56885e-05	19.84
Ca5	30074501	30074600	2.29588e-06	-29.2011								Ca4	9026151	9026250	4.15154e-08	16.2114
Ca5	30099901	30100000	1.15897e-14	-46.9493								Ca4	9155901	9156000	1.33102e-09	16.5682
Ca5	30470651	30470800	1.15234e-11	-32.2314								Ca4	9179051	9179200	1.58372e-09	21.9749
Ca5	30488901	30489000	4.70676e-06	-25.0121								Ca4	9185451	9185600	3.81912e-06	15.4374
Ca5	30565201	30565300	7.97698e-11	-26.2004								Ca4	9303901	9304050	1.36342e-12	36.7086
Ca5	30698801	30698900	1.15834e-07	-27.091								Ca4	9304001	9304150	2.035e-15	28.728
Ca5	30799101	30799250	1.50938e-07	-26.913								Ca4	9481001	9481100	1.0599e-05	24.8875
Ca5	31024301	31024400	1.10197e-06	-28.8135								Ca4	9525251	9525350	2.15658e-05	17.8324
Ca5	31265601	31265700	1.84222e-08	-36.6637								Ca4	9573951	9574050	4.01984e-07	16.3198
Ca5	31407901	31408000	1.97224e-09	-31.1008								Ca4	9723851	9724000	2.36245e-06	25.5215
Ca5	31478401	31478500	1.39308e-11	-33.6209								Ca4	9761601	9761750	1.00092e-05	19.7318
Ca5	32177501	32177600	1.63519e-09	-27.613								Ca4	9804601	9804700	2.57296e-05	19.6562
Ca5	32495751	32495850	3.91387e-06	-25.5557								Ca4	9944301	9944450	2.03737e-05	25.0469
Ca5	32978701	32978800	2.02374e-07	-25.5719								Ca4	9979601	9979700	2.57471e-05	15.4311
Ca5	33126451	33126550	1.76015e-09	-33.3641								Ca4	10105301	10105400	1.43567e-07	22.227
Ca5	33382101	33382200	6.86284e-05	-25.5411								Ca4	10180551	10180650	6.47907e-07	16.8742
Ca5	33575101	33575250	2.27584e-07	-29.1477								Ca4	10231651	10231750	1.80379e-05	19.7424
Ca5	33612551	33612650	1.71753e-10	-27.0604								Ca4	10310751	10310850	3.9443e-08	19.8014
Ca5	33944451	33944550	7.74019e-08	-26.3069								Ca4	10379801	10379900	1.05566e-06	18.9176
Ca5	34128651	34128750	8.25353e-08	-25.6541								Ca4	10791201	10791300	2.36035e-05	17.2376
Ca5	34942951	34943050	1.3181e-10	-25.8195								Ca4	10853651	10853800	5.94989e-09	23.8135
Ca5	35039301	35039450	1.56658e-08	-29.0426								Ca4	10918301	10918400	2.85951e-05	26.5484
Ca5	35346051	35346200	1.75383e-10	-34.3778								Ca4	10995201	10995300	5.50757e-08	27.6596
Ca5	35727301	35727400	2.41136e-07	-29.5004								Ca4	11687851	11687950	1.21113e-05	15.9478
Ca5	35865701	35865800	3.07235e-19	-39.4269								Ca4	11786151	11786250	8.67083e-08	16.9889
Ca5	35970851	35970950	5.33234e-09	-32.616								Ca4	11825901	11826000	2.4272e-08	17.9068
Ca5	36092001	36092100	1.03385e-08	-32.0063								Ca4	11863651	11863750	6.00515e-08	15.6332
Ca5	36208901	36209000	1.29207e-07	-25.2147								Ca4	11905751	11905850	3.14269e-06	19.6311
Ca5	36235051	36235150	3.74577e-06	-28.1344								Ca4	11926901	11927050	1.27163e-07	26.59
Ca5	36350651	36350850	5.42996e-06	-29.1115								Ca4	11929601	11929700	3.22313e-07	15.8555
Ca5	36538351	36538450	1.07105e-11	-26.3407								Ca4	11946001	11946150	3.91484e-08	16.5378
Ca5	36550001	36550150	1.1486e-10	-30.4149								Ca4	12332951	12333050	8.47091e-07	16.1993
Ca5	36797601	36797750	3.62027e-10	-29.1154								Ca4	12999701	12999800	1.08136e-08	20.9043
Ca5	36914801	36914900	6.78358e-13	-38.3409								Ca4	13056801	13056900	1.27039e-06	21.517
Ca5	37214051	37214150	7.17458e-09	-30.6587								Ca4	13287901	13288000	1.00186e-10	36.1482
Ca5	37293601	37293750	7.80071e-09	-40.5749								Ca4	13300251	13300350	6.64229e-06	17.674
Ca5	37294251	37294400	4.03713e-12	-45.1319								Ca4	13474451	13474550	1.92092e-05	17.0971
Ca5	37332201	37332300	6.77114e-09	-25.2711								Ca4	13517201	13517300	2.00626e-05	15.0186
Ca5	37732001	37732100	1.42145e-09	-33.6232								Ca4	13825251	13825350	6.10038e-06	23.9128
Ca5	38064551	38064700	3.414e-27	-42.3841								Ca4	13987951	13988050	1.75102e-07	26.0246
Ca5	38262501	38262600	8.93872e-06	-27.8846								Ca4	14043001	14043100	1.59186e-07	18.8123
Ca5	38805651	38805800	1.06791e-17	-31.6232								Ca4	14062551	14062650	1.36014e-10	16.6141
Ca5	38977151	38977250	1.2152e-06	-27.1128								Ca4	14100651	14100750	3.80307e-08	17.6665
Ca5	39006901	39007000	5.97056e-08	-34.5991								Ca4	14130501	14130600	7.23908e-12	15.5941
Ca5	39488151	39488250	2.86786e-09	-26.4286								Ca4	14142351	14142450	4.02109e-06	18.8869
Ca5	40495701	40495800	2.53854e-12	-29.1677								Ca4	14602601	14602800	5.90456e-09	28.3794
Ca5	40562601	40562700	2.82789e-07	-28.1873								Ca4	14767951	14768050	9.70011e-07	17.1908
Ca5	40683151	40683250	3.82256e-15	-42.5501								Ca4	14853201	14853400	4.27733e-06	20.5234
Ca5	40686851	40686950	0.00014932	-25.1659								Ca4	14957701	14957850	3.82232e-06	18.0919
Ca5	40891001	40891100	7.96223e-07	-27.8185								Ca4	14977101	14977200	3.64814e-06	23.7426
Ca5	42169801	42169950	2.44073e-12	-32.4847								Ca4	15051601	15051750	1.14867e-05	21.1719
Ca5	42261251	42261400	3.32007e-08	-29.1977								Ca4	15199701	15199800	1.08249e-06	17.4636
Ca5	42458151	42458250	3.69259e-09	-30.397								Ca4	15200251	15200400	8.71405e-07	17.0053
Ca5	42815151	42815350	3.42831e-15	-43.6442								Ca4	15208151	15208250	1.78294e-05	15.6354
Ca5	42906151	42906250	5.17449e-08	-33.5445								Ca4	15229451	15229550	1.00094e-06	17.8709
Ca5	43506851	43507000	5.11039e-10	-37.7576								Ca4	15439101	15439200	1.8171e-05	15.1785
Ca5	43775401	43775550	3.18498e-09	-31.308								Ca4	15472301	15472400	1.56411e-05	23.8113
Ca5	44023051	44023150	3.59509e-09	-38.9795								Ca4	15486551	15486650	1.81449e-07	21.0631
Ca5	44072301	44072400	1.63407e-13	-33.3757								Ca4	15793851	15793950	4.86608e-06	18.3887
Ca5	44244201	44244300	9.61003e-08	-26.097								Ca4	15877801	15877900	7.00208e-06	15.9452
Ca5	44273351	44273450	4.46551e-11	-29.0278								Ca4	15938801	15938900	3.00157e-06	21.8753
Ca5	44572101	44572250	1.2897e-09	-28.8001								Ca4	15984001	15984100	6.52135e-06	15.9972
Ca5	44674851	44675000	1.41775e-12	-31.8493								Ca4	16085251	16085400	8.18969e-08	25.8708
Ca5	44833001	44833100	2.7394e-06	-25.047								Ca4	16163851	16163950	1.06452e-05	19.3885
Ca5	44938051	44938150	5.05706e-11	-25.023								Ca4	16220551	16220650	9.75214e-08	17.1908
Ca5	44993351	44993500	7.69917e-12	-44.7151								Ca4	16785801	16785900	1.66736e-06	18.8811
Ca5	45269051	45269150	1.35521e-18	-51.1785								Ca4	17394001	17394100	1.15241e-05	28.9363
Ca5	45499601	45499700	1.31354e-07	-28.8555								Ca4	17586001	17586100	9.55401e-06	23.0958
Ca5	45694501	45694650	1.84986e-13	-31.6243								Ca4	17895351	17895450	1.02784e-05	16.4577
Ca5	45807801	45807950	6.04246e-13	-35.6864								Ca4	17959901	17960000	2.61993e-10	19.6855
Ca5	46015201	46015400	9.74067e-18	-31.603								Ca4	18161951	18162100	8.17872e-06	16.5176
Ca5	46567051	46567200	7.02759e-20	-33.3335								Ca4	18201451	18201550	6.64569e-09	21.9027
Ca5	47332101	47332200	8.22435e-12	-38.2808								Ca4	18471551	18471650	3.01799e-08	18.1707
Ca5	47776301	47776400	1.69562e-06	-30.4395								Ca4	18520401	18520500	1.05014e-05	15.2902
Ca6	210601	210700	1.8171e-10	34.5209								Ca4	18572201	18572300	2.54709e-05	18.5027
Ca6	352701	352800	4.33744e-10	28.5186								Ca4	18787051	18787150	2.64502e-05	16.963
Ca6	646451	646550	9.5527e-13	25.8058								Ca4	18908001	18908100	1.54951e-05	17.3786
Ca6	828751	828850	3.71841e-09	30.4054								Ca4	19017751	19017850	1.19131e-05	16.8188
Ca6	1003051	1003250	5.68051e-12	38.1976								Ca4	19046651	19046750	5.54124e-08	15.1111
Ca6	1296101	1296250	8.54383e-17	31.257								Ca4	19118701	19118800	1.83378e-07	16.6851
Ca6	1296251	1296350	2.3357e-16	44.5579								Ca4	19371601	19371700	5.28073e-06	18.7339
Ca6	1321751	1321900	3.52723e-09	38.8054								Ca4	19452801	19452900	2.49318e-06	19.0782
Ca6	1822751	1822850	1.81836e-17	46.8118								Ca4	19600751	19600850	1.94524e-06	16.864
Ca6	2320751	2320850	6.50828e-11	27.4009								Ca4	19854201	19854300	2.72215e-08	15.3727
Ca6	2612151	2612250	1.92427e-14	33.9265								Ca4	20029551	20029700	4.84596e-06	18.171
Ca6	2962101	2962250	8.64818e-12	29.95								Ca4	20142801	20142900	2.71323e-05	18.9144
Ca6	2992351	2992450	1.31313e-07	36.7612								Ca4	20244301	20244450	8.47183e-10	18.2975
Ca6	3471401	3471500	8.73399e-06	25.3759								Ca4	20437401	20437500	3.93057e-08	20.4689
Ca6	3732751	3732850	1.53601e-12	37.4621								Ca4	20714351	20714450	4.12702e-08	15.3693
Ca6	3755801	3755900	2.69637e-10	36.0199								Ca4	20715251	20715400	7.03215e-06	18.6535
Ca6	3842901	3843000	1.16177e-06	25.5573								Ca4	20773801	20773950	1.19773e-07	26.0968
Ca6	4102151	4102250	3.9617e-09	33.3609								Ca4	20922951	20923050	2.8771e-06	19.3309
Ca6	4293001	4293100	7.00553e-06	28.8496								Ca4	20994551	20994650	5.38577e-08	18.1716
Ca6	4302801	4302900	2.58142e-18	38.0713								Ca4	21120901	21121000	2.03027e-06	16.4021
Ca6	4309701	4309800	2.96936e-06	28.3431								Ca4	21158151	21158250	8.53624e-06	16.5017
Ca6	4846251	4846400	2.46436e-09	31.2178								Ca4	21329001	21329100	8.49794e-06	23.8848
Ca6	4898851	4898950	1.77176e-06	26.777								Ca4	21463401	21463550	1.66816e-05	16.7732
Ca6	5040901	5041000	9.54288e-11	33.4332								Ca4	21828201	21828300	3.51841e-07	17.2043
Ca6	5314401	5314500	4.57546e-14	35.7894								Ca4	21891751	21891850	2.85449e-05	18.8934
Ca6	5314551	5314650	5.6424e-19	38.8694								Ca4	22185001	22185100	3.48678e-07	18.1861
Ca6	6127451	6127550	1.72605e-14	30.4874								Ca4	22379451	22379550	4.67728e-07	26.2406
Ca6	6142351	6142500	6.46341e-12	36.8445								Ca4	22706001	22706100	1.33286e-09	16.2458
Ca6	6218451	6218600	1.70783e-09	31.6623								Ca4	22897201	22897300	2.00331e-05	22.2822
Ca6	6220301	6220450	7.07543e-26	35.4207								Ca4	23374751	23374850	9.23728e-06	15.0166
Ca6	6509701	6509800	2.10335e-16	42.4345								Ca4	23726751	23726850	2.24548e-12	16.7209
Ca6	6886151	6886350	2.90889e-08	31.9936								Ca4	24099051	24099150	1.69586e-06	20.8618
Ca6	6886351	6886450	2.43985e-12	30.4737								Ca4	24311951	24312050	1.26452e-08	20.7773
Ca6	6952401	6952500	1.21795e-23	37.0851								Ca4	24442751	24442850	2.7163e-05	19.5613
Ca6	7097151	7097250	1.2204e-09	25.0583								Ca4	26203351	26203450	7.36949e-06	21.0414
Ca6	7208051	7208200	6.21794e-16	52.1946								Ca4	26728551	26728650	2.04231e-06	15.001
Ca6	7213301	7213400	5.15817e-12	33.3692								Ca4	26953051	26953150	1.10831e-07	20.0191
Ca6	7213451	7213550	9.56008e-12	31.5014								Ca4	26955701	26955800	1.67408e-06	19.0553
Ca6	7297901	7298000	1.26774e-06	27.9886								Ca4	27403451	27403550	2.01013e-05	16.6534
Ca6	7430551	7430700	2.39329e-11	33.0591								Ca4	27653851	27653950	2.63221e-05	19.1518
Ca6	7702551	7702700	5.43124e-15	41.9501								Ca4	27746701	27746800	2.07475e-10	22.9217
Ca6	8272601	8272750	8.35249e-08	30.2166								Ca4	28022101	28022200	2.09678e-05	16.5527
Ca6	8570751	8570850	5.64731e-20	26.4944								Ca4	28088901	28089050	1.70536e-05	23.2257
Ca6	8589251	8589350	5.80565e-08	31.9979								Ca4	28297551	28297650	4.84206e-08	21.3099
Ca6	8635451	8635600	9.61725e-11	32.3356								Ca4	28784051	28784150	1.24432e-06	17.2589
Ca6	8655301	8655400	1.16816e-16	29.0877								Ca4	30073251	30073350	2.12614e-06	22.0914
Ca6	8799051	8799150	5.4775e-06	25.1167								Ca4	30267301	30267400	5.2018e-06	18.1166
Ca6	9053951	9054050	6.14216e-20	36.808								Ca4	30794251	30794400	3.02952e-06	19.6473
Ca6	9408901	9409050	3.99584e-06	30.4644								Ca4	31665751	31665850	3.72122e-06	23.7405
Ca6	9553451	9553600	1.32552e-14	33.7977								Ca4	31666051	31666150	1.03096e-06	16.3254
Ca6	9571801	9571950	5.60711e-13	33.0959								Ca4	31834751	31834850	1.05461e-07	18.094
Ca6	9576451	9576600	5.00233e-11	35.9816								Ca4	31894001	31894100	2.40394e-07	15.7895
Ca6	9627251	9627400	9.47864e-11	29.2383								Ca4	31923951	31924050	1.42428e-06	15.7532
Ca6	9743201	9743300	3.00471e-11	35.6984								Ca4	32463601	32463700	6.36875e-06	22.4092
Ca6	9837451	9837550	3.62196e-08	25.4464								Ca4	32556401	32556500	7.1976e-08	24.8848
Ca6	10027001	10027100	1.82269e-09	25.3774								Ca4	32840201	32840300	4.8094e-06	21.7033
Ca6	10138851	10139050	9.15521e-12	29.3165								Ca4	33897401	33897500	2.06376e-07	15.9278
Ca6	10574501	10574600	2.95763e-10	27.4189								Ca4	34272101	34272200	8.45798e-08	16.2998
Ca6	11143601	11143750	3.27478e-11	41.9747								Ca4	34392551	34392650	3.58927e-06	18.8405
Ca6	11172251	11172350	1.59471e-10	34.2533								Ca4	34516651	34516750	4.05408e-06	20.3049
Ca6	11353651	11353800	4.02427e-18	48.2019								Ca4	34777901	34778000	1.0952e-05	17.3365
Ca6	11657001	11657100	5.9523e-08	32.7981								Ca4	35037151	35037250	1.59414e-07	15.2254
Ca6	12890101	12890200	7.1543e-08	31.3354								Ca4	35140801	35141000	1.72099e-17	19.0168
Ca6	13188051	13188200	1.29306e-13	35.9509								Ca4	35144901	35145000	5.29885e-06	17.2715
Ca6	13297351	13297500	1.73224e-11	35.2491								Ca4	35238451	35238550	1.11896e-10	23.4183
Ca6	13300651	13300800	2.33287e-08	28.1439								Ca4	35385151	35385250	1.02728e-05	25
Ca6	13306101	13306250	7.54284e-09	30.6113								Ca4	35503351	35503500	1.96001e-12	23.1224
Ca6	13590551	13590650	1.52959e-07	28.2468								Ca4	35719301	35719400	2.34947e-07	17.2587
Ca6	13711401	13711500	7.14556e-14	39.7598								Ca4	36012901	36013050	2.65982e-11	16.7479
Ca6	13775701	13775800	6.6153e-10	36.0417								Ca4	36148451	36148550	4.21947e-07	20.026
Ca6	14257501	14257600	3.35362e-09	32.1828								Ca4	36246051	36246150	1.95755e-05	21.8034
Ca6	14759901	14760050	3.16353e-07	26.6753								Ca4	36501151	36501250	1.15519e-05	19.7233
Ca6	16146951	16147100	5.59649e-11	36.3051								Ca4	36632201	36632300	2.66014e-05	19.8335
Ca6	16195701	16195800	1.50882e-06	29.7221								Ca4	36811251	36811350	1.14293e-06	21.3705
Ca6	16365151	16365350	3.24122e-09	31.2834								Ca4	36822001	36822100	9.29076e-07	17.1175
Ca6	16367601	16367750	4.53265e-07	32.7936								Ca4	36946251	36946350	3.06826e-06	15.274
Ca6	16771601	16771750	1.28545e-17	41.2717								Ca4	36986301	36986400	1.49678e-05	26.9797
Ca6	17698651	17698750	1.29447e-15	38.0938								Ca4	37267051	37267150	6.70951e-06	17.0297
Ca6	17914751	17914850	2.16656e-11	31.5844								Ca4	37352351	37352500	1.59018e-10	30.0986
Ca6	17915001	17915100	1.62258e-15	26.3679								Ca4	37442151	37442300	2.94854e-10	28.7694
Ca6	18267851	18268000	6.95421e-18	55.0945								Ca4	37480101	37480200	1.79174e-06	16.9632
Ca6	18507151	18507250	6.73302e-08	26.6937								Ca4	37605601	37605700	3.155e-07	23.212
Ca6	18966351	18966450	4.247e-05	25.6494								Ca4	37731151	37731250	3.67399e-07	15.3044
Ca6	19005601	19005700	1.4214e-13	32.4153								Ca4	37876751	37876850	7.03528e-08	17.3252
Ca6	19842051	19842200	1.02323e-11	33.413								Ca4	38192401	38192500	3.36915e-07	17.15
Ca6	20614001	20614150	2.61092e-21	34.4514								Ca4	38203651	38203750	8.78447e-07	16.3117
Ca6	20614101	20614250	1.7103e-12	37.2829								Ca4	38284751	38284850	1.79007e-05	18.0125
Ca6	20756351	20756550	2.4558e-15	37.5406								Ca4	38311801	38311900	1.60504e-05	16.0324
Ca6	20770301	20770450	1.3294e-09	34.3545								Ca4	38325551	38325650	9.60322e-08	22.3109
Ca6	20780501	20780600	5.30457e-09	34.662								Ca4	38487201	38487300	1.66416e-06	15.6176
Ca6	20844801	20844950	5.66886e-09	27.3334								Ca4	38567401	38567500	1.92189e-06	18.0246
Ca6	21005901	21006000	6.46491e-10	38.3834								Ca4	38603901	38604000	3.27175e-06	22.9153
Ca6	21583501	21583600	2.72956e-09	30.7555								Ca4	38647551	38647650	3.07938e-08	15.4135
Ca6	21648401	21648500	2.03067e-10	34.4112								Ca4	38655001	38655100	8.86656e-08	15.6389
Ca6	21870751	21870850	8.82487e-15	28.7956								Ca4	38707851	38708000	2.58328e-07	17.0315
Ca6	22021051	22021150	9.59232e-20	49.3243								Ca4	38716801	38716900	1.2289e-06	15.9088
Ca6	22283401	22283500	3.9291e-20	41.0632								Ca4	38808451	38808550	3.32032e-06	16.5693
Ca6	23025251	23025350	3.20492e-12	39.3433								Ca4	38877201	38877300	3.81502e-06	16.2559
Ca6	23247301	23247400	1.88973e-10	40.017								Ca4	39260801	39260900	3.40611e-06	15.9625
Ca6	24020651	24020750	7.52789e-17	32.2346								Ca4	39899401	39899500	4.2028e-07	17.0426
Ca6	24050351	24050450	4.14564e-12	33.0628								Ca4	40075401	40075500	1.44194e-05	16.6972
Ca6	24089301	24089400	2.22783e-12	36.9986								Ca4	40226801	40226900	1.89535e-05	17.0536
Ca6	24347851	24347950	1.11742e-20	52.2876								Ca4	40463551	40463650	4.39734e-06	16.2255
Ca6	24726301	24726400	7.72479e-07	27.5916								Ca4	40629351	40629500	1.15104e-05	21.4611
Ca6	26757751	26757900	1.20968e-08	32.2079								Ca4	40637801	40637900	1.21862e-05	24.0278
Ca6	26769001	26769100	7.33062e-07	25.9216								Ca4	40785551	40785650	3.66873e-07	29.0865
Ca6	27666951	27667100	3.66255e-13	34.3997								Ca4	41177701	41177800	3.22984e-06	17.1568
Ca6	27764951	27765050	3.34585e-11	26.8777								Ca4	41376301	41376450	8.27661e-07	17.5528
Ca6	27772501	27772600	1.00064e-07	26.7984								Ca4	41523901	41524000	9.32073e-06	16.9018
Ca6	27826201	27826300	1.81821e-08	30.9447								Ca4	41636801	41636950	1.06656e-06	20.6768
Ca6	27843851	27843950	4.55728e-09	31.6863								Ca4	42017651	42017750	2.94411e-08	18.7519
Ca6	27980351	27980450	1.91467e-06	27.4228								Ca4	42225301	42225400	1.21588e-06	15.7932
Ca6	28799951	28800050	7.94409e-11	31.7647								Ca4	42484951	42485050	2.30957e-05	15.2123
Ca6	29897151	29897250	7.36989e-06	28.4351								Ca4	42485051	42485150	1.3224e-07	17.7956
Ca6	30015951	30016050	1.26989e-09	26.6522								Ca4	42520501	42520600	2.33628e-07	16.1114
Ca6	30061151	30061250	1.43052e-07	25.1232								Ca4	42644451	42644600	4.67656e-06	21.6135
Ca6	31231251	31231350	7.32048e-08	29.33								Ca4	42702951	42703050	3.29718e-09	15.2984
Ca6	31240751	31240900	1.20372e-10	32.5752								Ca4	43406951	43407050	2.03037e-05	19.3182
Ca6	31388051	31388200	3.04544e-08	31.9628								Ca4	43698701	43698800	2.0756e-08	17.9025
Ca6	31530601	31530750	1.32083e-14	29.8137								Ca4	43763551	43763650	3.81778e-08	19.5333
Ca6	34536301	34536400	8.13248e-11	26.2996								Ca4	43932001	43932100	2.40097e-08	15.893
Ca6	34641051	34641200	1.99599e-11	30.9668								Ca4	43981901	43982050	8.17715e-07	18.6696
Ca6	35576151	35576300	1.92696e-10	38.0812								Ca4	43994651	43994750	4.98298e-06	15.2981
Ca6	35581601	35581750	2.93555e-07	33.9341								Ca4	44016101	44016200	2.51511e-06	30.4897
Ca6	37242351	37242450	1.99551e-26	48.2792								Ca4	44042701	44042800	2.23204e-06	25.6116
Ca6	37667651	37667800	1.46849e-10	27.9852								Ca4	44044901	44045050	7.47821e-06	19.5314
Ca6	37668401	37668500	1.61219e-11	28.2339								Ca4	44300851	44300950	1.36985e-05	16.6616
Ca6	38315651	38315750	3.76405e-05	25.2066								Ca4	44357151	44357250	2.75599e-06	24.9592
Ca6	38816601	38816750	1.70626e-10	31.7321								Ca4	44426401	44426500	8.89728e-06	15.0427
Ca6	38816751	38816900	2.97202e-14	26.8373								Ca4	44619351	44619550	3.7443e-08	21.1873
Ca6	38839001	38839100	1.77597e-07	30.4384								Ca4	44661551	44661650	8.31195e-08	16.8428
Ca6	41291351	41291450	1.15974e-06	30.2939								Ca4	44724801	44724950	4.78449e-08	23.3186
Ca6	41941001	41941100	7.73007e-24	46.8718								Ca4	44887551	44887650	1.7355e-09	18.0051
Ca6	42159851	42159950	1.21379e-07	27.8812								Ca4	44954351	44954450	9.8221e-06	16.6392
Ca6	42198651	42198750	6.42587e-09	30.1569								Ca4	45093951	45094100	3.70429e-06	18.3195
Ca6	42345451	42345550	1.26675e-08	28.4553								Ca4	45127751	45127850	5.04363e-08	15.0468
Ca6	42587151	42587250	1.94671e-07	25.9266								Ca4	45237951	45238050	4.71479e-06	25.7682
Ca6	44023401	44023550	1.09016e-10	31.9742								Ca4	45287251	45287350	7.71148e-06	16.3421
Ca6	44535551	44535700	1.33058e-05	27.6592								Ca4	45507751	45507850	9.86518e-09	15.5871
Ca6	44906751	44906850	9.92055e-08	25.872								Ca4	45632151	45632250	3.53073e-06	17.3089
Ca6	44910351	44910500	6.50193e-08	38.2695								Ca4	45876751	45876850	1.06533e-05	17.8141
Ca6	45477401	45477550	3.94501e-10	26.9903								Ca4	46272051	46272150	1.96295e-05	24.6641
Ca6	46538801	46538900	1.54585e-05	26.0118								Ca4	46279601	46279700	9.45224e-09	18.5656
Ca6	48039551	48039700	6.68512e-11	28.4206								Ca4	46366151	46366250	1.06533e-06	18.1261
Ca6	48174501	48174650	1.6526e-15	43.8362								Ca4	46398301	46398400	2.89179e-06	19.6267
Ca6	48542951	48543100	1.95928e-09	26.4652								Ca4	46460701	46460800	1.0147e-09	15.8213
Ca6	49162101	49162200	1.23301e-13	25.6863								Ca4	46526951	46527100	1.98712e-11	17.774
Ca6	49844601	49844700	1.87413e-06	27.1391								Ca4	46608801	46608900	1.88779e-09	18.3345
Ca6	50263501	50263600	3.05622e-11	28.7709								Ca4	46799701	46799800	2.20991e-05	22.3214
Ca6	50264701	50264800	1.88647e-10	35.4209								Ca4	46952701	46952800	2.49247e-05	17.7418
Ca6	50758851	50759000	5.64703e-10	27.6534								Ca4	46970601	46970750	6.09796e-10	19.0253
Ca6	50857651	50857750	1.23661e-10	35.9585								Ca4	47262551	47262650	7.23425e-06	16.147
Ca6	50858001	50858100	5.74342e-23	29.4952								Ca4	47265351	47265450	7.45669e-06	25.2269
Ca6	51062701	51062850	1.01044e-10	28.8616								Ca4	47323651	47323800	5.75209e-06	18.1579
Ca6	52054451	52054550	8.22355e-11	39.3985								Ca4	47483051	47483150	2.22744e-06	19.3018
Ca6	52799201	52799300	1.31546e-07	30.5309								Ca4	47490201	47490300	2.14608e-05	20.0414
Ca6	53245851	53245950	1.82382e-11	39.9618								Ca4	47516001	47516100	4.64472e-06	17.1635
Ca6	53606551	53606700	1.12244e-09	28.4138								Ca4	47527551	47527700	2.2531e-07	20.3734
Ca6	54228051	54228150	7.50471e-12	33.4113								Ca4	48038101	48038200	1.33235e-06	18.5032
Ca6	54240751	54240850	1.53202e-12	28.6556								Ca4	48181201	48181300	4.03753e-06	15.1786
Ca6	54716301	54716450	2.16036e-06	33.3469								Ca4	48342351	48342450	1.96987e-05	15.5573
Ca6	55226401	55226550	2.35674e-16	26.8908								Ca4	48552251	48552350	3.21048e-07	18.1244
Ca6	56029851	56030000	3.04042e-13	38.3765								Ca4	48589301	48589400	1.21085e-09	19.3788
Ca6	56540551	56540650	5.55634e-13	30.1614								Ca4	48612801	48612900	8.71878e-07	20.9313
Ca6	56753701	56753800	1.34566e-19	30.8967								Ca4	48692151	48692250	1.94253e-05	16.9765
Ca6	56872501	56872650	2.61944e-07	35.0905								Ca4	48723401	48723550	3.5285e-07	17.6829
Ca6	57111051	57111250	4.88267e-20	33.4602								Ca4	48737251	48737350	2.66448e-07	15.0353
Ca6	57765401	57765500	2.42845e-10	27.323								Ca4	48971651	48971750	1.40019e-05	20.0625
Ca6	57941351	57941450	2.14918e-13	46.2568								Ca4	49064201	49064350	8.57866e-06	19.1308
Ca6	58434251	58434350	1.3165e-16	33.9619								Ca5	115151	115250	7.54036e-07	-19.0802
Ca6	58513951	58514050	2.57016e-12	28.3129								Ca5	1589501	1589600	9.69578e-06	-17.5841
Ca6	58705501	58705600	1.81927e-16	45.3703								Ca5	2529951	2530050	1.32243e-07	-17.7048
Ca6	58777151	58777250	1.56488e-09	27.2411								Ca5	2876651	2876800	1.41482e-06	-16.2496
Ca6	58956751	58956900	3.60837e-19	39.8151								Ca5	3309751	3309850	1.51938e-05	-17.0343
Ca6	395751	395850	5.60255e-08	-28.0758								Ca5	3956501	3956600	1.20061e-05	-17.1493
Ca6	535201	535350	1.09198e-05	-31.041								Ca5	4575801	4575900	1.73573e-05	-20.0065
Ca6	929101	929200	9.42064e-15	-38.5521								Ca5	5053401	5053550	3.55792e-12	-15.5441
Ca6	949551	949750	1.09137e-20	-38.6663								Ca5	5148451	5148550	1.81652e-06	-20.7333
Ca6	1396801	1396950	5.15089e-07	-28.9215								Ca5	6326051	6326200	5.97716e-07	-20.2911
Ca6	1616851	1617000	1.59782e-05	-32.1159								Ca5	7430301	7430400	1.20845e-07	-19.7818
Ca6	1685251	1685400	9.98742e-08	-31.4794								Ca5	7865051	7865150	8.87019e-08	-19.6248
Ca6	1981101	1981200	9.61324e-14	-41.8618								Ca5	8288201	8288300	6.34812e-08	-17.7344
Ca6	2038751	2038850	1.22182e-09	-25.8073								Ca5	8578801	8578900	4.54399e-07	-16.0594
Ca6	2061551	2061650	8.97109e-09	-27.9934								Ca5	8674101	8674200	4.5137e-07	-15.8184
Ca6	2147551	2147650	5.17872e-07	-25.4618								Ca5	8765501	8765600	1.31314e-05	-16.7615
Ca6	2287201	2287300	1.85403e-12	-38.8459								Ca5	8937051	8937150	1.73782e-05	-21.2821
Ca6	2816701	2816850	5.51588e-07	-31.7766								Ca5	9079951	9080050	3.44284e-07	-17.6834
Ca6	2931351	2931450	2.41405e-10	-35.9821								Ca5	9238751	9238850	1.90383e-05	-16.854
Ca6	3096401	3096550	2.80843e-17	-40.631								Ca5	9355101	9355200	5.3427e-07	-19.8035
Ca6	3139151	3139250	2.86066e-05	-25.1872								Ca5	10439451	10439550	8.06889e-07	-16.4426
Ca6	3219401	3219500	7.64983e-06	-28.8499								Ca5	10780951	10781050	6.76396e-07	-15.0363
Ca6	3462851	3462950	7.8239e-08	-25.0372								Ca5	11364901	11365000	1.82979e-05	-15.617
Ca6	3598101	3598200	2.51998e-11	-28.105								Ca5	11618851	11618950	1.28424e-07	-15.9016
Ca6	3953751	3953850	5.56808e-09	-31.0606								Ca5	11861851	11861950	1.53071e-05	-32.6745
Ca6	4070101	4070200	1.2822e-06	-32.5462								Ca5	12103551	12103650	8.67339e-08	-21.061
Ca6	4174951	4175100	9.90666e-08	-30.5724								Ca5	12133351	12133450	1.70786e-05	-17.5045
Ca6	4649201	4649350	2.55495e-07	-25.4093								Ca5	12446201	12446300	1.09411e-08	-25.7303
Ca6	4724701	4724800	3.36977e-09	-36.0735								Ca5	12474701	12474800	4.46007e-06	-20.7282
Ca6	5061201	5061300	2.42938e-07	-30								Ca5	12699951	12700050	8.44294e-06	-16.9522
Ca6	5128101	5128200	1.04531e-07	-25.5795								Ca5	13027251	13027350	2.50155e-07	-22.2325
Ca6	5206001	5206150	2.39709e-16	-31.372								Ca5	14009051	14009150	3.13405e-06	-19.1813
Ca6	5208501	5208650	2.62323e-09	-32.3052								Ca5	14260601	14260800	3.24305e-08	-17.2698
Ca6	5536051	5536150	3.01736e-18	-44.9001								Ca5	15231301	15231400	1.60034e-05	-17.1585
Ca6	5661251	5661400	3.72465e-10	-28.8345								Ca5	15427801	15427900	6.4688e-07	-16.1851
Ca6	5696851	5697000	3.06867e-10	-37.42								Ca5	15661551	15661650	1.51976e-06	-20.6218
Ca6	6119851	6119950	1.04825e-06	-25.0345								Ca5	15695301	15695400	1.81702e-06	-25.3468
Ca6	6199151	6199250	3.53067e-07	-33.2647								Ca5	15976151	15976250	1.97345e-05	-15.1579
Ca6	6314301	6314400	2.59281e-14	-44.0055								Ca5	16109101	16109250	4.84109e-06	-24.0555
Ca6	6321901	6322050	5.40209e-13	-42.1714								Ca5	16542051	16542150	5.59521e-11	-32.7273
Ca6	6322001	6322150	7.07182e-21	-47.1528								Ca5	17335001	17335150	2.49527e-07	-22.6371
Ca6	7449851	7449950	1.94694e-05	-25.2672								Ca5	17552151	17552250	1.44243e-05	-20.2309
Ca6	7765451	7765550	9.70533e-13	-30.488								Ca5	17909551	17909650	2.0519e-06	-18.7582
Ca6	7768651	7768850	5.98527e-14	-32.9305								Ca5	17918601	17918700	2.05059e-05	-20.407
Ca6	7830801	7830900	7.54504e-09	-35.5238								Ca5	18960401	18960500	1.22108e-07	-17.3248
Ca6	7874601	7874750	5.14368e-17	-44.9862								Ca5	19361751	19361850	4.47227e-06	-15.0548
Ca6	8140351	8140450	4.3828e-10	-32.0983								Ca5	19469451	19469550	2.32009e-05	-16.0411
Ca6	8140501	8140600	6.28524e-10	-33.8437								Ca5	19471301	19471400	6.24256e-06	-15.86
Ca6	8163151	8163250	1.08681e-06	-25.02								Ca5	20068151	20068250	4.27548e-06	-17.1179
Ca6	8835201	8835400	7.60135e-05	-29.3548								Ca5	20334951	20335100	1.36135e-07	-18.1876
Ca6	9854151	9854300	8.29905e-07	-29.0323								Ca5	21062151	21062250	2.22618e-06	-15.0297
Ca6	10223801	10223900	1.72144e-12	-31.295								Ca5	21945851	21945950	1.06495e-06	-23.012
Ca6	10646601	10646700	5.59937e-10	-26.083								Ca5	22124851	22124950	1.78603e-05	-18.233
Ca6	10712101	10712200	1.3522e-11	-43.7331								Ca5	22213201	22213300	7.70869e-06	-16.0622
Ca6	11084051	11084200	1.93032e-10	-34.3516								Ca5	22579251	22579350	1.35279e-07	-22.3244
Ca6	13189651	13189800	5.64358e-17	-34.7041								Ca5	22613651	22613750	1.04403e-05	-18.4448
Ca6	14065901	14066100	1.87651e-10	-33.2339								Ca5	24088101	24088200	8.70631e-07	-15.8972
Ca6	14526251	14526350	3.63929e-07	-30.9796								Ca5	24491351	24491450	1.93756e-05	-18.1424
Ca6	14752751	14752900	1.82166e-08	-35.5254								Ca5	24956251	24956350	7.06362e-06	-15.6151
Ca6	14752851	14753000	3.23248e-25	-46.4641								Ca5	25917551	25917650	9.98636e-06	-17.6915
Ca6	14930401	14930550	1.43032e-15	-34.8081								Ca5	26301401	26301500	4.32753e-06	-17.171
Ca6	15339551	15339650	1.5696e-13	-45.5102								Ca5	26545201	26545300	8.97637e-12	-31.5447
Ca6	15362401	15362500	3.00189e-05	-27.6723								Ca5	27199251	27199350	1.21448e-07	-24.8387
Ca6	15752601	15752750	6.93748e-09	-31.6392								Ca5	27426051	27426150	3.58483e-08	-16.1047
Ca6	15753201	15753300	7.77853e-06	-27.7217								Ca5	28416801	28416900	4.40691e-06	-15.26
Ca6	16112651	16112750	5.02636e-13	-41.5215								Ca5	28999301	28999400	4.36661e-06	-18.9075
Ca6	16116551	16116650	6.78052e-11	-29.292								Ca5	30105501	30105600	4.17721e-07	-18.8441
Ca6	16450601	16450750	5.41327e-11	-31.227								Ca5	30337251	30337350	2.90746e-05	-15.0668
Ca6	17498401	17498500	4.26603e-08	-32.457								Ca5	30621401	30621550	1.62455e-05	-21.6219
Ca6	17529901	17530000	1.0149e-11	-28.656								Ca5	30786251	30786350	1.77943e-05	-18.6005
Ca6	18472051	18472200	5.58661e-13	-30.9009								Ca5	30843251	30843350	4.92652e-06	-22.0926
Ca6	18588751	18588900	2.36919e-05	-25.7235								Ca5	31468851	31468950	4.80021e-07	-15.7447
Ca6	18708101	18708200	9.14938e-13	-38.0864								Ca5	31667451	31667600	7.79636e-07	-18.1932
Ca6	19217401	19217500	2.31819e-07	-27.5914								Ca5	31771401	31771500	1.00682e-05	-15.4051
Ca6	19989501	19989600	4.26378e-09	-25.725								Ca5	31826751	31826900	9.93638e-06	-15.6388
Ca6	20671151	20671300	7.76069e-10	-28.2307								Ca5	32248901	32249000	2.73435e-08	-16.6823
Ca6	20901401	20901500	8.51019e-08	-33.8784								Ca5	32301901	32302000	1.47315e-06	-28.7694
Ca6	21003601	21003700	2.60629e-07	-29.9648								Ca5	32387651	32387750	4.65685e-06	-21.336
Ca6	21164051	21164150	5.56586e-20	-32.9896								Ca5	32559351	32559450	2.94723e-05	-23.037
Ca6	21669201	21669350	1.42872e-08	-38.489								Ca5	32786751	32786850	1.923e-08	-21.6356
Ca6	22431001	22431150	3.20883e-16	-42.4345								Ca5	33006801	33006900	1.36603e-05	-20
Ca6	23014251	23014350	1.45624e-06	-25.9621								Ca5	33497751	33497900	5.04574e-07	-21.2017
Ca6	23446401	23446550	2.0677e-07	-27.987								Ca5	33661251	33661350	7.40155e-06	-24.9506
Ca6	23575601	23575700	6.90935e-12	-32.2002								Ca5	33715701	33715800	1.52636e-05	-18.6113
Ca6	23664401	23664500	1.17651e-09	-25.3574								Ca5	33790601	33790700	3.27407e-06	-20.6881
Ca6	23977851	23977950	4.88541e-11	-32.924								Ca5	33965051	33965150	4.44894e-07	-15.001
Ca6	24040151	24040250	9.79833e-08	-26.3848								Ca5	34184801	34184900	4.41187e-06	-25.8862
Ca6	24057901	24058000	1.07687e-07	-25.8082								Ca5	34258151	34258250	4.66603e-07	-21.1204
Ca6	24743001	24743100	9.54692e-05	-25.1183								Ca5	34471251	34471350	6.42672e-06	-17.1533
Ca6	25001151	25001250	2.64069e-17	-37.837								Ca5	34501601	34501700	2.88194e-06	-21.4608
Ca6	26383651	26383750	1.61616e-08	-25.3896								Ca5	34837451	34837550	3.58979e-08	-27.1266
Ca6	26664051	26664150	2.00278e-06	-27.8822								Ca5	35014701	35014800	1.14361e-06	-15.5266
Ca6	27200501	27200600	6.60487e-08	-31.3346								Ca5	35070701	35070800	4.23208e-10	-25.1247
Ca6	27584701	27584800	4.97476e-08	-29.3478								Ca5	35111151	35111250	8.25288e-06	-17.3405
Ca6	27886551	27886650	5.2221e-09	-37.3071								Ca5	35203351	35203450	1.5713e-06	-16.7655
Ca6	29400451	29400550	1.82287e-07	-29.1865								Ca5	35222201	35222300	5.42805e-07	-19.6739
Ca6	29765401	29765500	0.000194958	-27.8412								Ca5	35407351	35407450	2.03363e-06	-18.2355
Ca6	29926751	29926850	4.60493e-07	-27.7649								Ca5	36314951	36315050	8.12333e-06	-28.1491
Ca6	30282651	30282750	3.57974e-07	-26.0842								Ca5	36824701	36824800	2.66378e-05	-15.9511
Ca6	31234601	31234700	2.98974e-06	-31.1687								Ca5	37840851	37840950	1.38958e-05	-15.874
Ca6	33718051	33718150	3.98723e-08	-37.069								Ca5	37892801	37892950	1.38126e-09	-31.9654
Ca6	35882001	35882100	4.00001e-07	-28.2056								Ca5	38068951	38069050	1.47767e-05	-19.01
Ca6	36310101	36310300	2.01469e-20	-27.4146								Ca5	38749401	38749550	3.965e-08	-21.9604
Ca6	36698551	36698700	6.8309e-09	-32.9932								Ca5	39150451	39150550	1.86143e-07	-16.5878
Ca6	36698651	36698800	3.16814e-06	-28.8038								Ca5	39345501	39345600	2.57071e-07	-20.8182
Ca6	37067901	37068000	2.90584e-17	-42.937								Ca5	39394101	39394200	2.01165e-07	-22.5109
Ca6	38308851	38309000	1.6085e-08	-31.8722								Ca5	39942201	39942300	2.14611e-05	-21.7575
Ca6	39486401	39486550	6.33124e-08	-28.3682								Ca5	40227501	40227600	8.36726e-06	-20.8748
Ca6	39486651	39486750	3.43423e-12	-27.1213								Ca5	40432451	40432550	2.6956e-05	-21.6667
Ca6	39702901	39703050	3.32479e-13	-27.2437								Ca5	40713351	40713450	2.36554e-06	-19.1358
Ca6	39835151	39835250	1.82932e-08	-33.211								Ca5	40941501	40941600	1.06531e-05	-20.2878
Ca6	41737201	41737300	1.21907e-07	-33.3333								Ca5	41102401	41102500	6.71226e-08	-16.5684
Ca6	42775551	42775650	3.91402e-05	-28.0864								Ca5	41413801	41413900	1.04026e-07	-17.4168
Ca6	44391701	44391800	5.90005e-11	-27.9589								Ca5	42788001	42788100	2.77152e-05	-20.3081
Ca6	44907651	44907750	3.11772e-11	-27.575								Ca5	43097001	43097100	7.22947e-07	-21.4291
Ca6	45147251	45147350	4.78751e-10	-36.0617								Ca5	43319601	43319700	1.32797e-05	-23.5326
Ca6	45317451	45317550	1.3249e-07	-26.4898								Ca5	44014051	44014150	8.39217e-08	-23.6732
Ca6	45344301	45344400	6.39042e-06	-26.4557								Ca5	44044451	44044550	4.18958e-07	-19.3005
Ca6	46458601	46458700	1.08453e-06	-25.4827								Ca5	44477401	44477500	9.81517e-07	-15.4877
Ca6	47023951	47024050	6.972e-14	-46.5588								Ca5	44593801	44593900	5.50771e-06	-15.9091
Ca6	48699851	48699950	1.27799e-07	-27.51								Ca5	44922251	44922350	2.2452e-10	-25.2442
Ca6	49849551	49849650	2.85114e-09	-27.1682								Ca5	44987401	44987500	4.03144e-06	-17.545
Ca6	49888701	49888850	1.29874e-15	-34.2895								Ca5	45220901	45221000	1.80731e-05	-16.5535
Ca6	50340401	50340500	8.57354e-08	-30.7348								Ca5	45383501	45383600	2.31245e-05	-16.0405
Ca6	51020051	51020200	5.80858e-14	-32.9491								Ca5	45614301	45614400	5.35864e-06	-20.1136
Ca6	51455951	51456150	1.20443e-12	-37.2303								Ca5	45724101	45724250	5.82304e-06	-25.4986
Ca6	51458151	51458300	1.41597e-18	-44.8223								Ca5	45969151	45969250	6.73489e-06	-23.9766
Ca6	51458251	51458400	1.94563e-12	-44.3164								Ca5	46909701	46909800	5.63278e-06	-20.3976
Ca6	51464051	51464150	1.17616e-09	-37.4723								Ca5	46930101	46930200	1.27698e-05	-15.7167
Ca6	52414001	52414150	2.82726e-07	-31.3757								Ca5	47282001	47282100	4.25891e-06	-15.0147
Ca6	53698351	53698450	6.75055e-11	-32.4782								Ca5	47504401	47504500	2.62316e-05	-15.3501
Ca6	54808951	54809050	1.93992e-08	-35.3686								Ca5	237451	237550	2.36838e-05	15.0931
Ca6	54809301	54809450	1.6278e-07	-28.176								Ca5	1285601	1285750	1.84669e-07	28.2961
Ca6	54809701	54809800	5.46357e-09	-30.0546								Ca5	2231251	2231350	9.73714e-07	20.0804
Ca6	55965901	55966050	4.37675e-05	-27.6069								Ca5	2971151	2971300	1.45929e-06	20.061
Ca6	56056851	56056950	6.08986e-31	-39.342								Ca5	2993901	2994000	4.36928e-09	16.7259
Ca6	56505101	56505200	1.88661e-40	-31.175								Ca5	3214451	3214550	1.63213e-07	16.7565
Ca6	56887401	56887500	2.04171e-08	-27.1256								Ca5	3380501	3380600	1.98835e-05	23.0943
Ca6	56887551	56887650	3.27465e-08	-26.1338								Ca5	3598801	3598900	2.94264e-05	21.0749
Ca6	57124801	57124950	1.18426e-07	-25.4254								Ca5	4666001	4666100	1.47927e-05	16.8071
Ca6	57181151	57181300	4.90483e-14	-29.8692								Ca5	5070451	5070550	3.9892e-06	18.3206
Ca6	57449351	57449450	1.33187e-06	-26.9244								Ca5	5240851	5240950	1.0105e-05	16.0024
Ca6	57572101	57572200	2.80248e-09	-33.212								Ca5	5887951	5888050	1.77959e-08	20.2252
Ca6	57585601	57585700	1.9585e-11	-35.8719								Ca5	6995751	6995850	4.02688e-07	15.3467
Ca6	57710801	57710900	1.8223e-06	-25.8534								Ca5	7102201	7102300	1.38641e-05	15.377
Ca6	58049801	58049900	1.17606e-08	-28.5959								Ca5	7127351	7127450	2.81192e-05	15.5573
Ca6	58113901	58114050	2.46753e-10	-27.488								Ca5	7217051	7217200	9.03603e-06	29.2311
Ca6	58661901	58662000	3.6774e-09	-28.8762								Ca5	7304401	7304550	1.57343e-08	21.99
Ca6	58708401	58708500	1.04366e-07	-31.316								Ca5	7465101	7465200	5.82146e-08	22.3621
Ca6	58722301	58722400	1.92714e-06	-30.1709								Ca5	7473551	7473650	3.38607e-08	29.0368
Ca6	59007651	59007800	1.76105e-16	-35.8985								Ca5	7474051	7474150	1.69848e-05	18.6508
Ca6	59007801	59007900	1.34795e-11	-26.9254								Ca5	7581901	7582000	1.33269e-05	20.0428
Ca7	16501	16650	1.90819e-10	27.4191								Ca5	7622601	7622700	1.97149e-10	16.1186
Ca7	37801	37900	7.24988e-09	27.958								Ca5	7832701	7832800	2.9834e-06	20.9161
Ca7	761401	761550	3.24726e-13	33.9781								Ca5	7895901	7896000	5.503e-06	21.6942
Ca7	990151	990300	6.53539e-12	36.3975								Ca5	8434851	8434950	2.04509e-05	28.2075
Ca7	1211401	1211500	1.15267e-16	35.0216								Ca5	8656751	8656850	5.14678e-07	15.1092
Ca7	1468401	1468500	1.2604e-09	26.9294								Ca5	8765651	8765800	5.06736e-09	18.6834
Ca7	1468751	1468850	7.70144e-22	36.4406								Ca5	8875051	8875200	1.88399e-05	19.0816
Ca7	1627901	1628000	3.31519e-07	26.9952								Ca5	9451501	9451600	1.80018e-05	15.7315
Ca7	2313901	2314000	8.35095e-08	29.5232								Ca5	9485501	9485600	2.54844e-05	15.5857
Ca7	2472451	2472550	1.02395e-05	26.4583								Ca5	9579251	9579350	8.88437e-08	34.9524
Ca7	2703651	2703750	2.18304e-05	27.1819								Ca5	9763651	9763750	9.1435e-09	15.0461
Ca7	2997251	2997350	1.10511e-07	25.2236								Ca5	10017151	10017250	2.13136e-09	32.1565
Ca7	3358501	3358600	6.87952e-06	25.1885								Ca5	10059951	10060100	1.22821e-05	15.3603
Ca7	3596551	3596650	5.84168e-10	25.6284								Ca5	10393951	10394050	5.05747e-06	16.5411
Ca7	3883001	3883100	1.51297e-07	29.1412								Ca5	10456301	10456400	6.69827e-06	21.2625
Ca7	3890801	3890900	1.88642e-08	34.073								Ca5	10779601	10779700	3.39381e-06	20.679
Ca7	4344401	4344550	1.26581e-07	26.9962								Ca5	10962051	10962150	1.80192e-05	21.5268
Ca7	4384351	4384450	2.67797e-08	28.5215								Ca5	12099051	12099150	1.5392e-08	16.5691
Ca7	4735301	4735500	6.55168e-14	31.0117								Ca5	12107551	12107650	1.4263e-05	20.5357
Ca7	4812551	4812650	8.37107e-08	26.8618								Ca5	12226351	12226450	1.99441e-06	19.5405
Ca7	5106001	5106100	3.25859e-09	33.3333								Ca5	12565951	12566050	2.22698e-05	17.0418
Ca7	5260001	5260100	2.22449e-09	26.7712								Ca5	13109751	13109900	1.20877e-09	26.346
Ca7	5521451	5521550	2.23165e-11	27.7919								Ca5	13884051	13884200	6.58867e-07	17.8412
Ca7	5590501	5590600	2.71453e-26	42.6109								Ca5	14042651	14042750	5.33502e-06	24.9471
Ca7	5833351	5833500	3.91541e-05	27.8927								Ca5	14257901	14258000	9.9138e-07	21.4965
Ca7	5849851	5850000	1.15108e-10	26.0319								Ca5	14669951	14670050	2.12059e-05	15.3744
Ca7	5985651	5985750	2.6011e-09	30.5705								Ca5	14759451	14759550	5.14343e-08	16.0094
Ca7	6306951	6307100	1.60223e-08	30.8718								Ca5	15110901	15111000	3.96702e-06	15.8519
Ca7	6375701	6375800	6.19616e-07	27.6161								Ca5	16026551	16026750	1.82247e-05	22.9938
Ca7	6462351	6462500	1.055e-05	30.0443								Ca5	16028501	16028600	7.666e-06	16.8007
Ca7	6502151	6502250	3.16051e-07	27.2522								Ca5	16394651	16394800	7.21134e-12	16.3589
Ca7	7006751	7006850	2.93401e-17	52.1982								Ca5	16563801	16563900	2.12226e-05	16.4824
Ca7	7056901	7057000	4.92983e-08	32.9301								Ca5	16755551	16755650	7.52533e-07	18.002
Ca7	7182751	7182850	1.50684e-09	38.5059								Ca5	16920601	16920700	1.27088e-10	17.2535
Ca7	7446101	7446250	1.74018e-12	30.7197								Ca5	16997051	16997150	1.78532e-07	25.6693
Ca7	7786751	7786900	2.14399e-07	27.9742								Ca5	17244751	17244850	4.4887e-06	21.9044
Ca7	7839151	7839350	5.94175e-11	31.2497								Ca5	17710351	17710450	7.58495e-07	17.0507
Ca7	8102551	8102650	1.9639e-08	28.5441								Ca5	17710601	17710700	1.72439e-09	16.9015
Ca7	8137501	8137600	1.5476e-08	31.2821								Ca5	18346501	18346650	1.14703e-07	17.5013
Ca7	8312401	8312500	3.85275e-17	27.2698								Ca5	18548101	18548250	5.04667e-06	18.799
Ca7	8415701	8415800	8.70891e-10	27.1772								Ca5	18899201	18899300	1.10631e-05	16.3129
Ca7	8491501	8491600	1.61291e-09	29.7831								Ca5	19548001	19548150	5.35177e-09	21.6832
Ca7	8838151	8838250	1.52842e-07	26.5508								Ca5	19559701	19559900	1.30019e-06	16.0032
Ca7	9135601	9135750	1.68129e-07	26.357								Ca5	19971951	19972150	1.72087e-05	22.0862
Ca7	9348351	9348500	7.77118e-07	32.317								Ca5	20215101	20215200	3.46262e-06	18.868
Ca7	9508301	9508450	5.04625e-06	27.1257								Ca5	20219351	20219450	1.25139e-10	15.7373
Ca7	9577701	9577850	1.83627e-16	30.7668								Ca5	20428551	20428650	1.47937e-08	18.3146
Ca7	9585401	9585500	3.01973e-08	31.5706								Ca5	20836151	20836250	2.76346e-09	15.7685
Ca7	10016751	10016850	6.31113e-08	30.3111								Ca5	22137951	22138050	1.22203e-07	19.012
Ca7	10329851	10329950	2.36839e-05	25.0667								Ca5	22786451	22786600	1.8919e-07	17.9733
Ca7	10459101	10459200	1.6669e-08	26.4216								Ca5	23720151	23720250	3.63174e-08	22.4299
Ca7	10627051	10627150	2.28903e-17	33.7973								Ca5	23807201	23807350	2.19318e-05	21.8955
Ca7	10687701	10687850	4.73909e-16	44.8492								Ca5	23850801	23850950	7.16324e-08	17.2908
Ca7	10696501	10696650	5.95884e-10	27.2483								Ca5	23871301	23871500	8.47215e-08	19.5509
Ca7	10800051	10800150	1.29305e-17	41.5359								Ca5	23872101	23872250	6.05854e-11	26.1976
Ca7	11141601	11141700	1.11719e-07	27.959								Ca5	23955201	23955300	7.10909e-06	17.5491
Ca7	11186251	11186400	9.88665e-05	32.0408								Ca5	24027951	24028050	4.24059e-06	15.0168
Ca7	11471751	11471850	8.50403e-07	27.5862								Ca5	24647101	24647200	6.11943e-06	17.638
Ca7	11733901	11734050	2.07003e-11	37.336								Ca5	24799251	24799350	6.80289e-10	18.7245
Ca7	12184801	12184900	4.88728e-08	26.8531								Ca5	24877701	24877850	8.18137e-08	17.4012
Ca7	12334201	12334300	4.36675e-06	28.0184								Ca5	24952201	24952350	2.77313e-05	19.2037
Ca7	12697151	12697250	2.77622e-09	26.7692								Ca5	24976901	24977000	4.48019e-08	15.9749
Ca7	12770901	12771050	5.40382e-10	30.2716								Ca5	25150501	25150600	2.75014e-06	26.592
Ca7	13389751	13389900	1.28966e-08	31.9411								Ca5	25365401	25365500	1.37846e-05	16.9794
Ca7	13454901	13455050	8.14143e-07	33.223								Ca5	25390751	25390900	2.0151e-07	19.3048
Ca7	13677201	13677300	7.8492e-18	49.3259								Ca5	25614751	25614850	2.6763e-06	16.266
Ca7	14587301	14587450	3.08974e-09	34.1222								Ca5	25692701	25692850	2.35775e-06	20.8329
Ca7	14933201	14933350	2.60054e-11	32.5484								Ca5	25723551	25723650	7.06564e-08	26.9041
Ca7	14933351	14933450	1.32615e-08	25.4393								Ca5	25746951	25747050	8.93221e-06	21.9533
Ca7	15169851	15170000	1.11687e-07	31.9897								Ca5	25796901	25797000	7.32286e-07	19.1541
Ca7	15570451	15570550	3.3126e-13	40.785								Ca5	25800301	25800400	5.47505e-06	16.7469
Ca7	16274351	16274500	2.90053e-12	39.4882								Ca5	25891101	25891200	1.76262e-05	15.5949
Ca7	16610051	16610150	3.60854e-06	28.7494								Ca5	26187851	26187950	1.6736e-06	23.0695
Ca7	16704001	16704150	1.50842e-13	48.8073								Ca5	26259201	26259300	7.12245e-06	20.9016
Ca7	16756851	16756950	1.25055e-06	27.4451								Ca5	26295151	26295250	9.07712e-10	17.8321
Ca7	17899501	17899650	9.6374e-08	26.8464								Ca5	26303451	26303550	1.79566e-09	17.3333
Ca7	18430651	18430750	7.33434e-17	42.2969								Ca5	26703201	26703300	1.91688e-13	26.9723
Ca7	18720251	18720400	9.00795e-16	29.8758								Ca5	26840051	26840150	5.41016e-09	21.7014
Ca7	18925451	18925600	9.57295e-20	43.7563								Ca5	27032551	27032650	1.08106e-06	16.9025
Ca7	18925551	18925700	3.15935e-11	32.8838								Ca5	27113051	27113150	9.52381e-08	19.7726
Ca7	19382501	19382650	1.88282e-08	35.7909								Ca5	27366501	27366600	1.12501e-05	15.1739
Ca7	20684351	20684500	7.91295e-14	36.4591								Ca5	27400201	27400300	1.27447e-05	15.4405
Ca7	20690451	20690550	3.43199e-07	27.2889								Ca5	27619701	27619800	3.91509e-07	17.9669
Ca7	20690601	20690700	2.16044e-08	29.9813								Ca5	27840401	27840500	9.62356e-06	29.4118
Ca7	20991251	20991350	4.78924e-13	34.5586								Ca5	27850001	27850100	3.78579e-12	18.708
Ca7	21814501	21814650	8.22047e-06	27.9754								Ca5	27850101	27850200	4.76466e-07	18.99
Ca7	21887251	21887400	2.25894e-11	33.6771								Ca5	27883501	27883600	2.78126e-07	21.8824
Ca7	22375001	22375100	3.63624e-11	31.2911								Ca5	27963101	27963200	5.04862e-06	15.2545
Ca7	23008501	23008600	4.01456e-12	36.6867								Ca5	28097551	28097650	7.60893e-06	16.5696
Ca7	23601501	23601650	1.8546e-09	38.6931								Ca5	28223751	28223850	1.33144e-06	15.7002
Ca7	24964851	24964950	1.40316e-07	29.3448								Ca5	28291401	28291500	2.50564e-06	24.3821
Ca7	25095351	25095450	3.62091e-06	26.6112								Ca5	28300751	28300850	2.85283e-05	27.6923
Ca7	25604301	25604400	4.89736e-11	41.0775								Ca5	28411001	28411150	3.4512e-07	18.5451
Ca7	25607651	25607750	1.29672e-18	46.8325								Ca5	28444401	28444500	1.72398e-08	20.9778
Ca7	26148301	26148400	8.56052e-12	35.5877								Ca5	28500351	28500450	8.87545e-06	20.3572
Ca7	26734401	26734500	1.54949e-08	27.3733								Ca5	28551801	28551900	7.67228e-07	16.0505
Ca7	27304851	27304950	4.46595e-09	29.9196								Ca5	29046151	29046250	4.31272e-09	17.9528
Ca7	27397351	27397500	6.18038e-15	37.456								Ca5	29077551	29077650	2.00056e-12	29.7321
Ca7	28779301	28779400	1.92908e-08	26.9186								Ca5	29129051	29129200	6.97071e-06	19.9167
Ca7	28920601	28920700	1.54796e-13	43.641								Ca5	29356801	29356900	2.77515e-05	15.5579
Ca7	29039651	29039800	1.37392e-17	34.1713								Ca5	29401251	29401350	3.30063e-07	30.1337
Ca7	29104451	29104550	2.14782e-08	28.7753								Ca5	29457151	29457300	1.1974e-09	22.3416
Ca7	29142001	29142100	9.2738e-14	44.0024								Ca5	29475351	29475500	1.50836e-07	25.8673
Ca7	29688301	29688400	7.6716e-08	25.263								Ca5	29573851	29573950	1.34691e-05	16.2618
Ca7	29764251	29764350	1.35882e-06	29.676								Ca5	29602551	29602650	7.60271e-06	16.0922
Ca7	29965251	29965350	1.24325e-07	25.1989								Ca5	29656701	29656800	3.38419e-08	20.1754
Ca7	30789151	30789250	1.54893e-06	30.9587								Ca5	29744901	29745050	7.58717e-06	17.5241
Ca7	30804951	30805150	6.34563e-12	30.7332								Ca5	29745701	29745800	7.58248e-09	18.475
Ca7	31125951	31126050	9.80178e-13	44.5644								Ca5	29769951	29770100	2.01219e-08	22.6901
Ca7	31165101	31165200	2.58686e-07	26.1789								Ca5	29857351	29857450	2.44308e-07	20.0776
Ca7	31401851	31402000	3.77357e-09	29.9576								Ca5	30115451	30115550	5.03025e-06	20.5391
Ca7	31616751	31616850	1.77946e-09	29.1129								Ca5	30148551	30148650	1.64597e-05	17.9556
Ca7	31941951	31942050	2.5e-09	34.053								Ca5	30178601	30178700	1.30672e-05	18.9527
Ca7	32152451	32152600	1.73422e-16	30.5775								Ca5	30404951	30405050	2.70341e-06	15.6516
Ca7	32248701	32248800	4.74323e-12	32.9004								Ca5	30484601	30484700	3.06791e-06	18.9384
Ca7	32324901	32325000	2.03804e-06	27.1865								Ca5	30575501	30575600	7.87086e-08	20.6436
Ca7	32411751	32411900	1.45051e-15	35.4785								Ca5	30718001	30718150	1.93847e-11	18.0494
Ca7	32416601	32416700	3.41485e-10	25.4685								Ca5	30908651	30908750	2.38557e-06	29.9489
Ca7	32488201	32488300	5.46471e-08	32.6746								Ca5	30920201	30920350	3.39931e-07	20.6442
Ca7	32505551	32505650	3.64139e-07	26.511								Ca5	31375651	31375750	1.09948e-05	16.2919
Ca7	33242151	33242300	1.78505e-14	36.1572								Ca5	31531351	31531450	4.66377e-06	18.1793
Ca7	33410301	33410500	4.63853e-13	36.4006								Ca5	31542301	31542400	1.67502e-06	15.252
Ca7	33861351	33861500	4.5828e-28	44.3019								Ca5	31671701	31671800	5.56129e-06	17.8169
Ca7	34574951	34575050	3.89582e-10	32.265								Ca5	31812701	31812800	1.11548e-05	17.8691
Ca7	35088401	35088500	2.47353e-05	25.742								Ca5	31886051	31886150	1.41332e-05	18.4274
Ca7	35090101	35090250	7.3344e-10	31.0814								Ca5	32015051	32015150	1.06247e-05	25.2906
Ca7	35222051	35222150	1.4915e-08	26.4014								Ca5	32537501	32537650	1.6383e-08	23.256
Ca7	35257701	35257850	5.03874e-10	30.6092								Ca5	32816101	32816200	1.99884e-06	28.0204
Ca7	35261451	35261550	2.63021e-08	28.7894								Ca5	32820951	32821100	3.44293e-06	20.0635
Ca7	35262751	35262900	6.48359e-05	25.1698								Ca5	32841801	32841900	3.56267e-08	17.422
Ca7	36771001	36771100	5.13283e-08	26.4496								Ca5	32849251	32849350	9.32421e-06	29.6327
Ca7	38774601	38774700	1.14504e-09	29.7124								Ca5	32976101	32976250	2.61402e-07	28.0974
Ca7	40244301	40244400	3.02305e-17	47.963								Ca5	33000601	33000700	1.14436e-05	24.7708
Ca7	40647201	40647350	3.595e-08	33.9363								Ca5	33056051	33056150	1.02965e-05	15.2572
Ca7	40847601	40847750	9.80948e-23	34.2348								Ca5	33096351	33096500	1.32756e-08	25.3704
Ca7	41743851	41743950	7.90359e-10	41.9373								Ca5	33547201	33547300	1.13473e-06	18.9872
Ca7	41745001	41745100	1.15561e-10	29.3033								Ca5	33739851	33740000	5.51862e-08	16.774
Ca7	41746001	41746100	2.59297e-05	26.0872								Ca5	33845101	33845200	2.78534e-05	15.6789
Ca7	42078951	42079050	2.10264e-06	29.6624								Ca5	34052751	34052850	4.86494e-06	15.7246
Ca7	42941751	42941900	1.52539e-09	33.2414								Ca5	34086901	34087000	6.6504e-07	24.3848
Ca7	43080801	43080900	1.85163e-10	33.4962								Ca5	34467451	34467550	1.53015e-05	17.4057
Ca7	43265201	43265300	7.75289e-12	36.1878								Ca5	34551751	34551900	4.56166e-08	20.7897
Ca7	43555801	43555900	4.46119e-12	25.5496								Ca5	35067301	35067400	1.44098e-05	15.9969
Ca7	44131601	44131700	1.23336e-13	38.8272								Ca5	35072351	35072450	1.10994e-07	18.613
Ca7	44262251	44262400	3.2711e-06	27.924								Ca5	35481451	35481550	4.22273e-07	16.3522
Ca7	45271451	45271600	1.44815e-05	25.7224								Ca5	35511701	35511800	2.15693e-06	19.4083
Ca7	45306451	45306600	3.32852e-12	26.1621								Ca5	35900551	35900650	2.70507e-05	16.8934
Ca7	46350151	46350300	5.20075e-09	33.1624								Ca5	35974601	35974700	6.72862e-08	19.5173
Ca7	46350251	46350450	7.23903e-11	26.0292								Ca5	36392801	36392900	4.87389e-08	17.0263
Ca7	46894251	46894400	1.13984e-05	31.7235								Ca5	36772051	36772150	2.22119e-06	28.187
Ca7	46894451	46894550	2.20564e-05	27.0453								Ca5	36824601	36824700	1.49833e-05	17.9981
Ca7	47154501	47154600	3.20301e-06	25.8865								Ca5	36928101	36928200	2.47583e-10	20.969
Ca7	47155501	47155650	3.46975e-07	27.1184								Ca5	37287801	37287900	1.36281e-08	39.1366
Ca7	47241601	47241700	5.78157e-14	37.6531								Ca5	37790651	37790750	8.9833e-08	21.6253
Ca7	47309151	47309300	3.51488e-08	25.5234								Ca5	38063801	38063900	1.40068e-07	17.4512
Ca7	142401	142500	5.34935e-07	-29.3249								Ca5	38083701	38083850	1.9325e-05	27.166
Ca7	576851	577000	5.80274e-10	-28.4244								Ca5	38098251	38098350	5.48285e-07	21.2934
Ca7	682251	682350	9.77332e-20	-32.5867								Ca5	38463651	38463750	1.17215e-07	16.9835
Ca7	1006101	1006250	5.09327e-09	-29.024								Ca5	38727551	38727650	7.27205e-07	15.1519
Ca7	1517501	1517600	5.1429e-07	-28.0466								Ca5	39310551	39310650	1.89654e-05	21.1314
Ca7	1797651	1797750	9.95413e-12	-25.7044								Ca5	39391951	39392050	7.27579e-08	22.0536
Ca7	2468751	2468900	3.27575e-09	-26.1535								Ca5	40046851	40046950	5.57569e-06	16.7299
Ca7	2499601	2499700	1.57946e-07	-26.8473								Ca5	40064351	40064450	2.50252e-06	15.7959
Ca7	2568251	2568350	9.90091e-06	-28.6325								Ca5	40083801	40083900	5.14729e-06	15.2356
Ca7	2881101	2881200	3.30961e-10	-38.9312								Ca5	40132051	40132150	1.21765e-05	15.4802
Ca7	2923201	2923300	3.29845e-07	-29.0404								Ca5	40227001	40227150	5.80157e-07	20.7196
Ca7	2946651	2946750	8.62526e-12	-31.4466								Ca5	40367851	40367950	2.15568e-05	15.9371
Ca7	3217701	3217800	3.16283e-13	-34.4927								Ca5	40594901	40595000	3.61593e-06	23.7195
Ca7	3264551	3264650	7.07137e-08	-33.4783								Ca5	40608051	40608150	2.59144e-08	26.3937
Ca7	3286901	3287000	2.52898e-24	-47.1279								Ca5	40743951	40744050	2.77705e-06	18.4034
Ca7	3354801	3354950	3.49009e-11	-27.1867								Ca5	40819951	40820050	2.03341e-05	21.4228
Ca7	3355051	3355200	1.08115e-11	-30.9262								Ca5	40834551	40834650	1.22858e-05	17.7928
Ca7	3859401	3859500	3.35164e-08	-29.9085								Ca5	41124451	41124550	4.30621e-06	15.4287
Ca7	3888651	3888800	3.73465e-10	-32.716								Ca5	41189401	41189500	4.33898e-06	16.9158
Ca7	3919601	3919750	7.63124e-12	-35.1141								Ca5	41597201	41597300	9.71644e-06	20.8985
Ca7	3965301	3965450	2.73749e-09	-33.9648								Ca5	41771301	41771450	1.22154e-09	18.8005
Ca7	4168901	4169000	4.22266e-22	-44.9463								Ca5	41861151	41861300	3.97802e-06	20.9866
Ca7	4181351	4181450	2.93022e-08	-26.6156								Ca5	42051051	42051150	2.54796e-07	15.3226
Ca7	4343001	4343100	3.33586e-09	-32.7064								Ca5	42072801	42072900	2.5762e-06	15.3433
Ca7	4345351	4345450	5.60516e-11	-34.5886								Ca5	42106901	42107000	2.08846e-07	15.6727
Ca7	4436151	4436250	1.44467e-10	-27.6448								Ca5	42253401	42253500	2.3159e-05	16.5541
Ca7	4926901	4927050	4.04882e-08	-36.2405								Ca5	42267801	42267900	4.13316e-06	27.3849
Ca7	5529401	5529500	2.76209e-06	-25.3028								Ca5	42298901	42299050	5.39236e-07	25.6292
Ca7	5535101	5535200	2.08532e-09	-26.5493								Ca5	42552101	42552200	4.8071e-08	25.1274
Ca7	6233851	6233950	8.06341e-08	-25.6078								Ca5	42596101	42596200	2.07784e-06	17.3582
Ca7	6257051	6257150	9.96044e-05	-26.586								Ca5	42679951	42680050	6.85991e-07	21.8549
Ca7	6277601	6277700	6.87734e-18	-52.0375								Ca5	42736101	42736200	3.31716e-07	16.5149
Ca7	6544251	6544350	1.39848e-11	-36.4662								Ca5	42812301	42812400	9.51361e-07	15.6105
Ca7	7140701	7140800	2.96093e-09	-32.0709								Ca5	42895051	42895150	1.64281e-08	23.2972
Ca7	8177601	8177700	5.28779e-09	-36.2316								Ca5	42915951	42916100	1.46015e-07	23.5326
Ca7	8384651	8384750	5.23081e-20	-32.5322								Ca5	43103851	43103950	1.50682e-08	24.4444
Ca7	9038201	9038300	1.22978e-06	-31.1034								Ca5	43105451	43105550	2.67484e-07	21.7917
Ca7	10457551	10457700	9.88226e-06	-26.9414								Ca5	43313151	43313250	1.21647e-05	15.091
Ca7	10948801	10949000	7.18936e-23	-31.7857								Ca5	43345601	43345700	2.94981e-07	17.6809
Ca7	11735051	11735200	1.20237e-10	-26.4767								Ca5	43640801	43640900	5.00647e-06	15.0161
Ca7	12077151	12077300	6.39181e-08	-27.01								Ca5	43655051	43655150	9.83733e-06	18.1801
Ca7	12192501	12192600	6.44942e-08	-25.9903								Ca5	43656451	43656550	3.18915e-07	18.6119
Ca7	12383751	12383850	9.29878e-07	-26.1427								Ca5	43656751	43656850	8.16253e-06	16.195
Ca7	13751201	13751300	1.09432e-07	-25.5647								Ca5	43706251	43706350	1.6218e-06	16.6743
Ca7	13751401	13751500	1.30712e-09	-29.2221								Ca5	43736101	43736200	1.38086e-05	19.015
Ca7	13771251	13771350	8.55118e-11	-27.9524								Ca5	43885851	43885950	1.18449e-05	21.0956
Ca7	13804151	13804250	2.4245e-09	-31.4181								Ca5	43899651	43899750	3.12888e-06	15.2383
Ca7	14278901	14279050	1.05039e-11	-28.1312								Ca5	43928551	43928700	2.02398e-09	27.1848
Ca7	14526401	14526500	9.51719e-14	-25.3561								Ca5	44022951	44023050	3.22597e-06	18.8534
Ca7	14667801	14667900	2.72969e-16	-36.8376								Ca5	44137151	44137250	1.77413e-05	19.6144
Ca7	15066851	15066950	1.56006e-11	-28.5112								Ca5	44287701	44287850	5.03647e-08	21.2112
Ca7	15108051	15108200	1.81905e-06	-28.3796								Ca5	44397051	44397200	3.55107e-07	18.3081
Ca7	15108151	15108300	1.56394e-08	-32.179								Ca5	44493851	44493950	2.08503e-05	16.7954
Ca7	15121551	15121650	1.77715e-08	-30.2236								Ca5	44503351	44503450	1.25424e-07	21.5317
Ca7	15127551	15127650	5.72141e-11	-32.3611								Ca5	44509101	44509200	5.88603e-07	15.3946
Ca7	15752251	15752400	1.25137e-11	-29.2124								Ca5	44697301	44697400	2.43885e-05	23.7899
Ca7	15820301	15820400	1.64488e-09	-26.5899								Ca5	44704001	44704100	2.97344e-07	15.3301
Ca7	15961751	15961850	1.30905e-06	-25.641								Ca5	44944201	44944350	6.35346e-08	22.3201
Ca7	16409951	16410050	2.70684e-08	-36.8566								Ca5	45084401	45084500	1.03532e-07	24.457
Ca7	16741651	16741750	8.30886e-06	-28.3929								Ca5	45106551	45106650	4.10779e-08	17.8663
Ca7	17117301	17117400	9.67609e-07	-26.3689								Ca5	45116301	45116450	5.75209e-07	18.0501
Ca7	17234801	17234900	1.56814e-07	-28.863								Ca5	45293601	45293700	4.11221e-06	15.3033
Ca7	17783701	17783800	1.57502e-09	-29.8224								Ca5	45363551	45363650	1.37358e-05	16.4349
Ca7	17907251	17907350	6.39257e-12	-29.1153								Ca5	45474651	45474750	1.05085e-07	15.2566
Ca7	17907501	17907600	2.63995e-07	-31.2006								Ca5	45669401	45669500	6.68925e-07	19.6274
Ca7	19841001	19841100	6.25425e-07	-27.4568								Ca5	45724801	45724900	4.89042e-08	25.1663
Ca7	19985951	19986100	5.80877e-12	-32.8287								Ca5	46071551	46071650	2.12077e-07	15.8134
Ca7	19986051	19986200	7.92262e-26	-41.7056								Ca5	46078851	46078950	1.28108e-05	20.0086
Ca7	20159451	20159550	1.88776e-06	-26.1344								Ca5	46122101	46122250	2.04401e-09	19.8049
Ca7	20497151	20497300	1.33308e-07	-28.2102								Ca5	46180901	46181000	5.57604e-06	16.7944
Ca7	20527401	20527500	2.37598e-09	-29.572								Ca5	46206351	46206450	3.45202e-15	43.1519
Ca7	20536951	20537100	5.89534e-08	-31.1242								Ca5	46237351	46237450	7.90174e-08	19.4557
[truncated: 1,086 more rows]
