# Supplementary material for: Unravelling Differential DNA Methylation Patterns in Genotype Dependent Manner under Salinity Stress Response in Chickpea
Source: Int J Mol Sci. 2023 Jan 18;24(3):1863. doi: 10.3390/ijms24031863 (PMC9915442; doi:10.3390/ijms24031863)
Supplement: Supplementary file 1 [file ijms-24-01863-s001.zip › Supplementary Table S4.xlsx]

## Sheet: SSc-s-DEG
test_id	log2 fold change	p_value	DEG
XLOC_000008	-inf	5e-05	down
XLOC_000107	-0.720203	0.01925	down
XLOC_000210	-1.00469	0.0015	down
XLOC_000213	-0.930797	0.0227	down
XLOC_000230	-0.867502	0.0033	down
XLOC_000231	-0.582335	0.0384	down
XLOC_000245	1.05744	0.00925	up
XLOC_000252	-1.89183	0.0066	down
XLOC_000256	-0.825729	0.02465	down
XLOC_000343	1.28915	0.0009	up
XLOC_000346	1.06292	0.0103	up
XLOC_000430	-1.62364	5e-05	down
XLOC_000499	-0.830607	0.03535	down
XLOC_000523	-0.769772	0.0054	down
XLOC_000593	-0.709983	0.04875	down
XLOC_000707	-0.963015	0.03045	down
XLOC_000830	1.76669	0.00205	up
XLOC_000938	-0.814645	0.00815	down
XLOC_000950	1.73706	0.0271	up
XLOC_000985	0.639489	0.0388	up
XLOC_001036	0.811316	0.03855	up
XLOC_001047	inf	0.0102	up
XLOC_001077	0.844304	0.0097	up
XLOC_001079	0.752444	0.02705	up
XLOC_001226	0.916902	0.0022	up
XLOC_001246	-0.813351	0.02825	down
XLOC_001263	-0.827411	0.00325	down
XLOC_001299	-1.27878	0.00015	down
XLOC_001316	0.740806	0.00855	up
XLOC_001513	0.756519	0.02375	up
XLOC_001541	0.870237	0.0035	up
XLOC_001584	1.25933	0.03945	up
XLOC_001676	0.704944	0.02035	up
XLOC_001807	-0.589872	0.03655	down
XLOC_001820	-0.760724	0.011	down
XLOC_001850	-0.785926	0.0068	down
XLOC_001851	-0.714846	0.0363	down
XLOC_001979	2.58252	0.0265	up
XLOC_002052	1.54581	0.00425	up
XLOC_002086	-1.23753	0.0085	down
XLOC_002101	-0.834047	0.03145	down
XLOC_002104	0.863077	0.0495	up
XLOC_002146	1.71117	0.00285	up
XLOC_002155	-1.07971	0.0276	down
XLOC_002164	-0.811606	0.0255	down
XLOC_002168	0.783469	0.0154	up
XLOC_002201	-1.2471	0.0001	down
XLOC_002332	0.609642	0.03045	up
XLOC_002587	0.729776	0.0178	up
XLOC_002599	-1.29833	0.01845	down
XLOC_002825	-0.762399	0.04275	down
XLOC_003113	-0.760992	0.04725	down
XLOC_003156	0.729069	0.01095	up
XLOC_003165	1.36176	0.02055	up
XLOC_003236	1.37116	0.00365	up
XLOC_003304	0.688509	0.0166	up
XLOC_003306	-inf	5e-05	down
XLOC_003309	-inf	0.03995	down
XLOC_003319	-2.22404	0.02405	down
XLOC_003366	-1.59298	0.00375	down
XLOC_003370	0.591673	0.03715	up
XLOC_003417	-1.92866	0.00295	down
XLOC_003436	1.25626	0.03865	up
XLOC_003444	1.59072	0.0059	up
XLOC_003476	-0.773774	0.04335	down
XLOC_003487	-inf	0.00135	down
XLOC_003497	-2.45044	0.0471	down
XLOC_003522	-1.36598	0.00745	down
XLOC_003561	1.1152	0.0088	up
XLOC_003562	0.96916	0.00665	up
XLOC_003599	1.48528	0.00755	up
XLOC_003822	-0.626011	0.0357	down
XLOC_003838	0.663684	0.03385	up
XLOC_003854	-0.866364	0.03145	down
XLOC_003874	-1.5604	0.00985	down
XLOC_003909	0.766638	0.0168	up
XLOC_003912	-0.668202	0.03855	down
XLOC_003930	0.711746	0.0433	up
XLOC_004001	-1.3722	0.0006	down
XLOC_004033	-1.02543	0.0062	down
XLOC_004046	-1.2552	0.0272	down
XLOC_004086	-0.877193	0.0052	down
XLOC_004136	-0.895666	0.04745	down
XLOC_004198	-2.3201	0.02485	down
XLOC_004210	-0.693283	0.03785	down
XLOC_004250	-0.659401	0.0376	down
XLOC_004272	-0.68114	0.01505	down
XLOC_004314	0.94894	0.00405	up
XLOC_004349	-1.09695	0.00045	down
XLOC_004425	-0.623226	0.04105	down
XLOC_004426	0.718956	0.01775	up
XLOC_004428	-1.75546	0.04945	down
XLOC_004429	-2.09351	0.0491	down
XLOC_004747	-1.04152	0.00145	down
XLOC_004808	-inf	0.0371	down
XLOC_004860	0.643153	0.03915	up
XLOC_004946	-0.981114	0.0108	down
XLOC_004950	-0.617539	0.0336	down
XLOC_004994	-2.37312	0.0055	down
XLOC_005027	-1.09028	0.0418	down
XLOC_005045	-0.790288	0.0134	down
XLOC_005097	1.4072	0.0405	up
XLOC_005102	1.19586	0.03605	up
XLOC_005104	-0.747004	0.0082	down
XLOC_005117	1.33146	0.00015	up
XLOC_005183	-0.883724	0.00325	down
XLOC_005246	0.658041	0.0497	up
XLOC_005255	-0.821749	0.00855	down
XLOC_005259	-0.931985	0.00125	down
XLOC_005398	-0.710542	0.0421	down
XLOC_005519	-0.98256	0.002	down
XLOC_005583	-1.99778	0.0041	down
XLOC_005609	2.78121	5e-05	up
XLOC_005634	-3.10484	0.03185	down
XLOC_005636	1.33147	0.00055	up
XLOC_005732	-0.5878	0.04515	down
XLOC_005822	-1.4886	5e-05	down
XLOC_005826	0.891017	0.0232	up
XLOC_005920	1.13692	0.0325	up
XLOC_006032	-0.823112	0.0096	down
XLOC_006034	0.778002	0.042	up
XLOC_006059	-1.59701	0.0391	down
XLOC_006180	-0.68514	0.01865	down
XLOC_006214	-0.931516	0.0033	down
XLOC_006229	0.903765	0.02895	up
XLOC_006348	-1.66642	0.00045	down
XLOC_006429	0.652761	0.0241	up
XLOC_006467	1.03477	0.0003	up
XLOC_006499	-0.762486	0.0379	down
XLOC_006534	-0.670705	0.0257	down
XLOC_006774	-0.873068	0.01665	down
XLOC_006775	-0.768373	0.00845	down
XLOC_006794	-0.768555	0.0144	down
XLOC_006809	-inf	0.0371	down
XLOC_006873	-0.615855	0.02785	down
XLOC_006886	-0.863989	0.0226	down
XLOC_006933	-1.02152	0.0138	down
XLOC_006943	1.67474	0.00025	up
XLOC_006982	-inf	0.04645	down
XLOC_006995	-0.758743	0.04065	down
XLOC_007024	0.858121	0.021	up
XLOC_007035	-0.665573	0.01915	down
XLOC_007047	-2.52732	0.00185	down
XLOC_007119	-0.640317	0.0267	down
XLOC_007158	3.25902	0.00015	up
XLOC_007179	-0.682431	0.0393	down
XLOC_007307	-1.62862	0.03585	down
XLOC_007387	-2.00865	0.0186	down
XLOC_007636	-1.0929	0.00495	down
XLOC_007710	1.50565	0.01595	up
XLOC_007739	0.945754	0.0334	up
XLOC_007776	-0.607705	0.0378	down
XLOC_007779	-1.24321	5e-05	down
XLOC_007801	-1.29179	0.0001	down
XLOC_007996	-0.891846	0.0314	down
XLOC_007998	-0.723649	0.01	down
XLOC_008004	-0.891746	0.0375	down
XLOC_008005	-0.974889	0.0068	down
XLOC_008007	-0.791956	0.0493	down
XLOC_008164	inf	0.02575	up
XLOC_008194	-2.3047	0.01975	down
XLOC_008217	1.27299	0.0218	up
XLOC_008271	-0.841177	0.0047	down
XLOC_008302	1.70487	0.034	up
XLOC_008482	-0.716292	0.02325	down
XLOC_008543	0.857706	0.025	up
XLOC_008597	1.0037	0.00275	up
XLOC_008598	-1.27045	0.02775	down
XLOC_008625	-1.13897	0.0005	down
XLOC_008810	-0.71298	0.0087	down
XLOC_008876	1.06938	0.00775	up
XLOC_009000	1.0621	0.01125	up
XLOC_009040	-inf	0.00095	down
XLOC_009055	-0.871214	0.02575	down
XLOC_009068	0.79177	0.009	up
XLOC_009090	-0.905765	0.0037	down
XLOC_009099	-1.28588	0.0005	down
XLOC_009184	-0.780797	0.0248	down
XLOC_009366	-0.637188	0.03395	down
XLOC_009389	-0.84239	0.0324	down
XLOC_009396	0.651107	0.04495	up
XLOC_009486	-0.772649	0.0277	down
XLOC_009566	0.709339	0.01115	up
XLOC_009569	-inf	0.0003	down
XLOC_009570	-1.52146	0.0342	down
XLOC_009592	0.611397	0.0365	up
XLOC_009821	-inf	0.019	down
XLOC_010021	1.19769	0.01025	up
XLOC_010153	-1.85612	0.0005	down
XLOC_010318	-1.2504	5e-05	down
XLOC_010532	-2.01119	0.00025	down
XLOC_010989	0.993032	0.0195	up
XLOC_011051	-0.927545	0.027	down
XLOC_011187	-0.822437	0.04615	down
XLOC_011193	0.581942	0.0375	up
XLOC_011194	-0.970718	0.0051	down
XLOC_011289	-3.16501	0.0229	down
XLOC_011338	-1.40801	0.0234	down
XLOC_011433	1.20859	0.0076	up
XLOC_011519	0.902256	0.0378	up
XLOC_011585	-1.09854	0.00215	down
XLOC_011719	-1.01631	0.01265	down
XLOC_011740	-0.742105	0.01345	down
XLOC_011946	0.613917	0.0323	up
XLOC_012066	1.03308	0.00155	up
XLOC_012086	-1.2483	5e-05	down
XLOC_012175	0.585599	0.0403	up
XLOC_012428	0.97448	0.00525	up
XLOC_012497	-1.26754	0.0157	down
XLOC_012535	-1.24408	0.0006	down
XLOC_012787	inf	0.0364	up
XLOC_012926	-0.691347	0.01635	down
XLOC_013121	0.807836	0.0067	up
XLOC_013160	0.782203	0.00655	up
XLOC_013285	-0.830073	0.00635	down
XLOC_013339	inf	0.01375	up
XLOC_013381	-1.21298	0.0095	down
XLOC_013534	-1.05447	0.01555	down
XLOC_013610	-0.672431	0.0212	down
XLOC_013973	-0.58424	0.04785	down
XLOC_014037	2.08125	5e-05	up
XLOC_014142	1.87771	5e-05	up
XLOC_014148	1.29507	0.02835	up
XLOC_014405	1.19248	0.0046	up
XLOC_014429	0.903846	0.00145	up
XLOC_014486	-0.651648	0.03135	down
XLOC_014689	-1.75307	0.01925	down
XLOC_014906	-0.99042	0.01105	down
XLOC_014926	-1.01314	0.0003	down
XLOC_014980	2.31145	0.03365	up
XLOC_015001	-0.588489	0.03935	down
XLOC_015058	-1.17039	0.02635	down
XLOC_015059	-1.33644	0.0031	down
XLOC_015116	-inf	0.019	down
XLOC_015167	0.688308	0.0234	up
XLOC_015313	-1.00924	0.046	down
XLOC_015344	0.64286	0.0233	up
XLOC_015355	-inf	0.00225	down
XLOC_015412	0.812918	0.00585	up
XLOC_015489	0.916867	0.02215	up
XLOC_015576	1.50745	0.02295	up
XLOC_015640	-0.930212	0.00095	down
XLOC_015651	-0.61074	0.0495	down
XLOC_015787	-1.24484	0.02035	down
XLOC_015862	-inf	5e-05	down
XLOC_015908	2.13962	0.02805	up
XLOC_015925	-2.14037	0.0116	down
XLOC_015933	-inf	0.00015	down
XLOC_015953	1.87979	0.0064	up
XLOC_015983	-0.658284	0.04985	down
XLOC_015991	inf	0.001	up
XLOC_016163	-0.973874	0.00465	down
XLOC_016171	-0.999232	0.0015	down
XLOC_016195	-1.31684	0.042	down
XLOC_016243	-inf	0.00015	down
XLOC_016266	-0.949432	0.00265	down
XLOC_016295	-0.755913	0.01955	down
XLOC_016320	-2.3928	0.0185	down
XLOC_016373	1.11352	0.00035	up
XLOC_016436	-1.18556	5e-05	down
XLOC_016643	-0.888929	0.0033	down
XLOC_016759	-1.46596	0.04745	down
XLOC_016762	-0.84729	0.0352	down
XLOC_016868	-0.80864	0.0053	down
XLOC_016968	0.694225	0.02555	up
XLOC_017000	-0.775419	0.0065	down
XLOC_017087	-0.753161	0.01475	down
XLOC_017137	-0.714696	0.02675	down
XLOC_017262	-1.50401	5e-05	down
XLOC_017265	1.28138	0.0001	up
XLOC_017275	-0.767248	0.0475	down
XLOC_017325	0.863642	0.0296	up
XLOC_017387	0.859227	0.00245	up
XLOC_017505	1.40252	5e-05	up
XLOC_017539	-2.50254	0.00995	down
XLOC_017667	1.73198	0.04195	up
XLOC_017772	-0.632012	0.0344	down
XLOC_017822	-1.65772	5e-05	down
XLOC_017854	-1.10979	0.03385	down
XLOC_017940	0.944227	0.04675	up
XLOC_017945	0.767045	0.0151	up
XLOC_017966	0.798107	0.0186	up
XLOC_018068	1.14502	0.03015	up
XLOC_018142	-2.35362	5e-05	down
XLOC_018194	-0.623729	0.0275	down
XLOC_018338	0.892767	0.0051	up
XLOC_018388	0.753265	0.01945	up
XLOC_018431	1.15875	0.0307	up
XLOC_018494	-0.59498	0.04635	down
XLOC_018609	-0.824979	0.01225	down
XLOC_018791	-1.07148	0.0337	down
XLOC_019009	-0.777835	0.03185	down
XLOC_019069	1.33457	0.0105	up
XLOC_019122	-1.37538	5e-05	down
XLOC_019143	-0.93812	0.02635	down
XLOC_019182	-0.665802	0.0171	down
XLOC_019231	-0.617458	0.04695	down
XLOC_019245	-0.832711	0.0028	down
XLOC_019282	1.1082	0.00225	up
XLOC_019310	inf	0.0102	up
XLOC_019524	0.878756	0.0153	up
XLOC_019555	1.09618	0.00165	up
XLOC_019580	-1.15665	0.0429	down
XLOC_019631	-1.1266	0.0005	down
XLOC_019702	-0.906686	0.0023	down
XLOC_019710	0.777253	0.02975	up
XLOC_019726	-1.10413	0.00015	down
XLOC_019803	-1.72699	0.0455	down
XLOC_019829	-0.819055	0.00325	down
XLOC_019832	-0.859519	0.00235	down
XLOC_019872	0.676983	0.0174	up
XLOC_019939	inf	0.0102	up
XLOC_019946	1.16452	0.03635	up
XLOC_019968	-1.09194	0.0165	down
XLOC_019983	1.90258	0.0113	up
XLOC_019995	0.761621	0.03455	up
XLOC_020048	-inf	0.0015	down
XLOC_020082	inf	5e-05	up
XLOC_020105	0.977184	0.02535	up
XLOC_020109	-1.56087	0.03775	down
XLOC_020139	-1.27317	0.0007	down
XLOC_020146	1.14047	0.04305	up
XLOC_020160	0.853798	0.0058	up
XLOC_020195	-0.630638	0.02255	down
XLOC_020212	0.763325	0.01425	up
XLOC_020298	-0.965812	0.0168	down
XLOC_020321	-1.15927	0.0004	down
XLOC_020349	-1.63702	0.0051	down
XLOC_020400	0.675687	0.02505	up
XLOC_020402	-0.5974	0.03485	down
XLOC_020446	-1.31152	0.00025	down
XLOC_020451	-1.2	0.0133	down
XLOC_020457	1.94598	5e-05	up
XLOC_020474	-0.811714	0.01105	down
XLOC_020488	0.596112	0.0324	up
XLOC_020509	-0.738894	0.0081	down
XLOC_020740	0.954786	0.01035	up
XLOC_020764	-1.27663	0.00235	down
XLOC_020859	-0.649777	0.03085	down
XLOC_020884	-0.923829	0.03235	down
XLOC_020898	-1.00743	0.02745	down
XLOC_020900	-1.1692	0.00055	down
XLOC_020915	-1.62858	0.0236	down
XLOC_020935	1.32655	0.04095	up
XLOC_020977	1.11733	5e-05	up
XLOC_021053	-0.86725	0.0041	down
XLOC_021331	-1.48436	0.04145	down
XLOC_021387	-1.30965	0.001	down
XLOC_021425	-0.761298	0.044	down
XLOC_021492	-1.09646	0.04105	down
XLOC_021539	0.72227	0.0444	up
XLOC_021547	-0.990134	0.00925	down
XLOC_021765	-1.17558	0.0001	down
XLOC_021833	0.897195	0.0205	up
XLOC_021838	-0.580244	0.0499	down
XLOC_021909	-1.22572	0.0215	down
XLOC_021922	-2.36875	0.02125	down
XLOC_021927	-1.07775	0.0005	down
XLOC_021953	-0.610006	0.04355	down
XLOC_022053	1.60391	0.00465	up
XLOC_022137	-0.998154	0.04525	down
XLOC_022189	-0.719624	0.01785	down
XLOC_022297	-1.12242	0.00035	down
XLOC_022305	-0.988723	0.0008	down
XLOC_022325	-0.814985	0.0363	down
XLOC_022376	-0.639956	0.03355	down
XLOC_022379	0.771918	0.01485	up
XLOC_022449	-0.619845	0.04415	down
XLOC_022486	-0.757834	0.02365	down
XLOC_022567	-0.8383	0.02565	down
XLOC_022588	-0.590737	0.0463	down
XLOC_022631	-0.769031	0.02855	down
XLOC_022708	1.27138	0.03735	up
XLOC_022882	0.730443	0.01425	up
XLOC_022899	-0.612097	0.04	down
XLOC_022903	-1.05963	0.04905	down
XLOC_022941	-1.02666	0.00025	down
XLOC_023022	1.0701	0.0303	up
XLOC_023184	-1.57804	5e-05	down
XLOC_023226	0.583608	0.0394	up
XLOC_023246	-0.906091	0.01695	down
XLOC_023363	-0.960194	0.01235	down
XLOC_023370	-1.24477	0.0094	down
XLOC_023405	-2.13672	0.04805	down
XLOC_023431	-1.17458	0.04255	down
XLOC_023625	1.00316	0.00155	up
XLOC_023660	-1.08154	0.01315	down
XLOC_023694	-1.01412	0.00135	down
XLOC_023704	-1.36113	0.00295	down
XLOC_023729	-1.06036	0.00155	down
XLOC_023752	-0.593106	0.03505	down
XLOC_023818	1.12291	0.0004	up
XLOC_023886	-0.634716	0.0217	down
XLOC_023897	-0.739372	0.0134	down
XLOC_023929	-1.23472	5e-05	down
XLOC_023990	0.844701	0.01515	up
XLOC_024037	-1.01752	0.03795	down
XLOC_024055	-0.7508	0.0427	down
XLOC_024061	1.27517	0.04495	up
XLOC_024240	-0.710531	0.019	down
XLOC_024434	-2.44234	5e-05	down
XLOC_024477	0.896791	0.04005	up
XLOC_024583	1.71888	0.0004	up
XLOC_024593	-0.761728	0.04455	down
XLOC_024643	-0.888347	0.0185	down
XLOC_024851	-0.740696	0.03895	down
XLOC_024960	1.31827	0.01255	up
XLOC_025032	0.722831	0.04775	up
XLOC_025034	-1.13839	0.01245	down
XLOC_025263	7.53145	0.02255	up
XLOC_025264	-1.71007	0.00305	down
XLOC_025269	-1.52799	0.00025	down
XLOC_025348	-0.662297	0.0192	down
XLOC_025559	2.10036	0.00885	up
XLOC_025937	0.780717	0.02675	up
XLOC_025945	-1.70786	0.02905	down
XLOC_025964	-inf	0.0371	down
XLOC_025966	-0.98608	0.0241	down
XLOC_025971	-1.68795	5e-05	down
XLOC_026397	-0.647124	0.02995	down
XLOC_026469	-3.73028	5e-05	down
XLOC_026530	-1.43172	0.01195	down
XLOC_026715	0.750154	0.0427	up
XLOC_026820	-0.650566	0.02935	down
XLOC_026832	4.97841	0.019	up
XLOC_026938	-1.03056	0.00225	down
XLOC_026970	inf	0.0041	up
XLOC_026982	-0.848403	0.0405	down
XLOC_027058	-1.10169	0.0398	down
XLOC_027060	-1.08937	0.00465	down
XLOC_027091	-0.748102	0.0157	down
XLOC_027231	-0.783595	0.01095	down
XLOC_027275	0.82135	0.008	up
XLOC_027433	-1.01283	0.0003	down
XLOC_027457	-inf	5e-05	down
XLOC_027500	-inf	0.04645	down
XLOC_027654	-1.20135	0.01205	down
XLOC_027726	-1.37882	0.02985	down
XLOC_027869	inf	0.0102	up
XLOC_028021	0.619405	0.04525	up
XLOC_028102	-0.886504	0.00725	down
XLOC_028234	-1.79434	0.02025	down
XLOC_028399	-1.21873	0.00355	down
XLOC_028596	-0.746425	0.01335	down
XLOC_028902	-0.861295	0.0152	down
XLOC_028923	-inf	0.0489	down
XLOC_029065	-inf	0.03995	down
XLOC_029272	-1.00558	0.0244	down
XLOC_029366	0.744723	0.0434	up
XLOC_029670	-1.15016	0.0493	down
XLOC_029807	-2.68196	0.0449	down
XLOC_029809	-inf	5e-05	down
XLOC_029932	inf	0.00225	up
XLOC_029958	-1.86465	0.00085	down
XLOC_030061	-0.677002	0.0169	down
XLOC_030148	inf	0.02575	up
XLOC_030164	-inf	0.0006	down
XLOC_030212	0.834653	0.00795	up
XLOC_030250	-0.98641	0.00265	down
XLOC_030377	-inf	0.04645	down
XLOC_030510	-2.41854	0.03215	down

## Sheet: STc-s-DEG
test_id	log2 fold change	p_value	DEG
XLOC_000003	-inf	5e-05	down
XLOC_000008	3.22286	0.0175	up
XLOC_000045	1.76948	0.02915	up
XLOC_000101	-3.17994	0.0002	down
XLOC_000202	1.05607	0.0034	up
XLOC_000214	0.815697	0.0099	up
XLOC_000245	1.47794	0.00395	up
XLOC_000246	inf	0.00035	up
XLOC_000300	0.79504	0.0139	up
XLOC_000343	2.15704	5e-05	up
XLOC_000364	0.694542	0.0418	up
XLOC_000371	1.27155	0.03255	up
XLOC_000430	-1.26543	0.0001	down
XLOC_000431	-0.736189	0.0285	down
XLOC_000454	1.22488	0.00025	up
XLOC_000458	0.794688	0.03575	up
XLOC_000501	0.975351	0.0027	up
XLOC_000513	-0.827133	0.04035	down
XLOC_000582	0.922346	0.0075	up
XLOC_000592	-0.673409	0.0284	down
XLOC_000593	-0.877722	0.0126	down
XLOC_000681	1.00986	0.0006	up
XLOC_000783	0.765814	0.01325	up
XLOC_000826	0.681403	0.03095	up
XLOC_000830	1.50513	0.0147	up
XLOC_000872	1.01492	0.02055	up
XLOC_000910	1.18423	0.0022	up
XLOC_000950	3.00546	5e-05	up
XLOC_000985	0.847921	0.00845	up
XLOC_001032	1.03509	0.00185	up
XLOC_001055	-0.602282	0.04505	down
XLOC_001062	-0.623357	0.03655	down
XLOC_001071	0.815505	0.02065	up
XLOC_001077	0.905023	0.00825	up
XLOC_001079	1.60305	0.0006	up
XLOC_001096	-0.639419	0.0405	down
XLOC_001141	0.966277	0.0087	up
XLOC_001226	1.29501	5e-05	up
XLOC_001230	inf	0.0001	up
XLOC_001231	inf	5e-05	up
XLOC_001246	-0.811512	0.04205	down
XLOC_001262	0.849531	0.0149	up
XLOC_001293	inf	0.02215	up
XLOC_001368	-1.08376	0.03495	down
XLOC_001445	-1.12711	0.01145	down
XLOC_001481	1.00067	0.01955	up
XLOC_001482	-0.753289	0.0396	down
XLOC_001509	0.804461	0.02845	up
XLOC_001541	0.651059	0.0364	up
XLOC_001587	0.79091	0.0103	up
XLOC_001617	-inf	0.0078	down
XLOC_001631	0.653447	0.04445	up
XLOC_001641	0.716562	0.0191	up
XLOC_001687	-0.867056	0.032	down
XLOC_001699	-2.79981	0.01835	down
XLOC_001723	1.68829	0.0266	up
XLOC_001791	2.60968	0.0221	up
XLOC_001807	1.07009	0.0014	up
XLOC_001820	-0.636607	0.0409	down
XLOC_001895	0.597711	0.0464	up
XLOC_001900	0.73533	0.01495	up
XLOC_001983	-1.18849	0.0352	down
XLOC_002039	0.868288	0.01065	up
XLOC_002048	1.08344	0.0007	up
XLOC_002054	2.16246	0.0159	up
XLOC_002059	0.792498	0.0278	up		1.5	0.584963
XLOC_002070	1.03107	0.02705	up
XLOC_002086	-0.993136	0.02425	down
XLOC_002101	-0.891255	0.0444	down
XLOC_002177	1.09231	0.00335	up
XLOC_002234	-0.58828	0.04065	down
XLOC_002247	-1.80901	0.001	down
XLOC_002284	-1.10861	0.03595	down
XLOC_002332	0.746554	0.0147	up
XLOC_002379	0.660253	0.0481	up
XLOC_002415	-0.655557	0.03865	down
XLOC_002479	1.00763	0.0342	up
XLOC_002483	0.976676	0.0039	up
XLOC_002500	-0.714306	0.0256	down
XLOC_002526	-0.766603	0.0124	down
XLOC_002533	0.820474	0.01005	up
XLOC_002548	inf	0.031	up
XLOC_002563	-0.768073	0.0288	down
XLOC_002599	1.3666	0.00155	up
XLOC_002612	0.714907	0.02395	up
XLOC_002614	0.718771	0.0378	up
XLOC_002651	0.991721	0.0013	up
XLOC_002664	0.596382	0.04815	up
XLOC_002667	2.48471	0.012	up
XLOC_002778	-0.585978	0.0429	down
XLOC_002790	1.9653	0.0454	up
XLOC_002825	0.738867	0.04875	up
XLOC_002826	0.767825	0.03675	up
XLOC_003078	1.10355	0.00415	up
XLOC_003113	1.02107	0.0101	up
XLOC_003165	-1.58608	0.00125	down
XLOC_003172	1.80353	5e-05	up
XLOC_003236	1.58383	0.00655	up
XLOC_003256	0.881097	0.01145	up
XLOC_003312	1.17489	0.0023	up
XLOC_003373	1.62021	0.0383	up
XLOC_003421	0.880669	0.02605	up
XLOC_003444	1.07966	0.0498	up
XLOC_003482	inf	5e-05	up
XLOC_003487	inf	0.00235	up
XLOC_003500	inf	5e-05	up
XLOC_003520	inf	0.01575	up
XLOC_003562	0.74229	0.04995	up
XLOC_003629	-0.960522	0.00455	down
XLOC_003640	0.99533	0.00165	up
XLOC_003643	-1.61865	0.00015	down
XLOC_003651	0.863486	0.00965	up
XLOC_003729	1.99707	0.0236	up
XLOC_003818	0.774341	0.0356	up
XLOC_003843	0.784745	0.0238	up
XLOC_003864	-0.793453	0.036	down
XLOC_003874	1.12743	0.0196	up
XLOC_003930	0.679503	0.04435	up
XLOC_004003	1.7711	0.04895	up
XLOC_004045	-0.843914	0.00515	down
XLOC_004086	0.627665	0.0443	up
XLOC_004135	0.738345	0.02975	up
XLOC_004210	-0.751598	0.0419	down
XLOC_004226	0.627544	0.04055	up
XLOC_004250	0.874879	0.03275	up
XLOC_004252	0.953323	0.0073	up
XLOC_004272	-0.602825	0.04515	down
XLOC_004286	0.798896	0.0118	up
XLOC_004314	1.0575	0.0039	up
XLOC_004337	0.716116	0.03825	up
XLOC_004349	-0.894922	0.00545	down
XLOC_004383	0.702925	0.0286	up
XLOC_004392	0.763487	0.01815	up
XLOC_004411	0.937079	0.0169	up
XLOC_004427	1.17851	0.0003	up
XLOC_004492	-1.07869	0.00145	down
XLOC_004513	0.852363	0.0071	up
XLOC_004649	0.867277	0.0236	up
XLOC_004655	1.14246	5e-05	up
XLOC_004666	1.20773	0.0243	up
XLOC_004701	1.63066	0.02845	up
XLOC_004702	1.83574	0.0006	up
XLOC_004767	-1.17797	0.0323	down
XLOC_004773	0.605671	0.0446	up
XLOC_004986	1.20281	0.0352	up
XLOC_005205	-inf	0.01545	down
XLOC_005259	-0.710572	0.0233	down
XLOC_005290	0.999027	0.0209	up
XLOC_005407	-0.924949	0.0092	down
XLOC_005445	0.634554	0.0332	up
XLOC_005463	0.863188	0.0036	up
XLOC_005474	0.804364	0.0118	up
XLOC_005493	inf	0.01575	up
XLOC_005519	0.91553	0.01205	up
XLOC_005541	0.849142	0.0065	up
XLOC_005568	0.771886	0.0239	up
XLOC_005577	-1.16458	0.0282	down
XLOC_005602	-0.672094	0.03645	down
XLOC_005609	1.32829	5e-05	up
XLOC_005658	0.782516	0.016	up
XLOC_005754	0.780279	0.01935	up
XLOC_005785	-1.19003	0.0007	down
XLOC_005859	-1.20663	0.023	down
XLOC_005898	0.909392	0.0118	up
XLOC_005916	-1.62257	0.02865	down
XLOC_005991	-1.33498	0.0003	down
XLOC_006026	1.20555	0.02	up
XLOC_006083	-0.622708	0.0481	down
XLOC_006163	-0.826129	0.0063	down
XLOC_006214	0.696295	0.0249	up
XLOC_006297	2.39952	0.00045	up
XLOC_006419	1.19793	0.03235	up
XLOC_006460	0.78159	0.0175	up
XLOC_006467	1.46899	5e-05	up
XLOC_006531	0.825763	0.00695	up
XLOC_006533	1.6519	0.0212	up
XLOC_006583	-0.938622	0.01705	down
XLOC_006774	-0.959446	0.02265	down
XLOC_006858	0.685706	0.0423	up
XLOC_006872	0.79625	0.01725	up
XLOC_006995	-0.916758	0.0103	down
XLOC_007136	0.784546	0.01775	up
XLOC_007158	5.60505	5e-05	up
XLOC_007206	0.843998	0.04725	up
XLOC_007258	0.726624	0.01485	up
XLOC_007268	0.643504	0.03135	up
XLOC_007280	1.4	0.04635	up
XLOC_007328	1.08454	0.0012	up
XLOC_007334	1.19638	0.00065	up
XLOC_007357	-1.27484	0.02035	down
XLOC_007401	inf	0.0295	up
XLOC_007405	-1.25081	0.00035	down
XLOC_007419	1.20958	0.0194	up
XLOC_007597	1.45864	5e-05	up
XLOC_007649	1.07084	0.00185	up
XLOC_007687	0.614682	0.04365	up
XLOC_007739	1.2554	0.0199	up
XLOC_007803	0.81897	0.01485	up
XLOC_008001	0.751918	0.04535	up
XLOC_008005	0.956475	0.0076	up
XLOC_008015	0.871258	0.0188	up
XLOC_008039	-1.85094	0.01895	down
XLOC_008048	1.50304	0.0048	up
XLOC_008095	0.757404	0.01125	up
XLOC_008120	0.82513	0.01785	up
XLOC_008121	-0.775712	0.0424	down
XLOC_008155	2.63356	0.0157	up
XLOC_008201	1.09019	0.04475	up
XLOC_008214	0.697213	0.0361	up
XLOC_008334	-1.88959	0.0324	down
XLOC_008376	-inf	0.0078	down
XLOC_008404	0.873277	0.00785	up
XLOC_008449	-0.658096	0.0239	down
XLOC_008482	0.696749	0.04685	up
XLOC_008543	-1.06348	0.0146	down
XLOC_008546	1.08091	0.00285	up
XLOC_008570	0.83481	0.0086	up
XLOC_008572	0.930272	0.0031	up
XLOC_008582	0.834776	0.0426	up
XLOC_008593	3.38276	0.00075	up
XLOC_008642	0.652276	0.03535	up
XLOC_008666	0.894996	0.00365	up
XLOC_008671	1.00992	0.01345	up
XLOC_008751	0.69516	0.0437	up
XLOC_008779	1.84618	0.0292	up
XLOC_008813	0.771049	0.0129	up
XLOC_008843	-1.4732	0.0487	down
XLOC_008871	0.847794	0.01415	up
XLOC_008987	0.870647	0.0288	up
XLOC_009021	0.9615	0.0057	up
XLOC_009030	inf	0.00915	up
XLOC_009041	1.08923	0.00155	up
XLOC_009044	0.781528	0.0188	up
XLOC_009048	-0.647608	0.02695	down
XLOC_009049	-0.642478	0.02805	down
XLOC_009068	0.732537	0.01975	up
XLOC_009147	0.891273	0.0169	up
XLOC_009169	0.820179	0.0166	up
XLOC_009285	-1.96621	0.0071	down
XLOC_009324	0.755038	0.0171	up
XLOC_009358	1.29602	0.00125	up
XLOC_009389	-1.24849	0.0006	down
XLOC_009415	0.889264	0.01035	up
XLOC_009436	2.32079	5e-05	up
XLOC_009451	-1.44111	0.00185	down
XLOC_009514	0.764003	0.05	up
XLOC_009536	1.81741	5e-05	up
XLOC_009558	-1.23279	0.00015	down
XLOC_009634	0.868374	0.01195	up
XLOC_009649	-0.766192	0.0172	down
XLOC_009693	0.900696	0.00585	up
XLOC_009711	0.794881	0.02895	up
XLOC_009886	-1.19693	0.0274	down
XLOC_009890	0.713563	0.0338	up
XLOC_009920	0.721013	0.045	up
XLOC_009930	-inf	0.0078	down
XLOC_009931	1.28059	5e-05	up
XLOC_009987	-0.778234	0.01315	down
XLOC_009988	-1.03434	0.00525	down
XLOC_010022	0.592321	0.0425	up
XLOC_010154	-1.0561	0.0016	down
XLOC_010235	-0.813954	0.00655	down
XLOC_010296	0.986202	0.0178	up
XLOC_010313	-0.928315	0.00935	down
XLOC_010318	-0.672419	0.02225	down
XLOC_010390	-inf	0.0108	down
XLOC_010393	-0.749769	0.03105	down
XLOC_010427	1.25159	0.0431	up
XLOC_010506	2.34893	0.0419	up
XLOC_010558	0.783358	0.0227	up
XLOC_010585	1.09647	0.03535	up
XLOC_010603	0.661422	0.02645	up
XLOC_010612	-inf	0.0315	down
XLOC_010695	0.985493	0.0022	up
XLOC_010697	-1.07796	0.0345	down
XLOC_010718	-1.54035	0.01055	down
XLOC_010737	-2.24583	0.0229	down
XLOC_010761	-0.828427	0.01115	down
XLOC_010770	1.68395	0.0436	up
XLOC_010771	0.763947	0.0382	up
XLOC_010814	1.31423	0.002	up
XLOC_010881	4.03335	0.00795	up
XLOC_010891	0.724744	0.02165	up
XLOC_010965	0.923101	0.0225	up
XLOC_010989	1.50879	0.0004	up
XLOC_010994	1.24126	0.04985	up
XLOC_011072	0.686661	0.02565	up
XLOC_011080	0.852153	0.01065	up
XLOC_011196	1.15053	0.0007	up
XLOC_011301	1.041	0.0406	up
XLOC_011303	-0.875315	0.0384	down
XLOC_011365	-1.44603	0.00045	down
XLOC_011376	-0.60619	0.04245	down
XLOC_011482	0.711666	0.0261	up
XLOC_011486	1.29081	0.031	up
XLOC_011508	1.09099	0.04195	up
XLOC_011542	0.667098	0.02385	up
XLOC_011585	-1.01461	0.00555	down
XLOC_011596	1.33023	0.01975	up
XLOC_011670	0.96863	0.0424	up
XLOC_011745	0.851893	0.0078	up
XLOC_011846	0.806112	0.0226	up
XLOC_011886	1.00899	0.0085	up
XLOC_011889	inf	5e-05	up
XLOC_011946	0.836444	0.00745	up
XLOC_011998	-0.8108	0.0389	down
XLOC_012058	1.26845	0.01165	up
XLOC_012068	0.958897	0.0363	up
XLOC_012108	0.990705	0.0041	up
XLOC_012224	-1.63772	0.0102	down
XLOC_012229	0.638263	0.0301	up
XLOC_012276	0.811144	0.0254	up
XLOC_012285	1.25313	0.001	up
XLOC_012289	-0.884442	0.00515	down
XLOC_012315	0.678392	0.0452	up
XLOC_012428	-1.30741	0.001	down
XLOC_012450	-inf	0.0042	down
XLOC_012497	-1.02549	0.0381	down
XLOC_012502	2.00409	0.049	up
XLOC_012573	0.961614	0.03005	up
XLOC_012577	-2.38082	0.0288	down
XLOC_012585	-inf	5e-05	down
XLOC_012593	0.684129	0.03025	up
XLOC_012744	-0.612721	0.0401	down
XLOC_012832	0.713509	0.0276	up
XLOC_012963	-1.4385	0.0346	down
XLOC_013016	1.14649	0.03155	up
XLOC_013121	0.728006	0.01675	up
XLOC_013190	1.09822	0.0133	up
XLOC_013215	-1.35733	0.0401	down
XLOC_013223	-1.48648	0.0011	down
XLOC_013255	0.774807	0.04595	up
XLOC_013276	1.27018	0.0006	up
XLOC_013282	1.03443	0.0118	up
XLOC_013285	-1.35315	5e-05	down
XLOC_013312	1.37887	0.01055	up
XLOC_013377	-0.831903	0.0181	down
XLOC_013378	0.855394	0.0307	up
XLOC_013381	1.55207	0.00185	up
XLOC_013422	1.34918	0.0248	up
XLOC_013434	0.809199	0.00995	up
XLOC_013478	-inf	0.02445	down
XLOC_013486	1.46147	0.0205	up
XLOC_013517	0.990752	0.0046	up
XLOC_013548	1.27976	0.0009	up
XLOC_013599	0.764479	0.0404	up
XLOC_013631	0.948626	0.00535	up
XLOC_013649	0.624194	0.0421	up
XLOC_013659	0.762043	0.02955	up
XLOC_013663	0.708056	0.03005	up
XLOC_013787	0.705837	0.026	up
XLOC_013790	-1.52621	0.0361	down
XLOC_013797	0.677017	0.0289	up
XLOC_013798	1.01567	0.0451	up
XLOC_013921	0.64858	0.04905	up
XLOC_014050	1.50859	0.01165	up
XLOC_014059	-1.00257	0.0129	down
XLOC_014071	1.61729	5e-05	up
XLOC_014110	-1.26437	0.01115	down
XLOC_014176	-0.996488	0.00715	down
XLOC_014278	inf	0.02215	up
XLOC_014282	1.261	0.02825	up
XLOC_014314	0.804039	0.0401	up
XLOC_014356	0.636658	0.03955	up
XLOC_014382	5.08894	0.0167	up
XLOC_014430	-0.860225	0.00415	down
XLOC_014431	1.12013	0.0029	up
XLOC_014718	1.01801	0.01385	up
XLOC_014721	0.881313	0.02695	up
XLOC_014745	0.853025	0.04645	up
XLOC_014750	0.60516	0.04865	up
XLOC_014765	0.845934	0.01085	up
XLOC_014906	0.692742	0.04195	up
XLOC_014980	3.52049	0.02285	up
XLOC_015008	0.838072	0.02015	up
XLOC_015172	-0.922121	0.0232	down
XLOC_015278	0.652582	0.0294	up
XLOC_015284	0.620916	0.04475	up
XLOC_015291	-0.893633	0.0051	down
XLOC_015334	-inf	0.02445	down
XLOC_015344	0.88275	0.00705	up
XLOC_015394	0.75351	0.0143	up
XLOC_015429	-1.02546	0.00315	down
XLOC_015519	-1.04833	0.0222	down
XLOC_015520	0.823163	0.02185	up
XLOC_015554	0.809777	0.0089	up
XLOC_015567	0.874275	0.00775	up
XLOC_015569	1.54779	0.00015	up
XLOC_015643	-0.622433	0.0446	down
XLOC_015687	1.50904	5e-05	up
XLOC_015736	1.09797	0.00415	up
XLOC_015751	-0.706283	0.0171	down
XLOC_015798	0.80837	0.0344	up
XLOC_015858	1.02207	0.04635	up
XLOC_015869	-1.18624	0.0495	down
XLOC_015877	-0.627811	0.029	down
XLOC_015879	1.77417	0.00025	up
XLOC_015930	-inf	0.0108	down
XLOC_015975	0.896016	0.0131	up
XLOC_015979	1.66183	0.00345	up
XLOC_016003	2.22926	0.03655	up
XLOC_016006	0.691668	0.0197	up
XLOC_016042	0.777199	0.0121	up
XLOC_016055	0.741655	0.0437	up
XLOC_016058	0.953259	0.00185	up
XLOC_016083	0.961393	0.00945	up
XLOC_016084	0.722998	0.01455	up
XLOC_016111	-1.15579	0.012	down
XLOC_016121	0.714817	0.0285	up
XLOC_016154	0.712489	0.01435	up
XLOC_016201	0.69244	0.02025	up
XLOC_016209	0.689366	0.0357	up
XLOC_016215	0.64393	0.02195	up
XLOC_016262	1.24847	0.0231	up
XLOC_016296	0.877011	0.01165	up
XLOC_016373	-0.708855	0.0284	down
XLOC_016436	-0.809988	0.0178	down
XLOC_016458	0.696653	0.0308	up
XLOC_016461	0.626397	0.0456	up
XLOC_016542	0.604265	0.0403	up
XLOC_016562	-0.678721	0.04895	down
XLOC_016596	0.809703	0.0319	up
XLOC_016643	-0.932087	0.0026	down
XLOC_016731	1.28697	0.0008	up
XLOC_016736	0.736959	0.02585	up
XLOC_016760	-0.771863	0.01135	down
XLOC_016793	-0.958929	0.04275	down
XLOC_016837	0.788888	0.0092	up
XLOC_016861	0.615314	0.0387	up
XLOC_016896	0.627463	0.04035	up
XLOC_016988	0.630418	0.0413	up
XLOC_016995	1.17514	0.0008	up
XLOC_017026	0.924862	0.02575	up
XLOC_017030	0.810939	0.01105	up
XLOC_017078	0.791887	0.03365	up
XLOC_017092	1.35057	0.00045	up
XLOC_017138	1.72739	0.03545	up
XLOC_017173	0.882461	0.0043	up
XLOC_017180	2.18619	0.02815	up
XLOC_017182	0.683772	0.0213	up
XLOC_017201	-0.963066	0.01045	down
XLOC_017203	1.07794	0.001	up
XLOC_017210	2.19729	5e-05	up
XLOC_017262	0.986869	0.0033	up
XLOC_017272	0.825107	0.00925	up
XLOC_017275	-1.21457	0.00845	down
XLOC_017324	0.962452	0.0035	up
XLOC_017326	-0.853019	0.0161	down
XLOC_017389	1.06138	0.02125	up
XLOC_017483	-inf	0.0063	down
XLOC_017505	1.88612	5e-05	up
XLOC_017558	0.850939	0.03705	up
XLOC_017627	0.809928	0.00915	up
XLOC_017631	-1.01825	0.0381	down
XLOC_017696	-0.984875	0.0067	down
XLOC_017806	-1.16424	0.01545	down
XLOC_017867	2.01622	0.00015	up
XLOC_017929	2.04325	0.03475	up
XLOC_017945	1.29663	0.0001	up
XLOC_017978	-1.34056	0.006	down
XLOC_018041	0.998043	0.0081	up
XLOC_018047	-1.17192	0.00135	down
XLOC_018142	-2.18667	5e-05	down
XLOC_018167	0.672063	0.03735	up
XLOC_018196	-1.54684	0.02095	down
XLOC_018259	-1.28369	0.02145	down
XLOC_018299	5.44949	5e-05	up
XLOC_018336	0.689329	0.04325	up
XLOC_018338	0.816804	0.02725	up
XLOC_018405	0.665817	0.0484	up
XLOC_018429	-1.03709	0.02295	down
XLOC_018438	1.37457	0.00615	up
XLOC_018470	-1.09243	0.0021	down
XLOC_018510	0.814575	0.0137	up
XLOC_018515	2.15695	0.01135	up
XLOC_018604	2.42208	0.0208	up
XLOC_018608	0.901626	0.0019	up
XLOC_018612	1.15102	0.03085	up
XLOC_018624	2.00677	0.0002	up
XLOC_018820	1.27075	0.00105	up
XLOC_018833	2.69351	0.0011	up
XLOC_018878	-1.08662	0.00905	down
XLOC_019009	-0.863088	0.0352	down
XLOC_019025	0.843376	0.00875	up
XLOC_019026	0.997111	0.00125	up
XLOC_019067	0.714762	0.03925	up
XLOC_019102	0.623702	0.03475	up
XLOC_019126	-0.918191	0.0069	down
XLOC_019155	-1.20624	0.0002	down
XLOC_019298	-2.73936	0.0459	down
XLOC_019339	inf	5e-05	up
XLOC_019340	0.942378	0.01005	up
XLOC_019555	0.860873	0.00725	up
XLOC_019587	0.965276	0.00215	up
XLOC_019625	1.11584	0.0004	up
XLOC_019631	-1.11003	0.00745	down
XLOC_019692	-1.34265	0.01555	down
XLOC_019702	0.703274	0.0209	up
XLOC_019720	-1.30404	0.0303	down
XLOC_019743	-0.794371	0.0353	down
XLOC_019793	-1.60545	0.043	down
XLOC_019820	1.14812	0.00055	up
XLOC_019829	-0.746829	0.01285	down
XLOC_019841	0.829267	0.0214	up
XLOC_019945	1.11514	0.031	up
XLOC_019955	0.631558	0.04365	up
XLOC_019966	3.4364	0.01685	up
XLOC_019971	-1.66175	0.03145	down
XLOC_019975	0.934605	0.0312	up
XLOC_019995	-1.75345	0.00025	down
XLOC_019999	-3.51219	0.04475	down
XLOC_020019	-0.753786	0.01925	down
XLOC_020024	-1.84867	0.0302	down
XLOC_020046	-0.643645	0.04715	down
XLOC_020059	2.76294	5e-05	up
XLOC_020076	1.0605	0.03515	up
XLOC_020077	2.54775	0.03995	up
XLOC_020101	1.57499	5e-05	up
XLOC_020139	0.856428	0.02585	up
XLOC_020147	-1.23626	0.01585	down
XLOC_020153	inf	5e-05	up
XLOC_020168	inf	0.01575	up
XLOC_020212	2.07976	5e-05	up
XLOC_020245	0.987009	0.0011	up
XLOC_020252	1.19644	0.00955	up
XLOC_020290	-1.68335	0.03585	down
XLOC_020291	1.03696	0.0048	up
XLOC_020298	0.756367	0.0425	up
XLOC_020302	0.883246	0.03155	up
XLOC_020310	1.88281	0.0339	up
XLOC_020327	-1.10594	0.014	down
XLOC_020339	0.920428	0.0044	up
XLOC_020390	-0.672063	0.0286	down
XLOC_020399	0.782279	0.0175	up
XLOC_020408	-0.754094	0.02645	down
XLOC_020447	0.631568	0.0391	up
XLOC_020457	-1.11643	0.00045	down
XLOC_020466	-0.791426	0.01035	down
XLOC_020488	0.756746	0.01865	up
XLOC_020520	0.730182	0.0182	up
XLOC_020687	0.585709	0.04115	up
XLOC_020749	0.840864	0.0049	up
XLOC_020759	0.756024	0.01775	up
XLOC_020764	0.765024	0.0469	up
XLOC_020850	0.913504	0.00535	up
XLOC_020859	0.766462	0.017	up
XLOC_020873	-0.648208	0.0306	down
XLOC_020892	-0.783928	0.03075	down
XLOC_020915	-1.1716	0.0497	down
XLOC_020946	1.59667	5e-05	up
XLOC_020977	0.842491	0.0042	up
XLOC_021053	-0.748097	0.01305	down
XLOC_021082	0.639732	0.03275	up
XLOC_021184	2.24392	5e-05	up
XLOC_021350	0.652045	0.0273	up
XLOC_021415	-1.20089	0.0003	down
XLOC_021420	1.10375	0.04395	up
XLOC_021486	inf	0.006	up
XLOC_021539	-0.711626	0.0374	down
XLOC_021625	1.45243	0.0038	up
XLOC_021652	1.60368	0.02	up
XLOC_021732	-0.640687	0.04465	down
XLOC_021765	-1.26491	5e-05	down
XLOC_021797	-0.82732	0.00615	down
XLOC_021833	1.61155	0.0037	up
XLOC_021842	0.729167	0.01465	up
XLOC_021846	1.00494	0.0146	up
XLOC_021847	1.85481	5e-05	up
XLOC_021899	-1.11013	0.04215	down
XLOC_021916	0.639139	0.04705	up
XLOC_021933	1.05458	0.04945	up
XLOC_021943	-1.62566	0.002	down
XLOC_021984	2.6219	5e-05	up
XLOC_021996	0.794494	0.02845	up
XLOC_022020	0.973835	0.00405	up
XLOC_022189	0.815713	0.01185	up
XLOC_022196	0.795441	0.01355	up
XLOC_022199	-0.857213	0.0063	down
XLOC_022253	0.958881	0.003	up
XLOC_022276	-0.87509	0.00785	down
XLOC_022379	0.646991	0.04785	up
XLOC_022398	1.25674	0.0083	up
XLOC_022404	0.960254	0.0332	up
XLOC_022418	-0.799831	0.01095	down
XLOC_022445	0.649471	0.02745	up
XLOC_022537	-0.633414	0.03455	down
XLOC_022683	0.813413	0.00985	up
XLOC_022688	-inf	5e-05	down
XLOC_022710	0.74851	0.0291	up
XLOC_022714	-0.703867	0.0405	down
XLOC_022718	-0.8698	0.02545	down
XLOC_022725	-inf	0.00505	down
XLOC_022779	1.51829	0.02685	up
XLOC_022825	-1.27393	0.02435	down
XLOC_022878	0.672679	0.02595	up
XLOC_022882	0.663339	0.0349	up
XLOC_022889	-1.53028	0.03	down
XLOC_022941	-1.3072	0.0007	down
XLOC_022945	0.95451	0.00245	up
XLOC_022964	2.54694	0.0184	up
XLOC_022980	-0.916505	0.041	down
XLOC_022999	0.758849	0.0203	up
XLOC_023000	0.742688	0.01655	up
XLOC_023010	1.00485	0.0105	up
XLOC_023076	0.880755	0.01225	up
XLOC_023125	-1.32348	0.00135	down
XLOC_023144	-1.05279	0.0054	down
XLOC_023147	-2.16692	0.02675	down
XLOC_023157	-1.54636	0.0072	down
XLOC_023184	-2.90407	5e-05	down
XLOC_023190	0.658729	0.0394	up
XLOC_023222	inf	0.02215	up
XLOC_023261	2.62663	0.04025	up
XLOC_023440	-0.981224	0.0156	down
XLOC_023443	-2.04888	0.01235	down
XLOC_023456	3.22972	5e-05	up
XLOC_023512	0.706865	0.036	up
XLOC_023519	0.708772	0.02035	up
XLOC_023523	-1.64	0.00815	down
XLOC_023524	-1.7249	0.0094	down
XLOC_023534	0.959317	0.01935	up
XLOC_023546	0.803913	0.01655	up
XLOC_023610	2.32532	0.0015	up
XLOC_023660	0.911725	0.04025	up
XLOC_023719	0.701233	0.0331	up
XLOC_023731	0.865126	0.0149	up
XLOC_023753	0.648744	0.0319	up
XLOC_023796	-0.657766	0.0498	down
XLOC_023801	0.943584	0.0082	up
XLOC_023809	-1.03427	0.00645	down
XLOC_023812	1.41872	5e-05	up
XLOC_023818	1.00182	0.00665	up
XLOC_023820	0.717411	0.04865	up
XLOC_023929	-0.78828	0.01295	down
XLOC_023958	0.968177	0.0095	up
XLOC_023998	0.794529	0.0103	up
XLOC_024230	1.6733	0.0204	up
XLOC_024236	0.674032	0.03125	up
XLOC_024306	0.602737	0.04005	up
XLOC_024341	-inf	0.00255	down
XLOC_024375	-1.29711	0.04775	down
XLOC_024392	1.5762	0.0499	up
XLOC_024439	0.807412	0.0215	up
XLOC_024461	-0.621693	0.0439	down
XLOC_024467	-1.12623	0.0346	down
XLOC_024509	0.69061	0.0337	up
XLOC_024530	-0.687924	0.02535	down
XLOC_024544	-1.22517	0.00025	down
XLOC_024583	1.89986	0.0109	up
XLOC_024601	1.1601	0.04605	up
XLOC_024636	0.740129	0.02575	up
XLOC_024641	0.798002	0.0107	up
XLOC_024809	0.914359	0.0044	up
XLOC_024851	-0.788259	0.02275	down
XLOC_024954	-1.1217	0.04425	down
XLOC_024960	1.12673	0.0497	up
XLOC_024980	0.928265	0.00665	up
XLOC_025046	1.02428	0.03465	up
XLOC_025062	1.62167	0.044	up
XLOC_025198	-0.915539	0.0054	down
XLOC_025272	-1.08892	0.0084	down
XLOC_025305	-0.759597	0.0292	down
XLOC_025306	-2.08387	0.0221	down
XLOC_025357	inf	5e-05	up
XLOC_025358	inf	5e-05	up
XLOC_025359	inf	5e-05	up
XLOC_025373	inf	5e-05	up
XLOC_025404	-1.22668	0.0109	down
XLOC_025409	-inf	0.0078	down
XLOC_025418	-1.38126	0.00815	down
XLOC_025419	-1.33783	0.02905	down
XLOC_025521	3.51312	0.0001	up
XLOC_025524	inf	5e-05	up
XLOC_025658	-1.67248	0.0025	down
XLOC_025693	-2.00568	0.03015	down
XLOC_025696	-2.59247	0.0036	down
XLOC_025711	-3.26291	0.00455	down
XLOC_025730	0.944707	0.0218	up
XLOC_025754	0.821688	0.007	up
XLOC_025833	2.92739	0.01175	up
XLOC_025842	1.56847	5e-05	up
XLOC_025923	-0.877435	0.0186	down
XLOC_025979	1.03905	0.00255	up
XLOC_026196	-1.66021	0.0073	down
XLOC_026213	inf	0.00175	up
XLOC_026465	0.686652	0.0445	up
XLOC_026495	0.856476	0.04065	up
XLOC_026530	0.83562	0.03965	up
XLOC_026531	1.11945	0.00215	up
XLOC_026532	1.36109	0.02695	up
XLOC_026595	-inf	0.0078	down
XLOC_026673	1.59965	0.04055	up
XLOC_026716	-0.76967	0.0116	down
XLOC_026814	-0.782078	0.0225	down
XLOC_026832	2.04348	0.03655	up
XLOC_026850	-0.92957	0.01025	down
XLOC_026899	0.869448	0.00485	up
XLOC_026946	-1.79407	0.03885	down
XLOC_027020	-1.33152	0.0363	down
XLOC_027062	-1.20648	0.04855	down
XLOC_027075	0.656779	0.03235	up
XLOC_027197	inf	5e-05	up
XLOC_027215	-0.680328	0.04245	down
XLOC_027216	-0.801523	0.03365	down
XLOC_027218	-inf	0.00035	down
XLOC_027242	0.817722	0.00765	up
XLOC_027343	1.32085	0.0029	up
XLOC_027589	inf	0.006	up
XLOC_027707	0.889946	0.01055	up
XLOC_027708	0.922305	0.0081	up
XLOC_027829	0.719866	0.04345	up
XLOC_027866	-0.908731	0.01165	down
XLOC_027907	0.597836	0.04015	up
XLOC_027976	inf	5e-05	up
XLOC_028015	1.26424	0.00295	up
XLOC_028110	0.955424	0.0104	up
XLOC_028127	0.928952	0.0364	up
XLOC_028343	0.937006	0.00355	up
XLOC_028436	0.754234	0.0375	up
XLOC_028468	0.711204	0.02365	up
XLOC_028507	-0.838913	0.0315	down
XLOC_028678	0.854554	0.00725	up
XLOC_028778	-0.762773	0.02365	down
XLOC_028920	inf	5e-05	up
XLOC_029047	1.29743	0.0493	up
XLOC_029381	0.643876	0.0434	up
XLOC_029422	-0.76936	0.03955	down
XLOC_029557	2.50038	0.0188	up
XLOC_029591	-1.20964	0.02985	down
XLOC_029609	0.800283	0.01475	up
XLOC_029643	inf	0.00395	up
XLOC_030029	2.00042	0.0184	up
XLOC_030116	-1.60105	0.0065	down
XLOC_030126	2.13239	0.02385	up
XLOC_030168	0.64789	0.0355	up
XLOC_030325	0.877376	0.0194	up
XLOC_030438	-1.36044	0.0151	down
XLOC_030510	-1.31488	0.0326	down
XLOC_030521	2.71851	0.0272	up
XLOC_030601	1.16016	0.02635	up
XLOC_030634	0.885249	0.0149	up
XLOC_030635	0.610535	0.04855	up
XLOC_030637	-0.832021	0.0102	down

## Sheet: SSc-STc-DEG
test_id	log2 fold change	p_value	DEG
XLOC_000003	inf	5e-05	up
XLOC_000008	-2.95933	0.0247	down
XLOC_000107	-1.78892	5e-05	down
XLOC_000118	-0.718652	0.0186	down
XLOC_000126	-1.42875	5e-05	down
XLOC_000214	0.642266	0.04145	up
XLOC_000245	-1.04935	0.0357	down
XLOC_000260	-1.22689	0.0009	down
XLOC_000263	-0.810242	0.02345	down
XLOC_000265	-0.974909	0.03435	down
XLOC_000276	-1.27533	0.0002	down
XLOC_000277	1.01282	0.0087	up
XLOC_000300	1.07995	0.00155	up
XLOC_000343	-1.8015	0.00015	down
XLOC_000361	1.19001	0.02015	up
XLOC_000364	0.72298	0.0428	up
XLOC_000386	1.32028	0.0005	up
XLOC_000423	-1.07634	0.00035	down
XLOC_000430	-0.837891	0.00805	down
XLOC_000444	-1.36302	0.0003	down
XLOC_000458	-0.809011	0.03585	down
XLOC_000464	-0.912642	0.00395	down
XLOC_000479	-0.822936	0.03205	down
XLOC_000520	-1.4297	0.0436	down
XLOC_000523	-0.650142	0.0296	down
XLOC_000567	-0.679385	0.0282	down
XLOC_000589	inf	5e-05	up
XLOC_000592	2.15272	5e-05	up
XLOC_000648	1.23556	0.02735	up
XLOC_000653	-2.71148	0.01435	down
XLOC_000681	-0.619287	0.0369	down
XLOC_000789	-0.711714	0.02825	down
XLOC_000791	1.10881	0.0005	up
XLOC_000861	inf	0.0098	up
XLOC_000872	-1.45417	0.00135	down
XLOC_000888	-0.610491	0.0473	down
XLOC_000910	1.46064	0.00135	up
XLOC_000919	2.03904	0.04595	up
XLOC_000938	-0.660642	0.0404	down
XLOC_000954	1.64326	0.0457	up
XLOC_000971	-3.31103	0.00625	down
XLOC_000982	-0.721493	0.01545	down
XLOC_001011	1.53255	0.00755	up
XLOC_001017	0.891847	0.0099	up
XLOC_001027	1.32633	0.0194	up
XLOC_001036	0.913498	0.03725	up
XLOC_001047	inf	0.0102	up
XLOC_001055	0.972161	0.0023	up
XLOC_001064	0.668796	0.0302	up
XLOC_001069	-1.03908	0.00075	down
XLOC_001079	-1.32371	0.00475	down
XLOC_001141	-1.07763	0.0016	down
XLOC_001142	-0.946023	0.0048	down
XLOC_001173	-0.757161	0.0112	down
XLOC_001200	1.07242	0.01625	up
XLOC_001236	-0.712419	0.0191	down
XLOC_001261	-0.73962	0.04955	down
XLOC_001267	1.29047	0.00265	up
XLOC_001299	-1.89591	5e-05	down
XLOC_001300	-1.32662	5e-05	down
XLOC_001305	-0.699908	0.02055	down
XLOC_001330	1.10884	0.02095	up
XLOC_001398	-inf	0.00055	down
XLOC_001445	-0.76318	0.03965	down
XLOC_001481	-1.98945	5e-05	down
XLOC_001485	-0.99201	0.0036	down
XLOC_001496	-1.54203	0.00885	down
XLOC_001541	0.807383	0.01185	up
XLOC_001594	-inf	0.00025	down
XLOC_001619	1.06255	0.0008	up
XLOC_001653	0.598992	0.04495	up
XLOC_001723	-1.72371	0.0266	down
XLOC_001767	-inf	0.02065	down
XLOC_001820	-0.671874	0.03535	down
XLOC_001848	-0.769776	0.01705	down
XLOC_001858	1.9829	0.01345	up
XLOC_001863	-inf	5e-05	down
XLOC_001871	inf	5e-05	up
XLOC_001883	-1.1313	0.0007	down
XLOC_001893	-0.594519	0.0484	down
XLOC_001923	-0.595699	0.04485	down
XLOC_001932	-1.87749	0.0003	down
XLOC_001940	inf	5e-05	up
XLOC_001941	0.935981	0.0346	up
XLOC_001942	0.601408	0.0497	up
XLOC_001980	-inf	0.0004	down
XLOC_002048	-0.987292	0.0045	down
XLOC_002049	2.78562	0.00645	up
XLOC_002054	-2.41872	0.0089	down
XLOC_002089	0.705969	0.02245	up
XLOC_002155	-3.90092	0.0046	down
XLOC_002160	-0.679558	0.0277	down
XLOC_002161	-inf	5e-05	down
XLOC_002177	-0.922252	0.0163	down
XLOC_002186	0.777444	0.04355	up
XLOC_002192	-inf	0.03755	down
XLOC_002194	0.633137	0.03945	up
XLOC_002247	2.2269	0.00095	up
XLOC_002284	1.83257	0.00425	up
XLOC_002328	0.688804	0.0336	up
XLOC_002332	-0.916825	0.00495	down
XLOC_002357	0.947469	0.0235	up
XLOC_002380	1.06268	0.0011	up
XLOC_002413	-0.795285	0.02475	down
XLOC_002443	inf	5e-05	up
XLOC_002468	-1.04287	0.0019	down
XLOC_002470	-1.0636	0.015	down
XLOC_002564	-0.979418	0.00125	down
XLOC_002565	-0.805859	0.01805	down
XLOC_002614	0.79045	0.03175	up
XLOC_002656	-6.94464	0.02955	down
XLOC_002735	0.977435	0.0036	up
XLOC_002749	0.634152	0.02785	up
XLOC_002774	-0.749826	0.01355	down
XLOC_002793	-0.823625	0.0077	down
XLOC_002825	1.46573	0.0006	up
XLOC_002826	1.06402	0.0087	up
XLOC_002833	-1.09051	0.00235	down
XLOC_002837	0.942252	0.0026	up
XLOC_002893	-1.25548	0.0005	down
XLOC_003022	-1.29086	0.00025	down
XLOC_003042	0.893837	0.0033	up
XLOC_003066	-2.61719	0.00995	down
XLOC_003099	1.4554	0.01195	up
XLOC_003113	-1.04544	0.01315	down
XLOC_003128	-3.92999	0.00055	down
XLOC_003165	1.59714	0.0064	up
XLOC_003181	-0.884827	0.00525	down
XLOC_003194	0.648342	0.0369	up
XLOC_003238	-1.46204	5e-05	down
XLOC_003262	-0.791739	0.0078	down
XLOC_003304	-0.726496	0.02505	down
XLOC_003306	1.14468	0.00715	up
XLOC_003311	-inf	5e-05	down
XLOC_003319	-2.13096	0.01855	down
XLOC_003374	inf	5e-05	up
XLOC_003375	inf	5e-05	up
XLOC_003376	2.5043	0.00015	up
XLOC_003382	inf	5e-05	up
XLOC_003389	-2.18642	0.0312	down
XLOC_003399	-1.44193	5e-05	down
XLOC_003420	-1.10552	0.0361	down
XLOC_003421	0.869468	0.0408	up
XLOC_003425	-0.805836	0.0105	down
XLOC_003473	1.04886	0.04555	up
XLOC_003487	-inf	0.001	down
XLOC_003494	-inf	5e-05	down
XLOC_003500	-inf	5e-05	down
XLOC_003514	-1.1912	0.04445	down
XLOC_003520	-inf	5e-05	down
XLOC_003591	-0.978321	0.0017	down
XLOC_003599	1.29547	0.02515	up
XLOC_003629	1.31467	0.0001	up
XLOC_003637	2.21174	0.02355	up
XLOC_003643	2.54846	5e-05	up
XLOC_003672	-1.86539	0.00785	down
XLOC_003693	-0.679594	0.0385	down
XLOC_003726	0.972215	0.031	up
XLOC_003729	-2.10699	0.01685	down
XLOC_003805	-3.25443	5e-05	down
XLOC_003822	-1.4065	5e-05	down
XLOC_003912	1.04852	0.0026	up
XLOC_003965	-1.0824	0.0048	down
XLOC_004001	-1.77884	0.0001	down
XLOC_004015	-0.740782	0.0178	down
XLOC_004030	-1.722	0.03955	down
XLOC_004033	0.686612	0.03815	up
XLOC_004073	-1.28767	0.03705	down
XLOC_004115	0.588082	0.04475	up
XLOC_004136	-1.06976	0.02995	down
XLOC_004170	1.01538	0.01325	up
XLOC_004198	-2.12914	0.0163	down
XLOC_004250	1.63377	5e-05	up
XLOC_004289	-1.54527	0.02735	down
XLOC_004299	-0.677643	0.02675	down
XLOC_004314	-0.982737	0.0107	down
XLOC_004321	-0.74894	0.0158	down
XLOC_004332	0.951233	0.0252	up
XLOC_004360	1.06791	0.03755	up
XLOC_004361	-0.644688	0.0435	down
XLOC_004387	1.0425	0.00355	up
XLOC_004391	-0.658209	0.0287	down
XLOC_004392	-1.16271	0.00015	down
XLOC_004394	-1.25636	0.0165	down
XLOC_004463	0.658678	0.0416	up
XLOC_004492	0.835882	0.01075	up
XLOC_004522	1.24204	0.0001	up
XLOC_004578	2.10355	0.00265	up
XLOC_004583	1.71939	0.0005	up
XLOC_004747	-0.834107	0.01965	down
XLOC_004801	0.76609	0.0143	up
XLOC_004810	3.29256	5e-05	up
XLOC_004869	0.987173	0.0162	up
XLOC_004893	-0.67917	0.03195	down
XLOC_004915	-0.753888	0.03785	down
XLOC_004956	inf	0.0213	up
XLOC_004994	-1.2203	0.04345	down
XLOC_005027	-1.38246	0.01905	down
XLOC_005029	inf	0.0254	up
XLOC_005078	-0.787461	0.01545	down
XLOC_005083	0.675783	0.03015	up
XLOC_005121	-0.992132	0.0055	down
XLOC_005181	-0.873364	0.0078	down
XLOC_005183	1.11038	0.0016	up
XLOC_005191	-0.809608	0.01215	down
XLOC_005212	-0.652607	0.04105	down
XLOC_005217	-0.706303	0.0274	down
XLOC_005223	inf	5e-05	up
XLOC_005243	1.46414	0.01635	up
XLOC_005255	0.678153	0.03945	up
XLOC_005258	-0.81538	0.032	down
XLOC_005342	1.05774	0.0046	up
XLOC_005377	1.37627	0.02955	up
XLOC_005389	-1.05759	0.00515	down
XLOC_005407	-1.36958	5e-05	down
XLOC_005425	-0.778677	0.0126	down
XLOC_005439	1.31346	0.0096	up
XLOC_005459	1.411	0.02155	up
XLOC_005463	-1.01131	0.00055	down
XLOC_005470	-0.811895	0.01935	down
XLOC_005541	0.773421	0.0169	up
XLOC_005553	-0.947181	0.0368	down
XLOC_005564	-1.42127	0.0127	down
XLOC_005566	-0.959871	0.04195	down
XLOC_005577	1.0515	0.0486	up
XLOC_005583	-3.38512	0.0126	down
XLOC_005600	1.18787	0.00095	up
XLOC_005601	-1.12506	0.00035	down
XLOC_005609	2.82421	5e-05	up
XLOC_005634	-1.95776	0.03075	down
XLOC_005636	1.35993	0.00115	up
XLOC_005656	-0.914128	0.00165	down
XLOC_005658	0.691966	0.0335	up
XLOC_005659	0.774193	0.0463	up
XLOC_005691	0.813388	0.02665	up
XLOC_005754	-0.824666	0.0156	down
XLOC_005780	0.77624	0.01565	up
XLOC_005785	1.31318	0.0002	up
XLOC_005815	-inf	0.0205	down
XLOC_005821	-0.687251	0.0307	down
XLOC_005822	-1.70236	5e-05	down
XLOC_005866	1.24287	0.03195	up
XLOC_005872	-0.760869	0.0222	down
XLOC_005888	-inf	5e-05	down
XLOC_005898	1.29576	0.0004	up
XLOC_005905	1.73855	0.0077	up
XLOC_005906	-inf	5e-05	down
XLOC_005979	inf	0.00025	up
XLOC_006059	-2.09151	0.02885	down
XLOC_006067	-0.793644	0.00855	down
XLOC_006083	0.962398	0.00215	up
XLOC_006156	-0.920191	0.00655	down
XLOC_006214	-0.76101	0.01875	down
XLOC_006229	0.896894	0.04285	up
XLOC_006317	-0.653858	0.0236	down
XLOC_006318	-1.72127	0.03595	down
XLOC_006324	-2.20227	5e-05	down
XLOC_006346	0.844775	0.00735	up
XLOC_006348	1.14364	0.00115	up
XLOC_006364	1.85484	0.0467	up
XLOC_006395	-1.25931	0.00495	down
XLOC_006401	-0.627104	0.04215	down
XLOC_006430	1.67251	0.0033	up
XLOC_006517	1.53023	0.0178	up
XLOC_006533	-2.28098	0.0038	down
XLOC_006534	-0.691492	0.0285	down
XLOC_006554	-1.66381	0.0385	down
XLOC_006602	-inf	5e-05	down
XLOC_006654	-inf	5e-05	down
XLOC_006660	-0.761943	0.00985	down
XLOC_006679	0.848285	0.01235	up
XLOC_006702	1.06147	0.04465	up
XLOC_006794	0.902071	0.0123	up
XLOC_006815	-0.828296	0.01925	down
XLOC_006891	0.664291	0.04395	up
XLOC_006899	0.861074	0.04325	up
XLOC_006949	-0.635766	0.0459	down
XLOC_006978	-0.678781	0.03085	down
XLOC_007023	-0.779521	0.0438	down
XLOC_007035	-0.638568	0.0337	down
XLOC_007045	-0.569584	0.04895	down
XLOC_007064	-1.00708	0.03255	down
XLOC_007136	0.76887	0.01335	up
XLOC_007160	0.862275	0.029	up
XLOC_007193	-0.64728	0.03115	down
XLOC_007206	-1.06685	0.01515	down
XLOC_007220	-0.951194	0.0026	down
XLOC_007246	-1.02193	0.003	down
XLOC_007258	-1.12326	0.00035	down
XLOC_007299	0.853611	0.01935	up
XLOC_007328	-0.887347	0.0151	down
XLOC_007359	2.72508	0.0466	up
XLOC_007371	1.18069	0.0135	up
XLOC_007486	-0.839385	0.00625	down
XLOC_007503	1.70211	0.00685	up
XLOC_007505	-1.22639	0.00105	down
XLOC_007597	1.0722	0.00575	up
XLOC_007612	0.774918	0.0417	up
XLOC_007636	-1.18401	0.0058	down
XLOC_007637	-0.690469	0.02295	down
XLOC_007649	1.09146	0.00865	up
XLOC_007736	0.936918	0.0242	up
XLOC_007746	1.86988	0.0002	up
XLOC_007747	inf	0.0102	up
XLOC_007776	-0.829264	0.00665	down
XLOC_007778	-0.882649	0.0355	down
XLOC_007779	-1.74382	5e-05	down
XLOC_007817	-0.768003	0.01275	down
XLOC_007819	0.692265	0.02075	up
XLOC_007828	1.59452	5e-05	up
XLOC_007867	-0.868153	0.04895	down
XLOC_007893	inf	0.00275	up
XLOC_007915	0.845677	0.02375	up
XLOC_007976	0.785253	0.02025	up
XLOC_008020	0.856238	0.01235	up
XLOC_008021	0.627611	0.043	up
XLOC_008039	1.37233	0.03035	up
XLOC_008058	1.81691	0.0428	up
XLOC_008076	0.708532	0.02085	up
XLOC_008084	1.0469	0.0048	up
XLOC_008120	0.677083	0.04655	up
XLOC_008155	-2.38516	0.02355	down
XLOC_008213	-1.14914	0.00195	down
XLOC_008274	1.28534	0.00025	up
XLOC_008279	0.73037	0.04785	up
XLOC_008328	inf	0.00145	up
XLOC_008329	2.28893	5e-05	up
XLOC_008376	inf	0.0102	up
XLOC_008383	-0.716391	0.01485	down
XLOC_008399	-1.54791	0.0306	down
XLOC_008405	inf	0.0102	up
XLOC_008415	0.729772	0.0295	up
XLOC_008454	-0.904237	0.0161	down
XLOC_008461	-1.05756	0.0317	down
XLOC_008481	0.796655	0.01115	up
XLOC_008482	1.13951	0.001	up
XLOC_008507	-1.25245	0.0142	down
XLOC_008509	0.946627	0.04215	up
XLOC_008523	-inf	0.0019	down
XLOC_008541	0.861454	0.0433	up
XLOC_008546	1.4349	5e-05	up
XLOC_008560	1.39638	0.00595	up
XLOC_008567	inf	5e-05	up
XLOC_008571	-0.734353	0.0178	down
XLOC_008597	0.833051	0.0238	up
XLOC_008618	0.67037	0.0265	up
XLOC_008625	-0.831311	0.0133	down
XLOC_008697	-0.750242	0.0126	down
XLOC_008711	-2.99957	0.01665	down
XLOC_008719	0.881482	0.01555	up
XLOC_008748	0.719652	0.04005	up
XLOC_008772	-0.975927	0.03105	down
XLOC_008784	-inf	5e-05	down
XLOC_008799	-0.918958	0.0428	down
XLOC_008807	2.72554	0.00035	up
XLOC_008810	-1.11557	0.0002	down
XLOC_008811	inf	5e-05	up
XLOC_008812	4.2998	0.0084	up
XLOC_008813	-0.80073	0.0133	down
XLOC_008819	0.935383	0.0016	up
XLOC_008840	-1.26871	0.00555	down
XLOC_008853	-1.53541	0.02175	down
XLOC_008900	1.36915	0.02465	up
XLOC_008901	inf	5e-05	up
XLOC_008906	1.40895	0.01785	up
XLOC_008907	-2.47858	0.019	down
XLOC_008910	-1.96884	0.0012	down
XLOC_008911	1.05137	0.01085	up
XLOC_008920	-1.55355	0.01015	down
XLOC_008970	-1.19623	0.03945	down
XLOC_008997	-0.658271	0.0349	down
XLOC_009021	-1.58806	5e-05	down
XLOC_009030	-inf	0.01915	down
XLOC_009041	-0.872263	0.0132	down
XLOC_009048	1.02945	0.0006	up
XLOC_009049	0.659303	0.02675	up
XLOC_009067	1.58005	5e-05	up
XLOC_009072	1.11643	0.00045	up
XLOC_009099	-1.30753	0.00055	down
XLOC_009212	-0.865565	0.0112	down
XLOC_009216	0.821034	0.0138	up
XLOC_009244	2.07735	0.0014	up
XLOC_009259	-0.992021	0.02755	down
XLOC_009264	1.85524	0.024	up
XLOC_009358	-0.78351	0.0444	down
XLOC_009366	0.777718	0.01695	up
XLOC_009389	1.12483	0.00195	up
XLOC_009396	0.747153	0.0308	up
XLOC_009415	0.804675	0.01125	up
XLOC_009425	1.18298	0.04105	up
XLOC_009436	-0.832478	0.00865	down
XLOC_009448	1.0193	0.0104	up
XLOC_009486	0.878615	0.0088	up
XLOC_009488	-0.926713	0.02685	down
XLOC_009536	1.77248	5e-05	up
XLOC_009558	1.38428	0.00015	up
XLOC_009569	-inf	5e-05	down
XLOC_009583	-1.27241	0.0144	down
XLOC_009587	0.685441	0.0462	up
XLOC_009589	-1.35953	5e-05	down
XLOC_009592	0.658028	0.0337	up
XLOC_009611	-1.18838	0.0283	down
XLOC_009638	0.622299	0.04965	up
XLOC_009665	1.91459	5e-05	up
XLOC_009666	1.53973	0.0001	up
XLOC_009728	-1.0529	0.0012	down
XLOC_009810	0.897519	0.0046	up
XLOC_009821	-inf	0.01915	down
XLOC_009839	2.80309	0.0463	up
XLOC_009841	3.43799	5e-05	up
XLOC_009843	-4.63843	0.0227	down
XLOC_009861	-2.3981	0.04665	down
XLOC_009866	-1.72553	0.00095	down
XLOC_009867	-1.58152	0.00035	down
XLOC_009872	-0.766813	0.0138	down
XLOC_009920	-0.818494	0.01835	down
XLOC_009930	inf	0.0102	up
XLOC_009931	-0.983532	0.0055	down
XLOC_009934	-0.653367	0.04015	down
XLOC_009972	-inf	0.0044	down
XLOC_010000	-inf	5e-05	down
XLOC_010094	-1.41256	0.02625	down
XLOC_010118	1.16633	0.02425	up
XLOC_010147	-0.797531	0.01085	down
XLOC_010153	-2.82542	0.0005	down
XLOC_010172	0.98642	0.0008	up
XLOC_010177	-0.998773	0.00175	down
XLOC_010191	inf	5e-05	up
XLOC_010194	-1.48698	0.00875	down
XLOC_010203	-0.922898	0.0239	down
XLOC_010212	0.905294	0.00295	up
XLOC_010229	-0.778153	0.03635	down
XLOC_010235	1.28861	5e-05	up
XLOC_010260	1.1678	0.00795	up
XLOC_010264	-0.796373	0.0082	down
XLOC_010313	0.865757	0.02195	up
XLOC_010316	0.946528	0.01235	up
XLOC_010339	-2.34523	5e-05	down
XLOC_010358	-0.671387	0.04045	down
XLOC_010390	inf	0.0098	up
XLOC_010431	1.12503	0.0062	up
XLOC_010506	-2.91917	0.02505	down
XLOC_010532	-1.83582	0.01115	down
XLOC_010533	-0.727218	0.0319	down
XLOC_010539	-0.736955	0.04605	down
XLOC_010595	-0.706345	0.02235	down
XLOC_010612	inf	0.0254	up
XLOC_010625	0.958217	0.00175	up
XLOC_010718	1.31651	0.02965	up
XLOC_010761	0.91997	0.00615	up
XLOC_010771	-1.36064	0.00065	down
XLOC_010789	0.825746	0.03775	up
XLOC_010799	0.916214	0.0185	up
XLOC_010811	0.761444	0.02635	up
XLOC_010831	-0.781345	0.0274	down
XLOC_010857	1.25852	0.02175	up
XLOC_010865	-1.8819	0.0016	down
XLOC_010892	-1.19688	0.0008	down
XLOC_010936	-0.755906	0.01395	down
XLOC_010938	-0.586896	0.04265	down
XLOC_010942	-0.876643	0.0055	down
XLOC_010947	-0.893032	0.01355	down
XLOC_010948	-0.788835	0.02575	down
XLOC_010992	1.69414	0.0347	up
XLOC_011059	2.43952	5e-05	up
XLOC_011077	0.749879	0.01895	up
XLOC_011080	1.24693	0.00025	up
XLOC_011257	0.840142	0.00385	up
XLOC_011258	0.654781	0.03105	up
XLOC_011272	-0.765512	0.01525	down
XLOC_011288	-0.727763	0.03295	down
XLOC_011289	-inf	5e-05	down
XLOC_011352	-1.29825	0.0023	down
XLOC_011361	-0.748659	0.02545	down
XLOC_011393	-1.17897	0.0001	down
XLOC_011394	1.47271	5e-05	up
XLOC_011450	0.627231	0.0409	up
XLOC_011459	-0.619936	0.04485	down
XLOC_011491	-0.735497	0.031	down
XLOC_011541	-1.20449	0.00065	down
XLOC_011563	-0.713855	0.03535	down
XLOC_011582	inf	5e-05	up
XLOC_011613	0.943237	0.00335	up
XLOC_011670	-1.63257	0.00225	down
XLOC_011689	1.4296	0.0328	up
XLOC_011726	-inf	0.0001	down
XLOC_011739	-1.1307	0.00225	down
XLOC_011741	0.831288	0.0092	up
XLOC_011745	-0.802678	0.01635	down
XLOC_011788	-0.989937	0.00415	down
XLOC_011873	1.52049	5e-05	up
XLOC_011884	2.82292	0.0109	up
XLOC_011889	-inf	5e-05	down
XLOC_011946	-0.771653	0.0181	down
XLOC_011959	2.61526	0.00305	up
XLOC_011985	-0.632018	0.0351	down
XLOC_012003	0.930465	0.047	up
XLOC_012017	1.2947	0.00075	up
XLOC_012036	-1.75673	5e-05	down
XLOC_012047	1.80925	0.00165	up
XLOC_012060	2.86614	5e-05	up
XLOC_012066	0.679274	0.04065	up
XLOC_012068	-2.55496	5e-05	down
XLOC_012086	-1.11055	0.0009	down
XLOC_012087	0.687145	0.04085	up
XLOC_012107	2.50619	0.03805	up
XLOC_012113	inf	5e-05	up
XLOC_012135	1.48358	5e-05	up
XLOC_012160	-1.83792	0.0003	down
XLOC_012224	2.50774	0.0058	up
XLOC_012230	0.900994	0.00855	up
XLOC_012285	-1.18781	0.00235	down
XLOC_012289	0.656289	0.037	up
XLOC_012344	0.791989	0.01445	up
XLOC_012351	-1.38876	0.00755	down
XLOC_012401	1.49866	0.00075	up
XLOC_012418	0.723241	0.0317	up
XLOC_012431	-0.897548	0.00565	down
XLOC_012464	1.27648	0.03195	up
XLOC_012485	-0.96049	0.02715	down
XLOC_012505	0.864238	0.04585	up
XLOC_012533	inf	5e-05	up
XLOC_012534	inf	5e-05	up
XLOC_012535	-1.45379	0.00035	down
XLOC_012536	-0.737823	0.02985	down
XLOC_012554	-2.51164	0.01085	down
XLOC_012555	2.23167	0.00965	up
XLOC_012562	inf	5e-05	up
XLOC_012577	3.16128	0.04165	up
XLOC_012597	-0.738059	0.02375	down
XLOC_012607	-0.763642	0.02275	down
XLOC_012787	inf	0.04285	up
XLOC_012832	0.644321	0.03755	up
XLOC_012940	2.01705	5e-05	up
XLOC_012965	-0.690992	0.0201	down
XLOC_012982	-1.77546	0.0125	down
XLOC_013030	-inf	5e-05	down
XLOC_013040	-0.971419	0.0105	down
XLOC_013116	-1.30528	5e-05	down
XLOC_013137	0.6939	0.0453	up
XLOC_013152	-0.592681	0.04455	down
XLOC_013180	-0.862142	0.00745	down
XLOC_013203	0.935411	0.00845	up
XLOC_013215	1.3813	0.0335	up
XLOC_013223	1.38181	0.00285	up
XLOC_013255	1.12989	0.01865	up
XLOC_013273	-0.82988	0.0211	down
XLOC_013281	0.707437	0.0292	up
XLOC_013282	0.954371	0.00375	up
XLOC_013283	inf	0.0003	up
XLOC_013285	-0.674884	0.03585	down
XLOC_013381	-1.39293	0.0052	down
XLOC_013391	1.34765	0.0429	up
XLOC_013470	0.620888	0.0482	up
XLOC_013486	-1.70756	0.0097	down
XLOC_013509	1.44001	0.01285	up
XLOC_013530	1.47035	5e-05	up
XLOC_013548	-0.931284	0.01305	down
XLOC_013610	-0.624436	0.0383	down
XLOC_013635	inf	0.0015	up
XLOC_013663	0.766283	0.01885	up
XLOC_013664	-0.73258	0.0199	down
XLOC_013687	0.989451	0.00475	up
XLOC_013704	-1.39629	5e-05	down
XLOC_013705	1.2708	0.0351	up
XLOC_013779	1.00003	0.0031	up
XLOC_013798	-1.28221	0.0191	down
XLOC_013806	0.807549	0.01935	up
XLOC_013832	-0.686504	0.0251	down
XLOC_013840	0.914331	0.0129	up
XLOC_013849	-0.599122	0.0489	down
XLOC_013884	0.693626	0.0466	up
XLOC_013906	inf	0.0098	up
XLOC_013964	-0.879258	0.0341	down
XLOC_014006	0.657186	0.0303	up
XLOC_014043	-0.726537	0.0249	down
XLOC_014060	0.772662	0.0264	up
XLOC_014091	1.31554	5e-05	up
XLOC_014102	-1.71672	0.00215	down
XLOC_014110	1.51122	0.004	up
XLOC_014387	-1.91258	0.0443	down
XLOC_014405	1.45676	0.00125	up
XLOC_014431	-1.11365	0.00595	down
XLOC_014482	1.03261	0.01855	up
XLOC_014629	1.49692	0.0142	up
XLOC_014681	inf	0.0102	up
XLOC_014710	1.69723	0.0329	up
XLOC_014738	-0.823074	0.04885	down
XLOC_014750	-0.833186	0.0061	down
XLOC_014765	-0.751266	0.02085	down
XLOC_014794	0.993097	0.0006	up
XLOC_014798	1.41469	0.0328	up
XLOC_014834	0.831705	0.00805	up
XLOC_014846	2.10384	0.01905	up
XLOC_014884	-1.37317	0.03045	down
XLOC_014885	-1.05063	0.009	down
XLOC_014898	-1.65463	0.03495	down
XLOC_014920	-0.679885	0.03495	down
XLOC_014939	1.10841	0.0035	up
XLOC_014944	0.879315	0.0134	up
XLOC_014951	-1.11305	0.00915	down
XLOC_014967	-0.709755	0.0243	down
XLOC_014970	-0.668019	0.0307	down
XLOC_015001	-0.744522	0.01985	down
XLOC_015008	-0.935814	0.01595	down
XLOC_015029	-0.913315	0.04155	down
XLOC_015056	0.697261	0.0361	up
XLOC_015059	-1.18249	0.00995	down
XLOC_015136	0.662734	0.038	up
XLOC_015153	-0.688361	0.02305	down
XLOC_015249	-1.14201	0.0232	down
XLOC_015278	-0.635594	0.03855	down
XLOC_015282	0.83543	0.0072	up
XLOC_015291	1.13161	0.0008	up
XLOC_015313	-1.62191	0.00475	down
XLOC_015330	1.35215	0.0016	up
XLOC_015365	0.710884	0.04055	up
XLOC_015412	-0.848853	0.0055	down
XLOC_015413	-0.699926	0.0485	down
XLOC_015417	0.645423	0.0417	up
XLOC_015429	0.651057	0.02985	up
XLOC_015438	-1.11708	0.0004	down
XLOC_015440	1.11024	0.04405	up
XLOC_015455	-1.01735	0.04985	down
XLOC_015519	1.48184	0.00275	up
XLOC_015520	-1.24398	0.0008	down
XLOC_015537	-0.612613	0.0367	down
XLOC_015546	2.41345	0.0007	up
XLOC_015554	-0.627404	0.04025	down
XLOC_015583	-0.732987	0.01705	down
XLOC_015636	0.804979	0.0354	up
XLOC_015640	-1.52953	5e-05	down
XLOC_015645	1.01832	0.042	up
XLOC_015646	1.90651	0.00375	up
XLOC_015658	-0.951319	0.0058	down
XLOC_015677	-2.14408	5e-05	down
XLOC_015687	-1.13169	0.00305	down
XLOC_015694	2.00493	5e-05	up
XLOC_015733	-1.5511	0.00195	down
XLOC_015794	0.723155	0.0476	up
XLOC_015832	0.716618	0.03535	up
XLOC_015836	0.657823	0.0474	up
XLOC_015914	1.77347	0.00085	up
XLOC_015915	-inf	5e-05	down
XLOC_015916	-inf	5e-05	down
XLOC_015935	-inf	5e-05	down
XLOC_015936	-inf	0.0001	down
XLOC_015959	-1.21344	0.0292	down
XLOC_015961	-0.84269	0.0092	down
XLOC_015972	-1.45201	0.02075	down
XLOC_015973	-1.79533	0.0055	down
XLOC_015992	-0.771094	0.021	down
XLOC_015999	-0.813057	0.04915	down
XLOC_016003	-2.32376	0.0254	down
XLOC_016012	-0.772286	0.01385	down
XLOC_016081	1.35804	0.0022	up
XLOC_016084	-0.61436	0.0416	down
XLOC_016111	1.01032	0.0289	up
XLOC_016121	0.662061	0.04115	up
XLOC_016138	-1.51458	5e-05	down
XLOC_016152	-1.13178	0.0006	down
XLOC_016153	-1.6358	0.02335	down
XLOC_016154	-1.81101	5e-05	down
XLOC_016155	-0.841484	0.0192	down
XLOC_016156	-1.24094	0.0001	down
XLOC_016163	0.879754	0.02195	up
XLOC_016171	0.990472	0.0036	up
XLOC_016225	-1.22613	0.0053	down
XLOC_016265	-0.917282	0.03185	down
XLOC_016266	0.745093	0.03505	up
XLOC_016279	0.708658	0.0263	up
XLOC_016313	-0.822834	0.0261	down
XLOC_016373	0.660259	0.0491	up
XLOC_016396	1.41843	0.03465	up
XLOC_016402	-2.18964	0.02785	down
XLOC_016436	-1.1506	0.0003	down
XLOC_016458	0.723649	0.02305	up
XLOC_016461	0.737202	0.0213	up
XLOC_016467	1.17502	0.00435	up
XLOC_016483	-2.07614	5e-05	down
XLOC_016535	1.15646	0.00055	up
XLOC_016541	-0.797278	0.02915	down
XLOC_016542	-1.53694	5e-05	down
XLOC_016597	2.16099	0.0333	up
XLOC_016598	0.785098	0.0145	up
XLOC_016641	1.04006	0.0043	up
XLOC_016675	0.639084	0.03235	up
XLOC_016730	-0.822387	0.01035	down
XLOC_016792	-1.48122	0.02015	down
XLOC_016814	-1.09061	0.0148	down
XLOC_016826	0.819091	0.009	up
XLOC_016834	-0.882964	0.00725	down
XLOC_016861	-0.856124	0.0068	down
XLOC_016866	-0.789137	0.0067	down
XLOC_016880	-0.596295	0.0395	down
XLOC_016966	-0.918233	0.0023	down
XLOC_017052	-1.89971	0.03745	down
XLOC_017094	-0.88813	0.0035	down
XLOC_017147	1.54353	0.00055	up
XLOC_017203	0.629139	0.0464	up
XLOC_017255	inf	0.00175	up
XLOC_017258	-0.953712	0.0032	down
XLOC_017262	-2.21864	5e-05	down
XLOC_017304	-0.927769	0.0035	down
XLOC_017324	-0.773102	0.02535	down
XLOC_017401	-1.02854	0.00895	down
XLOC_017409	0.94043	0.02285	up
XLOC_017489	-1.20005	0.00505	down
XLOC_017505	-1.44781	5e-05	down
XLOC_017512	inf	0.0102	up
XLOC_017575	inf	0.01945	up
XLOC_017627	-0.703287	0.0287	down
XLOC_017631	1.66087	0.0038	up
XLOC_017650	-0.761422	0.01115	down
XLOC_017667	2.11284	0.0147	up
XLOC_017696	1.08233	0.00585	up
XLOC_017754	-0.713001	0.01555	down
XLOC_017760	-1.09122	0.0006	down
XLOC_017772	-0.657707	0.0354	down
XLOC_017775	-0.946314	0.00475	down
XLOC_017811	-0.768918	0.02215	down
XLOC_017822	-0.984335	0.0057	down
XLOC_017837	-inf	0.0368	down
XLOC_017843	-1.63168	0.0078	down
XLOC_017846	1.28989	5e-05	up
XLOC_017864	1.27679	0.0025	up
XLOC_017874	1.85937	0.0005	up
XLOC_017875	-1.5091	5e-05	down
XLOC_017893	1.79018	0.0036	up
XLOC_017978	0.983577	0.0311	up
XLOC_017997	-1.10991	0.00945	down
XLOC_018009	-0.957947	0.0013	down
XLOC_018047	3.51824	5e-05	up
XLOC_018079	-1.10398	0.0005	down
XLOC_018080	-0.874203	0.012	down
XLOC_018142	-0.931705	0.00685	down
XLOC_018201	0.955267	0.00755	up
XLOC_018238	0.804478	0.00755	up
XLOC_018301	0.774485	0.0298	up
XLOC_018336	1.20122	0.00025	up
XLOC_018442	-1.2601	0.02405	down
XLOC_018444	-0.730542	0.01465	down
XLOC_018445	-1.89835	0.0016	down
XLOC_018450	0.858172	0.02425	up
XLOC_018461	4.51049	0.00485	up
XLOC_018470	2.28133	5e-05	up
XLOC_018480	1.52052	5e-05	up
XLOC_018482	1.22988	0.0003	up
XLOC_018508	1.39557	0.01965	up
XLOC_018553	-0.727005	0.01645	down
XLOC_018577	-1.04319	0.0013	down
XLOC_018595	inf	5e-05	up
XLOC_018635	1.36927	5e-05	up
XLOC_018641	-1.04897	0.0052	down
XLOC_018689	1.17405	0.0006	up
XLOC_018726	-0.945668	0.00365	down
XLOC_018744	-1.07034	0.03585	down
XLOC_018791	-1.22626	0.02385	down
XLOC_018793	-1.63797	5e-05	down
XLOC_018794	-0.879282	0.0452	down
XLOC_018811	-0.694819	0.02035	down
XLOC_018820	1.74832	0.0001	up
XLOC_018861	0.642313	0.0371	up
XLOC_018893	0.827531	0.01225	up
XLOC_018897	-0.758007	0.01775	down
XLOC_018902	1.13118	0.0232	up
XLOC_018927	-0.710291	0.0367	down
XLOC_018954	inf	0.01945	up
XLOC_018966	-0.711135	0.04105	down
XLOC_018986	1.73989	0.00535	up
XLOC_019023	1.33689	0.0001	up
XLOC_019024	1.26185	5e-05	up
XLOC_019112	-1.09476	0.00315	down
XLOC_019122	-1.12845	0.00095	down
XLOC_019155	3.15157	5e-05	up
XLOC_019175	inf	5e-05	up
XLOC_019182	-0.786448	0.00865	down
XLOC_019205	0.866353	0.0066	up
XLOC_019245	-0.703953	0.0189	down
XLOC_019340	1.52342	0.0011	up
XLOC_019346	1.30226	0.0007	up
XLOC_019371	0.607096	0.04145	up
XLOC_019375	-1.51424	0.01235	down
XLOC_019435	0.791466	0.00745	up
XLOC_019453	-0.779893	0.0114	down
XLOC_019519	0.829606	0.0106	up
XLOC_019524	-1.16287	0.00985	down
XLOC_019532	-0.809216	0.0121	down
XLOC_019546	0.654656	0.0408	up
XLOC_019555	1.46495	0.0001	up
XLOC_019568	-2.38775	0.0049	down
XLOC_019604	0.720996	0.02585	up
XLOC_019608	-1.06588	0.04765	down
XLOC_019619	-1.0678	0.0135	down
XLOC_019624	0.649424	0.0262	up
XLOC_019631	-1.32926	0.0005	down
XLOC_019645	-0.599218	0.04955	down
XLOC_019654	0.848588	0.007	up
XLOC_019697	-1.50239	0.03355	down
XLOC_019720	1.3363	0.02865	up
XLOC_019726	-1.34484	5e-05	down
XLOC_019735	-1.9182	0.0037	down
XLOC_019781	1.1825	0.02335	up
XLOC_019803	-2.1459	0.0315	down
XLOC_019811	-1.8557	0.00355	down
XLOC_019829	-0.654762	0.029	down
XLOC_019832	-1.1884	0.00015	down
XLOC_019855	-0.806693	0.0076	down
XLOC_019858	1.95288	0.00015	up
XLOC_019925	-0.621083	0.0339	down
XLOC_019955	-0.819777	0.00915	down
XLOC_019966	-2.69015	0.03035	down
XLOC_019967	-1.16049	0.0077	down
XLOC_019968	-1.09825	0.0327	down
XLOC_019970	-1.06341	0.04885	down
XLOC_019973	1.24896	0.0405	up
XLOC_020002	-1.10745	0.00475	down
XLOC_020005	1.17914	0.0247	up
XLOC_020008	1.80993	0.00225	up
XLOC_020019	0.880619	0.0084	up
XLOC_020022	-inf	5e-05	down
XLOC_020030	-1.03616	0.00045	down
XLOC_020057	-1.75363	0.0011	down
XLOC_020063	-inf	5e-05	down
XLOC_020068	-2.36675	0.0491	down
XLOC_020071	-0.659425	0.03505	down
XLOC_020097	1.47164	0.0433	up
XLOC_020101	1.16146	0.00235	up
XLOC_020109	-1.97315	0.02775	down
XLOC_020115	-1.31048	0.02755	down
XLOC_020121	-1.00575	0.02845	down
XLOC_020124	-2.46782	0.01475	down
XLOC_020136	1.85845	0.0286	up
XLOC_020147	1.43289	0.00565	up
XLOC_020148	-0.639924	0.04955	down
XLOC_020159	0.690927	0.0321	up
XLOC_020171	0.686592	0.02785	up
XLOC_020195	-0.91442	0.00385	down
XLOC_020245	-0.711896	0.01635	down
XLOC_020248	-0.682763	0.0282	down
XLOC_020259	1.65041	0.0007	up
XLOC_020291	-1.25263	0.00015	down
XLOC_020294	-2.37499	0.04085	down
XLOC_020327	3.18647	0.0003	up
XLOC_020349	-1.30232	0.01885	down
XLOC_020367	-0.654085	0.0333	down
XLOC_020399	0.872997	0.0047	up
XLOC_020405	-0.959922	0.0105	down
XLOC_020414	1.98092	0.00055	up
XLOC_020452	-0.990392	0.01215	down
XLOC_020457	-0.682161	0.0229	down
XLOC_020466	0.891542	0.0024	up
XLOC_020480	-0.78501	0.0158	down
XLOC_020509	-0.914131	0.00225	down
XLOC_020516	0.684945	0.0401	up
XLOC_020520	-0.704544	0.0266	down
XLOC_020547	-1.63284	0.005	down
XLOC_020663	0.734069	0.0222	up
XLOC_020687	-0.931975	0.00165	down
XLOC_020690	1.15626	0.01625	up
XLOC_020701	-0.619576	0.0442	down
XLOC_020706	0.91513	0.0067	up
XLOC_020779	inf	5e-05	up
XLOC_020833	-0.611847	0.04805	down
XLOC_020892	3.24873	5e-05	up
XLOC_021040	-0.933365	0.0087	down
XLOC_021060	-0.5951	0.04395	down
XLOC_021136	-0.938258	0.01705	down
XLOC_021229	1.02637	0.0247	up
XLOC_021269	-0.682844	0.02775	down
XLOC_021271	-inf	5e-05	down
XLOC_021273	-1.05685	0.0006	down
XLOC_021299	1.31969	0.03805	up
XLOC_021307	-inf	0.00245	down
XLOC_021350	-0.742391	0.01555	down
XLOC_021377	1.16993	0.0227	up
XLOC_021378	1.34662	0.0007	up
XLOC_021386	-2.99522	0.00035	down
XLOC_021387	-1.81698	0.00015	down
XLOC_021415	1.41158	0.00015	up
XLOC_021422	-1.01215	0.00305	down
XLOC_021425	-1.02129	0.01435	down
XLOC_021468	-0.687568	0.0288	down
XLOC_021536	0.840667	0.0355	up
XLOC_021539	0.919548	0.017	up
XLOC_021541	-1.17943	5e-05	down
XLOC_021547	-0.933505	0.02395	down
XLOC_021625	-1.49473	0.0034	down
XLOC_021718	1.05788	0.00825	up
XLOC_021732	0.921313	0.0058	up
XLOC_021765	1.01297	0.0008	up
XLOC_021832	-0.796836	0.01235	down
XLOC_021833	-1.8533	0.0011	down
XLOC_021846	0.755878	0.0242	up
XLOC_021848	0.717208	0.0355	up
XLOC_021850	1.1448	0.01745	up
XLOC_021861	1.77714	0.01125	up
XLOC_021894	-0.844899	0.00725	down
XLOC_021926	-0.874449	0.0082	down
XLOC_021943	2.24418	0.0003	up
XLOC_021968	0.758172	0.0421	up
XLOC_021996	1.25237	0.0063	up
XLOC_022032	-0.841062	0.0087	down
XLOC_022036	-0.611419	0.0444	down
XLOC_022060	1.91014	0.03275	up
XLOC_022093	0.767762	0.01385	up
XLOC_022102	-0.817449	0.0117	down
XLOC_022124	-0.971129	0.00215	down
XLOC_022126	-0.993047	0.00355	down
XLOC_022130	-1.0234	0.02085	down
XLOC_022139	1.31542	0.0158	up
XLOC_022167	-1.95175	5e-05	down
XLOC_022196	0.788722	0.01135	up
XLOC_022199	0.788772	0.01655	up
XLOC_022276	0.77089	0.02165	up
XLOC_022277	0.815611	0.01235	up
XLOC_022284	-0.759193	0.03015	down
XLOC_022285	-0.629518	0.0399	down
XLOC_022300	-1.54555	0.00175	down
XLOC_022325	-1.30738	0.0037	down
XLOC_022376	1.48618	5e-05	up
XLOC_022431	1.57082	5e-05	up
XLOC_022432	0.988701	0.013	up
XLOC_022461	0.935368	0.0434	up
XLOC_022492	-0.870385	0.01075	down
XLOC_022509	0.7455	0.0496	up
XLOC_022591	-0.670152	0.0289	down
XLOC_022608	-0.589191	0.0466	down
XLOC_022618	0.80546	0.02185	up
XLOC_022710	0.741333	0.0356	up
XLOC_022773	-0.67159	0.0335	down
XLOC_022793	-inf	0.0044	down
XLOC_022794	-0.757399	0.0156	down
XLOC_022797	1.31694	0.02535	up
XLOC_022824	1.43379	0.0164	up
XLOC_022825	1.27918	0.03025	up
XLOC_022844	1.13504	0.0072	up
XLOC_022862	-1.98466	0.0002	down
XLOC_022898	-1.281	0.0453	down
XLOC_022899	-0.620321	0.0424	down
XLOC_022903	-1.77602	0.0081	down
XLOC_022918	-1.03565	0.0013	down
XLOC_022941	-1.18671	0.0001	down
XLOC_022964	inf	0.0011	up
XLOC_022966	1.96093	5e-05	up
XLOC_022973	-0.675565	0.0369	down
XLOC_022996	-0.645391	0.04645	down
XLOC_023018	-0.969865	0.03535	down
XLOC_023157	3.68783	0.00435	up
XLOC_023184	-1.37379	0.0002	down
XLOC_023190	-0.841021	0.00865	down
XLOC_023222	-inf	0.0237	down
XLOC_023246	-2.30382	5e-05	down
XLOC_023330	0.627775	0.03315	up
XLOC_023363	-1.79131	0.0004	down
XLOC_023370	-1.16944	0.0148	down
XLOC_023388	-inf	0.01285	down
XLOC_023409	-1.49516	0.0213	down
XLOC_023430	0.70119	0.02235	up
XLOC_023431	-2.64346	0.0083	down
XLOC_023432	-1.7622	0.01285	down
XLOC_023441	1.48282	0.01525	up
XLOC_023456	-4.94319	5e-05	down
XLOC_023457	-inf	0.001	down
XLOC_023470	inf	0.0003	up
XLOC_023486	-2.33596	0.02545	down
XLOC_023488	1.42924	0.043	up
XLOC_023496	-3.60765	0.01975	down
XLOC_023497	-3.46478	0.0199	down
XLOC_023502	-0.757252	0.0252	down
XLOC_023516	-1.04438	0.03915	down
XLOC_023523	3.61706	0.00505	up
XLOC_023524	3.7951	0.0156	up
XLOC_023526	inf	5e-05	up
XLOC_023534	-1.43694	0.0004	down
XLOC_023549	1.23475	0.0001	up
XLOC_023591	3.10169	5e-05	up
XLOC_023599	0.787699	0.0456	up
XLOC_023625	0.788995	0.01435	up
XLOC_023628	1.3971	0.01425	up
XLOC_023660	-0.917519	0.03505	down
XLOC_023689	-0.982483	0.0068	down
XLOC_023704	-3.47856	0.0004	down
XLOC_023708	1.30967	0.0189	up
XLOC_023729	-0.985408	0.0051	down
XLOC_023752	0.747077	0.01405	up
XLOC_023767	0.740416	0.0369	up
XLOC_023783	-0.731427	0.01285	down
XLOC_023801	0.630878	0.03645	up
XLOC_023810	1.25261	0.0229	up
XLOC_023820	-0.86969	0.02235	down
XLOC_023861	-0.806435	0.03385	down
XLOC_023897	-0.617439	0.04435	down
XLOC_023929	-1.39728	5e-05	down
XLOC_023938	-1.02799	0.00095	down
XLOC_023940	-1.0306	0.0016	down
XLOC_023950	-0.705848	0.0202	down
XLOC_023970	1.22665	0.04675	up
XLOC_023998	0.647134	0.0385	up
XLOC_024037	-1.18512	0.02925	down
XLOC_024045	2.73621	0.00785	up
XLOC_024128	2.44464	0.022	up
XLOC_024138	4.8275	0.0389	up
XLOC_024147	-0.85251	0.02595	down
XLOC_024172	-1.64394	0.0082	down
XLOC_024234	2.63013	0.00085	up
XLOC_024250	-0.734609	0.04855	down
XLOC_024254	-2.19404	0.003	down
XLOC_024264	-0.593327	0.0447	down
XLOC_024271	-0.853658	0.00345	down
XLOC_024281	-0.909909	0.00705	down
XLOC_024307	1.34411	0.0063	up
XLOC_024409	0.980493	0.01725	up
XLOC_024425	0.789887	0.02165	up
XLOC_024434	-2.00636	5e-05	down
XLOC_024449	0.913819	0.02215	up
XLOC_024487	1.54897	0.00065	up
XLOC_024544	1.65475	5e-05	up
XLOC_024550	-0.747567	0.0132	down
XLOC_024555	0.63791	0.03635	up
XLOC_024582	-1.01574	0.00075	down
XLOC_024583	-1.73351	0.02005	down
XLOC_024601	-1.62312	0.00765	down
XLOC_024640	-0.772326	0.01915	down
XLOC_024643	-1.32284	0.00765	down
XLOC_024645	-inf	0.01915	down
XLOC_024652	1.51341	5e-05	up
XLOC_024659	-0.598892	0.04265	down
XLOC_024698	-0.724804	0.0197	down
XLOC_024700	-1.30196	0.0001	down
XLOC_024708	1.31728	5e-05	up
XLOC_024742	1.03233	0.0008	up
XLOC_024768	-0.666526	0.0263	down
XLOC_024774	-0.644849	0.03085	down
XLOC_024780	-0.598577	0.0451	down
XLOC_024791	-2.5973	5e-05	down
XLOC_024827	-2.40759	0.0243	down
XLOC_024851	0.704988	0.04125	up
XLOC_024872	-0.908951	0.00255	down
XLOC_024879	-inf	5e-05	down
XLOC_024922	-0.690263	0.02545	down
XLOC_024932	-1.16335	0.00585	down
XLOC_024951	-5.12244	5e-05	down
XLOC_024954	1.85288	0.00625	up
XLOC_024962	-2.99565	0.0247	down
XLOC_024964	-0.58967	0.045	down
XLOC_024968	-0.790979	0.0491	down
XLOC_024990	-0.864142	0.00265	down
XLOC_025019	-1.42692	0.00185	down
XLOC_025022	inf	5e-05	up
XLOC_025034	-1.706	0.0028	down
XLOC_025046	-1.89308	0.00025	down
XLOC_025087	-2.06249	0.0441	down
XLOC_025101	-1.88625	0.03325	down
XLOC_025121	-0.633501	0.03845	down
XLOC_025128	2.17427	0.0401	up
XLOC_025130	-1.63214	0.002	down
XLOC_025138	-0.732762	0.01625	down
XLOC_025263	2.49777	0.04075	up
XLOC_025269	-1.39254	0.0009	down
XLOC_025272	0.806214	0.04815	up
XLOC_025292	-1.55589	5e-05	down
XLOC_025300	-2.76907	0.0018	down
XLOC_025305	-0.922116	0.0052	down
XLOC_025404	2.50691	0.0003	up
XLOC_025418	2.00447	0.00235	up
XLOC_025419	1.66985	0.0141	up
XLOC_025521	-4.34332	0.0001	down
XLOC_025522	-0.847698	0.04425	down
XLOC_025524	-inf	5e-05	down
XLOC_025658	1.69533	0.00345	up
XLOC_025663	1.20365	0.0288	up
XLOC_025664	1.36173	0.01865	up
XLOC_025696	2.17182	0.0032	up
XLOC_025711	3.7028	0.00945	up
XLOC_025726	-4.16633	5e-05	down
XLOC_025754	-1.01868	0.00125	down
XLOC_025769	-inf	0.0046	down
XLOC_025913	-inf	5e-05	down
XLOC_025923	1.7077	0.00035	up
XLOC_025942	1.1348	0.0006	up
XLOC_025977	1.50645	0.0003	up
XLOC_025979	1.01332	0.003	up
XLOC_026213	-inf	5e-05	down
XLOC_026315	-1.22068	0.02285	down
XLOC_026321	inf	5e-05	up
XLOC_026335	-1.03426	0.00215	down
XLOC_026397	-1.26594	0.00015	down
XLOC_026450	inf	5e-05	up
XLOC_026451	inf	5e-05	up
XLOC_026454	-2.02757	0.0167	down
XLOC_026455	1.76986	0.00015	up
XLOC_026469	0.884745	0.02265	up
XLOC_026474	1.06995	0.01915	up
XLOC_026480	-2.67	0.0002	down
XLOC_026481	inf	5e-05	up
XLOC_026495	-0.865112	0.04445	down
XLOC_026513	-0.680009	0.04965	down
XLOC_026636	0.951449	0.00815	up
XLOC_026641	-inf	5e-05	down
XLOC_026642	-inf	5e-05	down
XLOC_026643	-inf	0.00245	down
XLOC_026659	-inf	5e-05	down
XLOC_026692	-1.81023	0.0243	down
XLOC_026713	0.744553	0.03205	up
XLOC_026738	1.27476	0.013	up
XLOC_026755	-0.634856	0.03845	down
XLOC_026814	1.54228	5e-05	up
XLOC_026846	-1.44357	0.00385	down
XLOC_026914	-inf	0.0042	down
XLOC_026938	-0.732918	0.0418	down
XLOC_026983	-1.20501	0.04205	down
XLOC_027009	inf	5e-05	up
XLOC_027091	0.903593	0.0111	up
XLOC_027176	inf	5e-05	up
XLOC_027242	0.652544	0.0348	up
XLOC_027462	-4.29921	0.01975	down
XLOC_027474	-2.35677	0.00705	down
XLOC_027477	-2.17723	0.00015	down
XLOC_027479	inf	5e-05	up
XLOC_027480	inf	5e-05	up
XLOC_027502	1.00091	0.0151	up
XLOC_027575	-0.784582	0.0088	down
XLOC_027589	-inf	5e-05	down
XLOC_027652	inf	5e-05	up
XLOC_027653	inf	5e-05	up
XLOC_027654	-0.996956	0.03425	down
XLOC_027707	0.710536	0.03615	up
XLOC_027708	0.756382	0.02305	up
XLOC_027748	-3.4025	0.0401	down
XLOC_027776	-3.3247	5e-05	down
XLOC_027779	inf	0.0102	up
XLOC_027784	-inf	5e-05	down
XLOC_027785	-inf	0.00015	down
XLOC_027787	-inf	5e-05	down
XLOC_027876	1.15413	0.03125	up
XLOC_027915	-1.48971	5e-05	down
XLOC_027942	-2.51175	0.0404	down
XLOC_027943	1.31679	0.0013	up
XLOC_027960	-0.820391	0.0117	down
XLOC_027986	-inf	0.0368	down
XLOC_028015	-0.941598	0.03825	down
XLOC_028265	3.34217	5e-05	up
XLOC_028310	0.999692	0.0101	up
XLOC_028343	-1.46749	5e-05	down
XLOC_028382	-0.659581	0.0424	down
XLOC_028398	-2.89596	0.045	down
XLOC_028399	-3.6131	0.0002	down
XLOC_028596	-1.13047	0.0005	down
XLOC_028617	-inf	0.0001	down
XLOC_028645	-1.01949	0.04585	down
XLOC_028648	1.61198	0.02385	up
XLOC_028664	-1.58289	0.02505	down
XLOC_028665	-1.09998	0.00165	down
XLOC_028676	0.706971	0.0435	up
XLOC_028695	1.62068	0.0019	up
XLOC_028759	-2.23182	0.01125	down
XLOC_028798	-1.27587	0.00745	down
XLOC_028923	-inf	0.0452	down
XLOC_029019	inf	0.0098	up
XLOC_029033	1.81319	0.0431	up
XLOC_029065	-inf	0.0368	down
XLOC_029085	-1.25074	0.0165	down
XLOC_029099	-1.29271	0.007	down
XLOC_029145	-0.864576	0.00685	down
XLOC_029326	1.27889	0.0001	up
XLOC_029331	-6.56277	0.02415	down
XLOC_029494	inf	5e-05	up
XLOC_029609	-0.894977	0.00765	down
XLOC_029751	3.1202	0.03055	up
XLOC_029789	-inf	0.0006	down
XLOC_029790	-0.793884	0.0138	down
XLOC_029807	-2.95037	0.0451	down
XLOC_029808	-inf	0.0001	down
XLOC_029809	-inf	5e-05	down
XLOC_029810	-inf	0.0001	down
XLOC_029811	-inf	5e-05	down
XLOC_029866	0.832076	0.0139	up
XLOC_029886	2.85305	0.0421	up
XLOC_029932	inf	0.0005	up
XLOC_029934	-1.17102	0.04545	down
XLOC_029952	-0.883682	0.0185	down
XLOC_029954	-2.16894	0.0112	down
XLOC_030116	4.20156	0.0087	up
XLOC_030137	-1.30716	0.04385	down
XLOC_030148	inf	0.0035	up
XLOC_030153	-inf	0.0004	down
XLOC_030306	-0.943853	0.01835	down
XLOC_030325	-1.11692	0.0038	down
XLOC_030428	-0.686206	0.0277	down
XLOC_030442	2.36513	5e-05	up
XLOC_030508	1.87981	0.0087	up
XLOC_030515	3.40335	0.0176	up
XLOC_030590	inf	0.00015	up
XLOC_030601	-1.26953	0.013	down
XLOC_030637	0.87697	0.00795	up
