# Supplementary material for: Unravelling Differential DNA Methylation Patterns in Genotype Dependent Manner under Salinity Stress Response in Chickpea
Source: Int J Mol Sci. 2023 Jan 18;24(3):1863. doi: 10.3390/ijms24031863 (PMC9915442; doi:10.3390/ijms24031863)
Supplement: Supplementary file 1 [file ijms-24-01863-s001.zip › Supplementary Table S5.xlsx]

## Sheet: SS-ST-Common-UP
GO-ID	p-value	corr p-value	x	n	X	N	Description
3824	0.0002	0.0418	20	7553	35	27594	catalytic activity
9699	0.000312	0.0418	3	104	35	27594	phenylpropanoid biosynthetic process
9698	0.00064	0.0418	3	133	35	27594	phenylpropanoid metabolic process
19748	0.000785	0.0418	4	330	35	27594	secondary metabolic process
33799	0.00127	0.0418	1	1	35	27594	myricetin 3'-O-methyltransferase activity
30755	0.00127	0.0418	1	1	35	27594	quercetin 3-O-methyltransferase activity
47763	0.00127	0.0418	1	1	35	27594	caffeate O-methyltransferase activity
8886	0.00127	0.0418	1	1	35	27594	glyceraldehyde-3-phosphate dehydrogenase (NADP+) activity
42398	0.00132	0.0418	3	171	35	27594	cellular amino acid derivative biosynthetic process
19438	0.00146	0.0418	3	177	35	27594	aromatic compound biosynthetic process
5576	0.0015	0.0418	4	393	35	27594	extracellular region
9813	0.00156	0.0418	2	46	35	27594	flavonoid biosynthetic process
44464	0.0016	0.0418	24	11708	35	27594	cell part
5623	0.0016	0.0418	24	11708	35	27594	cell
9812	0.00192	0.0464	2	51	35	27594	flavonoid metabolic process
10035	0.00215	0.0464	4	434	35	27594	response to inorganic substance
50810	0.00254	0.0464	1	2	35	27594	regulation of steroid biosynthetic process
10422	0.00254	0.0464	1	2	35	27594	regulation of brassinosteroid biosynthetic process
19218	0.00254	0.0464	1	2	35	27594	regulation of steroid metabolic process
90030	0.00254	0.0464	1	2	35	27594	regulation of steroid hormone biosynthetic process
19825	0.00282	0.0491	3	223	35	27594	oxygen binding
6575	0.00311	0.0517	3	231	35	27594	cellular amino acid derivative metabolic process
46885	0.0038	0.0556	1	3	35	27594	regulation of hormone biosynthetic process
4512	0.0038	0.0556	1	3	35	27594	inositol-3-phosphate synthase activity
46509	0.0038	0.0556	1	3	35	27594	1,2-diacylglycerol 3-beta-galactosyltransferase activity
44281	0.00445	0.0604	6	1248	35	27594	small molecule metabolic process
16036	0.00464	0.0604	2	80	35	27594	cellular response to phosphate starvation
10264	0.00506	0.0604	1	4	35	27594	myo-inositol hexakisphosphate biosynthetic process
32958	0.00506	0.0604	1	4	35	27594	inositol phosphate biosynthetic process
33517	0.00506	0.0604	1	4	35	27594	myo-inositol hexakisphosphate metabolic process
50896	0.00524	0.0604	10	3207	35	27594	response to stimulus
6629	0.00596	0.0604	4	578	35	27594	lipid metabolic process
6725	0.0062	0.0604	3	296	35	27594	cellular aromatic compound metabolic process
32350	0.00633	0.0604	1	5	35	27594	regulation of hormone metabolic process
10345	0.00633	0.0604	1	5	35	27594	suberin biosynthetic process
15556	0.00633	0.0604	1	5	35	27594	C4-dicarboxylate transmembrane transporter activity
15140	0.00633	0.0604	1	5	35	27594	malate transmembrane transporter activity
16830	0.00635	0.0604	2	94	35	27594	carbon-carbon lyase activity
4497	0.00644	0.0604	3	300	35	27594	monooxygenase activity
9267	0.00716	0.0612	2	100	35	27594	cellular response to starvation
8393	0.00759	0.0612	1	6	35	27594	fatty acid (omega-1)-hydroxylase activity
30976	0.00759	0.0612	1	6	35	27594	thiamin pyrophosphate binding
10044	0.00759	0.0612	1	6	35	27594	response to aluminum ion
6021	0.00759	0.0612	1	6	35	27594	inositol biosynthetic process
35250	0.00759	0.0612	1	6	35	27594	UDP-galactosyltransferase activity
44283	0.00769	0.0612	4	622	35	27594	small molecule biosynthetic process
42594	0.00801	0.0624	2	106	35	27594	response to starvation
46173	0.00885	0.0627	1	7	35	27594	polyol biosynthetic process
4332	0.00885	0.0627	1	7	35	27594	fructose-bisphosphate aldolase activity
19374	0.00885	0.0627	1	7	35	27594	galactolipid metabolic process
19375	0.00885	0.0627	1	7	35	27594	galactolipid biosynthetic process
31669	0.00921	0.0627	2	114	35	27594	cellular response to nutrient levels
10038	0.00981	0.0627	3	350	35	27594	response to metal ion
5310	0.0101	0.0627	1	8	35	27594	dicarboxylic acid transmembrane transporter activity
8943	0.0101	0.0627	1	8	35	27594	glyceraldehyde-3-phosphate dehydrogenase activity
51552	0.0101	0.0627	1	8	35	27594	flavone metabolic process
51553	0.0101	0.0627	1	8	35	27594	flavone biosynthetic process
51554	0.0101	0.0627	1	8	35	27594	flavonol metabolic process
51555	0.0101	0.0627	1	8	35	27594	flavonol biosynthetic process
9266	0.0105	0.0641	3	359	35	27594	response to temperature stimulus
31667	0.0112	0.0647	2	126	35	27594	response to nutrient levels
43647	0.0114	0.0647	1	9	35	27594	inositol phosphate metabolic process
16872	0.0114	0.0647	1	9	35	27594	intramolecular lyase activity
71496	0.0115	0.0647	2	128	35	27594	cellular response to external stimulus
31668	0.0115	0.0647	2	128	35	27594	cellular response to extracellular stimulus
9991	0.0136	0.0756	2	140	35	27594	response to extracellular stimulus
44255	0.0144	0.0787	3	404	35	27594	cellular lipid metabolic process
46890	0.0151	0.0814	1	12	35	27594	regulation of lipid biosynthetic process
6020	0.0164	0.0868	1	13	35	27594	inositol metabolic process
8378	0.0176	0.0895	1	14	35	27594	galactosyltransferase activity
4028	0.0176	0.0895	1	14	35	27594	3-chloroallyl aldehyde dehydrogenase activity
16832	0.0176	0.0895	1	14	35	27594	aldehyde-lyase activity
50662	0.018	0.09	2	162	35	27594	coenzyme binding
9247	0.0189	0.0908	1	15	35	27594	glycolipid biosynthetic process
16128	0.0189	0.0908	1	15	35	27594	phytosteroid metabolic process
16131	0.0189	0.0908	1	15	35	27594	brassinosteroid metabolic process
42221	0.0194	0.0921	6	1710	35	27594	response to chemical stimulus
8194	0.0199	0.0921	2	171	35	27594	UDP-glycosyltransferase activity
6631	0.0199	0.0921	2	171	35	27594	fatty acid metabolic process
19216	0.0214	0.0977	1	17	35	27594	regulation of lipid metabolic process
6664	0.0226	0.102	1	18	35	27594	glycolipid metabolic process
6519	0.023	0.103	3	483	35	27594	cellular amino acid and derivative metabolic process
1666	0.0238	0.104	1	19	35	27594	response to hypoxia
51607	0.0238	0.104	1	19	35	27594	defense response to virus
16491	0.0249	0.107	5	1326	35	27594	oxidoreductase activity
70482	0.0263	0.112	1	21	35	27594	response to oxygen levels
6066	0.0266	0.112	2	200	35	27594	alcohol metabolic process
6098	0.0275	0.113	1	22	35	27594	pentose-phosphate shunt
7154	0.0281	0.113	2	206	35	27594	cell communication
5737	0.0286	0.113	11	4745	35	27594	cytoplasm
6740	0.0288	0.113	1	23	35	27594	NADPH regeneration
80043	0.0288	0.113	1	23	35	27594	quercetin 3-O-glucosyltransferase activity
2252	0.0288	0.113	1	23	35	27594	immune effector process
51707	0.029	0.113	3	528	35	27594	response to other organism
9707	0.03	0.116	1	24	35	27594	chloroplast outer membrane
16740	0.0305	0.116	7	2429	35	27594	transferase activity
46467	0.0312	0.117	1	25	35	27594	membrane lipid biosynthetic process
48037	0.0314	0.117	2	219	35	27594	cofactor binding
9607	0.0322	0.118	3	550	35	27594	response to biotic stimulus
6739	0.0325	0.118	1	26	35	27594	NADP metabolic process
9831	0.0325	0.118	1	26	35	27594	plant-type cell wall modification involved in multidimensional cell growth
12505	0.0338	0.121	7	2482	35	27594	endomembrane system
9605	0.0341	0.121	2	229	35	27594	response to external stimulus
42547	0.0349	0.122	1	28	35	27594	cell wall modification involved in multidimensional cell growth
9809	0.0349	0.122	1	28	35	27594	lignin biosynthetic process
9527	0.0374	0.128	1	30	35	27594	plastid outer membrane
9409	0.0374	0.128	2	241	35	27594	response to cold
46165	0.0386	0.13	1	31	35	27594	alcohol biosynthetic process
8171	0.0386	0.13	1	31	35	27594	O-methyltransferase activity
46496	0.0398	0.133	1	32	35	27594	nicotinamide nucleotide metabolic process
9828	0.0435	0.141	1	35	35	27594	plant-type cell wall loosening
16620	0.0435	0.141	1	35	35	27594	oxidoreductase activity, acting on the aldehyde or oxo group of donors, NAD or NADP as acceptor
6643	0.0435	0.141	1	35	35	27594	membrane lipid metabolic process
19751	0.0447	0.142	1	36	35	27594	polyol metabolic process
19362	0.0447	0.142	1	36	35	27594	pyridine nucleotide metabolic process
4175	0.0487	0.152	2	279	35	27594	endopeptidase activity
46686	0.0487	0.152	2	279	35	27594	response to cadmium ion
6733	0.0495	0.152	1	40	35	27594	oxidoreduction coenzyme metabolic process
9733	0.0496	0.152	2	282	35	27594	response to auxin stimulus
16758	0.05	0.152	2	283	35	27594	transferase activity, transferring hexosyl groups

## Sheet: SS-ST-Common-down
GO-ID	p-value	x	n	X	N	Description
16701	0.00031787	2	28	26	27594	oxidoreductase activity, acting on single donors with incorporation of molecular oxygen
30001	0.0004761	3	163	26	27594	metal ion transport
10149	0.00068438	2	41	26	27594	senescence
3993	0.00078817	2	44	26	27594	acid phosphatase activity
30397	0.00094223	1	1	26	27594	membrane disassembly
46864	0.00094223	1	1	26	27594	isoprenoid transport
46865	0.00094223	1	1	26	27594	terpenoid transport
6812	0.0020606	3	271	26	27594	cation transport
7568	0.0027068	2	82	26	27594	aging
15692	0.0037638	1	4	26	27594	lead ion transport
50113	0.0037638	1	4	26	27594	inositol oxygenase activity
6811	0.0040698	3	345	26	27594	ion transport
9814	0.0043914	2	105	26	27594	defense response, incompatible interaction
4709	0.0047026	1	5	26	27594	MAP kinase kinase kinase activity
4722	0.0049793	2	112	26	27594	protein serine/threonine phosphatase activity
22857	0.0074753	4	840	26	27594	transmembrane transporter activity
16165	0.007514	1	8	26	27594	lipoxygenase activity
15271	0.007514	1	8	26	27594	outward rectifier potassium channel activity
9753	0.0085348	2	148	26	27594	response to jasmonic acid stimulus
4721	0.009097	2	153	26	27594	phosphoprotein phosphatase activity
6879	0.010318	1	11	26	27594	cellular iron ion homeostasis
22804	0.011343	3	501	26	27594	active transmembrane transporter activity
55072	0.013114	1	14	26	27594	iron ion homeostasis
6949	0.013114	1	14	26	27594	syncytium formation
9607	0.014565	3	550	26	27594	response to biotic stimulus
10033	0.015332	4	1037	26	27594	response to organic substance
22411	0.015902	1	17	26	27594	cellular component disassembly
6825	0.017757	1	19	26	27594	copper ion transport
9695	0.018683	1	20	26	27594	jasmonic acid biosynthetic process
5215	0.020086	4	1125	26	27594	transporter activity
5249	0.020533	1	22	26	27594	voltage-gated potassium channel activity
22843	0.021457	1	23	26	27594	voltage-gated cation channel activity
16702	0.021457	1	23	26	27594	oxidoreductase activity, acting on single donors with incorporation of molecular oxygen, incorporation of two atoms of oxygen
10193	0.021457	1	23	26	27594	response to ozone
9694	0.021457	1	23	26	27594	jasmonic acid metabolic process
16791	0.022011	2	244	26	27594	phosphatase activity
5267	0.022379	1	24	26	27594	potassium channel activity
31408	0.022379	1	24	26	27594	oxylipin biosynthetic process
51213	0.023301	1	25	26	27594	dioxygenase activity
6855	0.024223	1	26	26	27594	drug transmembrane transport
45087	0.024243	2	257	26	27594	innate immune response
15291	0.024594	2	259	26	27594	secondary active transmembrane transporter activity
15893	0.025143	1	27	26	27594	drug transport
9816	0.025143	1	27	26	27594	defense response to bacterium, incompatible interaction
16682	0.025143	1	27	26	27594	oxidoreductase activity, acting on diphenols and related substances as donors, oxygen as acceptor
30551	0.026062	1	28	26	27594	cyclic nucleotide binding
42493	0.026062	1	28	26	27594	response to drug
9737	0.026929	2	272	26	27594	response to abscisic acid stimulus
6955	0.026929	2	272	26	27594	immune response
10260	0.026981	1	29	26	27594	organ senescence
31407	0.026981	1	29	26	27594	oxylipin metabolic process
2376	0.028972	2	283	26	27594	immune system process
5261	0.029732	1	32	26	27594	cation channel activity
16679	0.032475	1	35	26	27594	oxidoreductase activity, acting on diphenols and related substances as donors
42578	0.03324	2	305	26	27594	phosphoric ester hydrolase activity
9725	0.034592	3	767	26	27594	response to hormone stimulus
5244	0.035211	1	38	26	27594	voltage-gated ion channel activity
22832	0.035211	1	38	26	27594	voltage-gated channel activity
4712	0.036121	1	39	26	27594	protein serine/threonine/tyrosine kinase activity
4702	0.038847	1	42	26	27594	receptor signaling protein serine/threonine kinase activity
6813	0.04066	1	44	26	27594	potassium ion transport
5057	0.04066	1	44	26	27594	receptor signaling protein activity
9813	0.04247	1	46	26	27594	flavonoid biosynthetic process
9719	0.042812	3	835	26	27594	response to endogenous stimulus
30005	0.043374	1	47	26	27594	cellular di-, tri-valent inorganic cation homeostasis
41	0.04608	1	50	26	27594	transition metal ion transport
8324	0.046935	2	369	26	27594	cation transmembrane transporter activity
9812	0.046981	1	51	26	27594	flavonoid metabolic process
