# Supplementary material for: Unravelling Differential DNA Methylation Patterns in Genotype Dependent Manner under Salinity Stress Response in Chickpea
Source: Int J Mol Sci. 2023 Jan 18;24(3):1863. doi: 10.3390/ijms24031863 (PMC9915442; doi:10.3390/ijms24031863)
Supplement: Supplementary file 1 [file ijms-24-01863-s001.zip › Supplementary Table S6.xlsx]

## Sheet: DMR-DEG-SS
test_id	log2(fold_change)	p_value	DMR	pvalue	meth.diff	CONTEXT
XLOC_019122	-1.37538	5e-05	Ca6-26817601:26817700	5.73061e-06	26.2631	CG-HYPER-FLANKING (2KB)-DEG-DOWN
XLOC_008005	-0.974889	0.0068	Ca3-25175401:25175500	4.71279e-07	26.7729	CG-HYPER-FLANKING (2KB)-DEG-DOWN
XLOC_003306	-inf	5e-05	Ca1-46531051:46531200	7.95348e-12	27.6083	CG-HYPER-FLANKING (2KB)-DEG-DOWN
XLOC_020935	1.32655	0.04095	Ca7-16065151:16065250	5.11192e-09	30.7203	CG-HYPER-FLANKING (-2KB)-DEG-UP
XLOC_003236	1.37116	0.00365	Ca1-43429951:43430100	5.47072e-08	27.6849	CG-HYPER-FLANKING (-2KB)-DEG-UP
XLOC_005634	-3.10484	0.03185	Ca2-31963001:31963100	2.02423e-24	34.4469	CG-HYPER-GB-DEG-DOWN
XLOC_010532	-2.01119	0.00025	Ca4-45231301:45231400	2.34777e-20	48.125	CG-HYPER-GB-DEG-DOWN
XLOC_021331	-1.48436	0.04145	Ca7-31822301:31822450	2.10337e-27	50.7385	CG-HYPER-GB-DEG-DOWN
XLOC_020451	-1.2	0.0133	Ca7-5630951:5631100	1.01902e-17	43.6805	CG-HYPER-GB-DEG-DOWN
XLOC_021765	-1.17558	0.0001	Ca7-676851:676950	1.57684e-11	36.1956	CG-HYPER-GB-DEG-DOWN
XLOC_023660	-1.08154	0.01315	Ca8-1921151:1921300	1.89604e-06	27.0873	CG-HYPER-GB-DEG-DOWN
XLOC_022903	-1.05963	0.04905	Ca7-31366001:31366150	5.19336e-10	29.3468	CG-HYPER-GB-DEG-DOWN
XLOC_014926	-1.01314	0.0003	Ca5-29468451:29468550	1.40146e-17	26.6186	CG-HYPER-GB-DEG-DOWN
XLOC_008004	-0.891746	0.0375	Ca3-25175401:25175500	4.71279e-07	26.7729	CG-HYPER-GB-DEG-DOWN
XLOC_008271	-0.841177	0.0047	Ca3-30881351:30881450	6.69172e-20	31.2349	CG-HYPER-GB-DEG-DOWN
XLOC_011187	-0.822437	0.04615	Ca4-9332051:9332200	3.08465e-12	39.4099	CG-HYPER-GB-DEG-DOWN
XLOC_005045	-0.790288	0.0134	Ca2-9962551:9962650	2.92981e-15	27.8964	CG-HYPER-GB-DEG-DOWN
XLOC_005045	-0.790288	0.0134	Ca2-9965551:9965650	1.03948e-22	44.5157	CG-HYPER-GB-DEG-DOWN
XLOC_017087	-0.753161	0.01475	Ca6-23252751:23252850	2.10412e-10	34.4166	CG-HYPER-GB-DEG-DOWN
XLOC_009366	-0.637188	0.03395	Ca4-9113951:9114050	2.28096e-15	38.7097	CG-HYPER-GB-DEG-DOWN
XLOC_023226	0.583608	0.0394	Ca7-41557251:41557400	5.26087e-09	31.9674	CG-HYPER-GB-DEG-UP
XLOC_020160	0.853798	0.0058	Ca7-87651:87750	3.01731e-11	33.2167	CG-HYPER-GB-DEG-UP
XLOC_002104	0.863077	0.0495	Ca1-6388001:6388150	6.57727e-58	44.4591	CG-HYPER-GB-DEG-UP
XLOC_019069	1.33457	0.0105	Ca6-24416651:24416800	7.77938e-09	26.1251	CG-HYPER-GB-DEG-UP
XLOC_019122	-1.37538	5e-05	Ca6-26816351:26816450	5.03233e-10	-37.6025	CG-HYPO-FLANKING (2KB)-DEG-DOWN
XLOC_005027	-1.09028	0.0418	Ca2-9338051:9338150	8.29498e-40	-69.5652	CG-HYPO-FLANKING (2KB)-DEG-DOWN
XLOC_005259	-0.931985	0.00125	Ca2-18928851:18928950	1.88823e-78	-79.1506	CG-HYPO-FLANKING (2KB)-DEG-DOWN
XLOC_017137	-0.714696	0.02675	Ca6-24168101:24168200	5.96472e-14	-28.0593	CG-HYPO-FLANKING (2KB)-DEG-DOWN
XLOC_020402	-0.5974	0.03485	Ca7-4676201:4676350	4.30256e-14	-26.9592	CG-HYPO-FLANKING (2KB)-DEG-DOWN
XLOC_000231	-0.582335	0.0384	Ca1-1420501:1420600	2.06639e-18	-26.4631	CG-HYPO-FLANKING (2KB)-DEG-DOWN
XLOC_006873	-0.615855	0.02785	Ca3-30796151:30796250	9.33871e-13	-25.9566	CG-HYPO-FLANKING (-2KB)-DEG-DOWN
XLOC_006873	-0.615855	0.02785	Ca3-30796351:30796450	1.1681e-13	-25.2061	CG-HYPO-FLANKING (-2KB)-DEG-DOWN
XLOC_020402	-0.5974	0.03485	Ca7-4678401:4678550	8.23437e-09	-34.08	CG-HYPO-FLANKING (-2KB)-DEG-DOWN
XLOC_009569	-inf	0.0003	Ca4-13547251:13547450	1.6399e-82	-60.5265	CG-HYPO-FLANKING (-2KB)-DEG-DOWN
XLOC_023226	0.583608	0.0394	Ca7-41550751:41550900	1.84399e-08	-27.315	CG-HYPO-FLANKING (2KB)-DEG-UP
XLOC_000985	0.639489	0.0388	Ca1-15199001:15199100	5.73195e-08	-33.388	CG-HYPO-FLANKING (-2KB)-DEG-UP
XLOC_001226	0.916902	0.0022	Ca1-21960101:21960250	5.87712e-29	-32.0028	CG-HYPO-FLANKING (-2KB)-DEG-UP
XLOC_006348	-1.66642	0.00045	Ca3-18530701:18530800	3.98008e-06	-30.3852	CG-HYPO-GB-DEG-DOWN
XLOC_000430	-1.62364	5e-05	Ca1-4673301:4673400	8.58751e-09	-33.0038	CG-HYPO-GB-DEG-DOWN
XLOC_009570	-1.52146	0.0342	Ca4-13552101:13552250	8.48662e-35	-35.8249	CG-HYPO-GB-DEG-DOWN
XLOC_011338	-1.40801	0.0234	Ca4-12706451:12706550	9.24233e-10	-27.7711	CG-HYPO-GB-DEG-DOWN
XLOC_007801	-1.29179	0.0001	Ca3-20505751:20505850	2.65533e-11	-26.5582	CG-HYPO-GB-DEG-DOWN
XLOC_007801	-1.29179	0.0001	Ca3-20507201:20507300	1.02647e-07	-28.6808	CG-HYPO-GB-DEG-DOWN
XLOC_013381	-1.21298	0.0095	Ca5-31633651:31633750	1.4631e-07	-29.6013	CG-HYPO-GB-DEG-DOWN
XLOC_025034	-1.13839	0.01245	Ca8-16156551:16156700	1.5055e-29	-55.3615	CG-HYPO-GB-DEG-DOWN
XLOC_020898	-1.00743	0.02745	Ca7-14934651:14934750	2.25303e-17	-38.5647	CG-HYPO-GB-DEG-DOWN
XLOC_009055	-0.871214	0.02575	Ca4-3108551:3108650	4.39009e-12	-33.8837	CG-HYPO-GB-DEG-DOWN
XLOC_000230	-0.867502	0.0033	Ca1-1420501:1420600	2.06639e-18	-26.4631	CG-HYPO-GB-DEG-DOWN
XLOC_005045	-0.790288	0.0134	Ca2-9961301:9961400	4.35963e-26	-27.7778	CG-HYPO-GB-DEG-DOWN
XLOC_005045	-0.790288	0.0134	Ca2-9965101:9965200	3.48921e-09	-27.5589	CG-HYPO-GB-DEG-DOWN
XLOC_003113	-0.760992	0.04725	Ca1-38266151:38266250	1.63431e-15	-28.6822	CG-HYPO-GB-DEG-DOWN
XLOC_017772	-0.632012	0.0344	Ca6-53225301:53225400	4.273e-23	-27.8939	CG-HYPO-GB-DEG-DOWN
XLOC_004425	-0.623226	0.04105	Ca2-31306051:31306200	1.7648e-11	-36.1945	CG-HYPO-GB-DEG-DOWN
XLOC_006873	-0.615855	0.02785	Ca3-30789451:30789550	1.26262e-12	-26.2617	CG-HYPO-GB-DEG-DOWN
XLOC_020402	-0.5974	0.03485	Ca7-4676201:4676350	4.30256e-14	-26.9592	CG-HYPO-GB-DEG-DOWN
XLOC_023226	0.583608	0.0394	Ca7-41553101:41553250	7.79761e-60	-46.6033	CG-HYPO-GB-DEG-UP
XLOC_015412	0.812918	0.00585	Ca5-38701051:38701200	2.74528e-53	-33.2568	CG-HYPO-GB-DEG-UP
XLOC_001226	0.916902	0.0022	Ca1-21960101:21960250	5.87712e-29	-32.0028	CG-HYPO-GB-DEG-UP
XLOC_017940	0.944227	0.04675	Ca6-58705401:58705500	1.08674e-12	-33.6834	CG-HYPO-GB-DEG-UP
XLOC_020146	1.14047	0.04305	Ca6-57556001:57556150	1.44009e-155	-71.9242	CG-HYPO-GB-DEG-UP
XLOC_003165	1.36176	0.02055	Ca1-40819801:40819900	4.60535e-07	-31.1111	CG-HYPO-GB-DEG-UP
XLOC_015862	-inf	5e-05	Ca5-2183501:2183650	9.45321e-10	28.8737	CHG-HYPER-FLANKING (2KB)-DEG-DOWN
XLOC_015862	-inf	5e-05	Ca5-2183601:2183750	8.70837e-12	31.4878	CHG-HYPER-FLANKING (2KB)-DEG-DOWN
XLOC_015862	-inf	5e-05	Ca5-2184351:2184450	5.38429e-10	27.8772	CHG-HYPER-FLANKING (2KB)-DEG-DOWN
XLOC_003306	-inf	5e-05	Ca1-46531001:46531150	2.14895e-07	34.1162	CHG-HYPER-FLANKING (2KB)-DEG-DOWN
XLOC_005634	-3.10484	0.03185	Ca2-31962801:31962950	1.9311e-14	30.5947	CHG-HYPER-GB-DEG-DOWN
XLOC_001851	-0.714846	0.0363	Ca1-1752001:1752100	7.63816e-07	25.1671	CHG-HYPER-GB-DEG-DOWN
XLOC_003306	-inf	5e-05	Ca1-46531951:46532100	2.87888e-22	26.3918	CHG-HYPER-GB-DEG-DOWN
XLOC_015862	-inf	5e-05	Ca5-2185651:2185750	3.81618e-10	27.3196	CHG-HYPER-GB-DEG-DOWN
XLOC_009569	-inf	0.0003	Ca4-13546001:13546100	6.488e-09	-33.8295	CHG-HYPO-FLANKING (-2KB)-DEG-DOWN
XLOC_005027	-1.09028	0.0418	Ca2-9337151:9337250	2.10695e-06	18.6988	CHH-HYPER-FLANKING (2KB)-DEG-DOWN
XLOC_005519	-0.98256	0.002	Ca2-29462351:29462500	2.38113e-06	18.3849	CHH-HYPER-FLANKING (2KB)-DEG-DOWN
XLOC_005259	-0.931985	0.00125	Ca2-18928851:18929050	5.79044e-13	33.0893	CHH-HYPER-FLANKING (2KB)-DEG-DOWN
XLOC_005259	-0.931985	0.00125	Ca2-18929051:18929250	5.27857e-09	28.9013	CHH-HYPER-FLANKING (2KB)-DEG-DOWN
XLOC_006534	-0.670705	0.0257	Ca3-23579001:23579100	3.01471e-09	25.7289	CHH-HYPER-FLANKING (2KB)-DEG-DOWN
XLOC_020195	-0.630638	0.02255	Ca7-932951:933050	1.76863e-06	19.2003	CHH-HYPER-FLANKING (2KB)-DEG-DOWN
XLOC_019726	-1.10413	0.00015	Ca6-53822901:53823000	3.07621e-14	32.4884	CHH-HYPER-FLANKING (-2KB)-DEG-DOWN
XLOC_016762	-0.84729	0.0352	Ca6-15435651:15435750	8.19696e-06	16.1484	CHH-HYPER-FLANKING (-2KB)-DEG-DOWN
XLOC_002101	-0.834047	0.03145	Ca1-6354651:6354800	3.15085e-07	25.0176	CHH-HYPER-FLANKING (-2KB)-DEG-DOWN
XLOC_020474	-0.811714	0.01105	Ca7-6091251:6091400	1.2354e-05	17.9714	CHH-HYPER-FLANKING (-2KB)-DEG-DOWN
XLOC_006429	0.652761	0.0241	Ca3-20963801:20963900	1.40471e-05	25.7837	CHH-HYPER-FLANKING (2KB)-DEG-UP
XLOC_013160	0.782203	0.00655	Ca5-26230901:26231000	5.96785e-06	16.8142	CHH-HYPER-FLANKING (2KB)-DEG-UP
XLOC_023818	1.12291	0.0004	Ca8-4707001:4707100	5.49279e-06	17.7044	CHH-HYPER-FLANKING (2KB)-DEG-UP
XLOC_020146	1.14047	0.04305	Ca6-57555751:57555850	3.8571e-09	34.2929	CHH-HYPER-FLANKING (2KB)-DEG-UP
XLOC_010021	1.19769	0.01025	Ca4-26761951:26762050	1.33576e-06	19.7302	CHH-HYPER-FLANKING (2KB)-DEG-UP
XLOC_010021	1.19769	0.01025	Ca4-26762651:26762750	3.42529e-09	23.6361	CHH-HYPER-FLANKING (2KB)-DEG-UP
XLOC_015991	inf	0.001	Ca5-39292551:39292650	1.56014e-06	26.6192	CHH-HYPER-FLANKING (2KB)-DEG-UP
XLOC_008543	0.857706	0.025	Ca3-36385801:36385950	1.5524e-13	21.4602	CHH-HYPER-FLANKING (-2KB)-DEG-UP
XLOC_017854	-1.10979	0.03385	Ca6-56583451:56583550	8.71023e-07	18.5413	CHH-HYPER-GB-DEG-DOWN
XLOC_006774	-0.873068	0.01665	Ca3-28875401:28875500	5.22649e-11	20.6565	CHH-HYPER-GB-DEG-DOWN
XLOC_001246	-0.813351	0.02825	Ca1-22667701:22667800	9.46864e-07	25.7466	CHH-HYPER-GB-DEG-DOWN
XLOC_001246	-0.813351	0.02825	Ca1-22682101:22682200	1.04557e-05	17.4963	CHH-HYPER-GB-DEG-DOWN
XLOC_018338	0.892767	0.0051	Ca6-7896551:7896650	2.16388e-06	19.2856	CHH-HYPER-GB-DEG-UP
XLOC_020146	1.14047	0.04305	Ca6-57555751:57555850	3.8571e-09	34.2929	CHH-HYPER-GB-DEG-UP
XLOC_017265	1.28138	0.0001	Ca6-29121051:29121150	6.55683e-06	15.3995	CHH-HYPER-GB-DEG-UP
XLOC_015059	-1.33644	0.0031	Ca5-31762351:31762450	8.73723e-06	-20.2499	CHH-HYPO-FLANKING (2KB)-DEG-DOWN
XLOC_015058	-1.17039	0.02635	Ca5-31762351:31762450	8.73723e-06	-20.2499	CHH-HYPO-FLANKING (2KB)-DEG-DOWN
XLOC_006032	-0.823112	0.0096	Ca3-4205351:4205450	1.15763e-09	-35.5449	CHH-HYPO-FLANKING (2KB)-DEG-DOWN
XLOC_008810	-0.71298	0.0087	Ca3-18852051:18852150	2.57038e-19	-19.32	CHH-HYPO-FLANKING (2KB)-DEG-DOWN
XLOC_006348	-1.66642	0.00045	Ca3-18534401:18534500	3.60257e-09	-26.9426	CHH-HYPO-FLANKING (-2KB)-DEG-DOWN
XLOC_023184	-1.57804	5e-05	Ca7-39798751:39798850	1.03521e-05	-15.6948	CHH-HYPO-FLANKING (-2KB)-DEG-DOWN
XLOC_023184	-1.57804	5e-05	Ca7-39799051:39799150	1.73741e-07	-20.6748	CHH-HYPO-FLANKING (-2KB)-DEG-DOWN
XLOC_022941	-1.02666	0.00025	Ca7-32132151:32132250	6.11301e-09	-20.9668	CHH-HYPO-FLANKING (-2KB)-DEG-DOWN
XLOC_019143	-0.93812	0.02635	Ca6-27391801:27391950	2.06459e-06	-15.2944	CHH-HYPO-FLANKING (-2KB)-DEG-DOWN
XLOC_021425	-0.761298	0.044	Ca7-34656751:34656850	8.97811e-06	-26.434	CHH-HYPO-FLANKING (-2KB)-DEG-DOWN
XLOC_006180	-0.68514	0.01865	Ca3-10493951:10494100	8.39081e-06	-16.4176	CHH-HYPO-FLANKING (-2KB)-DEG-DOWN
XLOC_011946	0.613917	0.0323	Ca4-33054201:33054300	2.89611e-05	-16.0783	CHH-HYPO-FLANKING (-2KB)-DEG-UP
XLOC_004314	0.94894	0.00405	Ca2-27924051:27924150	2.73555e-05	-16.6604	CHH-HYPO-FLANKING (-2KB)-DEG-UP
XLOC_023184	-1.57804	5e-05	Ca7-39787501:39787600	1.06626e-08	-19.9963	CHH-HYPO-GB-DEG-DOWN
XLOC_023929	-1.23472	5e-05	Ca8-6581301:6581400	5.62e-07	-15.097	CHH-HYPO-GB-DEG-DOWN
XLOC_015640	-0.930212	0.00095	Ca5-43792951:43793050	8.78797e-07	-16.0676	CHH-HYPO-GB-DEG-DOWN
XLOC_024643	-0.888347	0.0185	Ca8-6347451:6347550	2.34952e-05	-15.759	CHH-HYPO-GB-DEG-DOWN
XLOC_001246	-0.813351	0.02825	Ca1-22662451:22662550	7.16532e-06	-17.2513	CHH-HYPO-GB-DEG-DOWN
XLOC_003930	0.711746	0.0433	Ca2-11329201:11329350	6.6509e-07	-17.5796	CHH-HYPO-GB-DEG-UP
XLOC_018338	0.892767	0.0051	Ca6-7896901:7897000	1.43223e-05	-22.3992	CHH-HYPO-GB-DEG-UP
XLOC_003165	1.36176	0.02055	Ca1-40895051:40895200	1.8205e-06	-17.3873	CHH-HYPO-GB-DEG-UP

## Sheet: DMR-DEG-ST
test_id	log2(fold_change)	p_value	DMR	pvalue	meth.diff	CONTEXT
XLOC_019743	-0.794371	0.0353	Ca6-54240751:54240850	1.53202e-12	28.6556	CG-HYPER-FLANKING (2KB) DEG-DOWN
XLOC_015643	-0.622433	0.0446	Ca5-43835551:43835650	3.31093e-08	26.0204	CG-HYPER-FLANKING (2KB) DEG-DOWN
XLOC_012577	-2.38082	0.0288	Ca4-42822451:42822550	4.83427e-08	27.2065	CG-HYPER-FLANKING (-2KB) DEG-DOWN
XLOC_013215	-1.35733	0.0401	Ca5-27872251:27872400	5.89059e-10	31.8147	CG-HYPER-FLANKING (-2KB) DEG-DOWN
XLOC_001096	-0.639419	0.0405	Ca1-17987151:17987300	6.19338e-14	43.874	CG-HYPER-FLANKING (-2KB) DEG-DOWN
XLOC_004773	0.605671	0.0446	Ca2-2225201:2225300	4.62342e-05	25.0274	CG-HYPER-FLANKING (2KB) DEG-UP
XLOC_001071	0.815505	0.02065	Ca1-17483051:17483200	9.23644e-11	31.575	CG-HYPER-FLANKING (2KB) DEG-UP
XLOC_004655	1.14246	5e-05	Ca2-36038951:36039050	4.82992e-15	37.4486	CG-HYPER-FLANKING (-2KB) DEG-UP
XLOC_001226	1.29501	5e-05	Ca1-21960551:21960700	7.96362e-16	38.9808	CG-HYPER-FLANKING (-2KB) DEG-UP
XLOC_011596	1.33023	0.01975	Ca4-17898901:17899000	3.57884e-16	29.7619	CG-HYPER-FLANKING (-2KB) DEG-UP
XLOC_011596	1.33023	0.01975	Ca4-17899051:17899250	5.66294e-10	28.6589	CG-HYPER-FLANKING (-2KB) DEG-UP
XLOC_013422	1.34918	0.0248	Ca5-32438151:32438250	2.64748e-06	27.7788	CG-HYPER-FLANKING (-2KB) DEG-UP
XLOC_013215	-1.35733	0.0401	Ca5-27872251:27872400	5.89059e-10	31.8147	CG-HYPER-GB-DEG-DOWN
XLOC_022980	-0.916505	0.041	Ca7-33410301:33410500	4.63853e-13	36.4006	CG-HYPER-GB-DEG-DOWN
XLOC_020408	-0.754094	0.02645	Ca7-4812551:4812650	8.37107e-08	26.8618	CG-HYPER-GB-DEG-DOWN
XLOC_008449	-0.658096	0.0239	Ca3-35029851:35030000	1.6696e-20	32.6457	CG-HYPER-GB-DEG-DOWN
XLOC_011542	0.667098	0.02385	Ca4-16887101:16887250	3.64591e-13	30.1898	CG-HYPER-GB-DEG-UP
XLOC_023820	0.717411	0.04865	Ca8-4717951:4718100	5.68519e-12	34.7509	CG-HYPER-GB-DEG-UP
XLOC_016084	0.722998	0.01455	Ca6-1296101:1296250	8.54383e-17	31.257	CG-HYPER-GB-DEG-UP
XLOC_016084	0.722998	0.01455	Ca6-1296251:1296350	2.3357e-16	44.5579	CG-HYPER-GB-DEG-UP
XLOC_013255	0.774807	0.04595	Ca5-28965601:28965750	2.66047e-07	29.4993	CG-HYPER-GB-DEG-UP
XLOC_001071	0.815505	0.02065	Ca1-17485351:17485450	1.25155e-17	41.1295	CG-HYPER-GB-DEG-UP
XLOC_023534	0.959317	0.01935	Ca8-121251:121350	4.46107e-21	55.597	CG-HYPER-GB-DEG-UP
XLOC_009021	0.9615	0.0057	Ca4-2377001:2377150	1.1969e-10	30.6225	CG-HYPER-GB-DEG-UP
XLOC_009021	0.9615	0.0057	Ca4-2377851:2377950	1.91857e-09	30.3215	CG-HYPER-GB-DEG-UP
XLOC_009021	0.9615	0.0057	Ca4-2378001:2378150	9.42526e-14	35.3939	CG-HYPER-GB-DEG-UP
XLOC_010296	0.986202	0.0178	Ca4-38302751:38302850	6.11077e-08	35.2329	CG-HYPER-GB-DEG-UP
XLOC_003113	1.02107	0.0101	Ca1-38266101:38266200	1.46021e-10	26.4214	CG-HYPER-GB-DEG-UP
XLOC_003312	1.17489	0.0023	Ca1-46778401:46778550	3.87789e-08	26.3922	CG-HYPER-GB-DEG-UP
XLOC_002086	-0.993136	0.02425	Ca1-6099451:6099600	8.67069e-09	-30.9243	CG-HYPO-FLANKING (2KB) DEG-DOWN
XLOC_022725	-inf	0.00505	Ca7-25360001:25360100	3.68953e-16	-27.0695	CG-HYPO-FLANKING (2KB) DEG-DOWN
XLOC_018438	1.37457	0.00615	Ca6-9854151:9854300	8.29905e-07	-29.0323	CG-HYPO-FLANKING (2KB) DEG-UP
XLOC_023261	2.62663	0.04025	Ca7-43623151:43623250	0.000129523	-25.6415	CG-HYPO-FLANKING (2KB) DEG-UP
XLOC_022445	0.649471	0.02745	Ca7-15121551:15121650	1.77715e-08	-30.2236	CG-HYPO-FLANKING (-2KB) DEG-UP
XLOC_001723	1.68829	0.0266	Ca1-47917251:47917350	2.63638e-12	-38.4553	CG-HYPO-FLANKING (-2KB) DEG-UP
XLOC_003172	1.80353	5e-05	Ca1-41057801:41057900	3.68125e-09	-29.6296	CG-HYPO-FLANKING (-2KB) DEG-UP
XLOC_019720	-1.30404	0.0303	Ca6-53698351:53698450	6.75055e-11	-32.4782	CG-HYPO-GB-DEG-DOWN
XLOC_024467	-1.12623	0.0346	Ca8-2746651:2746800	2.84441e-08	-25.1161	CG-HYPO-GB-DEG-DOWN
XLOC_002284	-1.10861	0.03595	Ca1-10194551:10194650	1.50073e-06	-26.3768	CG-HYPO-GB-DEG-DOWN
XLOC_002086	-0.993136	0.02425	Ca1-6099451:6099600	8.67069e-09	-30.9243	CG-HYPO-GB-DEG-DOWN
XLOC_016760	-0.771863	0.01135	Ca6-15362401:15362500	3.00189e-05	-27.6723	CG-HYPO-GB-DEG-DOWN
XLOC_009920	0.721013	0.045	Ca4-22182301:22182400	8.23869e-17	-34.5203	CG-HYPO-GB-DEG-UP
XLOC_022710	0.74851	0.0291	Ca7-24182601:24182700	1.32408e-08	-30.7093	CG-HYPO-GB-DEG-UP
XLOC_013659	0.762043	0.02955	Ca5-36914801:36914900	6.78358e-13	-38.3409	CG-HYPO-GB-DEG-UP
XLOC_014314	0.804039	0.0401	Ca5-4886751:4886850	4.40994e-14	-32.3524	CG-HYPO-GB-DEG-UP
XLOC_023801	0.943584	0.0082	Ca8-4493101:4493250	1.05125e-12	-26.936	CG-HYPO-GB-DEG-UP
XLOC_001141	0.966277	0.0087	Ca1-19399451:19399550	6.31216e-13	-28.5864	CG-HYPO-GB-DEG-UP
XLOC_003874	1.12743	0.0196	Ca2-9460801:9460900	4.17403e-09	-28.0602	CG-HYPO-GB-DEG-UP
XLOC_004003	1.7711	0.04895	Ca2-13994751:13994850	1.72107e-07	-27.724	CG-HYPO-GB-DEG-UP
XLOC_003172	1.80353	5e-05	Ca1-41055651:41055750	1.66303e-08	-30.6935	CG-HYPO-GB-DEG-UP
XLOC_017867	2.01622	0.00015	Ca6-56887401:56887500	2.04171e-08	-27.1256	CG-HYPO-GB-DEG-UP
XLOC_017867	2.01622	0.00015	Ca6-56887551:56887650	3.27465e-08	-26.1338	CG-HYPO-GB-DEG-UP
XLOC_023456	3.22972	5e-05	Ca7-19841001:19841100	6.25425e-07	-27.4568	CG-HYPO-GB-DEG-UP
XLOC_000246	inf	0.00035	Ca1-1604601:1604700	9.66394e-13	-27.9703	CG-HYPO-GB-DEG-UP
XLOC_003500	inf	5e-05	Ca1-31300451:31300650	3.58684e-06	-28.126	CG-HYPO-GB-DEG-UP
XLOC_023524	-1.7249	0.0094	Ca7-44493501:44493600	1.33787e-11	33.2449	CHG-HYPER-FLANKING (-2KB) DEG-DOWN
XLOC_001096	-0.639419	0.0405	Ca1-17987551:17987650	1.178e-20	41.466	CHG-HYPER-FLANKING (-2KB) DEG-DOWN
XLOC_001096	-0.639419	0.0405	Ca1-17987701:17987800	4.67707e-16	36.1046	CHG-HYPER-FLANKING (-2KB) DEG-DOWN
XLOC_001071	0.815505	0.02065	Ca1-17483101:17483200	1.51726e-08	32.0489	CHG-HYPER-FLANKING (2KB) DEG-UP
XLOC_001071	0.815505	0.02065	Ca1-17483751:17483850	5.4808e-06	25.4749	CHG-HYPER-FLANKING (2KB) DEG-UP
XLOC_022725	-inf	0.00505	Ca7-25360001:25360200	5.29227e-07	-25.8903	CHG-HYPO-FLANKING (2KB) DEG-DOWN
XLOC_001230	inf	0.0001	Ca1-22087351:22087500	2.4856e-08	-27.6007	CHG-HYPO-FLANKING (2KB) DEG-UP
XLOC_001231	inf	5e-05	Ca1-22087351:22087500	2.4856e-08	-27.6007	CHG-HYPO-FLANKING (2KB) DEG-UP
XLOC_001231	inf	5e-05	Ca1-22087751:22087850	1.37694e-07	-28.3332	CHG-HYPO-FLANKING (2KB) DEG-UP
XLOC_003500	inf	5e-05	Ca1-31299801:31299900	5.54143e-10	-32.344	CHG-HYPO-FLANKING (2KB) DEG-UP
XLOC_001230	inf	0.0001	Ca1-22087751:22087850	1.37694e-07	-28.3332	CHG-HYPO-FLANKING (-2KB) DEG-UP
XLOC_003482	inf	5e-05	Ca1-22087351:22087500	2.4856e-08	-27.6007	CHG-HYPO-FLANKING (-2KB) DEG-UP
XLOC_003482	inf	5e-05	Ca1-22087751:22087850	1.37694e-07	-28.3332	CHG-HYPO-FLANKING (-2KB) DEG-UP
XLOC_003487	inf	0.00235	Ca1-24492951:24493100	3.00948e-27	-50.2582	CHG-HYPO-FLANKING (-2KB) DEG-UP
XLOC_003487	inf	0.00235	Ca1-24493051:24493250	8.23072e-19	-35.1046	CHG-HYPO-FLANKING (-2KB) DEG-UP
XLOC_022941	-1.3072	0.0007	Ca7-32129951:32130050	7.05985e-09	-29.7355	CHG-HYPO-GB-DEG-DOWN
XLOC_017867	2.01622	0.00015	Ca6-56887551:56887700	5.99822e-09	-30.6741	CHG-HYPO-GB-DEG-UP
XLOC_017867	2.01622	0.00015	Ca6-56887901:56888050	3.31189e-16	-38.7083	CHG-HYPO-GB-DEG-UP
XLOC_017867	2.01622	0.00015	Ca6-56888201:56888300	2.09439e-08	-31.0962	CHG-HYPO-GB-DEG-UP
XLOC_001230	inf	0.0001	Ca1-22087351:22087500	2.4856e-08	-27.6007	CHG-HYPO-GB-DEG-UP
XLOC_011889	inf	5e-05	Ca4-30290851:30291050	1.81695e-08	-31.6361	CHG-HYPO-GB-DEG-UP
XLOC_009558	-1.23279	0.00015	Ca4-13287901:13288000	1.00186e-10	36.1482	CHH-HYPER-FLANKING (2KB) DEG-DOWN
XLOC_024544	-1.22517	0.00025	Ca8-4288801:4288950	9.64084e-06	18.5317	CHH-HYPER-FLANKING (2KB) DEG-DOWN
XLOC_005407	-0.924949	0.0092	Ca2-26564301:26564400	1.77996e-06	17.9291	CHH-HYPER-FLANKING (2KB) DEG-DOWN
XLOC_019126	-0.918191	0.0069	Ca6-26884001:26884150	9.7583e-06	17.6976	CHH-HYPER-FLANKING (2KB) DEG-DOWN
XLOC_021943	-1.62566	0.002	Ca7-3833751:3833850	6.97337e-07	15.2051	CHH-HYPER-FLANKING (-2KB) DEG-DOWN
XLOC_019692	-1.34265	0.01555	Ca6-52576001:52576100	6.32165e-06	23.15	CHH-HYPER-FLANKING (-2KB) DEG-DOWN
XLOC_024544	-1.22517	0.00025	Ca8-4291851:4291950	1.47522e-06	19.7387	CHH-HYPER-FLANKING (-2KB) DEG-DOWN
XLOC_006774	-0.959446	0.02265	Ca3-28875701:28875850	1.25217e-09	26.2172	CHH-HYPER-FLANKING (-2KB) DEG-DOWN
XLOC_022199	-0.857213	0.0063	Ca7-8424501:8424700	9.87122e-06	23.059	CHH-HYPER-FLANKING (-2KB) DEG-DOWN
XLOC_016436	-0.809988	0.0178	Ca6-7959001:7959100	3.06729e-06	27.7286	CHH-HYPER-FLANKING (-2KB) DEG-DOWN
XLOC_002526	-0.766603	0.0124	Ca1-14632851:14632950	1.85341e-09	20.976	CHH-HYPER-FLANKING (-2KB) DEG-DOWN
XLOC_008376	-inf	0.0078	Ca3-33011401:33011500	6.72797e-06	16.044	CHH-HYPER-FLANKING (-2KB) DEG-DOWN
XLOC_019955	0.631558	0.04365	Ca6-3384951:3385050	9.44328e-07	18.2742	CHH-HYPER-FLANKING (2KB) DEG-UP
XLOC_002379	0.660253	0.0481	Ca1-11755751:11755850	1.6152e-10	22.645	CHH-HYPER-FLANKING (2KB) DEG-UP
XLOC_009044	0.781528	0.0188	Ca4-2882601:2882700	3.93046e-06	15.5344	CHH-HYPER-FLANKING (2KB) DEG-UP
XLOC_009711	0.794881	0.02895	Ca4-16220551:16220650	9.75214e-08	17.1908	CHH-HYPER-FLANKING (2KB) DEG-UP
XLOC_004286	0.798896	0.0118	Ca2-26741701:26741800	1.80681e-05	15.6082	CHH-HYPER-FLANKING (2KB) DEG-UP
XLOC_008120	0.82513	0.01785	Ca3-27822901:27823050	2.11804e-09	23.9382	CHH-HYPER-FLANKING (2KB) DEG-UP
XLOC_008572	0.930272	0.0031	Ca3-36766401:36766500	2.97104e-06	16.0753	CHH-HYPER-FLANKING (2KB) DEG-UP
XLOC_002479	1.00763	0.0342	Ca1-13605301:13605400	3.79922e-06	18.4283	CHH-HYPER-FLANKING (2KB) DEG-UP
XLOC_013190	1.09822	0.0133	Ca5-27113051:27113150	9.52381e-08	19.7726	CHH-HYPER-FLANKING (2KB) DEG-UP
XLOC_011596	1.33023	0.01975	Ca4-17895351:17895450	1.02784e-05	16.4577	CHH-HYPER-FLANKING (2KB) DEG-UP
XLOC_017092	1.35057	0.00045	Ca6-23370451:23370550	1.09288e-07	18.1599	CHH-HYPER-FLANKING (2KB) DEG-UP
XLOC_003487	inf	0.00235	Ca1-24492051:24492200	3.27537e-10	26.5736	CHH-HYPER-FLANKING (2KB) DEG-UP
XLOC_020687	0.585709	0.04115	Ca7-10139351:10139450	2.49284e-06	15.339	CHH-HYPER-FLANKING (-2KB) DEG-UP
XLOC_021082	0.639732	0.03275	Ca7-21582801:21582900	1.52407e-06	23.4771	CHH-HYPER-FLANKING (-2KB) DEG-UP
XLOC_016215	0.64393	0.02195	Ca6-3943601:3943750	2.8109e-06	16.7946	CHH-HYPER-FLANKING (-2KB) DEG-UP
XLOC_015008	0.838072	0.02015	Ca5-30908651:30908750	2.38557e-06	29.9489	CHH-HYPER-FLANKING (-2KB) DEG-UP
XLOC_020850	0.913504	0.00535	Ca7-13769901:13770000	7.8298e-07	18.1502	CHH-HYPER-FLANKING (-2KB) DEG-UP
XLOC_010695	0.985493	0.0022	Ca4-48971651:48971750	1.40019e-05	20.0625	CHH-HYPER-FLANKING (-2KB) DEG-UP
XLOC_006026	1.20555	0.02	Ca3-3901551:3901650	2.4659e-07	22.537	CHH-HYPER-FLANKING (-2KB) DEG-UP
XLOC_004003	1.7711	0.04895	Ca2-13999601:13999700	2.38965e-06	16.4362	CHH-HYPER-FLANKING (-2KB) DEG-UP
XLOC_007158	5.60505	5e-05	Ca3-36908551:36908650	7.54153e-10	18.3393	CHH-HYPER-FLANKING (-2KB) DEG-UP
XLOC_023184	-2.90407	5e-05	Ca7-39789651:39789750	1.86641e-06	21.2366	CHH-HYPER-GB-DEG-DOWN
XLOC_021797	-0.82732	0.00615	Ca7-1144901:1145000	3.10311e-09	42.3045	CHH-HYPER-GB-DEG-DOWN
XLOC_023929	-0.78828	0.01295	Ca8-6579351:6579450	1.4341e-07	15.5609	CHH-HYPER-GB-DEG-DOWN
XLOC_009920	0.721013	0.045	Ca4-22185001:22185100	3.48678e-07	18.1861	CHH-HYPER-GB-DEG-UP
XLOC_018338	0.816804	0.02725	Ca6-7896601:7896700	4.02416e-07	20.8822	CHH-HYPER-GB-DEG-UP
XLOC_002533	0.820474	0.01005	Ca1-14695251:14695350	4.72599e-07	18.2736	CHH-HYPER-GB-DEG-UP
XLOC_008120	0.82513	0.01785	Ca3-27829401:27829500	5.18531e-06	17.092	CHH-HYPER-GB-DEG-UP
XLOC_001226	1.29501	5e-05	Ca1-21957951:21958100	1.99723e-05	21.1389	CHH-HYPER-GB-DEG-UP
XLOC_013312	1.37887	0.01055	Ca5-30404951:30405050	2.70341e-06	15.6516	CHH-HYPER-GB-DEG-UP
XLOC_017505	1.88612	5e-05	Ca6-41384351:41384450	5.50173e-06	26.2406	CHH-HYPER-GB-DEG-UP
XLOC_019995	-1.75345	0.00025	Ca6-9776551:9776650	2.61086e-10	-21.4216	CHH-HYPO-FLANKING (2KB) DEG-DOWN
XLOC_023523	-1.64	0.00815	Ca7-44488701:44488800	1.49876e-06	-19.3912	CHH-HYPO-FLANKING (2KB) DEG-DOWN
XLOC_021539	-0.711626	0.0374	Ca7-38409401:38409550	2.24768e-06	-25.1448	CHH-HYPO-FLANKING (2KB) DEG-DOWN
XLOC_002247	-1.80901	0.001	Ca1-9619151:9619250	2.26362e-07	-15.0197	CHH-HYPO-FLANKING (-2KB) DEG-DOWN
XLOC_010154	-1.0561	0.0016	Ca4-32879501:32879600	7.25861e-08	-18.5065	CHH-HYPO-FLANKING (-2KB) DEG-DOWN
XLOC_012497	-1.02549	0.0381	Ca4-10318101:10318200	1.13424e-05	-21.6439	CHH-HYPO-FLANKING (-2KB) DEG-DOWN
XLOC_016643	-0.932087	0.0026	Ca6-12996151:12996250	1.96237e-06	-24.2767	CHH-HYPO-FLANKING (-2KB) DEG-DOWN
XLOC_022714	-0.703867	0.0405	Ca7-24418851:24419000	4.60542e-09	-21.0726	CHH-HYPO-FLANKING (-2KB) DEG-DOWN
XLOC_013478	-inf	0.02445	Ca5-33661251:33661350	7.40155e-06	-24.9506	CHH-HYPO-FLANKING (-2KB) DEG-DOWN
XLOC_019625	1.11584	0.0004	Ca6-50007651:50007800	3.02649e-14	-26.6859	CHH-HYPO-FLANKING (2KB) DEG-UP
XLOC_010814	1.31423	0.002	Ca4-2186601:2186700	3.39863e-08	-22.729	CHH-HYPO-FLANKING (2KB) DEG-UP
XLOC_020946	1.59667	5e-05	Ca7-16370301:16370400	5.78282e-06	-18.7561	CHH-HYPO-FLANKING (2KB) DEG-UP
XLOC_024230	1.6733	0.0204	Ca8-14998001:14998100	6.10056e-07	-27.0238	CHH-HYPO-FLANKING (2KB) DEG-UP
XLOC_004702	1.83574	0.0006	Ca2-255101:255200	8.04516e-08	-22.3344	CHH-HYPO-FLANKING (2KB) DEG-UP
XLOC_018299	5.44949	5e-05	Ca6-7112751:7112900	8.39543e-07	-19.8106	CHH-HYPO-FLANKING (2KB) DEG-UP
XLOC_023719	0.701233	0.0331	Ca8-3006651:3006750	3.27655e-06	-17.1779	CHH-HYPO-FLANKING (-2KB) DEG-UP
XLOC_007419	1.20958	0.0194	Ca3-4331501:4331600	2.87126e-05	-25.8142	CHH-HYPO-FLANKING (-2KB) DEG-UP
XLOC_015687	1.50904	5e-05	Ca5-44922251:44922350	2.2452e-10	-25.2442	CHH-HYPO-FLANKING (-2KB) DEG-UP
XLOC_001723	1.68829	0.0266	Ca1-47917401:47917500	1.61295e-07	-15.0039	CHH-HYPO-FLANKING (-2KB) DEG-UP
XLOC_008779	1.84618	0.0292	Ca3-4331501:4331600	2.87126e-05	-25.8142	CHH-HYPO-FLANKING (-2KB) DEG-UP
XLOC_006297	2.39952	0.00045	Ca3-16596051:16596150	7.94979e-06	-18.3413	CHH-HYPO-FLANKING (-2KB) DEG-UP
XLOC_003165	-1.58608	0.00125	Ca1-40907301:40907450	2.88806e-06	-26.0586	CHH-HYPO-GB-DEG-DOWN
XLOC_003165	-1.58608	0.00125	Ca1-40930101:40930200	2.29941e-06	-20.9152	CHH-HYPO-GB-DEG-DOWN
XLOC_001246	-0.811512	0.04205	Ca1-22667651:22667750	1.2635e-07	-21.5808	CHH-HYPO-GB-DEG-DOWN
XLOC_023719	0.701233	0.0331	Ca8-3006651:3006750	3.27655e-06	-17.1779	CHH-HYPO-GB-DEG-UP
