# Supplementary material for: Unravelling Differential DNA Methylation Patterns in Genotype Dependent Manner under Salinity Stress Response in Chickpea
Source: Int J Mol Sci. 2023 Jan 18;24(3):1863. doi: 10.3390/ijms24031863 (PMC9915442; doi:10.3390/ijms24031863)
Supplement: Supplementary file 1 [file ijms-24-01863-s001.zip › Supplementary Table S8.xlsx]

## Sheet: SS-CG-DMR-DEGs-specific
GO-ID	p-value	x	n	X	N	Description
9607	0.00029147	5	550	30	27594	response to biotic stimulus
46593	0.0010872	1	1	30	27594	mandelonitrile lyase activity
10430	0.0010872	1	1	30	27594	fatty acid omega-oxidation
5215	0.0011602	6	1125	30	27594	transporter activity
22804	0.0020236	4	501	30	27594	active transmembrane transporter activity
4856	0.0021732	1	2	30	27594	xylulokinase activity
51707	0.0024476	4	528	30	27594	response to other organism
6013	0.0032582	1	3	30	27594	mannose metabolic process
15800	0.0043419	1	4	30	27594	acidic amino acid transport
43473	0.0043419	1	4	30	27594	pigmentation
43476	0.0043419	1	4	30	27594	pigment accumulation
43478	0.0043419	1	4	30	27594	pigment accumulation in response to UV light
43479	0.0043419	1	4	30	27594	pigment accumulation in tissues in response to UV light
43480	0.0043419	1	4	30	27594	pigment accumulation in tissues
43481	0.0043419	1	4	30	27594	anthocyanin accumulation in tissues in response to UV light
51704	0.0064653	4	694	30	27594	multi-organism process
15804	0.006506	1	6	30	27594	neutral amino acid transport
4559	0.0075864	1	7	30	27594	alpha-mannosidase activity
15923	0.0086656	1	8	30	27594	mannosidase activity
52317	0.0086656	1	8	30	27594	camalexin metabolic process
10120	0.0086656	1	8	30	27594	camalexin biosynthetic process
42626	0.0087888	2	130	30	27594	ATPase activity, coupled to transmembrane movement of substances
43492	0.0087888	2	130	30	27594	ATPase activity, coupled to movement of substances
9408	0.008919	2	131	30	27594	response to heat
16820	0.0091822	2	133	30	27594	hydrolase activity, acting on acid anhydrides, catalyzing transmembrane movement of substances
52314	0.0097437	1	9	30	27594	phytoalexin metabolic process
52315	0.0097437	1	9	30	27594	phytoalexin biosynthetic process
46217	0.0097437	1	9	30	27594	indole phytoalexin metabolic process
42431	0.0097437	1	9	30	27594	indole metabolic process
9700	0.0097437	1	9	30	27594	indole phytoalexin biosynthetic process
22857	0.012453	4	840	30	27594	transmembrane transporter activity
16832	0.015117	1	14	30	27594	aldehyde-lyase activity
19438	0.015819	2	177	30	27594	aromatic compound biosynthetic process
15405	0.016329	2	180	30	27594	P-P-bond-hydrolysis-driven transmembrane transporter activity
15399	0.0165	2	181	30	27594	primary active transmembrane transporter activity
5388	0.017259	1	16	30	27594	calcium-transporting ATPase activity
15085	0.018328	1	17	30	27594	calcium ion transmembrane transporter activity
80043	0.024718	1	23	30	27594	quercetin 3-O-glucosyltransferase activity
30570	0.02684	1	25	30	27594	pectate lyase activity
16837	0.02684	1	25	30	27594	carbon-oxygen lyase activity, acting on polysaccharides
5887	0.027899	1	26	30	27594	integral to plasma membrane
34440	0.028957	1	27	30	27594	lipid oxidation
16682	0.028957	1	27	30	27594	oxidoreductase activity, acting on diphenols and related substances as donors, oxygen as acceptor
19395	0.028957	1	27	30	27594	fatty acid oxidation
10260	0.031069	1	29	30	27594	organ senescence
6952	0.031319	3	637	30	27594	defense response
30258	0.033177	1	31	30	27594	lipid modification
19829	0.033177	1	31	30	27594	cation-transporting ATPase activity
9626	0.034229	1	32	30	27594	plant-type hypersensitive response
34050	0.03528	1	33	30	27594	host programmed cell death induced by symbiont
42623	0.035367	2	273	30	27594	ATPase activity, coupled
5759	0.03633	1	34	30	27594	mitochondrial matrix
31980	0.03633	1	34	30	27594	mitochondrial lumen
4437	0.03633	1	34	30	27594	inositol or phosphatidylinositol phosphatase activity
22891	0.037356	3	683	30	27594	substrate-specific transmembrane transporter activity
16679	0.037379	1	35	30	27594	oxidoreductase activity, acting on diphenols and related substances as donors
15662	0.037379	1	35	30	27594	ATPase activity, coupled to transmembrane movement of ions, phosphorylative mechanism
45735	0.038427	1	36	30	27594	nutrient reservoir activity
42435	0.039474	1	37	30	27594	indole derivative biosynthetic process
19200	0.04052	1	38	30	27594	carbohydrate kinase activity
6725	0.040957	2	296	30	27594	cellular aromatic compound metabolic process
16829	0.042976	2	304	30	27594	lyase activity
10149	0.04365	1	41	30	27594	senescence
42430	0.04365	1	41	30	27594	indole and derivative metabolic process
42434	0.04365	1	41	30	27594	indole derivative metabolic process
7267	0.044691	1	42	30	27594	cell-cell signaling
9615	0.045732	1	43	30	27594	response to virus
9813	0.048846	1	46	30	27594	flavonoid biosynthetic process
16887	0.049251	2	328	30	27594	ATPase activity
19748	0.049788	2	330	30	27594	secondary metabolic process

## Sheet: ST-CG-DMR-DEGs-sepecific
GO-ID	p-value	corr p-value	x	n	X	N	Description
51186	0.00014851	0.052092	4	219	34	27594	cofactor metabolic process
44282	0.0010585	0.052092	3	163	34	27594	small molecule catabolic process
24	0.0012322	0.052092	1	1	34	27594	maltose biosynthetic process
10277	0.0012322	0.052092	1	1	34	27594	chlorophyllide a oxygenase activity
16703	0.0012322	0.052092	1	1	34	27594	oxidoreductase activity, acting on single donors with incorporation of molecular oxygen, incorporation of one atom of oxygen (internal monooxygenases or internal mixed function oxidases)
46502	0.0012322	0.052092	1	1	34	27594	uroporphyrinogen III metabolic process
6780	0.0012322	0.052092	1	1	34	27594	uroporphyrinogen III biosynthetic process
4852	0.0012322	0.052092	1	1	34	27594	uroporphyrinogen-III synthase activity
3857	0.0012322	0.052092	1	1	34	27594	3-hydroxyacyl-CoA dehydrogenase activity
6779	0.0013495	0.052092	2	44	34	27594	porphyrin biosynthetic process
33014	0.0016042	0.056293	2	48	34	27594	tetrapyrrole biosynthetic process
6778	0.0024941	0.068463	2	60	34	27594	porphyrin metabolic process
44464	0.0026298	0.068463	23	11708	34	27594	cell part
5623	0.0026298	0.068463	23	11708	34	27594	cell
33013	0.0026605	0.068463	2	62	34	27594	tetrapyrrole metabolic process
16836	0.0033768	0.079174	2	70	34	27594	hydro-lyase activity
23	0.003692	0.079174	1	3	34	27594	maltose metabolic process
60	0.003692	0.079174	1	3	34	27594	protein import into nucleus, translocation
43171	0.0049198	0.08632	1	4	34	27594	peptide catabolic process
4300	0.0049198	0.08632	1	4	34	27594	enoyl-CoA hydratase activity
6751	0.0049198	0.08632	1	4	34	27594	glutathione catabolic process
3840	0.0049198	0.08632	1	4	34	27594	gamma-glutamyltransferase activity
16756	0.006146	0.10315	1	5	34	27594	glutathione gamma-glutamylcysteinyltransferase activity
44275	0.0070274	0.11302	2	102	34	27594	cellular carbohydrate catabolic process
4506	0.0073708	0.11381	1	6	34	27594	squalene monooxygenase activity
16052	0.0082716	0.11819	2	111	34	27594	carbohydrate catabolic process
9056	0.0085134	0.11819	4	660	34	27594	catabolic process
8553	0.0085942	0.11819	1	7	34	27594	hydrogen-exporting ATPase activity, phosphorylative mechanism
18130	0.0096073	0.11819	2	120	34	27594	heterocycle biosynthetic process
16835	0.0097613	0.11819	2	121	34	27594	carbon-oxygen lyase activity
9941	0.0098427	0.11819	3	361	34	27594	chloroplast envelope
16755	0.011036	0.11819	1	9	34	27594	transferase activity, transferring amino-acyl groups
16161	0.011036	0.11819	1	9	34	27594	beta-amylase activity
43492	0.011196	0.11819	2	130	34	27594	ATPase activity, coupled to movement of substances
42626	0.011196	0.11819	2	130	34	27594	ATPase activity, coupled to transmembrane movement of substances
9526	0.011465	0.11819	3	382	34	27594	plastid envelope
16820	0.011694	0.11819	2	133	34	27594	hydrolase activity, acting on acid anhydrides, catalyzing transmembrane movement of substances
9507	0.011804	0.11819	7	2070	34	27594	chloroplast
51188	0.012032	0.11819	2	135	34	27594	cofactor biosynthetic process
6732	0.012373	0.11819	2	137	34	27594	coenzyme metabolic process
50896	0.013383	0.11819	9	3207	34	27594	response to stimulus
44434	0.013445	0.11819	4	755	34	27594	chloroplast part
10588	0.013473	0.11819	1	11	34	27594	cotyledon vascular tissue pattern formation
6749	0.013473	0.11819	1	11	34	27594	glutathione metabolic process
9536	0.013975	0.11987	7	2139	34	27594	plastid
44435	0.015122	0.12689	4	782	34	27594	plastid part
42221	0.016911	0.13468	6	1710	34	27594	response to chemical stimulus
44281	0.017545	0.13468	5	1248	34	27594	small molecule metabolic process
5983	0.018328	0.13468	1	15	34	27594	starch catabolic process
5618	0.018573	0.13468	3	458	34	27594	cell wall
30312	0.019002	0.13468	3	462	34	27594	external encapsulating structure
9251	0.019539	0.13468	1	16	34	27594	glucan catabolic process
15405	0.020704	0.13468	2	180	34	27594	P-P-bond-hydrolysis-driven transmembrane transporter activity
9505	0.020704	0.13468	2	180	34	27594	plant-type cell wall
44247	0.020747	0.13468	1	17	34	27594	cellular polysaccharide catabolic process
16160	0.020747	0.13468	1	17	34	27594	amylase activity
15399	0.02092	0.13468	2	181	34	27594	primary active transmembrane transporter activity
10305	0.021955	0.13468	1	18	34	27594	leaf vascular tissue pattern formation
44273	0.021955	0.13468	1	18	34	27594	sulfur compound catabolic process
16491	0.022197	0.13468	5	1326	34	27594	oxidoreductase activity
9414	0.022453	0.13468	2	188	34	27594	response to water deprivation
5737	0.023088	0.13468	11	4745	34	27594	cytoplasm
22804	0.023471	0.13468	3	501	34	27594	active transmembrane transporter activity
6950	0.024144	0.13468	6	1853	34	27594	response to stress
9415	0.024262	0.13468	2	196	34	27594	response to water
6066	0.025188	0.13468	2	200	34	27594	alcohol metabolic process
8536	0.025568	0.13468	1	21	34	27594	Ran GTPase binding
9109	0.025568	0.13468	1	21	34	27594	coenzyme catabolic process
3824	0.02647	0.13468	15	7553	34	27594	catalytic activity
42219	0.02677	0.13468	1	22	34	27594	cellular amino acid derivative catabolic process
30076	0.02677	0.13468	1	22	34	27594	light-harvesting complex
6098	0.02677	0.13468	1	22	34	27594	pentose-phosphate shunt
5507	0.027323	0.13468	2	209	34	27594	copper ion binding
6518	0.02797	0.13468	1	23	34	27594	peptide metabolic process
31267	0.02797	0.13468	1	23	34	27594	small GTPase binding
6740	0.02797	0.13468	1	23	34	27594	NADPH regeneration
17016	0.02797	0.13468	1	23	34	27594	Ras GTPase binding
16126	0.02797	0.13468	1	23	34	27594	sterol biosynthetic process
16168	0.02797	0.13468	1	23	34	27594	chlorophyll binding
10193	0.02797	0.13468	1	23	34	27594	response to ozone
6635	0.030366	0.13468	1	25	34	27594	fatty acid beta-oxidation
42651	0.03104	0.13468	2	224	34	27594	thylakoid membrane
44444	0.03144	0.13468	10	4323	34	27594	cytoplasmic part
44446	0.031449	0.13468	6	1970	34	27594	intracellular organelle part
272	0.031561	0.13468	1	26	34	27594	polysaccharide catabolic process
6739	0.031561	0.13468	1	26	34	27594	NADP metabolic process
15995	0.031561	0.13468	1	26	34	27594	chlorophyll biosynthetic process
44422	0.031585	0.13468	6	1972	34	27594	organelle part
34357	0.031806	0.13468	2	227	34	27594	photosynthetic membrane
34440	0.032756	0.13468	1	27	34	27594	lipid oxidation
16125	0.032756	0.13468	1	27	34	27594	sterol metabolic process
51020	0.032756	0.13468	1	27	34	27594	GTPase binding
19395	0.032756	0.13468	1	27	34	27594	fatty acid oxidation
16020	0.032798	0.13468	9	3727	34	27594	membrane
16701	0.033949	0.13794	1	28	34	27594	oxidoreductase activity, acting on single donors with incorporation of molecular oxygen
10119	0.03514	0.13925	1	29	34	27594	regulation of stomatal movement
9062	0.03633	0.13925	1	30	34	27594	fatty acid catabolic process
6979	0.037102	0.13925	2	247	34	27594	response to oxidative stress
31967	0.037335	0.13925	3	601	34	27594	organelle envelope
31975	0.037335	0.13925	3	601	34	27594	envelope
43231	0.037404	0.13925	12	5766	34	27594	intracellular membrane-bounded organelle
43227	0.03745	0.13925	12	5767	34	27594	membrane-bounded organelle
46351	0.037519	0.13925	1	31	34	27594	disaccharide biosynthetic process
30258	0.037519	0.13925	1	31	34	27594	lipid modification
46496	0.038706	0.14229	1	32	34	27594	nicotinamide nucleotide metabolic process
51187	0.039892	0.14527	1	33	34	27594	cofactor catabolic process
10087	0.041077	0.14739	1	34	34	27594	phloem or xylem histogenesis
9312	0.04226	0.14739	1	35	34	27594	oligosaccharide biosynthetic process
15662	0.04226	0.14739	1	35	34	27594	ATPase activity, coupled to transmembrane movement of ions, phosphorylative mechanism
44436	0.042426	0.14739	2	266	34	27594	thylakoid part
19362	0.043441	0.14739	1	36	34	27594	pyridine nucleotide metabolic process
42623	0.044456	0.14739	2	273	34	27594	ATPase activity, coupled
6606	0.044621	0.14739	1	37	34	27594	protein import into nucleus
9706	0.044621	0.14739	1	37	34	27594	chloroplast inner membrane
3682	0.044621	0.14739	1	37	34	27594	chromatin binding
5982	0.044621	0.14739	1	37	34	27594	starch metabolic process
5488	0.044675	0.14739	17	9513	34	27594	binding
17111	0.045548	0.14856	3	651	34	27594	nucleoside-triphosphatase activity
6694	0.0458	0.14856	1	38	34	27594	steroid biosynthetic process
15994	0.046977	0.14986	1	39	34	27594	chlorophyll metabolic process
51170	0.046977	0.14986	1	39	34	27594	nuclear import
9528	0.048153	0.1499	1	40	34	27594	plastid inner membrane
6733	0.048153	0.1499	1	40	34	27594	oxidoreduction coenzyme metabolic process
34504	0.048153	0.1499	1	40	34	27594	protein localization in nucleus
10149	0.049328	0.15106	1	41	34	27594	senescence
10218	0.049328	0.15106	1	41	34	27594	response to far red light

## Sheet: SS-CHH-DMR-DEGs-specific
GO-ID	p-value	corr p-value	x	n	X	N	Description
16491	0.0012888	0.1028	5	1326	18	27594	oxidoreductase activity
4657	0.0013042	0.1028	1	2	18	27594	proline dehydrogenase activity
6562	0.0019557	0.1028	1	3	18	27594	proline catabolic process
6537	0.0026069	0.1028	1	4	18	27594	glutamate biosynthetic process
6521	0.0032576	0.1028	1	5	18	27594	regulation of cellular amino acid metabolic process
33238	0.0039079	0.1028	1	6	18	27594	regulation of cellular amine metabolic process
3854	0.0045578	0.1028	1	7	18	27594	3-beta-hydroxy-delta5-steroid dehydrogenase activity
9065	0.0045578	0.1028	1	7	18	27594	glutamine family amino acid catabolic process
33764	0.0045578	0.1028	1	7	18	27594	steroid dehydrogenase activity, acting on the CH-OH group of donors, NAD or NADP as acceptor
6560	0.0058564	0.11888	1	9	18	27594	proline metabolic process
16229	0.0071534	0.12655	1	11	18	27594	steroid dehydrogenase activity
5509	0.007481	0.12655	2	201	18	27594	calcium ion binding
6536	0.0090959	0.14204	1	14	18	27594	glutamate metabolic process
31348	0.01168	0.16262	1	18	18	27594	negative regulation of defense response
9084	0.012326	0.16262	1	19	18	27594	glutamine family amino acid biosynthetic process
16597	0.014902	0.16262	1	23	18	27594	amino acid binding
43176	0.015545	0.16262	1	24	18	27594	amine binding
16645	0.015545	0.16262	1	24	18	27594	oxidoreductase activity, acting on the CH-NH group of donors
10565	0.015545	0.16262	1	24	18	27594	regulation of cellular ketone metabolic process
16682	0.017472	0.16262	1	27	18	27594	oxidoreductase activity, acting on diphenols and related substances as donors, oxygen as acceptor
46700	0.018114	0.16262	1	28	18	27594	heterocycle catabolic process
10260	0.018755	0.16262	1	29	18	27594	organ senescence
5488	0.018827	0.16262	11	9513	18	27594	binding
16762	0.020676	0.16262	1	32	18	27594	xyloglucan:xyloglucosyl transferase activity
9063	0.021315	0.16262	1	33	18	27594	cellular amino acid catabolic process
9310	0.022593	0.16262	1	35	18	27594	amine catabolic process
16679	0.022593	0.16262	1	35	18	27594	oxidoreductase activity, acting on diphenols and related substances as donors
9064	0.022593	0.16262	1	35	18	27594	glutamine family amino acid metabolic process
31406	0.023232	0.16262	1	36	18	27594	carboxylic acid binding
6694	0.024507	0.16583	1	38	18	27594	steroid biosynthetic process
10149	0.026418	0.17299	1	41	18	27594	senescence
10033	0.028329	0.17971	3	1037	18	27594	response to organic substance
9813	0.029594	0.18205	1	46	18	27594	flavonoid biosynthetic process
9812	0.032761	0.18818	1	51	18	27594	flavonoid metabolic process
9738	0.034024	0.18818	1	53	18	27594	abscisic acid mediated signaling pathway
71215	0.034024	0.18818	1	53	18	27594	cellular response to abscisic acid stimulus
3824	0.034298	0.18818	9	7553	18	27594	catalytic activity
9624	0.037177	0.19207	1	58	18	27594	response to nematode
46872	0.038287	0.19207	4	2020	18	27594	metal ion binding
8202	0.038436	0.19207	1	60	18	27594	steroid metabolic process
6519	0.038881	0.19207	2	483	18	27594	cellular amino acid and derivative metabolic process
31347	0.041575	0.19207	1	65	18	27594	regulation of defense response
48585	0.042201	0.19207	1	66	18	27594	negative regulation of response to stimulus
16054	0.044704	0.19207	1	70	18	27594	organic acid catabolic process
46395	0.044704	0.19207	1	70	18	27594	carboxylic acid catabolic process
16706	0.044704	0.19207	1	70	18	27594	oxidoreductase activity, acting on paired donors, with incorporation or reduction of molecular oxygen, 2-oxoglutarate as one donor, and incorporation of one atom each of oxygen into both donors
9735	0.045953	0.19207	1	72	18	27594	response to cytokinin stimulus
43167	0.046363	0.19207	4	2147	18	27594	ion binding
43169	0.046363	0.19207	4	2147	18	27594	cation binding
80134	0.049691	0.20175	1	78	18	27594	regulation of response to stress

## Sheet: ST-CHH-DMR-DEGs-specific
GO-ID	p-value	corr p-value	x	n	X	N	Description
9808	3.989e-07	0.00016913	4	44	38	27593	lignin metabolic process
9698	1.0656e-06	0.00022591	5	133	38	27593	phenylpropanoid metabolic process
19748	5.5909e-06	0.00079018	6	330	38	27593	secondary metabolic process
9809	7.7082e-06	0.00081707	3	28	38	27593	lignin biosynthetic process
9699	1.2736e-05	0.00108	4	104	38	27593	phenylpropanoid biosynthetic process
6575	1.5778e-05	0.001115	5	231	38	27593	cellular amino acid derivative metabolic process
6725	5.1577e-05	0.0031241	5	296	38	27593	cellular aromatic compound metabolic process
42398	8.9169e-05	0.004726	4	171	38	27593	cellular amino acid derivative biosynthetic process
19438	0.00010188	0.0047996	4	177	38	27593	aromatic compound biosynthetic process
6519	0.0005017	0.021272	5	483	38	27593	cellular amino acid and derivative metabolic process
33799	0.0013772	0.033031	1	1	38	27593	myricetin 3'-O-methyltransferase activity
30755	0.0013772	0.033031	1	1	38	27593	quercetin 3-O-methyltransferase activity
47172	0.0013772	0.033031	1	1	38	27593	shikimate O-hydroxycinnamoyltransferase activity
50269	0.0013772	0.033031	1	1	38	27593	coniferyl-aldehyde dehydrogenase activity
47205	0.0013772	0.033031	1	1	38	27593	quinate O-hydroxycinnamoyltransferase activity
50737	0.0013772	0.033031	1	1	38	27593	O-hydroxycinnamoyltransferase activity
47763	0.0013772	0.033031	1	1	38	27593	caffeate O-methyltransferase activity
44281	0.0014023	0.033031	7	1248	38	27593	small molecule metabolic process
9637	0.0021699	0.038902	2	50	38	27593	response to blue light
10360	0.0027525	0.038902	1	2	38	27593	negative regulation of anion channel activity
10361	0.0027525	0.038902	1	2	38	27593	regulation of anion channel activity by blue light
10362	0.0027525	0.038902	1	2	38	27593	negative regulation of anion channel activity by blue light
46345	0.0027525	0.038902	1	2	38	27593	abscisic acid catabolic process
43290	0.0027525	0.038902	1	2	38	27593	apocarotenoid catabolic process
4445	0.0027525	0.038902	1	2	38	27593	inositol-polyphosphate 5-phosphatase activity
51763	0.0027525	0.038902	1	2	38	27593	sesquiterpene catabolic process
32410	0.0027525	0.038902	1	2	38	27593	negative regulation of transporter activity
32413	0.0027525	0.038902	1	2	38	27593	negative regulation of ion transmembrane transporter activity
16107	0.0027525	0.038902	1	2	38	27593	sesquiterpenoid catabolic process
51051	0.0027525	0.038902	1	2	38	27593	negative regulation of transport
9963	0.0041259	0.049983	1	3	38	27593	positive regulation of flavonoid biosynthetic process
46838	0.0041259	0.049983	1	3	38	27593	phosphorylated carbohydrate dephosphorylation
46855	0.0041259	0.049983	1	3	38	27593	inositol phosphate dephosphorylation
10155	0.0041259	0.049983	1	3	38	27593	regulation of proton transport
46030	0.0041259	0.049983	1	3	38	27593	inositol trisphosphate phosphatase activity
16791	0.0045857	0.051799	3	244	38	27593	phosphatase activity
10295	0.0054976	0.051799	1	4	38	27593	(+)-abscisic acid 8'-hydroxylase activity
9573	0.0054976	0.051799	1	4	38	27593	chloroplast ribulose bisphosphate carboxylase complex
48492	0.0054976	0.051799	1	4	38	27593	ribulose bisphosphate carboxylase complex
50734	0.0054976	0.051799	1	4	38	27593	hydroxycinnamoyltransferase activity
16984	0.0054976	0.051799	1	4	38	27593	ribulose-bisphosphate carboxylase activity
9898	0.0054976	0.051799	1	4	38	27593	internal side of plasma membrane
9904	0.0054976	0.051799	1	4	38	27593	chloroplast accumulation movement
50879	0.0054976	0.051799	1	4	38	27593	multicellular organismal movement
10031	0.0054976	0.051799	1	4	38	27593	circumnutation
3824	0.0066435	0.058235	18	7553	38	27593	catalytic activity
46247	0.0068674	0.058235	1	5	38	27593	terpene catabolic process
32957	0.0068674	0.058235	1	5	38	27593	inositol trisphosphate metabolic process
9882	0.0068674	0.058235	1	5	38	27593	blue light photoreceptor activity
9903	0.0068674	0.058235	1	5	38	27593	chloroplast avoidance movement
48046	0.0071109	0.059118	3	286	38	27593	apoplast
44070	0.0082353	0.059183	1	6	38	27593	regulation of anion transport
10359	0.0082353	0.059183	1	6	38	27593	regulation of anion channel activity
22898	0.0082353	0.059183	1	6	38	27593	regulation of transmembrane transporter activity
32409	0.0082353	0.059183	1	6	38	27593	regulation of transporter activity
32412	0.0082353	0.059183	1	6	38	27593	regulation of ion transmembrane transporter activity
4029	0.0082353	0.059183	1	6	38	27593	aldehyde dehydrogenase (NAD) activity
34762	0.0082353	0.059183	1	6	38	27593	regulation of transmembrane transport
34765	0.0082353	0.059183	1	6	38	27593	regulation of ion transmembrane transport
42578	0.0084771	0.059905	3	305	38	27593	phosphoric ester hydrolase activity
4805	0.0096014	0.066738	1	7	38	27593	trehalose-phosphatase activity
44283	0.010289	0.070367	4	622	38	27593	small molecule biosynthetic process
51552	0.010966	0.070446	1	8	38	27593	flavone metabolic process
51553	0.010966	0.070446	1	8	38	27593	flavone biosynthetic process
51554	0.010966	0.070446	1	8	38	27593	flavonol metabolic process
51555	0.010966	0.070446	1	8	38	27593	flavonol biosynthetic process
71704	0.012328	0.072599	1	9	38	27593	organic substance metabolic process
51667	0.012328	0.072599	1	9	38	27593	establishment of plastid localization
15977	0.012328	0.072599	1	9	38	27593	carbon fixation
43647	0.012328	0.072599	1	9	38	27593	inositol phosphate metabolic process
9881	0.012328	0.072599	1	9	38	27593	photoreceptor activity
9902	0.012328	0.072599	1	9	38	27593	chloroplast relocation
51644	0.013689	0.078433	1	10	38	27593	plastid localization
19203	0.013689	0.078433	1	10	38	27593	carbohydrate phosphatase activity
8300	0.015048	0.08395	1	11	38	27593	isoprenoid catabolic process
16115	0.015048	0.08395	1	11	38	27593	terpenoid catabolic process
51649	0.015416	0.084305	3	381	38	27593	establishment of localization in cell
46271	0.016405	0.084305	1	12	38	27593	phenylpropanoid catabolic process
46274	0.016405	0.084305	1	12	38	27593	lignin catabolic process
43269	0.016405	0.084305	1	12	38	27593	regulation of ion transport
9638	0.016405	0.084305	1	12	38	27593	phototropism
51656	0.016405	0.084305	1	12	38	27593	establishment of organelle localization
51234	0.016503	0.084305	6	1514	38	27593	establishment of localization
5576	0.016733	0.084464	3	393	38	27593	extracellular region
5315	0.01776	0.08756	1	13	38	27593	inorganic phosphate transmembrane transporter activity
6020	0.01776	0.08756	1	13	38	27593	inositol metabolic process
10311	0.019113	0.089971	1	14	38	27593	lateral root formation
6817	0.019113	0.089971	1	14	38	27593	phosphate transport
4028	0.019113	0.089971	1	14	38	27593	3-chloroallyl aldehyde dehydrogenase activity
51179	0.019188	0.089971	6	1566	38	27593	localization
51641	0.01931	0.089971	3	415	38	27593	cellular localization
9639	0.020252	0.093301	2	159	38	27593	response to red or far red light
9962	0.020465	0.093301	1	15	38	27593	regulation of flavonoid biosynthetic process
44282	0.021215	0.095691	2	163	38	27593	small molecule catabolic process
8471	0.021814	0.097361	1	16	38	27593	laccase activity
10252	0.024508	0.10197	1	18	38	27593	auxin homeostasis
43288	0.024508	0.10197	1	18	38	27593	apocarotenoid metabolic process
51640	0.024508	0.10197	1	18	38	27593	organelle localization
9687	0.024508	0.10197	1	18	38	27593	abscisic acid metabolic process
15114	0.024508	0.10197	1	18	38	27593	phosphate transmembrane transporter activity
10181	0.024508	0.10197	1	18	38	27593	FMN binding
9416	0.024529	0.10197	3	455	38	27593	response to light stimulus
9505	0.025511	0.1044	2	180	38	27593	plant-type cell wall
5992	0.025853	0.1044	1	19	38	27593	trehalose biosynthetic process
19439	0.025853	0.1044	1	19	38	27593	aromatic compound catabolic process
9314	0.026811	0.10725	3	471	38	27593	response to radiation
16192	0.027917	0.11062	2	189	38	27593	vesicle-mediated transport
42219	0.029875	0.1131	1	22	38	27593	cellular amino acid derivative catabolic process
51761	0.029875	0.1131	1	22	38	27593	sesquiterpene metabolic process
6714	0.029875	0.1131	1	22	38	27593	sesquiterpenoid metabolic process
46777	0.029875	0.1131	1	22	38	27593	protein amino acid autophosphorylation
5991	0.029875	0.1131	1	22	38	27593	trehalose metabolic process
22804	0.031388	0.11778	3	501	38	27593	active transmembrane transporter activity
5507	0.033576	0.12238	2	209	38	27593	copper ion binding
51049	0.033881	0.12238	1	25	38	27593	regulation of transport
16788	0.034988	0.12238	4	904	38	27593	hydrolase activity, acting on ester bonds
48475	0.035212	0.12238	1	26	38	27593	coated membrane
48544	0.035212	0.12238	1	26	38	27593	recognition of pollen
30117	0.035212	0.12238	1	26	38	27593	membrane coat
8037	0.035212	0.12238	1	26	38	27593	cell recognition
10101	0.035212	0.12238	1	26	38	27593	post-embryonic root morphogenesis
10102	0.035212	0.12238	1	26	38	27593	lateral root morphogenesis
16682	0.036542	0.12495	1	27	38	27593	oxidoreductase activity, acting on diphenols and related substances as donors, oxygen as acceptor
6904	0.036542	0.12495	1	27	38	27593	vesicle docking involved in exocytosis
48278	0.03787	0.12643	1	28	38	27593	vesicle docking
6887	0.03787	0.12643	1	28	38	27593	exocytosis
22406	0.03787	0.12643	1	28	38	27593	membrane docking
145	0.039197	0.12883	1	29	38	27593	exocyst
10119	0.039197	0.12883	1	29	38	27593	regulation of stomatal movement
32879	0.040521	0.13016	1	30	38	27593	regulation of localization
8374	0.040521	0.13016	1	30	38	27593	O-acyltransferase activity
43455	0.040521	0.13016	1	30	38	27593	regulation of secondary metabolic process
46351	0.041844	0.1324	1	31	38	27593	disaccharide biosynthetic process
8171	0.041844	0.1324	1	31	38	27593	O-methyltransferase activity
9875	0.043165	0.13557	1	32	38	27593	pollen-pistil interaction
4437	0.045802	0.1427	1	34	38	27593	inositol or phosphatidylinositol phosphatase activity
9312	0.047117	0.1427	1	35	38	27593	oligosaccharide biosynthetic process
156	0.047117	0.1427	1	35	38	27593	two-component response regulator activity
16620	0.047117	0.1427	1	35	38	27593	oxidoreductase activity, acting on the aldehyde or oxo group of donors, NAD or NADP as acceptor
16679	0.047117	0.1427	1	35	38	27593	oxidoreductase activity, acting on diphenols and related substances as donors
19751	0.048431	0.14461	1	36	38	27593	polyol metabolic process
45735	0.048431	0.14461	1	36	38	27593	nutrient reservoir activity
15291	0.049455	0.14546	2	259	38	27593	secondary active transmembrane transporter activity
42214	0.049744	0.14546	1	37	38	27593	terpene metabolic process
16709	0.049744	0.14546	1	37	38	27593	oxidoreductase activity, acting on paired donors, with incorporation or reduction of molecular oxygen, NADH or NADPH as one donor, and incorporation of one atom of oxygen
